# Supplementary material for: Genome-wide binding analysis of 195 DNA binding proteins reveals “reservoir” promoters and human specific SVA-repeat family regulation
Source: PLoS One. 2021 Jun 24;16(6):e0237055. doi: 10.1371/journal.pone.0237055 (PMC8224974; doi:10.1371/journal.pone.0237055)
Supplement: S2 Table — Each observation (row) is a promoter and each column a variable investigated in this study. (CSV) [file pone.0237055.s009.csv]

gene_id	strand	gene_name	gene_type	chr	X3kb_up_tss_start	number_of_dbp	tpm	expression	tf_binding	reservoir	promoter_median_tpm	promoter_max_tpm	conservative_reservoir	annotated_superenhancer	num_nearby_promoters	nearby_promoter_gene_ids	nearby_promoter_gene_names	nearby_promoter_gene_type	nearby_promoter_gene_strands	shared_promoter_type	nascentTpm	k27me3	k27ac
ENSG00000000003.15	-	TSPAN6	protein_coding	chrX	100636992	0	0.019937065	expressed	low	0	0.048459984	0.211683628	0	FALSE	NA	NA	NA	NA	NA	none	0.240678521	0	0
ENSG00000000005.6	+	TNMD	protein_coding	chrX	100581936	0	0.046502106	expressed	low	0	0	0	0	FALSE	NA	NA	NA	NA	NA	none	0	0	0
ENSG00000000419.12	-	DPM1	protein_coding	chr20	50955556	35	84.72555941	expressed	low	0	30.99409859	49.99272079	0	FALSE	2	ENSG00000000419.12;ENSG00000124217.5	DPM1;MOCS3	protein_coding;protein_coding	-;+	bidirectional	0.722035563	0	1
ENSG00000000457.14	-	SCYL3	protein_coding	chr1	169891268	57	4.592118524	expressed	low	0	1.135047092	4.031005341	0	FALSE	NA	NA	NA	NA	NA	none	49.10815151	0	1
ENSG00000000460.17	+	C1orf112	protein_coding	chr1	169659007	12	11.90866819	expressed	low	0	1.213054548	2.235920409	0	FALSE	NA	NA	NA	NA	NA	none	5.456069861	0	0
ENSG00000000938.13	-	FGR	protein_coding	chr1	27632186	8	0.026739954	expressed	low	0	0.040454981	0.095976318	0	FALSE	NA	NA	NA	NA	NA	none	1.303847835	1	0
ENSG00000000971.15	+	CFH	protein_coding	chr1	196648878	20	57.38059782	expressed	low	0	12.79058951	32.43999537	0	FALSE	NA	NA	NA	NA	NA	none	2.353761129	0	1
ENSG00000001036.14	-	FUCA2	protein_coding	chr6	143508721	61	57.02077113	expressed	low	0	17.40872127	32.631948	0	FALSE	NA	NA	NA	NA	NA	none	36.59846136	0	1
ENSG00000001084.13	-	GCLC	protein_coding	chr6	53613971	30	3.593460413	expressed	low	0	0.018753033	0.0621089	0	FALSE	2	ENSG00000001084.13;ENSG00000231683.6	GCLC;AL033397.1	protein_coding;lncRNA	-;-	nearby_same_strand	0	0	1
ENSG00000001167.14	+	NFYA	protein_coding	chr6	41069945	51	10.31236089	expressed	low	0	24.16450116	36.06440057	0	FALSE	NA	NA	NA	NA	NA	none	157.4859765	0	1
ENSG00000001460.18	-	STPG1	protein_coding	chr1	24413935	47	0.985006235	expressed	low	0	6.851882637	11.94905155	0	FALSE	NA	NA	NA	NA	NA	none	2.968713451	0	1
ENSG00000001461.17	+	NIPAL3	protein_coding	chr1	24412802	52	7.049876096	expressed	low	0	4.421500642	6.964160111	0	FALSE	NA	NA	NA	NA	NA	none	16.56145695	0	1
ENSG00000001497.16	-	LAS1L	protein_coding	chrX	65531776	36	26.47248903	expressed	low	0	43.16146614	56.83642892	0	FALSE	NA	NA	NA	NA	NA	none	13.7395948	0	1
ENSG00000001561.7	+	ENPP4	protein_coding	chr6	46126989	1	0	off	low	0	0.076799969	1.180069105	0	FALSE	2	ENSG00000231769.3;ENSG00000001561.7	AL035701.1;ENPP4	lncRNA;protein_coding	-;+	bidirectional	0	1	0
ENSG00000001617.12	+	SEMA3F	protein_coding	chr3	50152045	14	0.383711192	expressed	low	0	0.354883051	0.523638449	0	FALSE	NA	NA	NA	NA	NA	none	0	0	0
ENSG00000001626.15	+	CFTR	protein_coding	chr7	117462784	0	0.007346367	expressed	low	0	0	0	0	FALSE	NA	NA	NA	NA	NA	none	0.240678521	0	0
ENSG00000001629.10	+	ANKIB1	protein_coding	chr7	92242974	56	8.986606538	expressed	low	0	19.79287739	32.29603089	0	FALSE	3	ENSG00000285953.1;ENSG00000001631.15;ENSG00000001629.10	AC000120.3;KRIT1;ANKIB1	protein_coding;protein_coding;protein_coding	-;-;+	multiple_nearby_promoters	0	0	1
ENSG00000001630.17	-	CYP51A1	protein_coding	chr7	92131804	79	9.208981637	expressed	low	0	19.72998286	52.77009417	0	FALSE	NA	NA	NA	NA	NA	none	0.12033926	0	1
ENSG00000001631.15	-	KRIT1	protein_coding	chr7	92243167	56	4.435622616	expressed	low	0	19.77385525	31.48023219	0	FALSE	3	ENSG00000285953.1;ENSG00000001631.15;ENSG00000001629.10	AC000120.3;KRIT1;ANKIB1	protein_coding;protein_coding;protein_coding	-;-;+	multiple_nearby_promoters	0.474729032	0	1
ENSG00000002016.18	-	RAD52	protein_coding	chr12	987054	43	4.532746807	expressed	low	0	3.714453942	5.353702584	0	FALSE	2	ENSG00000002016.18;ENSG00000082805.20	RAD52;ERC1	protein_coding;protein_coding	-;+	bidirectional	0.595068292	0	1
ENSG00000002330.13	-	BAD	protein_coding	chr11	64281705	29	10.35261573	expressed	low	0	11.7759702	23.62288033	0	FALSE	NA	NA	NA	NA	NA	none	125.239195	0	1
ENSG00000002549.12	+	LAP3	protein_coding	chr4	17574192	37	46.58678914	expressed	low	0	21.9293878	115.6367182	0	FALSE	NA	NA	NA	NA	NA	none	31.05519229	0	1
ENSG00000002586.20	+	CD99	protein_coding	chrX	2688187	0	3.861396455	expressed	low	0	2.949593194	5.773895974	0	FALSE	NA	NA	NA	NA	NA	none	7.408010068	0	1
ENSG00000002586.20_PAR_Y	+	CD99	protein_coding	chrY	2688187	0	0	off	low	0	0	0	0	FALSE	NA	NA	NA	NA	NA	none	6.793057745	0	0
ENSG00000002587.10	-	HS3ST1	protein_coding	chr4	11426565	0	0	off	low	0	0	0	0	FALSE	NA	NA	NA	NA	NA	none	0	0	0
ENSG00000002726.20	+	AOC1	protein_coding	chr7	150821627	22	0.005700161	expressed	low	0	0.025297407	0.165813336	0	FALSE	NA	NA	NA	NA	NA	none	0.12033926	1	0
ENSG00000002745.13	+	WNT16	protein_coding	chr7	121322367	2	0.059389851	expressed	low	0	0	0.105459287	0	FALSE	NA	NA	NA	NA	NA	none	0.481357042	1	0
ENSG00000002746.15	+	HECW1	protein_coding	chr7	43109629	7	0.010083895	expressed	low	0	0	0.143964476	0	FALSE	NA	NA	NA	NA	NA	none	0.468101022	1	0
ENSG00000002822.15	-	MAD1L1	protein_coding	chr7	2230244	21	0.29788509	expressed	low	0	45.07321228	75.2378012	0	FALSE	NA	NA	NA	NA	NA	none	103.4449504	0	1
ENSG00000002834.18	+	LASP1	protein_coding	chr17	38866859	68	32.53805868	expressed	low	0	22.15187755	101.138808	0	FALSE	NA	NA	NA	NA	NA	none	63.2087641	0	1
ENSG00000002919.14	+	SNX11	protein_coding	chr17	48100357	29	8.481966251	expressed	low	0	7.928902588	12.3116402	0	FALSE	2	ENSG00000108468.15;ENSG00000002919.14	CBX1;SNX11	protein_coding;protein_coding	-;+	bidirectional	0.481357042	0	1
ENSG00000002933.9	+	TMEM176A	protein_coding	chr7	150797403	2	0.138182271	expressed	low	0	0.099213932	0.376642393	0	FALSE	NA	NA	NA	NA	NA	none	0.240678521	1	0
ENSG00000003056.8	-	M6PR	protein_coding	chr12	8946762	45	40.27640466	expressed	low	0	15.54139197	27.98100044	0	FALSE	2	ENSG00000003056.8;ENSG00000139187.10	M6PR;KLRG1	protein_coding;protein_coding	-;+	bidirectional	0	0	1
ENSG00000003096.14	-	KLHL13	protein_coding	chrX	118114341	3	1.022819272	expressed	low	0	0.1998111	1.199703971	0	FALSE	NA	NA	NA	NA	NA	none	4.533123837	1	1
ENSG00000003137.8	-	CYP26B1	protein_coding	chr2	72145039	1	0	off	low	0	0	0.052729644	0	FALSE	NA	NA	NA	NA	NA	none	0.12033926	1	0
ENSG00000003147.19	-	ICA1	protein_coding	chr7	8259688	36	8.272549886	expressed	low	0	2.990874829	5.278697471	0	FALSE	NA	NA	NA	NA	NA	none	1.069797324	0	1
ENSG00000003249.13	-	DBNDD1	protein_coding	chr16	90017129	31	1.328071729	expressed	low	0	2.293661492	4.950157163	0	FALSE	NA	NA	NA	NA	NA	none	17.48440298	0	1
ENSG00000003393.15	-	ALS2	protein_coding	chr2	201777957	31	5.762962664	expressed	low	0	1.677064977	4.031005341	0	FALSE	NA	NA	NA	NA	NA	none	18.19877545	0	1
ENSG00000003400.14	+	CASP10	protein_coding	chr2	201179881	46	7.089033056	expressed	low	0	2.865521045	5.844920093	0	FALSE	NA	NA	NA	NA	NA	none	5.422929811	0	1
ENSG00000003402.20	+	CFLAR	protein_coding	chr2	201113154	68	6.757618632	expressed	low	0	30.10235438	44.82548476	0	TRUE	NA	NA	NA	NA	NA	none	104.6744375	0	1
ENSG00000003436.16	-	TFPI	protein_coding	chr2	187562761	2	13.65117477	expressed	low	0	0.068427532	0.191952635	0	FALSE	NA	NA	NA	NA	NA	none	0.361017781	0	0
ENSG00000003509.16	+	NDUFAF7	protein_coding	chr2	37228631	41	10.49218449	expressed	low	0	26.84049864	59.31336431	0	FALSE	2	ENSG00000115816.15;ENSG00000003509.16	CEBPZ;NDUFAF7	protein_coding;protein_coding	-;+	bidirectional	0	0	1
ENSG00000003756.17	+	RBM5	protein_coding	chr3	50085919	20	11.7205276	expressed	low	0	11.24079316	36.14737995	0	FALSE	NA	NA	NA	NA	NA	none	13.38520503	0	1
ENSG00000003987.14	-	MTMR7	protein_coding	chr8	17410529	0	0.673811522	expressed	low	0	0	0	0	FALSE	NA	NA	NA	NA	NA	none	0	1	0
ENSG00000003989.17	+	SLC7A2	protein_coding	chr8	17494088	5	0.008682746	expressed	low	0	0.013182411	0.095976318	0	FALSE	NA	NA	NA	NA	NA	none	0.722035563	1	0
ENSG00000004059.11	+	ARF5	protein_coding	chr7	127585386	54	67.91767553	expressed	low	0	127.0125986	414.316773	0	FALSE	NA	NA	NA	NA	NA	none	30.24139966	0	1
ENSG00000004139.14	+	SARM1	protein_coding	chr17	28361356	2	0.101311945	expressed	low	0	15.46720208	25.41466334	0	FALSE	2	ENSG00000265618.1;ENSG00000004139.14	AC002094.2;SARM1	lncRNA;protein_coding	-;+	bidirectional	0	0	0
ENSG00000004142.12	-	POLDIP2	protein_coding	chr17	28354528	34	58.62708091	expressed	low	0	33.07233808	44.93774563	0	FALSE	3	ENSG00000004142.12;ENSG00000244045.13;ENSG00000258924.4	POLDIP2;TMEM199;AC002094.1	protein_coding;protein_coding;lncRNA	-;+;+	multiple_nearby_promoters	1.658237606	0	1
ENSG00000004399.12	-	PLXND1	protein_coding	chr3	129603819	34	1.672355699	expressed	low	0	2.303789641	8.094000292	0	FALSE	NA	NA	NA	NA	NA	none	10.17581306	0	1
ENSG00000004455.17	-	AK2	protein_coding	chr1	33077997	11	83.03707284	expressed	low	0	0.244188198	0.456790987	0	FALSE	2	ENSG00000004455.17;ENSG00000142920.17	AK2;AZIN2	protein_coding;protein_coding	-;+	bidirectional	0	1	0
ENSG00000004468.13	+	CD38	protein_coding	chr4	15775275	2	0.039226381	expressed	low	0	0.044720746	0.079094465	0	FALSE	NA	NA	NA	NA	NA	none	0.361017781	1	0
ENSG00000004478.8	+	FKBP4	protein_coding	chr12	2791970	16	50.46049433	expressed	low	0	57.905648	125.4560199	0	FALSE	2	ENSG00000256030.1;ENSG00000004478.8	CBX3P4;FKBP4	transcribed_processed_pseudogene;protein_coding	-;+	bidirectional	43.27117984	0	1
ENSG00000004487.16	+	KDM1A	protein_coding	chr1	23016443	49	89.65888662	expressed	low	0	30.36831944	64.69187031	0	FALSE	NA	NA	NA	NA	NA	none	47.66408039	0	1
ENSG00000004534.15	+	RBM6	protein_coding	chr3	49937007	39	19.55401736	expressed	low	0	3.43681631	5.181666749	0	FALSE	NA	NA	NA	NA	NA	none	38.48412146	0	1
ENSG00000004660.15	-	CAMKK1	protein_coding	chr17	3891892	25	1.313169218	expressed	low	0	19.81577943	36.64425115	0	FALSE	NA	NA	NA	NA	NA	none	24.61755939	0	1
ENSG00000004700.16	-	RECQL	protein_coding	chr12	21498670	33	19.97554848	expressed	low	0	8.93553838	26.11560042	0	FALSE	2	ENSG00000004700.16;ENSG00000111711.10	RECQL;GOLT1B	protein_coding;protein_coding	-;+	bidirectional	0	0	1
ENSG00000004766.17	+	VPS50	protein_coding	chr7	93229340	34	6.945180729	expressed	low	0	1.269508629	5.470650106	0	FALSE	NA	NA	NA	NA	NA	none	9.540976706	0	1
ENSG00000004776.13	-	HSPB6	protein_coding	chr19	35755080	38	0.077743249	expressed	low	0	3.845622171	9.389156794	0	FALSE	2	ENSG00000004776.13;ENSG00000167595.15	HSPB6;PROSER3	protein_coding;protein_coding	-;+	bidirectional	0	0	1
ENSG00000004777.18	+	ARHGAP33	protein_coding	chr19	35771532	17	1.007043057	expressed	low	0	0.952928977	2.744108862	0	FALSE	NA	NA	NA	NA	NA	none	20.25117089	0	1
ENSG00000004779.10	-	NDUFAB1	protein_coding	chr16	23593317	87	135.4982256	expressed	low	0	46.74010709	79.71476127	0	FALSE	NA	NA	NA	NA	NA	none	33.85820549	0	1
ENSG00000004799.8	-	PDK4	protein_coding	chr7	95593517	6	0.067359247	expressed	low	0	0.061081209	0.131824109	0	FALSE	NA	NA	NA	NA	NA	none	1.912172147	1	0
ENSG00000004809.14	-	SLC22A16	protein_coding	chr6	110473642	0	0	off	low	0	0.012114996	0.095976318	0	FALSE	2	ENSG00000004809.14;ENSG00000260188.1	SLC22A16;AC002464.1	protein_coding;lncRNA	-;+	bidirectional	0	1	0
ENSG00000004838.14	-	ZMYND10	protein_coding	chr3	50342733	5	0.442246823	expressed	low	0	16.46574074	23.70856637	0	FALSE	NA	NA	NA	NA	NA	none	13.07824641	0	1
ENSG00000004846.16	+	ABCB5	protein_coding	chr7	20612207	1	0.005410451	expressed	low	0	0	0	0	FALSE	NA	NA	NA	NA	NA	none	0	0	0
ENSG00000004848.8	-	ARX	protein_coding	chrX	25013421	7	0	off	low	0	0	0	0	FALSE	NA	NA	NA	NA	NA	none	1.196764594	1	0
ENSG00000004864.13	-	SLC25A13	protein_coding	chr7	96319148	46	40.57235693	expressed	low	0	8.83670389	13.92832022	0	FALSE	NA	NA	NA	NA	NA	none	49.5420774	0	1
ENSG00000004866.20	+	ST7	protein_coding	chr7	116950238	97	7.989502059	expressed	low	0	8.540959488	17.41970165	0	FALSE	7	ENSG00000227199.1;ENSG00000275359.1;ENSG00000277583.1;ENSG00000004866.20;ENSG00000214188.9;ENSG00000273596.1;ENSG00000273571.1	ST7-AS1;AC106873.5;AC106873.7;ST7;ST7-OT4;AC106873.3;AC106873.2	lncRNA;misc_RNA;misc_RNA;protein_coding;lncRNA;misc_RNA;misc_RNA	-;+;+;+;+;+;+	multiple_nearby_promoters	0.240678521	0	1
ENSG00000004897.12	-	CDC27	protein_coding	chr17	47186423	44	28.02718783	expressed	low	0	6.405927982	10.3633335	0	FALSE	NA	NA	NA	NA	NA	none	20.75344704	0	1
ENSG00000004939.15	-	SLC4A1	protein_coding	chr17	44265142	63	0.251018354	expressed	low	0	0.059167789	1.180069105	0	FALSE	NA	NA	NA	NA	NA	none	0.715407553	0	0
ENSG00000004948.15	-	CALCR	protein_coding	chr7	93571731	0	0.104886358	expressed	low	0	0.031624008	0.143964476	0	FALSE	NA	NA	NA	NA	NA	none	1.444071125	1	0
ENSG00000004961.15	+	HCCS	protein_coding	chrX	11108301	28	19.50720535	expressed	low	0	13.44495868	16.84384375	0	FALSE	2	ENSG00000234129.8;ENSG00000004961.15	AC073529.1;HCCS	lncRNA;protein_coding	-;+	bidirectional	0	0	1
ENSG00000004975.12	-	DVL2	protein_coding	chr17	7231518	42	11.5121656	expressed	low	0	46.01605555	67.23333664	0	FALSE	NA	NA	NA	NA	NA	none	133.0163035	0	1
ENSG00000005001.10	-	PRSS22	protein_coding	chr16	2855171	3	0.009143212	expressed	low	0	0.059934749	0.145379951	0	FALSE	NA	NA	NA	NA	NA	none	0	1	0
ENSG00000005007.12	+	UPF1	protein_coding	chr19	18828938	31	24.15166863	expressed	low	0	6.991891544	17.75599852	0	FALSE	NA	NA	NA	NA	NA	none	69.88707551	0	1
ENSG00000005020.13	-	SKAP2	protein_coding	chr7	26992240	0	3.160244738	expressed	low	0	0	0	0	FALSE	NA	NA	NA	NA	NA	none	0.12033926	0	0
ENSG00000005022.6	+	SLC25A5	protein_coding	chrX	119465422	44	314.2077028	expressed	low	0	497.3018573	519.9142859	0	FALSE	NA	NA	NA	NA	NA	none	0.481357042	0	1
ENSG00000005059.16	+	MCUB	protein_coding	chr4	109557209	31	4.235656701	expressed	low	0	0.912914008	2.207455306	0	FALSE	NA	NA	NA	NA	NA	none	15.34480833	1	1
ENSG00000005073.5	-	HOXA11	protein_coding	chr7	27182224	1	0	off	low	0	0	0.079094465	0	FALSE	8	ENSG00000005073.5;ENSG00000240990.10;ENSG00000273961.1;ENSG00000278334.1;ENSG00000276496.1;ENSG00000277966.1;ENSG00000278592.1;ENSG00000278020.1	HOXA11;HOXA11-AS;AC004080.7;AC004080.14;AC004080.8;AC004080.12;AC004080.15;AC004080.13	protein_coding;lncRNA;misc_RNA;misc_RNA;misc_RNA;misc_RNA;misc_RNA;misc_RNA	-;+;+;+;+;+;+;+	multiple_nearby_promoters	0.240678521	1	0
ENSG00000005075.15	-	POLR2J	protein_coding	chr7	102475908	0	51.12420682	expressed	low	0	72.87785322	98.02440744	0	FALSE	NA	NA	NA	NA	NA	none	50.5257106	0	0
ENSG00000005100.13	-	DHX33	protein_coding	chr17	5465983	29	5.347302837	expressed	low	0	4.266406145	5.747531152	0	FALSE	2	ENSG00000005100.13;ENSG00000262099.1	DHX33;DHX33-DT	protein_coding;lncRNA	-;+	bidirectional	0	0	1
ENSG00000005102.13	-	MEOX1	protein_coding	chr17	43658923	3	0	off	low	0	0.020726667	0.231042394	0	FALSE	NA	NA	NA	NA	NA	none	0.12033926	1	0
ENSG00000005108.16	-	THSD7A	protein_coding	chr7	11829199	0	0	off	low	0	0	0	0	FALSE	NA	NA	NA	NA	NA	none	0.361017781	0	0
ENSG00000005156.12	+	LIG3	protein_coding	chr17	34977512	63	6.742980205	expressed	low	0	12.9345488	18.7633701	0	FALSE	NA	NA	NA	NA	NA	none	0.354389771	0	1
ENSG00000005175.10	-	RPAP3	protein_coding	chr12	47703031	48	20.62247838	expressed	low	0	6.038133733	7.739920198	0	FALSE	2	ENSG00000005175.10;ENSG00000257433.6	RPAP3;AC004241.1	protein_coding;lncRNA	-;+	bidirectional	0	0	1
ENSG00000005187.12	+	ACSM3	protein_coding	chr16	20607243	1	37.61002798	expressed	low	0	0	0.011141244	0	FALSE	NA	NA	NA	NA	NA	none	0.240678521	1	0
ENSG00000005189.19	+	REXO5	protein_coding	chr16	20803429	59	16.44058996	expressed	low	0	19.51007822	33.30378223	0	FALSE	NA	NA	NA	NA	NA	none	94.76726761	0	1
ENSG00000005194.15	-	CIAPIN1	protein_coding	chr16	57444421	28	45.05986675	expressed	low	0	11.89379665	18.73690696	0	FALSE	2	ENSG00000005194.15;ENSG00000088682.14	CIAPIN1;COQ9	protein_coding;protein_coding	-;+	bidirectional	0	0	1
ENSG00000005206.17	+	SPPL2B	protein_coding	chr19	2325615	35	6.520643781	expressed	low	0	53.53032217	131.5688553	0	FALSE	2	ENSG00000130332.15;ENSG00000005206.17	LSM7;SPPL2B	protein_coding;protein_coding	-;+	bidirectional	0	0	1
ENSG00000005238.19	-	FAM214B	protein_coding	chr9	35113342	30	1.524136851	expressed	low	0	0.745749898	1.428504706	0	FALSE	NA	NA	NA	NA	NA	none	4.152222026	0	1
ENSG00000005243.10	-	COPZ2	protein_coding	chr17	48035031	5	0.063623609	expressed	low	0	0.10831454	0.239940794	0	FALSE	2	ENSG00000005243.10;ENSG00000207947.3	COPZ2;MIR152	protein_coding;miRNA	-;-	nearby_same_strand	2.828490161	0	0
ENSG00000005249.13	+	PRKAR2B	protein_coding	chr7	107041705	49	87.26639697	expressed	low	0	30.13250977	50.38317446	0	TRUE	NA	NA	NA	NA	NA	none	40.75068338	0	1
ENSG00000005302.19	+	MSL3	protein_coding	chrX	11755159	24	5.480232006	expressed	low	0	11.74437478	40.49017954	0	FALSE	2	ENSG00000282840.1;ENSG00000005302.19	AC004554.2;MSL3	lncRNA;protein_coding	-;+	bidirectional	0	0	1
ENSG00000005339.14	-	CREBBP	protein_coding	chr16	3877727	14	1.44594103	expressed	low	0	2.049884514	4.412096602	0	FALSE	NA	NA	NA	NA	NA	none	60.68723256	0	1
ENSG00000005379.17	-	TSPOAP1	protein_coding	chr17	58325796	73	1.038113196	expressed	low	0	26.24777458	43.28531926	0	TRUE	NA	NA	NA	NA	NA	none	570.1589004	0	1
ENSG00000005381.8	-	MPO	protein_coding	chr17	58277936	5	0.060221445	expressed	low	0	0.011141244	0.215224224	0	FALSE	NA	NA	NA	NA	NA	none	1.310475845	1	0
ENSG00000005421.9	-	PON1	protein_coding	chr7	95321533	0	0	off	low	0	0	0.012114996	0	FALSE	NA	NA	NA	NA	NA	none	0.361017781	1	0
ENSG00000005436.14	-	GCFC2	protein_coding	chr2	75707986	32	7.285994345	expressed	low	0	5.107071819	7.534140936	0	FALSE	NA	NA	NA	NA	NA	none	0.12033926	0	1
ENSG00000005448.16	+	WDR54	protein_coding	chr2	74418678	20	2.537380141	expressed	low	0	4.118748544	7.130395901	0	FALSE	3	ENSG00000159239.13;ENSG00000284308.1;ENSG00000005448.16	AC005041.1;C2orf81;WDR54	protein_coding;protein_coding;protein_coding	-;-;+	multiple_nearby_promoters	0	1	0
ENSG00000005469.11	+	CROT	protein_coding	chr7	87342681	19	3.087598538	expressed	low	0	3.456565778	5.614614583	0	FALSE	4	ENSG00000182165.18;ENSG00000273623.1;ENSG00000276185.1;ENSG00000005469.11	TP53TG1;AC005045.1;AC005045.2;CROT	lncRNA;misc_RNA;misc_RNA;protein_coding	-;+;+;+	multiple_nearby_promoters	0	0	1
ENSG00000005471.17	-	ABCB4	protein_coding	chr7	87477436	0	0.395999431	expressed	low	0	0	0.20726667	0	FALSE	NA	NA	NA	NA	NA	none	0.12033926	1	0
ENSG00000005483.21	+	KMT2E	protein_coding	chr7	105011190	102	7.961236147	expressed	low	0	13.78664663	38.15058627	0	TRUE	2	ENSG00000228393.4;ENSG00000005483.21	LINC01004;KMT2E	lncRNA;protein_coding	-;+	bidirectional	0	0	1
ENSG00000005486.17	+	RHBDD2	protein_coding	chr7	75839602	67	12.23376228	expressed	low	0	0.326226552	0.787613346	0	FALSE	NA	NA	NA	NA	NA	none	2.855002201	0	1
ENSG00000005513.10	+	SOX8	protein_coding	chr16	978770	3	0.00487638	expressed	low	0	0.076723723	0.211683628	0	FALSE	3	ENSG00000103227.18;ENSG00000260807.7;ENSG00000005513.10	LMF1;AC009041.2;SOX8	protein_coding;lncRNA;protein_coding	-;-;+	multiple_nearby_promoters	0.240678521	1	0
ENSG00000005700.15	-	IBTK	protein_coding	chr6	82244755	0	20.19611655	expressed	low	0	4.085438548	12.76762687	0	FALSE	NA	NA	NA	NA	NA	none	21.9160365	0	1
ENSG00000005801.18	-	ZNF195	protein_coding	chr11	3376223	44	10.12765844	expressed	low	0	12.72811496	20.97082541	0	FALSE	2	ENSG00000005801.18;ENSG00000223756.6	ZNF195;TSSC2	protein_coding;transcribed_unprocessed_pseudogene	-;+	bidirectional	29.77992665	0	1
ENSG00000005810.18	-	MYCBP2	protein_coding	chr13	77324095	32	9.320554656	expressed	low	0	1.216327699	3.983017183	0	FALSE	NA	NA	NA	NA	NA	none	26.80355011	0	1
ENSG00000005812.11	-	FBXL3	protein_coding	chr13	77024196	30	3.036194224	expressed	low	0	2.188480135	6.190472489	0	FALSE	2	ENSG00000005812.11;ENSG00000274898.1	FBXL3;AC001226.1	protein_coding;lncRNA	-;+	bidirectional	0	0	1
ENSG00000005844.18	+	ITGAL	protein_coding	chr16	30469719	6	0.058449154	expressed	low	0	0.026633925	0.095976318	0	FALSE	NA	NA	NA	NA	NA	none	0.361017781	0	0
ENSG00000005882.12	+	PDK2	protein_coding	chr17	50091737	11	0.157497166	expressed	low	0	0.472959917	0.746463321	0	FALSE	2	ENSG00000276851.1;ENSG00000005882.12	AC002401.4;PDK2	lncRNA;protein_coding	+;+	nearby_same_strand	0	1	0
ENSG00000005884.18	+	ITGA3	protein_coding	chr17	50052968	9	0.05601886	expressed	low	0	0.016711865	0.124217801	0	FALSE	2	ENSG00000246640.1;ENSG00000005884.18	PICART1;ITGA3	lncRNA;protein_coding	-;+	bidirectional	0	1	0
ENSG00000005889.15	+	ZFX	protein_coding	chrX	24146173	22	9.278626512	expressed	low	0	2.145890697	5.230709312	0	FALSE	NA	NA	NA	NA	NA	none	0.12033926	0	1
ENSG00000005893.15	-	LAMP2	protein_coding	chrX	120466366	32	36.1263532	expressed	low	0	13.23293992	20.29899118	0	FALSE	NA	NA	NA	NA	NA	none	9.775027217	0	1
ENSG00000005961.19	-	ITGA2B	protein_coding	chr17	44386650	35	8.258594612	expressed	low	0	3.664447779	9.117750177	0	FALSE	NA	NA	NA	NA	NA	none	16.66191218	0	1
ENSG00000005981.13	+	ASB4	protein_coding	chr7	95475444	6	0.035944712	expressed	low	0	0.005570622	0.186326701	0	FALSE	NA	NA	NA	NA	NA	none	0.595068292	0	0
ENSG00000006007.12	-	GDE1	protein_coding	chr16	19519124	61	22.60498627	expressed	low	0	13.91286199	16.80833416	0	FALSE	2	ENSG00000006007.12;ENSG00000103540.16	GDE1;CCP110	protein_coding;protein_coding	-;+	bidirectional	0.474729032	0	1
ENSG00000006015.17	+	REX1BD	protein_coding	chr19	18585685	42	13.42387853	expressed	low	0	20.3912676	32.12633384	0	FALSE	NA	NA	NA	NA	NA	none	95.34245188	0	1
ENSG00000006016.11	-	CRLF1	protein_coding	chr19	18604742	2	1.224815214	expressed	low	0	0	0.107612112	0	FALSE	NA	NA	NA	NA	NA	none	0.240678521	1	0
ENSG00000006025.12	-	OSBPL7	protein_coding	chr17	47818835	22	2.871472513	expressed	low	0	46.86821264	83.90470551	0	FALSE	NA	NA	NA	NA	NA	none	44.28132508	0	1
ENSG00000006042.12	+	TMEM98	protein_coding	chr17	32924910	28	12.54898561	expressed	low	0	4.752668613	10.68542637	0	FALSE	NA	NA	NA	NA	NA	none	21.3949114	0	1
ENSG00000006047.13	-	YBX2	protein_coding	chr17	7291640	0	0.041158199	expressed	low	0	0.077798322	0.188321196	0	FALSE	NA	NA	NA	NA	NA	none	19.67598662	0	0
ENSG00000006059.4	-	KRT33A	protein_coding	chr17	41347829	0	0	off	low	0	0	0	0	FALSE	NA	NA	NA	NA	NA	none	0.12033926	0	0
ENSG00000006062.17	-	MAP3K14	protein_coding	chr17	45314030	0	1.45526502	expressed	low	0	0.813407337	3.311182959	0	FALSE	NA	NA	NA	NA	NA	none	22.59167599	0	1
ENSG00000006071.14	-	ABCC8	protein_coding	chr11	17473880	3	0.007184185	expressed	low	0	0	0.012114996	0	FALSE	NA	NA	NA	NA	NA	none	0.12033926	1	0
ENSG00000006116.3	+	CACNG3	protein_coding	chr16	24252553	14	0	off	low	1	0	0.024229992	1	FALSE	NA	NA	NA	NA	NA	none	2.888142251	1	0
ENSG00000006118.14	+	TMEM132A	protein_coding	chr11	60921463	8	0.022323819	expressed	low	0	24.9095188	49.67132427	0	FALSE	NA	NA	NA	NA	NA	none	6.679346495	1	0
ENSG00000006125.18	+	AP2B1	protein_coding	chr17	35575046	48	36.79776373	expressed	low	0	11.91617531	16.97310923	0	FALSE	NA	NA	NA	NA	NA	none	2.132966638	0	1
ENSG00000006128.12	+	TAC1	protein_coding	chr7	97729084	4	0.012732136	expressed	low	0	0.020726667	1.987484808	0	FALSE	NA	NA	NA	NA	NA	none	0.722035563	1	0
ENSG00000006194.10	+	ZNF263	protein_coding	chr16	3260800	60	12.59251622	expressed	low	0	1.868432426	5.038756677	0	FALSE	2	ENSG00000281005.1;ENSG00000006194.10	LINC00921;ZNF263	lncRNA;protein_coding	+;+	nearby_same_strand	0	0	1
ENSG00000006210.7	+	CX3CL1	protein_coding	chr16	57369477	0	0	off	low	0	0	0.041453334	0	FALSE	NA	NA	NA	NA	NA	none	1.203392604	1	0
ENSG00000006282.21	+	SPATA20	protein_coding	chr17	50540058	12	0.866088966	expressed	low	0	0.103694377	0.188321196	0	FALSE	NA	NA	NA	NA	NA	none	14.42849031	0	1
ENSG00000006283.18	+	CACNA1G	protein_coding	chr17	50557715	10	0.002488797	expressed	low	0	0	0.041453334	0	FALSE	NA	NA	NA	NA	NA	none	0.481357042	1	0
ENSG00000006327.13	+	TNFRSF12A	protein_coding	chr16	3015445	50	15.26445551	expressed	low	0	5.763486209	8.82956014	0	FALSE	NA	NA	NA	NA	NA	none	0.474729032	0	1
ENSG00000006377.11	+	DLX6	protein_coding	chr7	97002553	1	0	off	low	0	0	0	0	FALSE	NA	NA	NA	NA	NA	none	0.842374823	1	0
ENSG00000006432.15	-	MAP3K9	protein_coding	chr14	70806535	8	0.280031115	expressed	low	0	0.99576379	1.370970733	0	FALSE	2	ENSG00000006432.15;ENSG00000259153.2	MAP3K9;AC004816.1	protein_coding;lncRNA	-;+	bidirectional	0	0	0
ENSG00000006451.8	+	RALA	protein_coding	chr7	39620565	66	7.395664101	expressed	low	0	4.300848673	8.410378154	0	FALSE	2	ENSG00000287584.1;ENSG00000006451.8	AC004837.4;RALA	lncRNA;protein_coding	-;+	bidirectional	1.176880565	0	1
ENSG00000006453.14	-	BAIAP2L1	protein_coding	chr7	98398091	28	4.726104355	expressed	low	0	1.864824893	4.654223855	0	FALSE	NA	NA	NA	NA	NA	none	10.80505648	1	1
ENSG00000006459.11	-	KDM7A	protein_coding	chr7	140173984	55	5.533807744	expressed	low	0	11.1886704	13.72629033	0	FALSE	2	ENSG00000006459.11;ENSG00000260231.2	KDM7A;KDM7A-DT	protein_coding;lncRNA	-;+	bidirectional	0	0	1
ENSG00000006468.14	-	ETV1	protein_coding	chr7	13988426	62	5.559463661	expressed	low	0	4.683043454	9.549643606	0	FALSE	NA	NA	NA	NA	NA	none	30.74926875	0	1
ENSG00000006530.18	+	AGK	protein_coding	chr7	141548278	33	8.751042483	expressed	low	0	3.965351401	11.92115595	0	FALSE	NA	NA	NA	NA	NA	none	0.234050511	0	1
ENSG00000006534.16	+	ALDH3B1	protein_coding	chr11	68005578	52	0.10652584	expressed	low	0	0.064478181	0.191952635	0	FALSE	NA	NA	NA	NA	NA	none	2.74791896	0	1
ENSG00000006555.11	-	TTC22	protein_coding	chr1	54798324	10	0.007664816	expressed	low	0	0.017685618	0.143964476	0	FALSE	NA	NA	NA	NA	NA	none	0.354389771	1	0
ENSG00000006576.16	+	PHTF2	protein_coding	chr7	77795792	60	8.684771382	expressed	low	0	11.12173628	18.66739378	0	FALSE	2	ENSG00000135211.6;ENSG00000006576.16	TMEM60;PHTF2	protein_coding;protein_coding	-;+	bidirectional	1.892288117	0	1
ENSG00000006606.8	-	CCL26	protein_coding	chr7	75786897	9	4.633671481	expressed	low	0	0.18466258	2.717205834	0	FALSE	NA	NA	NA	NA	NA	none	3.570409753	0	0
ENSG00000006607.14	+	FARP2	protein_coding	chr2	241353285	16	3.754093958	expressed	low	0	56.59977365	82.36985699	0	FALSE	NA	NA	NA	NA	NA	none	23.70786939	0	1
ENSG00000006611.16	-	USH1C	protein_coding	chr11	17541417	3	0.004444824	expressed	low	0	0.013451514	0.082906668	0	FALSE	NA	NA	NA	NA	NA	none	0.481357042	1	0
ENSG00000006625.18	-	GGCT	protein_coding	chr7	30501842	43	46.30089298	expressed	low	0	23.58050386	43.28531926	0	FALSE	NA	NA	NA	NA	NA	none	58.17439919	0	1
ENSG00000006634.8	+	DBF4	protein_coding	chr7	87873216	60	37.38460235	expressed	low	0	22.89485254	57.03978757	0	FALSE	NA	NA	NA	NA	NA	none	0.12033926	0	1
ENSG00000006638.11	-	TBXA2R	protein_coding	chr19	3603841	57	3.393781624	expressed	low	0	3.724896652	8.463107797	0	FALSE	2	ENSG00000006638.11;ENSG00000226800.5	TBXA2R;CACTIN-AS1	protein_coding;lncRNA	-;+	bidirectional	0.12033926	0	1
ENSG00000006652.14	+	IFRD1	protein_coding	chr7	112419968	16	28.4200818	expressed	low	0	0.28709636	0.787613346	0	FALSE	NA	NA	NA	NA	NA	none	0.595068292	0	1
ENSG00000006659.13	+	LGALS14	protein_coding	chr19	39701481	1	0	off	low	0	0	0.026903028	0	FALSE	NA	NA	NA	NA	NA	none	0.601696302	1	0
ENSG00000006695.12	+	COX10	protein_coding	chr17	14066490	42	4.906271741	expressed	low	0	3.855735684	7.77408173	0	FALSE	NA	NA	NA	NA	NA	none	0	0	1
ENSG00000006704.10	+	GTF2IRD1	protein_coding	chr7	74450790	35	3.247958045	expressed	low	0	1.368111676	3.551199704	0	FALSE	NA	NA	NA	NA	NA	none	31.22399778	0	1
ENSG00000006712.15	-	PAF1	protein_coding	chr19	39388155	43	17.15750093	expressed	low	0	41.43525547	81.15364088	0	FALSE	2	ENSG00000006712.15;ENSG00000063322.15	PAF1;MED29	protein_coding;protein_coding	-;+	bidirectional	2.72803493	0	1
ENSG00000006715.16	-	VPS41	protein_coding	chr7	38929395	11	16.87021438	expressed	low	0	0.086018308	0.161418168	0	FALSE	NA	NA	NA	NA	NA	none	0.481357042	1	0
ENSG00000006740.17	+	ARHGAP44	protein_coding	chr17	12786498	2	0.075967443	expressed	low	0	0.038044272	0.143964476	0	FALSE	NA	NA	NA	NA	NA	none	0	1	0
ENSG00000006744.19	-	ELAC2	protein_coding	chr17	13015066	41	19.32837791	expressed	low	0	15.92506621	24.09005573	0	FALSE	NA	NA	NA	NA	NA	none	20.45208135	0	1
ENSG00000006747.15	+	SCIN	protein_coding	chr7	12567577	5	0.651518608	expressed	low	0	0.068714826	0.807415703	0	FALSE	NA	NA	NA	NA	NA	none	0	0	0
ENSG00000006756.16	-	ARSD	protein_coding	chrX	2926350	2	0.163894554	expressed	low	0	0	0.079094465	0	FALSE	NA	NA	NA	NA	NA	none	0.354389771	0	0
ENSG00000006757.12	-	PNPLA4	protein_coding	chrX	7924740	47	5.995300746	expressed	low	0	8.171986071	13.0527792	0	FALSE	2	ENSG00000006757.12;ENSG00000285679.2	PNPLA4;AC079142.1	protein_coding;lncRNA	-;+	bidirectional	0.474729032	0	1
ENSG00000006788.14	-	MYH13	protein_coding	chr17	10370131	3	0.212708623	expressed	low	0	0.050897107	0.20726667	0	FALSE	NA	NA	NA	NA	NA	none	0.601696302	0	0
ENSG00000006831.10	+	ADIPOR2	protein_coding	chr12	1685574	0	18.89373256	expressed	low	0	3.508816851	5.879355261	0	FALSE	NA	NA	NA	NA	NA	none	34.2391073	0	1
ENSG00000006837.12	-	CDKL3	protein_coding	chr5	134368048	51	0.427237729	expressed	low	0	6.008703233	9.016769055	0	FALSE	3	ENSG00000273345.5;ENSG00000006837.12;ENSG00000119048.8	AC104109.4;CDKL3;UBE2B	lncRNA;protein_coding;protein_coding	-;-;+	multiple_nearby_promoters	0	0	1
ENSG00000007001.12	+	UPP2	protein_coding	chr2	157873702	36	0.200746795	expressed	low	0	3.134604502	4.462898771	0	FALSE	3	ENSG00000115170.14;ENSG00000007001.12;ENSG00000270557.1	ACVR1;UPP2;AC013731.1	protein_coding;protein_coding;lncRNA	-;+;+	multiple_nearby_promoters	0	0	1
ENSG00000007038.11	+	PRSS21	protein_coding	chr16	2814180	24	27.56628025	expressed	low	0	50.87032884	80.87428725	0	FALSE	NA	NA	NA	NA	NA	none	37.47501131	0	1
ENSG00000007047.15	+	MARK4	protein_coding	chr19	45076288	45	1.181351182	expressed	low	0	8.456038702	10.99413069	0	FALSE	2	ENSG00000142252.11;ENSG00000007047.15	GEMIN7;MARK4	protein_coding;protein_coding	+;+	nearby_same_strand	0.595068292	0	1
ENSG00000007062.11	-	PROM1	protein_coding	chr4	16081379	0	0.00586425	expressed	low	0	0	0.026903028	0	FALSE	NA	NA	NA	NA	NA	none	0.361017781	1	0
ENSG00000007080.11	+	CCDC124	protein_coding	chr19	17930015	40	14.93250507	expressed	low	0	10.91721819	15.17192024	0	FALSE	NA	NA	NA	NA	NA	none	58.48239289	0	1
ENSG00000007129.18	+	CEACAM21	protein_coding	chr19	41546518	0	0.47102715	expressed	low	0	0.150037475	0.496871202	0	FALSE	NA	NA	NA	NA	NA	none	0	1	0
ENSG00000007168.13	+	PAFAH1B1	protein_coding	chr17	2590210	25	14.8130632	expressed	low	0	3.380408135	7.830352074	0	FALSE	NA	NA	NA	NA	NA	none	61.84422909	0	1
ENSG00000007171.18	-	NOS2	protein_coding	chr17	27797530	1	0	off	low	0	0	0.026903028	0	FALSE	NA	NA	NA	NA	NA	none	0.12033926	1	0
ENSG00000007174.18	+	DNAH9	protein_coding	chr17	11595470	4	0.001478205	expressed	low	0	0	0	0	FALSE	NA	NA	NA	NA	NA	none	0.722035563	0	0
ENSG00000007202.15	-	KIAA0100	protein_coding	chr17	28642455	57	43.37226168	expressed	low	0	29.2168738	40.74862731	0	FALSE	NA	NA	NA	NA	NA	none	89.25713859	0	1
ENSG00000007216.14	+	SLC13A2	protein_coding	chr17	28470293	9	0	off	low	1	0	0.011141244	1	FALSE	NA	NA	NA	NA	NA	none	0.12033926	1	0
ENSG00000007237.18	-	GAS7	protein_coding	chr17	10195552	0	0.023187966	expressed	low	0	0	0.041453334	0	FALSE	NA	NA	NA	NA	NA	none	1.437443115	0	0
ENSG00000007255.10	-	TRAPPC6A	protein_coding	chr19	45175238	52	14.01474137	expressed	low	0	12.79128684	20.45910172	0	FALSE	2	ENSG00000007255.10;ENSG00000189114.7	TRAPPC6A;BLOC1S3	protein_coding;protein_coding	-;+	bidirectional	1.196764594	0	1
ENSG00000007264.15	-	MATK	protein_coding	chr19	3799130	9	9.888949927	expressed	low	0	0.072218151	0.237283396	0	FALSE	NA	NA	NA	NA	NA	none	1.317103855	1	0
ENSG00000007306.15	-	CEACAM7	protein_coding	chr19	41703977	9	0	off	low	1	0	0.095976318	1	FALSE	3	ENSG00000007306.15;ENSG00000105388.15;ENSG00000267881.2	CEACAM7;CEACAM5;AC243967.1	protein_coding;protein_coding;protein_coding	-;+;+	multiple_nearby_promoters	0.12033926	0	0
ENSG00000007312.12	-	CD79B	protein_coding	chr17	63929355	1	0.07491672	expressed	low	0	0.072970963	0.186326701	0	FALSE	2	ENSG00000285947.1;ENSG00000007312.12	AC127029.3;CD79B	protein_coding;protein_coding	-;-	nearby_same_strand	0	1	0
ENSG00000007314.12	-	SCN4A	protein_coding	chr17	63969919	1	0.528459449	expressed	low	0	0.384551478	0.896403941	0	FALSE	NA	NA	NA	NA	NA	none	1.430815105	1	0
ENSG00000007341.19	-	ST7L	protein_coding	chr1	112617826	65	4.217076671	expressed	low	0	40.33970936	69.10270776	0	TRUE	NA	NA	NA	NA	NA	none	10.18347615	0	1
ENSG00000007350.17	+	TKTL1	protein_coding	chrX	154292795	5	0.054976879	expressed	low	0	0.055783327	0.558980102	0	FALSE	NA	NA	NA	NA	NA	none	0	0	0
ENSG00000007372.23	-	PAX6	protein_coding	chr11	31814962	16	0.632284565	expressed	low	0	0.221334819	1.180069105	0	FALSE	NA	NA	NA	NA	NA	none	5.797203612	1	0
ENSG00000007376.8	-	RPUSD1	protein_coding	chr16	785398	28	15.01792236	expressed	low	0	53.22568718	70.19000021	0	FALSE	NA	NA	NA	NA	NA	none	3.342987252	0	1
ENSG00000007384.15	-	RHBDF1	protein_coding	chr16	73356	43	0.955456929	expressed	low	0	7.050284033	12.66887393	0	FALSE	2	ENSG00000007384.15;ENSG00000103152.11	RHBDF1;MPG	protein_coding;protein_coding	-;+	bidirectional	0.942830054	0	1
ENSG00000007392.16	-	LUC7L	protein_coding	chr16	226464	32	14.98058683	expressed	low	0	28.51308111	47.43941523	0	FALSE	2	ENSG00000007392.16;ENSG00000206168.1	LUC7L;Z69890.1	protein_coding;processed_pseudogene	-;+	bidirectional	53.14666229	0	1
ENSG00000007402.11	-	CACNA2D2	protein_coding	chr3	50501245	0	0.06425965	expressed	low	0	0.012114996	0.0621089	0	FALSE	NA	NA	NA	NA	NA	none	1.083053344	1	0
ENSG00000007516.13	+	BAIAP3	protein_coding	chr16	1330601	27	1.305561055	expressed	low	0	0.446171765	1.160693352	0	FALSE	NA	NA	NA	NA	NA	none	12.81002077	1	1
ENSG00000007520.4	-	TSR3	protein_coding	chr16	1348879	22	28.14876763	expressed	low	0	41.64875969	47.04953408	0	FALSE	2	ENSG00000007520.4;ENSG00000090581.10	TSR3;GNPTG	protein_coding;protein_coding	-;+	bidirectional	0.481357042	0	1
ENSG00000007541.16	+	PIGQ	protein_coding	chr16	563995	36	3.893386774	expressed	low	0	5.796687042	8.249213464	0	FALSE	2	ENSG00000007541.16;ENSG00000257108.2	PIGQ;NHLRC4	protein_coding;protein_coding	+;+	nearby_same_strand	0	0	1
ENSG00000007545.15	+	CRAMP1	protein_coding	chr16	1609325	47	1.989683768	expressed	low	0	3.49155463	6.779563072	0	FALSE	2	ENSG00000187535.14;ENSG00000007545.15	IFT140;CRAMP1	protein_coding;protein_coding	-;+	bidirectional	0.474729032	0	1
ENSG00000007866.21	-	TEAD3	protein_coding	chr6	35494080	44	3.005090835	expressed	low	0	1.842472915	3.855160061	0	FALSE	NA	NA	NA	NA	NA	none	108.4604663	0	1
ENSG00000007908.16	-	SELE	protein_coding	chr1	169761706	1	0.010213626	expressed	low	0	0	0	0	FALSE	2	ENSG00000007908.16;ENSG00000230704.1	SELE;AL021940.1	protein_coding;lncRNA	-;-	nearby_same_strand	0	0	0
ENSG00000007923.16	-	DNAJC11	protein_coding	chr1	6698925	52	23.49265105	expressed	low	0	9.62767917	19.09928721	0	FALSE	NA	NA	NA	NA	NA	none	61.08905348	0	1
ENSG00000007933.13	+	FMO3	protein_coding	chr1	171087901	0	0.006338301	expressed	low	0	0	0	0	FALSE	NA	NA	NA	NA	NA	none	0.240678521	0	0
ENSG00000007944.15	+	MYLIP	protein_coding	chr6	16126086	70	19.70843902	expressed	low	0	17.88959077	30.21948048	0	FALSE	NA	NA	NA	NA	NA	none	261.5162619	0	1
ENSG00000007952.18	-	NOX1	protein_coding	chrX	100871360	0	0.107962419	expressed	low	0	0	0.080709084	0	FALSE	NA	NA	NA	NA	NA	none	0.240678521	0	0
ENSG00000007968.7	-	E2F2	protein_coding	chr1	23528234	0	9.571355121	expressed	low	0	4.409130559	9.782986822	0	FALSE	NA	NA	NA	NA	NA	none	48.55388636	0	1
ENSG00000008018.9	-	PSMB1	protein_coding	chr6	170550308	56	263.8281952	expressed	low	0	105.0361175	170.9950027	0	TRUE	2	ENSG00000008018.9;ENSG00000112592.14	PSMB1;TBP	protein_coding;protein_coding	-;+	bidirectional	5.23527537	0	1
ENSG00000008056.14	-	SYN1	protein_coding	chrX	47616858	19	0.048451393	expressed	low	0	0.086018308	0.269030281	0	FALSE	NA	NA	NA	NA	NA	none	5.896623762	1	0
ENSG00000008083.14	+	JARID2	protein_coding	chr6	15243069	68	16.97083903	expressed	low	0	10.62699629	17.56366613	0	FALSE	2	ENSG00000271888.1;ENSG00000008083.14	AL136162.1;JARID2	lncRNA;protein_coding	-;+	bidirectional	0	0	1
ENSG00000008086.12	+	CDKL5	protein_coding	chrX	18422583	11	0.020771673	expressed	low	0	0.006057498	0.095976318	0	FALSE	NA	NA	NA	NA	NA	none	1.203392604	1	0
ENSG00000008118.10	+	CAMK1G	protein_coding	chr1	209580714	0	0.006549705	expressed	low	0	0	0.026364822	0	FALSE	NA	NA	NA	NA	NA	none	0.962714084	1	0
ENSG00000008128.23	-	CDK11A	protein_coding	chr1	1721358	57	3.304237582	expressed	low	0	25.22562569	45.45759101	0	FALSE	2	ENSG00000008128.23;ENSG00000227775.3	CDK11A;AL031282.1	protein_coding;transcribed_processed_pseudogene	-;+	bidirectional	71.28019272	0	1
ENSG00000008130.15	-	NADK	protein_coding	chr1	1777458	54	28.77648491	expressed	low	0	5.030541395	11.2185627	0	FALSE	NA	NA	NA	NA	NA	none	233.2839669	0	1
ENSG00000008196.13	+	TFAP2B	protein_coding	chr6	50815723	14	0	off	low	1	0	0.0621089	1	FALSE	NA	NA	NA	NA	NA	none	0.12033926	0	1
ENSG00000008197.4	+	TFAP2D	protein_coding	chr6	50710828	0	0	off	low	0	0	0	0	FALSE	NA	NA	NA	NA	NA	none	0.234050511	1	0
ENSG00000008226.20	+	DLEC1	protein_coding	chr3	38036205	8	0.211244385	expressed	low	0	0.02556651	0.095976318	0	FALSE	NA	NA	NA	NA	NA	none	0.949458064	1	0
ENSG00000008256.16	-	CYTH3	protein_coding	chr7	6269645	22	6.297256519	expressed	low	0	1.484742963	4.223405217	0	FALSE	NA	NA	NA	NA	NA	none	37.99510133	0	1
ENSG00000008277.14	+	ADAM22	protein_coding	chr7	87931143	3	0.152787365	expressed	low	0	0.178917774	0.331626672	0	FALSE	NA	NA	NA	NA	NA	none	3.102308732	1	0
ENSG00000008282.8	-	SYPL1	protein_coding	chr7	106109577	42	29.45206852	expressed	low	0	15.44214025	22.96375979	0	FALSE	NA	NA	NA	NA	NA	none	45.16346796	0	1
ENSG00000008283.16	-	CYB561	protein_coding	chr17	63443355	44	10.98488668	expressed	low	0	3.298664369	4.455654884	0	TRUE	NA	NA	NA	NA	NA	none	76.92950995	0	1
ENSG00000008294.21	-	SPAG9	protein_coding	chr17	51117869	70	29.68003627	expressed	low	0	17.53632608	23.33822704	0	FALSE	NA	NA	NA	NA	NA	none	49.20197873	0	1
ENSG00000008300.17	-	CELSR3	protein_coding	chr3	48659887	41	0.519344885	expressed	low	0	2.94177885	4.462898771	0	FALSE	2	ENSG00000008300.17;ENSG00000228350.1	CELSR3;LINC02585	protein_coding;lncRNA	-;+	bidirectional	2.286445948	0	1
ENSG00000008311.15	-	AASS	protein_coding	chr7	122141256	2	0.033683056	expressed	low	0	0	0.0621089	0	FALSE	2	ENSG00000008311.15;ENSG00000234418.2	AASS;AC015983.2	protein_coding;lncRNA	-;+	bidirectional	0.240678521	0	0
ENSG00000008323.15	+	PLEKHG6	protein_coding	chr12	6307436	8	0.083606799	expressed	low	0	0.026903028	0.095976318	0	FALSE	NA	NA	NA	NA	NA	none	0.595068292	0	0
ENSG00000008324.11	+	SS18L2	protein_coding	chr3	42578840	52	35.21542162	expressed	low	0	10.37605057	15.33773358	0	FALSE	NA	NA	NA	NA	NA	none	55.62076268	0	1
ENSG00000008382.15	+	MPND	protein_coding	chr19	4340527	43	2.710812133	expressed	low	0	3.2795699	5.718299251	0	FALSE	2	ENSG00000178078.11;ENSG00000008382.15	STAP2;MPND	protein_coding;protein_coding	-;+	bidirectional	2.273189928	0	1
ENSG00000008394.13	+	MGST1	protein_coding	chr12	16344142	28	1.787290325	expressed	low	0	3.769373135	6.707028644	0	FALSE	NA	NA	NA	NA	NA	none	7.755771829	0	1
ENSG00000008405.12	-	CRY1	protein_coding	chr12	107090550	51	12.76281248	expressed	low	0	11.20846713	16.00098692	0	FALSE	NA	NA	NA	NA	NA	none	0	0	1
ENSG00000008438.5	-	PGLYRP1	protein_coding	chr19	46020054	6	0.723152178	expressed	low	0	1.608538587	3.040042171	0	FALSE	NA	NA	NA	NA	NA	none	19.81165206	0	0
ENSG00000008441.16	+	NFIX	protein_coding	chr19	12992608	28	2.789778165	expressed	low	0	0.738277628	2.030091278	0	FALSE	NA	NA	NA	NA	NA	none	14.82264815	0	1
ENSG00000008513.16	-	ST3GAL1	protein_coding	chr8	133568941	34	3.993192748	expressed	low	0	3.489313269	6.190472489	0	FALSE	2	ENSG00000008513.16;ENSG00000261220.2	ST3GAL1;AC103706.1	protein_coding;lncRNA	-;+	bidirectional	2.032511408	1	1
ENSG00000008516.17	+	MMP25	protein_coding	chr16	3043561	13	0.042597516	expressed	low	0	0.123312448	0.474566792	0	FALSE	NA	NA	NA	NA	NA	none	6.064394173	1	0
ENSG00000008517.16	+	IL32	protein_coding	chr16	3062297	19	0.090611627	expressed	low	0	0.178166058	7.20463243	0	FALSE	NA	NA	NA	NA	NA	none	1.183508574	0	0
ENSG00000008710.19	-	PKD1	protein_coding	chr16	2132899	20	7.400294228	expressed	low	0	5.784350363	11.07322516	0	FALSE	2	ENSG00000008710.19;ENSG00000264397.1	PKD1;MIR3180-5	protein_coding;miRNA	-;-	nearby_same_strand	33.87705444	0	0
ENSG00000008735.14	+	MAPK8IP2	protein_coding	chr22	50597793	8	0.062444002	expressed	low	0	0.137894293	0.248720004	0	FALSE	NA	NA	NA	NA	NA	none	0	1	0
ENSG00000008838.20	-	MED24	protein_coding	chr17	40058216	14	14.99539164	expressed	low	0	0.32982035	2.528884638	0	FALSE	NA	NA	NA	NA	NA	none	16.86841557	0	1
ENSG00000008853.16	+	RHOBTB2	protein_coding	chr8	22984417	5	0.53719973	expressed	low	0	0	0.026903028	0	FALSE	NA	NA	NA	NA	NA	none	0.240678521	1	0
ENSG00000008869.12	-	HEATR5B	protein_coding	chr2	37081373	32	12.30967316	expressed	low	0	4.137207802	9.693608083	0	FALSE	2	ENSG00000008869.12;ENSG00000152133.14	HEATR5B;GPATCH11	protein_coding;protein_coding	-;+	bidirectional	0	0	1
ENSG00000008952.17	+	SEC62	protein_coding	chr3	169963635	46	11.09975695	expressed	low	0	6.377098443	9.981537036	0	FALSE	NA	NA	NA	NA	NA	none	0.12033926	0	1
ENSG00000008988.9	-	RPS20	protein_coding	chr8	56071582	57	584.4932003	expressed	low	0	756.4571747	1695.109734	0	FALSE	3	ENSG00000008988.9;ENSG00000238650.1;ENSG00000253603.1	RPS20;SNORD54;CERNA3	protein_coding;snoRNA;lncRNA	-;-;+	multiple_nearby_promoters	0.936202044	0	1
ENSG00000009307.16	-	CSDE1	protein_coding	chr1	114755677	47	221.6818152	expressed	low	0	24.66435362	47.94017067	0	FALSE	NA	NA	NA	NA	NA	none	45.40414648	0	1
ENSG00000009335.18	+	UBE3C	protein_coding	chr7	157135916	43	29.3256385	expressed	low	0	8.251859636	16.41552026	0	FALSE	NA	NA	NA	NA	NA	none	122.6716849	0	1
ENSG00000009413.15	-	REV3L	protein_coding	chr6	111480716	63	6.23571584	expressed	low	0	3.425450635	10.26946599	0	FALSE	NA	NA	NA	NA	NA	none	0	0	1
ENSG00000009694.13	-	TENM1	protein_coding	chrX	124960818	4	3.824753991	expressed	low	0	2.167742132	4.347623018	0	FALSE	NA	NA	NA	NA	NA	none	3.202763962	0	0
ENSG00000009709.12	+	PAX7	protein_coding	chr1	18627846	0	0	off	low	0	0	0	0	FALSE	NA	NA	NA	NA	NA	none	0.240678521	1	0
ENSG00000009724.17	-	MASP2	protein_coding	chr1	11044240	7	0.556031668	expressed	low	0	0.116768074	0.188321196	0	FALSE	NA	NA	NA	NA	NA	none	2.159478678	1	0
ENSG00000009765.14	+	IYD	protein_coding	chr6	150365892	1	0	off	low	0	0	0.011141244	0	FALSE	NA	NA	NA	NA	NA	none	0.595068292	1	0
ENSG00000009780.15	+	FAM76A	protein_coding	chr1	27722979	24	6.683590586	expressed	low	0	1.729167047	3.730800059	0	FALSE	2	ENSG00000287244.1;ENSG00000009780.15	AL020997.5;FAM76A	lncRNA;protein_coding	-;+	bidirectional	0.715407553	0	1
ENSG00000009790.15	+	TRAF3IP3	protein_coding	chr1	209753032	0	0.20153988	expressed	low	0	0.013182411	0.186326701	0	FALSE	NA	NA	NA	NA	NA	none	0.595068292	1	0
ENSG00000009830.11	-	POMT2	protein_coding	chr14	77317885	27	2.118570219	expressed	low	0	3.239463576	9.261714653	0	FALSE	2	ENSG00000009830.11;ENSG00000100577.19	POMT2;GSTZ1	protein_coding;protein_coding	-;+	bidirectional	0	0	1
ENSG00000009844.16	+	VTA1	protein_coding	chr6	142144162	45	11.56804236	expressed	low	0	11.50926723	31.30624438	0	FALSE	NA	NA	NA	NA	NA	none	7.354985988	0	1
ENSG00000009950.16	-	MLXIPL	protein_coding	chr7	73621544	25	1.564648789	expressed	low	0	1.773614987	4.658167519	0	FALSE	NA	NA	NA	NA	NA	none	29.45204892	1	1
ENSG00000009954.11	-	BAZ1B	protein_coding	chr7	73519294	65	56.13422087	expressed	low	0	9.437293599	17.78290155	0	FALSE	NA	NA	NA	NA	NA	none	81.39324844	0	1
ENSG00000010017.13	-	RANBP9	protein_coding	chr6	13708836	59	45.87437357	expressed	low	0	15.32043792	32.74510867	0	FALSE	NA	NA	NA	NA	NA	none	99.64504797	0	1
ENSG00000010030.14	-	ETV7	protein_coding	chr6	36384801	3	0.009181726	expressed	low	0	0.005570622	0.041453334	0	FALSE	NA	NA	NA	NA	NA	none	0	1	0
ENSG00000010072.16	+	SPRTN	protein_coding	chr1	231334104	32	8.856675235	expressed	low	0	27.1842297	52.06715233	0	FALSE	NA	NA	NA	NA	NA	none	1.664865616	0	1
ENSG00000010165.20	+	EEF1AKNMT	protein_coding	chr1	171778660	59	26.04975933	expressed	low	0	36.61223128	56.95195011	0	FALSE	NA	NA	NA	NA	NA	none	23.56101809	0	1
ENSG00000010219.13	+	DYRK4	protein_coding	chr12	4559204	12	1.265970605	expressed	low	0	4.751353533	37.48379725	0	FALSE	NA	NA	NA	NA	NA	none	17.55068308	0	1
ENSG00000010244.18	+	ZNF207	protein_coding	chr17	32347117	62	25.56534887	expressed	low	0	62.92792729	112.4021247	0	TRUE	3	ENSG00000108666.10;ENSG00000283774.1;ENSG00000010244.18	C17orf75;MIR632;ZNF207	protein_coding;miRNA;protein_coding	-;+;+	multiple_nearby_promoters	1.671493626	0	1
ENSG00000010256.11	-	UQCRC1	protein_coding	chr3	48607977	24	80.07179959	expressed	low	0	31.32362779	86.92970073	0	FALSE	NA	NA	NA	NA	NA	none	28.53469583	0	1
ENSG00000010270.13	+	STARD3NL	protein_coding	chr7	38175222	42	16.81619846	expressed	low	0	7.084767621	12.24422671	0	FALSE	NA	NA	NA	NA	NA	none	13.71308276	0	1
ENSG00000010278.14	+	CD9	protein_coding	chr12	6196715	6	0.100435141	expressed	low	0	0.146352036	1.225536795	0	FALSE	NA	NA	NA	NA	NA	none	1.557782376	1	0
ENSG00000010282.15	-	HHATL	protein_coding	chr3	42699825	3	0.038861476	expressed	low	0	0.005570622	0.0621089	0	FALSE	NA	NA	NA	NA	NA	none	0	1	0
ENSG00000010292.13	+	NCAPD2	protein_coding	chr12	6490356	38	34.76922171	expressed	low	0	99.97970716	203.4328279	0	FALSE	NA	NA	NA	NA	NA	none	2.039139418	0	1
ENSG00000010295.19	-	IFFO1	protein_coding	chr12	6553084	15	0.10865292	expressed	low	0	29.16792723	41.26367597	0	FALSE	NA	NA	NA	NA	NA	none	52.00395685	0	0
ENSG00000010310.9	+	GIPR	protein_coding	chr19	45665221	52	6.41680476	expressed	low	0	7.003793652	8.953920142	0	FALSE	NA	NA	NA	NA	NA	none	33.4905597	0	1
ENSG00000010318.21	+	PHF7	protein_coding	chr3	52407660	24	5.265967961	expressed	low	0	29.42168607	44.34575478	0	FALSE	2	ENSG00000163930.10;ENSG00000010318.21	BAP1;PHF7	protein_coding;protein_coding	-;+	bidirectional	1.684749646	0	1
ENSG00000010319.7	-	SEMA3G	protein_coding	chr3	52442104	5	0.037122798	expressed	low	0	0.013182411	0.082906668	0	FALSE	NA	NA	NA	NA	NA	none	1.678121636	0	1
ENSG00000010322.16	+	NISCH	protein_coding	chr3	52452118	36	8.223324546	expressed	low	0	4.254141781	5.313975061	0	FALSE	2	ENSG00000114854.8;ENSG00000010322.16	TNNC1;NISCH	protein_coding;protein_coding	-;+	bidirectional	1.196764594	0	1
ENSG00000010327.10	+	STAB1	protein_coding	chr3	52492338	6	0.350096834	expressed	low	0	9.125067425	15.47518735	0	FALSE	NA	NA	NA	NA	NA	none	25.26668684	0	0
ENSG00000010361.14	-	FUZ	protein_coding	chr19	49814377	39	2.34046508	expressed	low	0	5.954970671	13.53222312	0	FALSE	2	ENSG00000010361.14;ENSG00000104973.18	FUZ;MED25	protein_coding;protein_coding	-;+	bidirectional	0.12033926	0	1
ENSG00000010379.16	-	SLC6A13	protein_coding	chr12	259874	9	0.068529982	expressed	low	0	0.187323949	0.290173338	0	FALSE	NA	NA	NA	NA	NA	none	2.266561918	1	0
ENSG00000010404.18	-	IDS	protein_coding	chrX	149518097	3	0.562208362	expressed	low	0	0.646616565	1.247692129	0	FALSE	NA	NA	NA	NA	NA	none	2.74791896	0	0
ENSG00000010438.16	+	PRSS3	protein_coding	chr9	33747466	4	0.01309941	expressed	low	0	0.042331813	0.186326701	0	FALSE	NA	NA	NA	NA	NA	none	0.481357042	0	0
ENSG00000010539.11	-	ZNF200	protein_coding	chr16	3233222	44	4.390679877	expressed	low	0	3.894336946	9.981537036	0	FALSE	NA	NA	NA	NA	NA	none	22.20414617	0	1
ENSG00000010610.10	+	CD4	protein_coding	chr12	6783858	3	0.060247626	expressed	low	0	0	0.131824109	0	FALSE	NA	NA	NA	NA	NA	none	0.240678521	0	0
ENSG00000010626.15	+	LRRC23	protein_coding	chr12	6870569	32	1.237808214	expressed	low	0	167.0362852	258.6067021	0	FALSE	2	ENSG00000240370.6;ENSG00000010626.15	RPL13P5;LRRC23	transcribed_processed_pseudogene;protein_coding	+;+	nearby_same_strand	127.7621792	0	1
ENSG00000010671.15	-	BTK	protein_coding	chrX	101387797	47	30.40349101	expressed	low	0	608.4246065	1137.276073	0	FALSE	3	ENSG00000010671.15;ENSG00000241343.9;ENSG00000257529.5	BTK;RPL36A;RPL36A-HNRNPH2	protein_coding;protein_coding;protein_coding	-;+;+	multiple_nearby_promoters	0	0	1
ENSG00000010704.18	+	HFE	protein_coding	chr6	26084281	20	0.968217612	expressed	low	0	1.355814234	2.741941467	0	FALSE	NA	NA	NA	NA	NA	none	17.32429566	0	1
ENSG00000010803.16	-	SCMH1	protein_coding	chr1	41239155	29	10.44413821	expressed	low	0	2.538947544	6.259453433	0	FALSE	3	ENSG00000010803.16;ENSG00000287400.1;ENSG00000235358.2	SCMH1;AC093151.8;AC093151.3	protein_coding;lncRNA;lncRNA	-;+;+	multiple_nearby_promoters	0	0	1
ENSG00000010810.17	-	FYN	protein_coding	chr6	111870453	32	3.165534192	expressed	low	0	1.128998995	2.286757385	0	FALSE	NA	NA	NA	NA	NA	none	8.13004563	0	0
ENSG00000010818.10	-	HIVEP2	protein_coding	chr6	142953699	1	0.137495057	expressed	low	0	0.019022136	0.095976318	0	FALSE	NA	NA	NA	NA	NA	none	0.354389771	0	0
ENSG00000010932.17	+	FMO1	protein_coding	chr1	171245471	1	0.051114355	expressed	low	0	0	0.047988159	0	FALSE	NA	NA	NA	NA	NA	none	0.240678521	0	0
ENSG00000011007.12	+	ELOA	protein_coding	chr1	23740155	36	19.35130096	expressed	low	0	7.005476563	10.20318604	0	FALSE	NA	NA	NA	NA	NA	none	109.8968744	0	1
ENSG00000011009.11	+	LYPLA2	protein_coding	chr1	23788145	46	41.86051896	expressed	low	0	36.60728345	46.35656143	0	TRUE	NA	NA	NA	NA	NA	none	115.1918018	0	1
ENSG00000011021.23	+	CLCN6	protein_coding	chr1	11803096	77	4.870406911	expressed	low	0	34.81027078	41.70171002	0	TRUE	NA	NA	NA	NA	NA	none	34.96321302	0	1
ENSG00000011028.14	+	MRC2	protein_coding	chr17	62624670	9	3.299513132	expressed	low	0	0.679299637	1.304286905	0	FALSE	2	ENSG00000274565.1;ENSG00000011028.14	AC080038.1;MRC2	lncRNA;protein_coding	-;+	bidirectional	0	1	0
ENSG00000011052.21	+	NME1-NME2	protein_coding	chr17	51150590	62	0.782893356	expressed	low	0	99.87760678	169.046696	0	FALSE	2	ENSG00000239672.7;ENSG00000011052.21	NME1;NME1-NME2	protein_coding;protein_coding	+;+	nearby_same_strand	0.588440282	0	1
ENSG00000011083.9	+	SLC6A7	protein_coding	chr5	150187062	0	0	off	low	0	0	0	0	FALSE	NA	NA	NA	NA	NA	none	0.481357042	1	0
ENSG00000011105.14	+	TSPAN9	protein_coding	chr12	3074355	4	0.145946301	expressed	low	0	0.072970963	0.248720004	0	FALSE	NA	NA	NA	NA	NA	none	2.266561918	1	0
ENSG00000011114.15	-	BTBD7	protein_coding	chr14	93330093	0	2.993102247	expressed	low	0	1.976016577	2.67741409	0	FALSE	3	ENSG00000011114.15;ENSG00000133958.13;ENSG00000278396.1	BTBD7;UNC79;AL122023.1	protein_coding;protein_coding;lncRNA	-;+;+	multiple_nearby_promoters	0	0	1
ENSG00000011132.12	-	APBA3	protein_coding	chr19	3758693	53	3.650584089	expressed	low	0	18.28170103	36.85201392	0	FALSE	2	ENSG00000011132.12;ENSG00000183617.5	APBA3;MRPL54	protein_coding;protein_coding	-;+	bidirectional	0	0	1
ENSG00000011143.16	-	MKS1	protein_coding	chr17	58216606	31	13.46711751	expressed	low	0	6.208912242	10.74934758	0	FALSE	NA	NA	NA	NA	NA	none	0.12033926	0	1
ENSG00000011198.10	+	ABHD5	protein_coding	chr3	43687108	87	15.35720664	expressed	low	0	8.599856795	20.58692014	0	TRUE	NA	NA	NA	NA	NA	none	8.063765531	0	1
ENSG00000011201.12	-	ANOS1	protein_coding	chrX	8729138	0	0	off	low	0	0	0.057760598	0	FALSE	NA	NA	NA	NA	NA	none	0	1	0
ENSG00000011243.18	-	AKAP8L	protein_coding	chr19	15416142	31	20.22724973	expressed	low	0	14.60393701	44.64894263	0	FALSE	NA	NA	NA	NA	NA	none	125.017783	0	1
ENSG00000011258.16	-	MBTD1	protein_coding	chr17	51257164	60	9.672775636	expressed	low	0	26.46541378	40.74862731	0	FALSE	2	ENSG00000011258.16;ENSG00000011260.14	MBTD1;UTP18	protein_coding;protein_coding	-;+	bidirectional	0.240678521	0	1
ENSG00000011260.14	+	UTP18	protein_coding	chr17	51257546	60	51.8393865	expressed	low	0	38.08074254	52.27265416	0	FALSE	2	ENSG00000011258.16;ENSG00000011260.14	MBTD1;UTP18	protein_coding;protein_coding	-;+	bidirectional	0.949458064	0	1
ENSG00000011275.18	-	RNF216	protein_coding	chr7	5778740	38	14.39098025	expressed	low	0	3.517780388	5.720560091	0	FALSE	NA	NA	NA	NA	NA	none	45.55659071	0	1
ENSG00000011295.16	+	TTC19	protein_coding	chr17	15996784	48	12.90789675	expressed	low	0	10.89230414	16.37406693	0	FALSE	2	ENSG00000214941.8;ENSG00000011295.16	ZSWIM7;TTC19	protein_coding;protein_coding	-;+	bidirectional	0	0	1
ENSG00000011304.20	+	PTBP1	protein_coding	chr19	794075	61	61.21791578	expressed	low	0	34.36008817	57.79168938	0	TRUE	NA	NA	NA	NA	NA	none	150.7658269	0	1
ENSG00000011332.19	-	DPF1	protein_coding	chr19	38226715	14	0.582601135	expressed	low	0	0.05741781	0.215224224	0	FALSE	NA	NA	NA	NA	NA	none	3.951311565	1	0
ENSG00000011347.9	-	SYT7	protein_coding	chr11	61578149	19	0.019398085	expressed	low	0	0	0.033423731	0	FALSE	NA	NA	NA	NA	NA	none	1.925428167	1	0
ENSG00000011376.12	+	LARS2	protein_coding	chr3	45385561	38	12.12889239	expressed	low	0	2.175714023	6.715440107	0	FALSE	NA	NA	NA	NA	NA	none	17.6445103	0	1
ENSG00000011405.13	-	PIK3C2A	protein_coding	chr11	17204984	43	9.550751851	expressed	low	0	1.451145254	5.470650106	0	FALSE	2	ENSG00000011405.13;ENSG00000070081.17	PIK3C2A;NUCB2	protein_coding;protein_coding	-;+	bidirectional	0.234050511	0	1
ENSG00000011422.12	-	PLAUR	protein_coding	chr19	43667548	45	2.915016898	expressed	low	0	3.507483088	19.93695698	0	FALSE	NA	NA	NA	NA	NA	none	13.17103855	0	1
ENSG00000011426.11	+	ANLN	protein_coding	chr7	36386821	61	23.27475166	expressed	low	0	4.85524466	14.92320024	0	FALSE	NA	NA	NA	NA	NA	none	0	0	1
ENSG00000011451.19	-	WIZ	protein_coding	chr19	15446952	30	1.598236903	expressed	low	0	0.117054072	0.373080006	0	FALSE	NA	NA	NA	NA	NA	none	4.686603147	1	1
ENSG00000011454.17	+	RABGAP1	protein_coding	chr9	122937833	33	3.453645169	expressed	low	0	7.850927445	13.58091038	0	FALSE	NA	NA	NA	NA	NA	none	0	0	1
ENSG00000011465.17	-	DCN	protein_coding	chr12	91179825	1	0.037587007	expressed	low	0	0.047091489	0.239940794	0	FALSE	NA	NA	NA	NA	NA	none	0.361017781	0	0
ENSG00000011478.12	+	QPCTL	protein_coding	chr19	45689666	44	10.20945506	expressed	low	0	111.2019135	367.1691801	0	FALSE	2	ENSG00000125743.10;ENSG00000011478.12	SNRPD2;QPCTL	protein_coding;protein_coding	-;+	bidirectional	1.310475845	0	1
ENSG00000011485.15	+	PPP5C	protein_coding	chr19	46344087	47	15.36363456	expressed	low	0	12.37772171	24.37497256	0	FALSE	NA	NA	NA	NA	NA	none	44.80348526	0	1
ENSG00000011523.14	+	CEP68	protein_coding	chr2	65053366	48	2.527582332	expressed	low	0	2.370688422	3.311182959	0	FALSE	2	ENSG00000237638.2;ENSG00000011523.14	LINC02245;CEP68	lncRNA;protein_coding	-;+	bidirectional	0.12033926	0	1
ENSG00000011566.15	-	MAP4K3	protein_coding	chr2	39434302	48	9.160694815	expressed	low	0	6.109664522	11.66112259	0	FALSE	NA	NA	NA	NA	NA	none	0.588440282	0	1
ENSG00000011590.14	+	ZBTB32	protein_coding	chr19	35701558	20	0.171010189	expressed	low	0	0.034884359	0.080709084	0	FALSE	NA	NA	NA	NA	NA	none	2.032511408	1	0
ENSG00000011600.11	-	TYROBP	protein_coding	chr19	35905296	21	0.815546289	expressed	low	0	1.444434696	2.907864578	0	FALSE	NA	NA	NA	NA	NA	none	2.373645159	0	1
ENSG00000011638.10	+	TMEM159	protein_coding	chr16	21155377	13	8.664220144	expressed	low	0	5.05817091	11.55225545	0	FALSE	NA	NA	NA	NA	NA	none	0.12033926	0	1
ENSG00000011677.13	-	GABRA3	protein_coding	chrX	152448316	1	1.165654835	expressed	low	0	0.15373833	1.199703971	0	FALSE	NA	NA	NA	NA	NA	none	1.557782376	0	0
ENSG00000012048.22	-	BRCA1	protein_coding	chr17	43167246	67	26.43474187	expressed	low	0	12.9296732	16.90041925	0	TRUE	4	ENSG00000012048.22;ENSG00000267002.4;ENSG00000267340.1;ENSG00000188554.14	BRCA1;AC060780.1;AC060780.2;NBR1	protein_coding;lncRNA;processed_pseudogene;protein_coding	-;-;-;+	multiple_nearby_promoters	0.949458064	0	1
ENSG00000012061.15	-	ERCC1	protein_coding	chr19	45475829	49	10.36765787	expressed	low	0	0.635864619	1.343668447	0	TRUE	NA	NA	NA	NA	NA	none	4.065022815	0	1
ENSG00000012124.17	+	CD22	protein_coding	chr19	35316261	33	0.155489251	expressed	low	0	0.150164238	0.479881588	0	TRUE	NA	NA	NA	NA	NA	none	12.64328544	0	1
ENSG00000012171.20	+	SEMA3B	protein_coding	chr3	50264558	3	0.273850565	expressed	low	0	0.647187856	1.055739494	0	FALSE	2	ENSG00000232352.1;ENSG00000012171.20	SEMA3B-AS1;SEMA3B	lncRNA;protein_coding	-;+	bidirectional	0	1	0
ENSG00000012174.12	+	MBTPS2	protein_coding	chrX	21836617	34	1.057494605	expressed	low	0	1.572872873	1.768789398	0	FALSE	NA	NA	NA	NA	NA	none	16.15300802	0	1
ENSG00000012211.13	-	PRICKLE3	protein_coding	chrX	49183529	34	3.900748658	expressed	low	0	10.15066317	15.18613736	0	FALSE	NA	NA	NA	NA	NA	none	69.90695954	0	1
ENSG00000012223.13	-	LTF	protein_coding	chr3	46482235	5	0.040691023	expressed	low	0	0.047091489	0.186326701	0	FALSE	NA	NA	NA	NA	NA	none	0.361017781	1	0
ENSG00000012232.9	+	EXTL3	protein_coding	chr8	28597469	5	4.047074942	expressed	low	0	0.005570622	0.115521197	0	FALSE	NA	NA	NA	NA	NA	none	0	0	0
ENSG00000012504.15	+	NR1H4	protein_coding	chr12	100470708	1	0.038731828	expressed	low	0	0.01162812	0.115521197	0	FALSE	NA	NA	NA	NA	NA	none	0.481357042	1	0
ENSG00000012660.14	-	ELOVL5	protein_coding	chr6	53346180	47	75.1238067	expressed	low	0	15.54379552	22.50644649	0	FALSE	2	ENSG00000012660.14;ENSG00000271367.1	ELOVL5;AL034374.1	protein_coding;lncRNA	-;+	bidirectional	1.317103855	0	1
ENSG00000012779.11	+	ALOX5	protein_coding	chr10	45371176	0	1.152439787	expressed	low	0	0.954791485	8.819463836	0	FALSE	NA	NA	NA	NA	NA	none	2.74791896	1	0
ENSG00000012817.15	-	KDM5D	protein_coding	chrY	19741940	0	0	off	low	0	0	0.124217801	0	FALSE	NA	NA	NA	NA	NA	none	0	0	0
ENSG00000012822.16	-	CALCOCO1	protein_coding	chr12	53724746	34	3.149895598	expressed	low	0	2.766613436	4.033130181	0	FALSE	NA	NA	NA	NA	NA	none	6.291816674	0	1
ENSG00000012963.15	+	UBR7	protein_coding	chr14	93204241	0	22.70124208	expressed	low	0	17.12392404	58.10716208	0	FALSE	2	ENSG00000170270.5;ENSG00000012963.15	GON7;UBR7	protein_coding;protein_coding	-;+	bidirectional	0	0	1
ENSG00000012983.11	-	MAP4K5	protein_coding	chr14	50558127	4	5.545938604	expressed	low	0	0.070333633	0.186326701	0	FALSE	NA	NA	NA	NA	NA	none	0.722035563	1	0
ENSG00000013016.16	+	EHD3	protein_coding	chr2	31231152	2	0.051038612	expressed	low	0	0.055783327	0.133264955	0	FALSE	2	ENSG00000214711.10;ENSG00000013016.16	CAPN14;EHD3	protein_coding;protein_coding	-;+	bidirectional	0	1	0
ENSG00000013275.8	+	PSMC4	protein_coding	chr19	39968165	0	68.85731165	expressed	low	0	45.92407015	104.3734015	0	FALSE	NA	NA	NA	NA	NA	none	48.57273531	0	1
ENSG00000013288.9	+	MAN2B2	protein_coding	chr4	6572189	20	2.525939552	expressed	low	0	2.916280228	4.311146735	0	FALSE	NA	NA	NA	NA	NA	none	21.16086089	1	1
ENSG00000013293.6	-	SLC7A14	protein_coding	chr3	170583076	6	0	off	low	0	0	0	0	FALSE	NA	NA	NA	NA	NA	none	1.684749646	0	0
ENSG00000013297.11	+	CLDN11	protein_coding	chr3	170415865	4	0.024232188	expressed	low	0	0.019239909	0.082906668	0	FALSE	2	ENSG00000013297.11;ENSG00000285218.1	CLDN11;AC026316.4	protein_coding;protein_coding	+;+	nearby_same_strand	0	0	0
ENSG00000013306.16	-	SLC25A39	protein_coding	chr17	44321871	56	44.07290455	expressed	low	0	65.88438222	78.72535789	0	FALSE	NA	NA	NA	NA	NA	none	57.55944687	0	1
ENSG00000013364.19	+	MVP	protein_coding	chr16	29817394	20	1.166459505	expressed	low	0	29.22489372	48.5418541	0	FALSE	NA	NA	NA	NA	NA	none	0	0	0
ENSG00000013374.16	+	NUB1	protein_coding	chr7	151338699	18	27.03827981	expressed	low	0	3.50027544	6.430413283	0	FALSE	NA	NA	NA	NA	NA	none	23.1270922	0	0
ENSG00000013375.16	-	PGM3	protein_coding	chr6	83190937	33	15.75363861	expressed	low	0	20.82191143	23.8981031	0	FALSE	NA	NA	NA	NA	NA	none	0.595068292	0	1
ENSG00000013392.8	+	RWDD2A	protein_coding	chr6	83190357	33	2.03419918	expressed	low	0	26.55976437	31.62889384	0	FALSE	NA	NA	NA	NA	NA	none	0.601696302	0	1
ENSG00000013441.16	-	CLK1	protein_coding	chr2	200861745	51	13.75357235	expressed	low	0	12.25030742	21.26556034	0	FALSE	NA	NA	NA	NA	NA	none	48.82107692	0	1
ENSG00000013503.10	+	POLR3B	protein_coding	chr12	106354748	73	11.3270037	expressed	low	0	3.373577649	5.776059849	0	FALSE	NA	NA	NA	NA	NA	none	38.69165993	0	1
ENSG00000013523.10	-	ANGEL1	protein_coding	chr14	76823247	0	3.840921902	expressed	low	0	0	0.0621089	0	FALSE	2	ENSG00000013523.10;ENSG00000100565.15	ANGEL1;LRRC74A	protein_coding;protein_coding	-;+	bidirectional	0	1	0
ENSG00000013561.18	+	RNF14	protein_coding	chr5	141955328	15	27.79778799	expressed	low	0	0.279790763	2.48435601	0	FALSE	NA	NA	NA	NA	NA	none	2.039139418	1	0
ENSG00000013563.14	-	DNASE1L1	protein_coding	chrX	154409113	36	2.789401929	expressed	low	0	14.19259138	18.64379845	0	FALSE	NA	NA	NA	NA	NA	none	3.209391972	0	1
ENSG00000013573.17	+	DDX11	protein_coding	chr12	31070860	52	16.58717422	expressed	low	0	10.90345335	20.18777365	0	FALSE	2	ENSG00000245614.4;ENSG00000013573.17	DDX11-AS1;DDX11	lncRNA;protein_coding	-;+	bidirectional	0	0	1
ENSG00000013583.10	-	HEBP1	protein_coding	chr12	12997266	7	0.347275788	expressed	low	0	1.538549019	6.707761228	0	FALSE	3	ENSG00000013583.10;ENSG00000183935.5;ENSG00000255621.1	HEBP1;HTR7P1;AC023790.2	protein_coding;transcribed_processed_pseudogene;lncRNA	-;+;+	multiple_nearby_promoters	0	0	0
ENSG00000013588.8	+	GPRC5A	protein_coding	chr12	12887782	9	0.002967094	expressed	low	0	0	0.024229992	0	FALSE	NA	NA	NA	NA	NA	none	0.240678521	1	0
ENSG00000013619.14	+	MAMLD1	protein_coding	chrX	150358422	1	0.025218805	expressed	low	0	0	0	0	FALSE	NA	NA	NA	NA	NA	none	0.240678521	1	0
ENSG00000013725.14	+	CD6	protein_coding	chr11	60968680	1	0.004203134	expressed	low	0	0	0.095976318	0	FALSE	NA	NA	NA	NA	NA	none	0.12033926	1	0
ENSG00000013810.19	+	TACC3	protein_coding	chr4	1709891	56	7.333989618	expressed	low	0	25.92619936	33.70156054	0	FALSE	3	ENSG00000163950.13;ENSG00000270195.2;ENSG00000013810.19	SLBP;AC016773.1;TACC3	protein_coding;lncRNA;protein_coding	-;+;+	multiple_nearby_promoters	1.076425334	0	1
ENSG00000014123.10	+	UFL1	protein_coding	chr6	96518595	63	18.20400179	expressed	low	0	6.486294753	13.48467263	0	FALSE	NA	NA	NA	NA	NA	none	0.468101022	0	1
ENSG00000014138.9	+	POLA2	protein_coding	chr11	65258920	33	2.781722327	expressed	low	0	10.30285332	11.21848618	0	FALSE	3	ENSG00000287821.1;ENSG00000014138.9;ENSG00000285816.1	AP000944.6;POLA2;AP000944.5	lncRNA;protein_coding;protein_coding	-;+;+	multiple_nearby_promoters	0	0	1
ENSG00000014164.7	-	ZC3H3	protein_coding	chr8	143538448	0	2.716130624	expressed	low	0	9.321880895	13.85505945	0	FALSE	3	ENSG00000014164.7;ENSG00000287576.1;ENSG00000275558.1	ZC3H3;AC067930.8;RN7SKP175	protein_coding;lncRNA;misc_RNA	-;+;+	multiple_nearby_promoters	0.595068292	0	1
ENSG00000014216.15	+	CAPN1	protein_coding	chr11	65177566	26	31.15921647	expressed	low	0	50.73131425	70.52589831	0	FALSE	NA	NA	NA	NA	NA	none	5.810459632	0	1
ENSG00000014257.16	+	ACPP	protein_coding	chr3	132314369	0	0.661938185	expressed	low	0	0.047091489	0.287928953	0	FALSE	NA	NA	NA	NA	NA	none	0.240678521	0	0
ENSG00000014641.19	+	MDH1	protein_coding	chr2	63585609	50	74.27385634	expressed	low	0	37.53308252	65.48155273	0	FALSE	NA	NA	NA	NA	NA	none	17.36406372	0	1
ENSG00000014824.14	+	SLC30A9	protein_coding	chr4	41987502	37	24.05428972	expressed	low	0	11.18996445	20.77887277	0	FALSE	2	ENSG00000272862.1;ENSG00000014824.14	AC106052.1;SLC30A9	lncRNA;protein_coding	-;+	bidirectional	1.791832887	0	1
ENSG00000014914.21	-	MTMR11	protein_coding	chr1	149933880	27	0.35431322	expressed	low	0	2.221613326	3.791064547	0	FALSE	NA	NA	NA	NA	NA	none	20.8075062	0	1
ENSG00000014919.12	-	COX15	protein_coding	chr10	99729101	35	11.43199479	expressed	low	0	7.889020199	14.30047133	0	FALSE	2	ENSG00000285932.1;ENSG00000014919.12	AL133353.2;COX15	protein_coding;protein_coding	-;-	nearby_same_strand	0	0	1
ENSG00000015133.19	-	CCDC88C	protein_coding	chr14	91414845	35	2.639359021	expressed	low	0	1.653717703	2.504658071	0	FALSE	3	ENSG00000015133.19;ENSG00000258798.1;ENSG00000258446.1	CCDC88C;AL133153.2;AL133153.1	protein_coding;lncRNA;processed_pseudogene	-;+;+	multiple_nearby_promoters	0.595068292	0	1
ENSG00000015153.14	-	YAF2	protein_coding	chr12	42235350	23	2.603626067	expressed	low	0	4.671869682	9.741533488	0	FALSE	2	ENSG00000015153.14;ENSG00000134283.18	YAF2;PPHLN1	protein_coding;protein_coding	-;+	bidirectional	0	0	1
ENSG00000015171.19	+	ZMYND11	protein_coding	chr10	131465	12	5.420211611	expressed	low	0	1.530764476	2.255443465	0	FALSE	NA	NA	NA	NA	NA	none	46.49279275	1	1
ENSG00000015285.10	+	WAS	protein_coding	chrX	48673596	30	2.604532438	expressed	low	0	1.201074884	3.137413794	0	FALSE	NA	NA	NA	NA	NA	none	55.74772995	0	1
ENSG00000015413.9	+	DPEP1	protein_coding	chr16	89610308	10	0.009149534	expressed	low	0	0.005570622	0.143964476	0	FALSE	NA	NA	NA	NA	NA	none	0.12033926	0	0
ENSG00000015475.18	-	BID	protein_coding	chr22	17771771	26	22.51345187	expressed	low	0	8.418620323	13.59669355	0	FALSE	NA	NA	NA	NA	NA	none	23.58090212	0	1
ENSG00000015479.19	+	MATR3	protein_coding	chr5	139290674	54	2.088190143	expressed	low	0	16.84286283	34.5034862	0	FALSE	2	ENSG00000120725.13;ENSG00000015479.19	SIL1;MATR3	protein_coding;protein_coding	-;+	bidirectional	0.481357042	0	1
ENSG00000015520.14	-	NPC1L1	protein_coding	chr7	44538316	6	0.02799101	expressed	low	0	0.11227808	0.188321196	0	FALSE	NA	NA	NA	NA	NA	none	2.273189928	0	0
ENSG00000015532.10	+	XYLT2	protein_coding	chr17	50343126	29	4.58200093	expressed	low	0	3.477899852	4.462898771	0	FALSE	NA	NA	NA	NA	NA	none	57.12345081	0	1
ENSG00000015568.13	+	RGPD5	protein_coding	chr2	109789758	0	3.958903713	expressed	low	0	0.359625721	1.575226692	0	FALSE	NA	NA	NA	NA	NA	none	7.320810857	0	0
ENSG00000015592.16	-	STMN4	protein_coding	chr8	27255421	5	0.019851928	expressed	low	0	0.005570622	0.095976318	0	FALSE	NA	NA	NA	NA	NA	none	0.962714084	1	0
ENSG00000015676.18	-	NUDCD3	protein_coding	chr7	44487659	60	11.60721603	expressed	low	0	8.817704694	16.40400997	0	FALSE	NA	NA	NA	NA	NA	none	26.9437734	0	1
ENSG00000016082.15	+	ISL1	protein_coding	chr5	51380448	2	0.007737812	expressed	low	0	0	0	0	FALSE	2	ENSG00000259663.2;ENSG00000016082.15	AC010478.1;ISL1	lncRNA;protein_coding	-;+	bidirectional	0	1	0
ENSG00000016391.11	-	CHDH	protein_coding	chr3	53843420	3	0.388482183	expressed	low	0	0.439056107	0.891299488	0	FALSE	2	ENSG00000016391.11;ENSG00000056736.10	CHDH;IL17RB	protein_coding;protein_coding	-;+	bidirectional	0	1	0
ENSG00000016402.13	-	IL20RA	protein_coding	chr6	137042181	0	0	off	low	0	0	0	0	FALSE	NA	NA	NA	NA	NA	none	0	1	0
ENSG00000016490.15	+	CLCA1	protein_coding	chr1	86465368	4	0.063593125	expressed	low	0	0.018753033	0.095976318	0	FALSE	NA	NA	NA	NA	NA	none	0.354389771	0	0
ENSG00000016602.9	+	CLCA4	protein_coding	chr1	86544078	2	0.012647182	expressed	low	0	0	0	0	FALSE	NA	NA	NA	NA	NA	none	0.240678521	0	0
ENSG00000016864.18	-	GLT8D1	protein_coding	chr3	52703033	29	15.255394	expressed	low	0	64.1682321	76.99487779	0	FALSE	NA	NA	NA	NA	NA	none	2.139594648	0	1
ENSG00000017260.19	+	ATP2C1	protein_coding	chr3	130847595	55	10.405757	expressed	low	0	1.539921981	7.461600119	0	FALSE	NA	NA	NA	NA	NA	none	3.095680722	0	1
ENSG00000017427.16	-	IGF1	protein_coding	chr12	102478745	37	0.970169808	expressed	low	0	1.875233982	7.630117253	0	FALSE	NA	NA	NA	NA	NA	none	3.309847203	0	0
ENSG00000017483.15	-	SLC38A5	protein_coding	chrX	48467261	44	34.68903663	expressed	low	0	19.13408218	23.54549371	0	FALSE	NA	NA	NA	NA	NA	none	13.45252021	0	1
ENSG00000017797.13	+	RALBP1	protein_coding	chr18	9472009	45	25.55995266	expressed	low	0	6.647416586	10.15606683	0	FALSE	2	ENSG00000273335.1;ENSG00000017797.13	AP005432.2;RALBP1	lncRNA;protein_coding	-;+	bidirectional	1.176880565	0	1
ENSG00000018189.13	+	RUFY3	protein_coding	chr4	70701204	36	7.203684442	expressed	low	0	3.768672619	5.380605612	0	FALSE	2	ENSG00000207058.1;ENSG00000018189.13	RNU6-784P;RUFY3	snRNA;protein_coding	-;+	bidirectional	0.702151533	0	1
ENSG00000018236.15	+	CNTN1	protein_coding	chr12	40689439	0	0	off	low	0	0	0.012114996	0	FALSE	NA	NA	NA	NA	NA	none	1.684749646	0	0
ENSG00000018280.17	+	SLC11A1	protein_coding	chr2	218379029	1	0.668113639	expressed	low	0	0.060326759	0.191952635	0	FALSE	NA	NA	NA	NA	NA	none	1.076425334	0	0
ENSG00000018408.14	-	WWTR1	protein_coding	chr3	149733715	1	0.048288305	expressed	low	0	7.142070357	12.55113573	0	FALSE	NA	NA	NA	NA	NA	none	4.045138785	0	0
ENSG00000018510.16	+	AGPS	protein_coding	chr2	177389757	49	30.82691643	expressed	low	0	17.09916161	26.3454992	0	FALSE	3	ENSG00000116044.16;ENSG00000213963.6;ENSG00000018510.16	NFE2L2;AC019080.1;AGPS	protein_coding;lncRNA;protein_coding	-;-;+	multiple_nearby_promoters	0	0	1
ENSG00000018610.14	-	CXorf56	protein_coding	chrX	119562409	37	27.63580867	expressed	low	0	5.310642441	10.65350684	0	FALSE	NA	NA	NA	NA	NA	none	3.677492994	0	1
ENSG00000018625.15	+	ATP1A2	protein_coding	chr1	160112759	3	0.040131949	expressed	low	0	0	0	0	FALSE	NA	NA	NA	NA	NA	none	1.083053344	1	0
ENSG00000018699.13	+	TTC27	protein_coding	chr2	32625032	39	45.25181871	expressed	low	0	15.88823874	30.76040981	0	FALSE	NA	NA	NA	NA	NA	none	29.95328999	0	1
ENSG00000018869.16	-	ZNF582	protein_coding	chr19	56390546	35	1.316939976	expressed	low	0	1.281039257	2.831301371	0	FALSE	2	ENSG00000018869.16;ENSG00000267454.6	ZNF582;ZNF582-AS1	protein_coding;lncRNA	-;+	bidirectional	0	0	1
ENSG00000019102.12	-	VSIG2	protein_coding	chr11	124749256	1	0.207042644	expressed	low	0	0.82167521	1.506569571	0	FALSE	NA	NA	NA	NA	NA	none	14.22095184	1	0
ENSG00000019144.19	+	PHLDB1	protein_coding	chr11	118603440	48	1.439119054	expressed	low	0	1.289073935	1.694890768	0	FALSE	NA	NA	NA	NA	NA	none	41.49260297	0	1
ENSG00000019169.10	+	MARCO	protein_coding	chr2	118939166	0	0.031453705	expressed	low	0	0	0	0	FALSE	NA	NA	NA	NA	NA	none	0	1	0
ENSG00000019186.10	-	CYP24A1	protein_coding	chr20	54170987	3	0	off	low	0	0	0.024229992	0	FALSE	NA	NA	NA	NA	NA	none	0.240678521	1	0
ENSG00000019485.13	+	PRDM11	protein_coding	chr11	45092806	9	0.112380964	expressed	low	0	0	0	0	FALSE	NA	NA	NA	NA	NA	none	0	1	0
ENSG00000019505.8	-	SYT13	protein_coding	chr11	45283342	2	0.064815447	expressed	low	0	0	0	0	FALSE	NA	NA	NA	NA	NA	none	0.842374823	1	0
ENSG00000019549.13	-	SNAI2	protein_coding	chr8	48918741	3	0.007632512	expressed	low	0	0	0.047988159	0	FALSE	NA	NA	NA	NA	NA	none	0.240678521	1	0
ENSG00000019582.15	-	CD74	protein_coding	chr5	150409930	7	0.262539138	expressed	low	0	0.2185206	0.869524604	0	FALSE	NA	NA	NA	NA	NA	none	0.835746813	0	0
ENSG00000019991.18	-	HGF	protein_coding	chr7	81767439	0	0	off	low	0	0	0.012114996	0	FALSE	NA	NA	NA	NA	NA	none	0.354389771	0	0
ENSG00000019995.6	+	ZRANB1	protein_coding	chr10	124939123	7	1.284487495	expressed	low	0	16.50784405	20.29899118	0	FALSE	NA	NA	NA	NA	NA	none	10.2971874	0	0
ENSG00000020129.16	+	NCDN	protein_coding	chr1	35554473	52	8.266664769	expressed	low	0	15.86466924	24.08616957	0	FALSE	NA	NA	NA	NA	NA	none	0.361017781	0	1
ENSG00000020181.18	+	ADGRA2	protein_coding	chr8	37781191	63	0.206088627	expressed	low	0	0.019509012	0.191952635	0	FALSE	NA	NA	NA	NA	NA	none	3.931427535	0	1
ENSG00000020256.20	-	ZFP64	protein_coding	chr20	52201309	3	1.694673752	expressed	low	0	0.05113302	0.079094465	0	FALSE	NA	NA	NA	NA	NA	none	0.12033926	0	0
ENSG00000020426.11	+	MNAT1	protein_coding	chr14	60731742	36	13.30549026	expressed	low	0	5.650282923	13.10076736	0	FALSE	NA	NA	NA	NA	NA	none	6.679346495	0	1
ENSG00000020577.13	+	SAMD4A	protein_coding	chr14	54564097	34	1.37645591	expressed	low	0	2.38360173	7.668866789	0	FALSE	NA	NA	NA	NA	NA	none	24.51151123	0	1
ENSG00000020633.18	-	RUNX3	protein_coding	chr1	24962122	28	0.056598689	expressed	low	0	0.037412403	0.310544501	0	FALSE	NA	NA	NA	NA	NA	none	0	1	0
ENSG00000020922.12	-	MRE11	protein_coding	chr11	94490909	35	15.75913972	expressed	low	0	10.17760212	25.43372418	0	FALSE	2	ENSG00000020922.12;ENSG00000168876.9	MRE11;ANKRD49	protein_coding;protein_coding	-;+	bidirectional	0	0	1
ENSG00000021300.14	+	PLEKHB1	protein_coding	chr11	73643178	6	0.033562	expressed	low	0	0.047629695	0.124217801	0	FALSE	NA	NA	NA	NA	NA	none	1.317103855	1	0
ENSG00000021355.13	-	SERPINB1	protein_coding	chr6	2838960	54	46.40396314	expressed	low	0	25.0084482	39.9741363	0	FALSE	NA	NA	NA	NA	NA	none	46.20012523	0	1
ENSG00000021461.16	+	CYP3A43	protein_coding	chr7	99825013	7	0.035524983	expressed	low	0	0.048224071	0.107612112	0	FALSE	NA	NA	NA	NA	NA	none	0.835746813	0	0
ENSG00000021488.13	-	SLC7A9	protein_coding	chr19	32866768	3	0	off	low	0	0.006057498	0.0621089	0	FALSE	NA	NA	NA	NA	NA	none	0.956086074	1	0
ENSG00000021574.12	+	SPAST	protein_coding	chr2	32060547	52	11.1980686	expressed	low	0	5.836308503	9.327000148	0	FALSE	NA	NA	NA	NA	NA	none	43.83973609	0	1
ENSG00000021645.18	+	NRXN3	protein_coding	chr14	78167373	1	0.01107506	expressed	low	0	0	0	0	FALSE	NA	NA	NA	NA	NA	none	0.601696302	1	0
ENSG00000021762.20	-	OSBPL5	protein_coding	chr11	3163740	62	2.364417	expressed	low	0	1.064826535	2.155573368	0	FALSE	NA	NA	NA	NA	NA	none	20.93343839	0	1
ENSG00000021776.11	-	AQR	protein_coding	chr15	34966743	46	15.70183421	expressed	low	0	4.036921862	11.4211818	0	FALSE	NA	NA	NA	NA	NA	none	21.36839936	0	1
ENSG00000021826.16	+	CPS1	protein_coding	chr2	210474682	19	2.423338645	expressed	low	0	5.460492817	9.501655448	0	FALSE	2	ENSG00000115365.12;ENSG00000021826.16	LANCL1;CPS1	protein_coding;protein_coding	-;+	bidirectional	0	0	1
ENSG00000021852.13	-	C8B	protein_coding	chr1	56963141	2	0	off	low	0	0	0	0	FALSE	NA	NA	NA	NA	NA	none	0.240678521	0	0
ENSG00000022267.19	+	FHL1	protein_coding	chrX	136143702	1	0.126185685	expressed	low	0	0.018753033	0.124360002	0	FALSE	NA	NA	NA	NA	NA	none	0.240678521	1	0
ENSG00000022277.12	+	RTF2	protein_coding	chr20	56465585	32	39.55273553	expressed	low	0	18.8689971	37.42886782	0	FALSE	NA	NA	NA	NA	NA	none	12.20169646	0	1
ENSG00000022355.18	+	GABRA1	protein_coding	chr5	161844063	1	0	off	low	0	0	0	0	FALSE	NA	NA	NA	NA	NA	none	2.166106688	0	0
ENSG00000022556.16	+	NLRP2	protein_coding	chr19	54950130	0	12.93965989	expressed	low	0	0.050897107	0.186326701	0	FALSE	NA	NA	NA	NA	NA	none	0.12033926	1	0
ENSG00000022567.9	-	SLC45A4	protein_coding	chr8	141305306	8	3.899511047	expressed	low	0	1.214904815	2.303431624	0	FALSE	NA	NA	NA	NA	NA	none	11.97427395	0	0
ENSG00000022840.16	+	RNF10	protein_coding	chr12	120530480	31	21.20657111	expressed	low	0	15.62215177	40.13931787	0	FALSE	NA	NA	NA	NA	NA	none	0.354389771	0	1
ENSG00000022976.15	+	ZNF839	protein_coding	chr14	102314377	41	2.141426675	expressed	low	0	1.05612298	2.071533161	0	FALSE	NA	NA	NA	NA	NA	none	16.15963603	0	1
ENSG00000023041.11	-	ZDHHC6	protein_coding	chr10	112443918	37	10.30703193	expressed	low	0	19.01016392	27.40065377	0	FALSE	2	ENSG00000023041.11;ENSG00000151532.13	ZDHHC6;VTI1A	protein_coding;protein_coding	-;+	bidirectional	0.468101022	0	1
ENSG00000023171.18	+	GRAMD1B	protein_coding	chr11	123355428	0	0.006051561	expressed	low	0	0	0	0	FALSE	NA	NA	NA	NA	NA	none	0.481357042	1	0
ENSG00000023191.17	-	RNH1	protein_coding	chr11	504301	0	23.63927954	expressed	low	0	36.48553385	40.20973397	0	FALSE	NA	NA	NA	NA	NA	none	73.31829705	0	1
ENSG00000023228.14	-	NDUFS1	protein_coding	chr2	206156510	0	24.96847847	expressed	low	0	475.017323	910.2680421	0	FALSE	6	ENSG00000023228.14;ENSG00000281780.1;ENSG00000207047.2;ENSG00000114942.14;ENSG00000277502.1;ENSG00000207406.1	NDUFS1;snoZ196;SNORD51;EEF1B2;AC007383.4;SNORA41	protein_coding;snoRNA;snoRNA;protein_coding;misc_RNA;snoRNA	-;+;+;+;+;+	multiple_nearby_promoters	0.12033926	0	1
ENSG00000023287.13	-	RB1CC1	protein_coding	chr8	52742844	0	26.80794106	expressed	low	0	0.005570622	0.20726667	0	FALSE	NA	NA	NA	NA	NA	none	0.12033926	1	0
ENSG00000023318.8	-	ERP44	protein_coding	chr9	100096001	43	9.617704037	expressed	low	0	10.96648427	15.8452579	0	FALSE	2	ENSG00000023318.8;ENSG00000119509.13	ERP44;INVS	protein_coding;protein_coding	-;+	bidirectional	0	0	1
ENSG00000023330.15	+	ALAS1	protein_coding	chr3	52195086	27	18.83694399	expressed	low	0	7.933456994	10.74934758	0	FALSE	NA	NA	NA	NA	NA	none	17.82450165	0	1
ENSG00000023445.14	+	BIRC3	protein_coding	chr11	102314450	23	0.291962723	expressed	low	0	0.061439673	0.248435601	0	FALSE	NA	NA	NA	NA	NA	none	0.240678521	0	0
ENSG00000023516.9	+	AKAP11	protein_coding	chr13	42269152	42	7.763876996	expressed	low	0	1.492038002	4.414910612	0	FALSE	NA	NA	NA	NA	NA	none	19.45622721	0	1
ENSG00000023572.9	-	GLRX2	protein_coding	chr1	193103115	41	12.3304502	expressed	low	0	7.071061404	13.34070815	0	FALSE	NA	NA	NA	NA	NA	none	31.61049252	0	1
ENSG00000023608.5	+	SNAPC1	protein_coding	chr14	61759420	27	5.960733267	expressed	low	0	2.448264383	4.318934294	0	FALSE	NA	NA	NA	NA	NA	none	12.45003807	0	1
ENSG00000023697.13	+	DERA	protein_coding	chr12	15908302	17	6.276832653	expressed	low	0	0.552934926	2.351419782	0	FALSE	NA	NA	NA	NA	NA	none	15.14389787	0	1
ENSG00000023734.11	+	STRAP	protein_coding	chr12	15879387	25	49.13906575	expressed	low	0	41.9119623	83.29078303	0	FALSE	2	ENSG00000151491.14;ENSG00000023734.11	EPS8;STRAP	protein_coding;protein_coding	-;+	bidirectional	0.234050511	0	1
ENSG00000023839.12	+	ABCC2	protein_coding	chr10	99779640	8	0.065330068	expressed	low	0	0.038899161	0.053806056	0	FALSE	NA	NA	NA	NA	NA	none	0.842374823	0	0
ENSG00000023892.11	+	DEF6	protein_coding	chr6	35294818	26	25.69942028	expressed	low	0	14.70862855	21.44689392	0	FALSE	NA	NA	NA	NA	NA	none	32.34785426	0	1
ENSG00000023902.14	+	PLEKHO1	protein_coding	chr1	150146183	17	1.951799589	expressed	low	0	1.842978314	2.901733379	0	FALSE	NA	NA	NA	NA	NA	none	17.01526687	0	0
ENSG00000023909.10	-	GCLM	protein_coding	chr1	93906457	40	13.12559257	expressed	low	0	7.124159088	12.83274439	0	FALSE	NA	NA	NA	NA	NA	none	18.64036443	0	1
ENSG00000024048.10	+	UBR2	protein_coding	chr6	42561062	49	28.41021718	expressed	low	0	6.014187327	22.67497369	0	FALSE	NA	NA	NA	NA	NA	none	31.91848622	0	1
ENSG00000024422.12	+	EHD2	protein_coding	chr19	47710422	21	1.789527789	expressed	low	0	0.600646738	3.174557311	0	FALSE	NA	NA	NA	NA	NA	none	7.013852236	0	1
ENSG00000024526.17	-	DEPDC1	protein_coding	chr1	68494222	35	13.30282146	expressed	low	0	6.162071546	18.71538194	0	FALSE	NA	NA	NA	NA	NA	none	0	0	1
ENSG00000024862.17	+	CCDC28A	protein_coding	chr6	138770509	28	16.60210995	expressed	low	0	5.277524843	11.15094684	0	FALSE	NA	NA	NA	NA	NA	none	0	0	1
ENSG00000025039.15	-	RRAGD	protein_coding	chr6	89409274	2	0.014108334	expressed	low	0	0.022282487	0.186326701	0	FALSE	NA	NA	NA	NA	NA	none	1.203392604	1	0
ENSG00000025156.13	+	HSF2	protein_coding	chr6	122396551	24	23.41840783	expressed	low	0	3.126935265	9.86589349	0	FALSE	NA	NA	NA	NA	NA	none	11.98090196	0	1
ENSG00000025293.17	+	PHF20	protein_coding	chr20	35768974	32	9.443261098	expressed	low	0	12.08520931	26.15354656	0	FALSE	NA	NA	NA	NA	NA	none	46.41884956	0	1
ENSG00000025423.11	+	HSD17B6	protein_coding	chr12	56749161	45	0.488047919	expressed	low	0	25.80756329	41.55774554	0	FALSE	NA	NA	NA	NA	NA	none	0.956086074	0	1
ENSG00000025434.19	+	NR1H3	protein_coding	chr11	47245300	47	3.25512521	expressed	low	0	13.23595445	16.70729417	0	FALSE	NA	NA	NA	NA	NA	none	5.001224859	0	1
ENSG00000025708.14	-	TYMP	protein_coding	chr22	50527033	31	0.662406333	expressed	low	0	1.843749053	2.77101189	0	FALSE	NA	NA	NA	NA	NA	none	1.069797324	0	1
ENSG00000025770.19	+	NCAPH2	protein_coding	chr22	50505224	43	24.49100948	expressed	low	0	28.56715024	32.22982762	0	FALSE	2	ENSG00000100258.18;ENSG00000025770.19	LMF2;NCAPH2	protein_coding;protein_coding	-;+	bidirectional	1.196764594	0	1
ENSG00000025772.8	-	TOMM34	protein_coding	chr20	44957398	46	28.5672113	expressed	low	0	7.725963029	14.84402716	0	FALSE	NA	NA	NA	NA	NA	none	25.26668684	0	1
ENSG00000025796.14	-	SEC63	protein_coding	chr6	107955209	43	4.424241425	expressed	low	0	9.411172859	13.96455422	0	FALSE	NA	NA	NA	NA	NA	none	0.361017781	0	1
ENSG00000025800.14	+	KPNA6	protein_coding	chr1	32105056	50	19.88600665	expressed	low	0	4.940665117	7.054259347	0	FALSE	NA	NA	NA	NA	NA	none	31.51210745	0	1
ENSG00000026025.16	+	VIM	protein_coding	chr10	17225241	74	119.620496	expressed	low	0	422.3129245	784.6838458	0	FALSE	NA	NA	NA	NA	NA	none	0.601696302	0	1
ENSG00000026036.22	+	RTEL1-TNFRSF6B	protein_coding	chr20	63656300	43	0.930021086	expressed	low	0	15.09721229	26.28107231	0	FALSE	3	ENSG00000197457.10;ENSG00000258366.8;ENSG00000026036.22	STMN3;RTEL1;RTEL1-TNFRSF6B	protein_coding;protein_coding;protein_coding	-;+;+	multiple_nearby_promoters	7.889367109	0	1
ENSG00000026103.22	+	FAS	protein_coding	chr10	88987531	6	0.074993252	expressed	low	0	0.114838544	0.431893429	0	FALSE	NA	NA	NA	NA	NA	none	0	1	0
ENSG00000026297.15	-	RNASET2	protein_coding	chr6	166954192	40	18.40139063	expressed	low	0	58.05975839	63.99874313	0	FALSE	NA	NA	NA	NA	NA	none	2.259933909	0	1
ENSG00000026508.18	+	CD44	protein_coding	chr11	35135870	2	0.601487188	expressed	low	0	1.203382841	1.675057356	0	FALSE	2	ENSG00000255521.2;ENSG00000026508.18	AL356215.1;CD44	lncRNA;protein_coding	-;+	bidirectional	0.12033926	1	0
ENSG00000026559.14	-	KCNG1	protein_coding	chr20	51020108	6	0.52302472	expressed	low	0	1.707045381	4.658167519	0	FALSE	NA	NA	NA	NA	NA	none	8.879628314	1	0
ENSG00000026652.15	-	AGPAT4	protein_coding	chr6	161271062	46	2.617689694	expressed	low	0	1.698875686	3.85256869	0	FALSE	NA	NA	NA	NA	NA	none	9.293670175	0	1
ENSG00000026751.17	+	SLAMF7	protein_coding	chr1	160736057	13	0.047786799	expressed	low	0	0.031935444	0.20726667	0	FALSE	NA	NA	NA	NA	NA	none	0.240678521	0	0
ENSG00000026950.17	+	BTN3A1	protein_coding	chr6	26399237	29	3.78701571	expressed	low	0	2.635377569	3.983017183	0	FALSE	NA	NA	NA	NA	NA	none	3.095680722	0	1
ENSG00000027001.10	-	MIPEP	protein_coding	chr13	23886401	22	7.107930726	expressed	low	0	2.82701779	4.808586743	0	FALSE	NA	NA	NA	NA	NA	none	0	0	1
ENSG00000027075.15	+	PRKCH	protein_coding	chr14	61184559	3	1.415491635	expressed	low	0	0	0.0621089	0	FALSE	NA	NA	NA	NA	NA	none	0	1	0
ENSG00000027644.5	-	INSRR	protein_coding	chr1	156856118	18	0.123610817	expressed	low	0	2.7497795	5.776127724	0	FALSE	NA	NA	NA	NA	NA	none	7.615548539	0	1
ENSG00000027697.14	-	IFNGR1	protein_coding	chr6	137216450	35	17.70239433	expressed	low	0	4.669842094	12.15509676	0	FALSE	NA	NA	NA	NA	NA	none	16.23357922	0	1
ENSG00000027847.14	+	B4GALT7	protein_coding	chr5	177597132	25	4.214628522	expressed	low	0	4.052195415	5.2729935	0	FALSE	NA	NA	NA	NA	NA	none	70.63769327	0	1
ENSG00000027869.11	-	SH2D2A	protein_coding	chr1	156813863	50	4.314333019	expressed	low	0	5.465605881	9.604381018	0	FALSE	NA	NA	NA	NA	NA	none	0.12033926	0	1
ENSG00000028116.17	+	VRK2	protein_coding	chr2	57904629	0	18.37360713	expressed	low	0	0	0.047988159	0	FALSE	NA	NA	NA	NA	NA	none	0.474729032	1	0
ENSG00000028137.19	+	TNFRSF1B	protein_coding	chr1	12163991	32	20.48230277	expressed	low	0	3.807372002	7.382150103	0	FALSE	2	ENSG00000283789.1;ENSG00000028137.19	MIR7846;TNFRSF1B	miRNA;protein_coding	+;+	nearby_same_strand	47.89150289	0	1
ENSG00000028203.18	+	VEZT	protein_coding	chr12	95214746	38	9.025218005	expressed	low	0	3.884859321	7.534140936	0	FALSE	2	ENSG00000180263.14;ENSG00000028203.18	FGD6;VEZT	protein_coding;protein_coding	-;+	bidirectional	0	0	1
ENSG00000028277.21	-	POU2F2	protein_coding	chr19	42193586	25	0.045853624	expressed	low	0	23.74791335	28.14278132	0	FALSE	NA	NA	NA	NA	NA	none	36.28590981	0	1
ENSG00000028310.18	-	BRD9	protein_coding	chr5	889802	37	12.6011249	expressed	low	0	36.45274489	50.6145208	0	FALSE	2	ENSG00000028310.18;ENSG00000071539.14	BRD9;TRIP13	protein_coding;protein_coding	-;+	bidirectional	1.069797324	0	1
ENSG00000028528.15	+	SNX1	protein_coding	chr15	64091123	66	5.74192487	expressed	low	0	45.82426745	56.99833424	0	TRUE	2	ENSG00000166797.11;ENSG00000028528.15	CIAO2A;SNX1	protein_coding;protein_coding	-;+	bidirectional	0.481357042	0	1
ENSG00000028839.10	+	TBPL1	protein_coding	chr6	133949170	57	19.86749268	expressed	low	0	13.86224254	26.39348735	0	TRUE	NA	NA	NA	NA	NA	none	42.04997337	0	1
ENSG00000029153.14	+	ARNTL2	protein_coding	chr12	27329854	4	0.140527742	expressed	low	0	0.077798322	0.346563591	0	FALSE	NA	NA	NA	NA	NA	none	2.019255388	1	0
ENSG00000029363.17	-	BCLAF1	protein_coding	chr6	136286852	62	67.21760147	expressed	low	0	9.774899088	39.35029024	0	TRUE	NA	NA	NA	NA	NA	none	68.49706355	0	1
ENSG00000029364.12	+	SLC39A9	protein_coding	chr14	69395015	49	18.23210598	expressed	low	0	49.52464909	121.3437987	0	FALSE	NA	NA	NA	NA	NA	none	0.595068292	0	1
ENSG00000029534.20	-	ANK1	protein_coding	chr8	41893763	7	27.71032087	expressed	low	0	0	0.048459984	0	FALSE	NA	NA	NA	NA	NA	none	0.481357042	1	0
ENSG00000029559.7	+	IBSP	protein_coding	chr4	87796554	0	0	off	low	0	0.071282785	0.287928953	0	FALSE	NA	NA	NA	NA	NA	none	0	0	0
ENSG00000029639.11	-	TFB1M	protein_coding	chr6	155311494	67	9.221041332	expressed	low	0	4.96757791	12.86082657	0	FALSE	NA	NA	NA	NA	NA	none	27.44604955	0	1
ENSG00000029725.17	+	RABEP1	protein_coding	chr17	5279265	30	13.5903561	expressed	low	0	3.127461837	6.670354077	0	FALSE	NA	NA	NA	NA	NA	none	23.39428276	0	1
ENSG00000029993.15	+	HMGB3	protein_coding	chrX	150977509	13	26.37638069	expressed	low	0	5.778091228	13.86254364	0	FALSE	NA	NA	NA	NA	NA	none	5.2551594	0	1
ENSG00000030066.13	-	NUP160	protein_coding	chr11	47845556	35	22.33275838	expressed	low	0	10.38028279	13.59669355	0	FALSE	NA	NA	NA	NA	NA	none	32.03882548	0	1
ENSG00000030110.13	-	BAK1	protein_coding	chr6	33577294	25	19.10159113	expressed	low	0	6.802433326	11.27530685	0	FALSE	NA	NA	NA	NA	NA	none	29.41228086	0	1
ENSG00000030304.14	+	MUSK	protein_coding	chr9	110665779	0	0	off	low	0	0	0.115521197	0	FALSE	NA	NA	NA	NA	NA	none	0.240678521	0	0
ENSG00000030419.16	-	IKZF2	protein_coding	chr2	213149428	7	0.155837246	expressed	low	0	0.172257816	0.527869747	0	FALSE	2	ENSG00000030419.16;ENSG00000270659.1	IKZF2;AC079610.1	protein_coding;lncRNA	-;+	bidirectional	0	0	0
ENSG00000030582.18	+	GRN	protein_coding	chr17	44342246	24	11.87508742	expressed	low	0	4.396212232	7.701503632	0	FALSE	NA	NA	NA	NA	NA	none	11.68057135	0	1
ENSG00000031003.10	-	FAM13B	protein_coding	chr5	138048962	8	8.422666862	expressed	low	0	0.018753033	0.095976318	0	FALSE	NA	NA	NA	NA	NA	none	0.595068292	0	0
ENSG00000031081.11	+	ARHGAP31	protein_coding	chr3	119291383	6	0.039627978	expressed	low	0	0.013182411	0.124217801	0	FALSE	NA	NA	NA	NA	NA	none	0.835746813	1	0
ENSG00000031691.7	+	CENPQ	protein_coding	chr6	49460370	44	20.96421396	expressed	low	0	4.606446323	10.17348967	0	FALSE	2	ENSG00000146085.8;ENSG00000031691.7	MMUT;CENPQ	protein_coding;protein_coding	-;+	bidirectional	0.468101022	0	1
ENSG00000031698.13	+	SARS	protein_coding	chr1	109210918	57	144.5622241	expressed	low	0	116.5240368	481.8408482	0	FALSE	NA	NA	NA	NA	NA	none	51.57210113	0	1
ENSG00000031823.14	-	RANBP3	protein_coding	chr19	5975143	35	7.461209137	expressed	low	0	7.221942103	17.14637389	0	FALSE	2	ENSG00000031823.14;ENSG00000266983.1	RANBP3;AC011444.1	protein_coding;lncRNA	-;+	bidirectional	1.323731865	0	1
ENSG00000032219.19	+	ARID4A	protein_coding	chr14	58295504	55	3.517255044	expressed	low	0	7.297103558	22.41047017	0	FALSE	3	ENSG00000139971.15;ENSG00000257621.8;ENSG00000032219.19	ARMH4;PSMA3-AS1;ARID4A	protein_coding;lncRNA;protein_coding	-;-;+	multiple_nearby_promoters	0	0	1
ENSG00000032389.12	-	EIPR1	protein_coding	chr2	3374883	59	12.34301597	expressed	low	0	8.089421928	16.62278693	0	FALSE	2	ENSG00000032389.12;ENSG00000171853.16	EIPR1;TRAPPC12	protein_coding;protein_coding	-;+	bidirectional	1.791832887	0	1
ENSG00000032444.16	+	PNPLA6	protein_coding	chr19	7531004	30	3.878210698	expressed	low	0	5.733989955	9.067899437	0	FALSE	2	ENSG00000268614.1;ENSG00000032444.16	AC008878.2;PNPLA6	protein_coding;protein_coding	+;+	nearby_same_strand	0.234050511	0	1
ENSG00000032742.17	+	IFT88	protein_coding	chr13	20564069	33	4.894262584	expressed	low	0	1.823212894	4.601320073	0	FALSE	2	ENSG00000277020.4;ENSG00000032742.17	AL590096.1;IFT88	lncRNA;protein_coding	-;+	bidirectional	0	0	1
ENSG00000033011.12	+	ALG1	protein_coding	chr16	5030923	23	5.713537895	expressed	low	0	3.682453216	4.033817735	0	FALSE	NA	NA	NA	NA	NA	none	0.601696302	1	1
ENSG00000033030.14	-	ZCCHC8	protein_coding	chr12	122498074	49	10.54281113	expressed	low	0	14.17735237	21.55178839	0	FALSE	2	ENSG00000033030.14;ENSG00000275265.1	ZCCHC8;AC127002.2	protein_coding;lncRNA	-;+	bidirectional	0.354389771	0	1
ENSG00000033050.9	-	ABCF2	protein_coding	chr7	151224206	44	17.5131075	expressed	low	0	57.76748558	101.7741745	0	FALSE	2	ENSG00000285292.1;ENSG00000033050.9	ABCF2;ABCF2	protein_coding;protein_coding	-;-	nearby_same_strand	0	0	1
ENSG00000033100.16	+	CHPF2	protein_coding	chr7	151229489	29	17.1896809	expressed	low	0	25.61968296	39.54224287	0	FALSE	NA	NA	NA	NA	NA	none	53.04724214	0	1
ENSG00000033122.20	+	LRRC7	protein_coding	chr1	69565261	20	0.370624139	expressed	low	0	1.471662586	2.984640047	0	FALSE	NA	NA	NA	NA	NA	none	26.05500251	0	1
ENSG00000033170.16	+	FUT8	protein_coding	chr14	65407592	13	4.109254264	expressed	low	0	1.282207686	2.570106708	0	FALSE	NA	NA	NA	NA	NA	none	0.12033926	0	1
ENSG00000033178.13	-	UBA6	protein_coding	chr4	67698156	65	35.58456584	expressed	low	0	10.40835442	31.33626771	0	TRUE	2	ENSG00000033178.13;ENSG00000248049.7	UBA6;UBA6-AS1	protein_coding;lncRNA	-;+	bidirectional	0	0	1
ENSG00000033327.13	-	GAB2	protein_coding	chr11	78415349	61	17.13225213	expressed	low	0	3.85358056	6.766330394	0	FALSE	NA	NA	NA	NA	NA	none	75.74703645	0	1
ENSG00000033627.16	+	ATP6V0A1	protein_coding	chr17	42455844	71	13.68804655	expressed	low	0	10.91969125	16.08389359	0	FALSE	NA	NA	NA	NA	NA	none	26.65110588	0	1
ENSG00000033800.13	+	PIAS1	protein_coding	chr15	68051179	50	3.592841495	expressed	low	0	2.947756807	5.854555377	0	FALSE	NA	NA	NA	NA	NA	none	25.23251171	0	1
ENSG00000033867.16	-	SLC4A7	protein_coding	chr3	27481421	14	3.152992501	expressed	low	0	0.673450537	2.351419782	0	FALSE	2	ENSG00000033867.16;ENSG00000230807.1	SLC4A7;AC099535.1	protein_coding;processed_pseudogene	-;+	bidirectional	9.547604716	0	1
ENSG00000034053.14	+	APBA2	protein_coding	chr15	28881483	16	12.26646309	expressed	low	0	2.304802736	3.927842097	0	FALSE	NA	NA	NA	NA	NA	none	0	0	1
ENSG00000034152.19	+	MAP2K3	protein_coding	chr17	21281672	18	0.861674041	expressed	low	0	0.756963268	2.794671111	0	FALSE	NA	NA	NA	NA	NA	none	11.80753862	0	0
ENSG00000034239.11	-	EFCAB1	protein_coding	chr8	48732312	2	0	off	low	0	0	0.012114996	0	FALSE	NA	NA	NA	NA	NA	none	0	1	0
ENSG00000034510.6	+	TMSB10	protein_coding	chr2	84902656	46	959.9475343	expressed	low	0	312.6595479	1861.031087	0	FALSE	NA	NA	NA	NA	NA	none	0.702151533	0	1
ENSG00000034533.11	-	ASTE1	protein_coding	chr3	131024650	20	3.825781141	expressed	low	0	4.295316203	7.918046206	0	FALSE	NA	NA	NA	NA	NA	none	0.12033926	0	1
ENSG00000034677.13	-	RNF19A	protein_coding	chr8	100333219	4	10.28393648	expressed	low	0	0	0	0	FALSE	2	ENSG00000034677.13;ENSG00000253217.1	RNF19A;AP001574.1	protein_coding;lncRNA	-;+	bidirectional	0	1	0
ENSG00000034693.15	+	PEX3	protein_coding	chr6	143447805	51	12.49218866	expressed	low	0	14.42493542	19.38721617	0	FALSE	3	ENSG00000189007.16;ENSG00000223203.1;ENSG00000034693.15	ADAT2;RNA5SP221;PEX3	protein_coding;rRNA_pseudogene;protein_coding	-;+;+	multiple_nearby_promoters	0	0	1
ENSG00000034713.8	+	GABARAPL2	protein_coding	chr16	75563375	40	26.41723748	expressed	low	0	43.01173174	50.68086261	0	FALSE	NA	NA	NA	NA	NA	none	20.30523005	0	1
ENSG00000034971.17	-	MYOC	protein_coding	chr1	171649689	2	0.011902221	expressed	low	0	0	0.047988159	0	FALSE	NA	NA	NA	NA	NA	none	0.474729032	1	0
ENSG00000035115.22	-	SH3YL1	protein_coding	chr2	263399	26	0.862488324	expressed	low	0	28.0803827	37.60214962	0	FALSE	NA	NA	NA	NA	NA	none	5.007852869	0	1
ENSG00000035141.8	-	FAM136A	protein_coding	chr2	70299091	36	45.48159675	expressed	low	0	24.08271566	32.04342718	0	FALSE	NA	NA	NA	NA	NA	none	0.12033926	0	1
ENSG00000035403.17	+	VCL	protein_coding	chr10	73992193	73	58.02596157	expressed	low	0	9.502776913	15.11627003	0	TRUE	NA	NA	NA	NA	NA	none	3.108936742	0	1
ENSG00000035499.13	-	DEPDC1B	protein_coding	chr5	60697191	40	18.49642121	expressed	low	0	5.620527837	9.403209594	0	FALSE	NA	NA	NA	NA	NA	none	0.354389771	0	1
ENSG00000035664.11	-	DAPK2	protein_coding	chr15	64069034	27	0.460386717	expressed	low	0	64.40914198	92.3283836	0	FALSE	NA	NA	NA	NA	NA	none	20.82739023	0	1
ENSG00000035681.9	-	NSMAF	protein_coding	chr8	58656854	60	19.9848763	expressed	low	0	6.108168326	12.57289761	0	FALSE	NA	NA	NA	NA	NA	none	47.85069975	0	1
ENSG00000035687.10	-	ADSS	protein_coding	chr1	244448910	46	41.4378726	expressed	low	0	14.50681005	25.74252041	0	FALSE	NA	NA	NA	NA	NA	none	12.34191975	0	1
ENSG00000035720.8	+	STAP1	protein_coding	chr4	67555727	2	3.547477164	expressed	low	0	0.760249284	1.295680288	0	FALSE	NA	NA	NA	NA	NA	none	0.12033926	0	0
ENSG00000035862.12	-	TIMP2	protein_coding	chr17	78922388	1	0.003869593	expressed	low	0	0	0.0621089	0	FALSE	NA	NA	NA	NA	NA	none	2.520496459	1	0
ENSG00000035928.16	-	RFC1	protein_coding	chr4	39363376	61	25.55012355	expressed	low	0	4.10136018	6.839800109	0	FALSE	NA	NA	NA	NA	NA	none	8.751625962	0	1
ENSG00000036054.13	+	TBC1D23	protein_coding	chr3	100257992	46	24.87025686	expressed	low	0	5.462179884	10.07751335	0	FALSE	2	ENSG00000287378.1;ENSG00000036054.13	AC129803.1;TBC1D23	lncRNA;protein_coding	-;+	bidirectional	1.196764594	0	1
ENSG00000036257.13	-	CUL3	protein_coding	chr2	224582398	36	5.299438792	expressed	low	0	5.003463709	10.96776587	0	FALSE	NA	NA	NA	NA	NA	none	22.99246184	0	1
ENSG00000036448.10	+	MYOM2	protein_coding	chr8	2042046	0	0.140323585	expressed	low	0	0	0	0	FALSE	NA	NA	NA	NA	NA	none	0	1	0
ENSG00000036473.8	+	OTC	protein_coding	chrX	38349586	0	0	off	low	0	0	0.124217801	0	FALSE	NA	NA	NA	NA	NA	none	0.12033926	0	0
ENSG00000036530.9	+	CYP46A1	protein_coding	chr14	99681298	16	0.00500531	expressed	low	0	0.163233888	0.267389846	0	FALSE	NA	NA	NA	NA	NA	none	16.2203232	1	1
ENSG00000036549.13	-	AC118549.1	protein_coding	chr1	77680420	45	17.23678861	expressed	low	0	5.131103916	10.6053831	0	FALSE	NA	NA	NA	NA	NA	none	45.91305064	0	1
ENSG00000036565.15	-	SLC18A1	protein_coding	chr8	20180207	0	0.025618694	expressed	low	0	0	0.053806056	0	FALSE	NA	NA	NA	NA	NA	none	0.361017781	1	0
ENSG00000036672.16	-	USP2	protein_coding	chr11	119378712	40	1.235844802	expressed	low	0	1.820598039	2.135550566	0	FALSE	NA	NA	NA	NA	NA	none	13.49228827	0	1
ENSG00000036828.16	+	CASR	protein_coding	chr3	122180683	0	0.001815695	expressed	low	0	0	0	0	FALSE	NA	NA	NA	NA	NA	none	0	1	0
ENSG00000037042.9	+	TUBG2	protein_coding	chr17	42656284	22	2.991443228	expressed	low	0	4.385910723	15.1332768	0	FALSE	NA	NA	NA	NA	NA	none	6.117418253	0	0
ENSG00000037241.7	+	RPL26L1	protein_coding	chr5	172955729	45	33.66087995	expressed	low	0	18.27667239	30.44498465	0	FALSE	NA	NA	NA	NA	NA	none	0	0	1
ENSG00000037280.16	-	FLT4	protein_coding	chr5	180646625	2	0.020432563	expressed	low	0	0	0.026364822	0	FALSE	NA	NA	NA	NA	NA	none	0.240678521	1	0
ENSG00000037474.15	-	NSUN2	protein_coding	chr5	6630292	36	58.63632723	expressed	low	0	37.86751734	56.77866832	0	FALSE	2	ENSG00000037474.15;ENSG00000145545.12	NSUN2;SRD5A1	protein_coding;protein_coding	-;+	bidirectional	1.785204877	0	1
ENSG00000037637.11	-	FBXO42	protein_coding	chr1	16349481	56	6.913674618	expressed	low	0	4.421675202	8.109998842	0	FALSE	2	ENSG00000037637.11;ENSG00000055070.17	FBXO42;SZRD1	protein_coding;protein_coding	-;+	bidirectional	0	0	1
ENSG00000037749.12	+	MFAP3	protein_coding	chr5	154035906	45	6.371332519	expressed	low	0	4.59897554	11.4211818	0	FALSE	NA	NA	NA	NA	NA	none	0	0	1
ENSG00000037757.14	+	MRI1	protein_coding	chr19	13761522	29	10.90775174	expressed	low	0	26.35095348	34.06334976	0	FALSE	NA	NA	NA	NA	NA	none	56.83078329	0	1
ENSG00000037897.17	-	METTL1	protein_coding	chr12	57769120	46	10.49165735	expressed	low	0	18.63568834	21.6474363	0	FALSE	2	ENSG00000037897.17;ENSG00000257921.6	METTL1;AC025165.3	protein_coding;protein_coding	-;+	bidirectional	0	0	1
ENSG00000037965.6	+	HOXC8	protein_coding	chr12	54005985	19	0.204153571	expressed	low	0	1.711215572	3.974969616	0	FALSE	NA	NA	NA	NA	NA	none	5.095052079	0	1
ENSG00000038002.9	-	AGA	protein_coding	chr4	177439438	49	7.918434294	expressed	low	0	7.314715844	30.80601453	0	FALSE	2	ENSG00000038002.9;ENSG00000250131.2	AGA;AC078881.1	protein_coding;lncRNA	-;+	bidirectional	0	0	1
ENSG00000038210.14	+	PI4K2B	protein_coding	chr4	25157663	53	16.4482762	expressed	low	0	7.269253254	11.03727653	0	FALSE	3	ENSG00000109618.12;ENSG00000281501.1;ENSG00000038210.14	SEPSECS;SEPSECS-AS1;PI4K2B	protein_coding;lncRNA;protein_coding	-;+;+	multiple_nearby_promoters	0	0	1
ENSG00000038219.13	-	BOD1L1	protein_coding	chr4	13624726	39	5.183538847	expressed	low	0	3.783136684	6.670354077	0	FALSE	2	ENSG00000038219.13;ENSG00000266240.1	BOD1L1;MIR5091	protein_coding;miRNA	-;+	bidirectional	22.77933044	0	1
ENSG00000038274.17	+	MAT2B	protein_coding	chr5	163500114	51	18.399364	expressed	low	0	7.278893398	11.6676409	0	FALSE	NA	NA	NA	NA	NA	none	43.51952145	0	1
ENSG00000038295.8	+	TLL1	protein_coding	chr4	165870237	0	0	off	low	0	0	0	0	FALSE	NA	NA	NA	NA	NA	none	0	1	0
ENSG00000038358.15	+	EDC4	protein_coding	chr16	67870052	30	18.79779225	expressed	low	0	79.78871666	83.61503318	0	FALSE	NA	NA	NA	NA	NA	none	122.8659674	0	1
ENSG00000038382.20	+	TRIO	protein_coding	chr5	14140342	7	0.31367359	expressed	low	0	0.088007216	0.242127253	0	FALSE	NA	NA	NA	NA	NA	none	3.704005034	1	0
ENSG00000038427.16	+	VCAN	protein_coding	chr5	83468618	18	0.024486294	expressed	low	0	0	0.047988159	0	FALSE	NA	NA	NA	NA	NA	none	1.918800157	1	0
ENSG00000038532.16	+	CLEC16A	protein_coding	chr16	10941564	29	2.200481067	expressed	low	0	14.03264529	16.4516488	0	FALSE	NA	NA	NA	NA	NA	none	2.273189928	0	1
ENSG00000038945.15	-	MSR1	protein_coding	chr8	16564491	21	0.362126729	expressed	low	0	0.070601683	0.497440008	0	FALSE	NA	NA	NA	NA	NA	none	0.12033926	0	0
ENSG00000039068.19	+	CDH1	protein_coding	chr16	68734292	14	0.019984681	expressed	low	0	0.037506065	0.215224224	0	FALSE	NA	NA	NA	NA	NA	none	0.949458064	0	0
ENSG00000039123.16	+	MTREX	protein_coding	chr5	55304989	49	63.86203749	expressed	low	0	23.78382222	44.85250738	0	FALSE	2	ENSG00000067248.10;ENSG00000039123.16	DHX29;MTREX	protein_coding;protein_coding	-;+	bidirectional	0.595068292	0	1
ENSG00000039139.9	-	DNAH5	protein_coding	chr5	13941544	0	0.005686154	expressed	low	0	0	0	0	FALSE	NA	NA	NA	NA	NA	none	0	0	0
ENSG00000039319.17	+	ZFYVE16	protein_coding	chr5	80405013	41	4.980877249	expressed	low	0	2.127429741	4.103880065	0	FALSE	NA	NA	NA	NA	NA	none	40.59161114	0	1
ENSG00000039523.20	+	RIPOR1	protein_coding	chr16	67515418	13	0.539918289	expressed	low	0	0.259610745	0.395472327	0	FALSE	NA	NA	NA	NA	NA	none	1.912172147	0	1
ENSG00000039537.13	-	C6	protein_coding	chr5	41258439	0	0	off	low	0	0	0	0	FALSE	NA	NA	NA	NA	NA	none	0.12033926	0	0
ENSG00000039560.14	+	RAI14	protein_coding	chr5	34653328	29	8.812167309	expressed	low	0	2.819056424	4.96741147	0	FALSE	NA	NA	NA	NA	NA	none	0	0	1
ENSG00000039600.11	-	SOX30	protein_coding	chr5	157668481	3	0.006247468	expressed	low	0	0	0.047988159	0	FALSE	2	ENSG00000039600.11;ENSG00000187658.7	SOX30;C5orf52	protein_coding;protein_coding	-;+	bidirectional	0	1	0
ENSG00000039650.12	-	PNKP	protein_coding	chr19	49875352	60	8.845635776	expressed	low	0	17.14125619	24.78293249	0	TRUE	2	ENSG00000039650.12;ENSG00000204673.10	PNKP;AKT1S1	protein_coding;protein_coding	-;-	nearby_same_strand	0	0	1
ENSG00000039987.6	+	BEST2	protein_coding	chr19	12748702	5	0.008237875	expressed	low	0	0.055783327	0.191952635	0	FALSE	NA	NA	NA	NA	NA	none	20.35162612	1	0
ENSG00000040199.18	-	PHLPP2	protein_coding	chr16	71721702	26	1.267401633	expressed	low	0	0.346241024	0.959763177	0	FALSE	NA	NA	NA	NA	NA	none	0	0	1
ENSG00000040275.17	+	SPDL1	protein_coding	chr5	169580636	26	17.56730712	expressed	low	0	8.063248109	15.4220798	0	FALSE	NA	NA	NA	NA	NA	none	15.05669866	0	1
ENSG00000040341.18	-	STAU2	protein_coding	chr8	73744709	47	8.358594153	expressed	low	0	4.449855971	7.515176931	0	FALSE	NA	NA	NA	NA	NA	none	41.27284356	0	1
ENSG00000040487.13	+	SLC66A1	protein_coding	chr1	19309326	54	12.54208527	expressed	low	0	14.85444045	19.7468226	0	FALSE	2	ENSG00000053371.12;ENSG00000040487.13	AKR7A2;SLC66A1	protein_coding;protein_coding	-;+	bidirectional	0.956086074	0	1
ENSG00000040531.14	+	CTNS	protein_coding	chr17	3633468	27	3.122124552	expressed	low	0	3.007866544	4.932946745	0	FALSE	3	ENSG00000262304.2;ENSG00000197417.8;ENSG00000040531.14	AC027796.3;SHPK;CTNS	protein_coding;protein_coding;protein_coding	-;-;+	multiple_nearby_promoters	0.12033926	0	1
ENSG00000040608.14	-	RTN4R	protein_coding	chr22	20280247	7	0.447441142	expressed	low	0	0	0	0	FALSE	NA	NA	NA	NA	NA	none	0	1	0
ENSG00000040633.13	-	PHF23	protein_coding	chr17	7236723	52	20.13278009	expressed	low	0	66.87878768	109.8706446	0	FALSE	NA	NA	NA	NA	NA	none	60.33284278	0	1
ENSG00000040731.10	-	CDH10	protein_coding	chr5	24641979	1	0	off	low	0	0	0	0	FALSE	NA	NA	NA	NA	NA	none	0	0	0
ENSG00000040933.15	+	INPP4A	protein_coding	chr2	98441854	30	3.112014293	expressed	low	0	0.847276412	2.255443465	0	FALSE	NA	NA	NA	NA	NA	none	18.96720708	0	1
ENSG00000041353.10	+	RAB27B	protein_coding	chr18	54714860	1	8.766566617	expressed	low	0	0.270426139	2.207455306	0	FALSE	NA	NA	NA	NA	NA	none	0.12033926	0	0
ENSG00000041357.16	+	PSMA4	protein_coding	chr15	78537405	37	69.32238444	expressed	low	0	124.8138225	171.4334563	0	FALSE	NA	NA	NA	NA	NA	none	52.27114742	0	1
ENSG00000041515.16	+	MYO16	protein_coding	chr13	108593152	0	4.162320856	expressed	low	0	0.031354905	0.335917112	0	FALSE	NA	NA	NA	NA	NA	none	0.240678521	0	0
ENSG00000041802.11	-	LSG1	protein_coding	chr3	194669464	47	27.10813274	expressed	low	0	7.239852828	15.59536159	0	FALSE	NA	NA	NA	NA	NA	none	12.0879852	0	1
ENSG00000041880.14	+	PARP3	protein_coding	chr3	51939345	28	2.236591088	expressed	low	0	12.3351998	20.99280829	0	FALSE	2	ENSG00000114767.7;ENSG00000041880.14	RRP9;PARP3	protein_coding;protein_coding	-;+	bidirectional	1.664865616	0	1
ENSG00000041982.16	-	TNC	protein_coding	chr9	115115258	0	0.011306887	expressed	low	0	0	0	0	FALSE	NA	NA	NA	NA	NA	none	0.361017781	0	0
ENSG00000041988.15	+	THAP3	protein_coding	chr1	6621866	21	7.444644652	expressed	low	0	22.56504413	40.07452913	0	FALSE	NA	NA	NA	NA	NA	none	147.4315378	0	1
ENSG00000042062.13	-	RIPOR3	protein_coding	chr20	50688543	60	9.522978151	expressed	low	0	4.649111136	8.349939636	0	FALSE	NA	NA	NA	NA	NA	none	17.43800691	0	1
ENSG00000042088.14	+	TDP1	protein_coding	chr14	89951939	49	9.619052753	expressed	low	0	7.188371505	12.5603602	0	FALSE	3	ENSG00000259053.1;ENSG00000140025.16;ENSG00000042088.14	AL137230.2;EFCAB11;TDP1	lncRNA;protein_coding;protein_coding	-;-;+	multiple_nearby_promoters	0.715407553	0	1
ENSG00000042286.15	-	AIFM2	protein_coding	chr10	70129935	34	3.702855834	expressed	low	0	2.059639184	4.311146735	0	FALSE	NA	NA	NA	NA	NA	none	24.55127929	0	1
ENSG00000042304.11	-	C2orf83	protein_coding	chr2	227645607	0	0	off	low	0	0	0.012114996	0	FALSE	NA	NA	NA	NA	NA	none	0	1	0
ENSG00000042317.17	+	SPATA7	protein_coding	chr14	88381924	16	0.821433147	expressed	low	0	0.426907853	1.151715812	0	FALSE	NA	NA	NA	NA	NA	none	3.563781743	0	0
ENSG00000042429.12	+	MED17	protein_coding	chr11	93781227	38	1.453290797	expressed	low	0	5.32883786	14.55012023	0	FALSE	NA	NA	NA	NA	NA	none	0.240678521	0	1
ENSG00000042445.14	-	RETSAT	protein_coding	chr2	85351532	32	11.47098029	expressed	low	0	14.15780723	19.09928721	0	FALSE	NA	NA	NA	NA	NA	none	0	0	1
ENSG00000042493.16	-	CAPG	protein_coding	chr2	85415433	69	24.59887794	expressed	low	0	0.452627902	1.343668447	0	TRUE	3	ENSG00000042493.16;ENSG00000286011.1;ENSG00000152292.17	CAPG;AC062037.3;SH2D6	protein_coding;lncRNA;protein_coding	-;+;+	multiple_nearby_promoters	0	0	1
ENSG00000042753.11	-	AP2S1	protein_coding	chr19	46847993	39	75.72992378	expressed	low	0	20.67033518	24.72388279	0	FALSE	NA	NA	NA	NA	NA	none	28.07425789	0	1
ENSG00000042781.13	-	USH2A	protein_coding	chr1	216420449	1	0.071251877	expressed	low	0	0	0	0	FALSE	NA	NA	NA	NA	NA	none	0	0	0
ENSG00000042813.8	-	ZPBP	protein_coding	chr7	50118330	0	0.019079827	expressed	low	0	0.080447687	0.434762302	0	FALSE	NA	NA	NA	NA	NA	none	0.829118803	0	0
ENSG00000042832.12	+	TG	protein_coding	chr8	132863958	1	0.008706813	expressed	low	0	0	0.026903028	0	FALSE	NA	NA	NA	NA	NA	none	0.481357042	1	0
ENSG00000042980.13	+	ADAM28	protein_coding	chr8	24291069	2	0	off	low	0	0	0	0	FALSE	NA	NA	NA	NA	NA	none	0.361017781	0	0
ENSG00000043039.7	+	BARX2	protein_coding	chr11	129372848	0	0	off	low	0	0	0	0	FALSE	NA	NA	NA	NA	NA	none	0.12033926	1	0
ENSG00000043093.15	-	DCUN1D1	protein_coding	chr3	182982954	3	11.88349547	expressed	low	0	0.243550103	0.527869747	0	FALSE	NA	NA	NA	NA	NA	none	3.095680722	0	0
ENSG00000043143.20	+	JADE2	protein_coding	chr5	134521312	53	4.947539793	expressed	low	0	3.272682112	4.909650872	0	FALSE	2	ENSG00000280420.1;ENSG00000043143.20	AC005355.2;JADE2	TEC;protein_coding	-;+	bidirectional	75.6853142	0	1
ENSG00000043355.12	+	ZIC2	protein_coding	chr13	99978784	24	1.536051245	expressed	low	0	4.46393046	12.7520353	0	FALSE	2	ENSG00000288060.1;ENSG00000043355.12	AL355338.1;ZIC2	lncRNA;protein_coding	-;+	bidirectional	5.114936109	0	1
ENSG00000043462.12	-	LCP2	protein_coding	chr5	170294819	12	4.612101118	expressed	low	0	8.734798642	17.07994757	0	FALSE	NA	NA	NA	NA	NA	none	8.164220761	0	1
ENSG00000043514.17	-	TRIT1	protein_coding	chr1	39880512	34	22.58383114	expressed	low	0	8.954961446	20.06341365	0	FALSE	NA	NA	NA	NA	NA	none	25.39365412	0	1
ENSG00000043591.6	+	ADRB1	protein_coding	chr10	114040866	1	0.086372354	expressed	low	0	0.160895373	0.335917112	0	FALSE	NA	NA	NA	NA	NA	none	4.211874116	1	0
ENSG00000044012.4	+	GUCA2B	protein_coding	chr1	42150410	1	0	off	low	0	0	0.047988159	0	FALSE	NA	NA	NA	NA	NA	none	0.240678521	1	0
ENSG00000044090.8	-	CUL7	protein_coding	chr6	43050946	46	9.729152833	expressed	low	0	76.79113251	116.8716453	0	FALSE	NA	NA	NA	NA	NA	none	193.9932984	0	1
ENSG00000044115.21	+	CTNNA1	protein_coding	chr5	138607967	8	40.06596368	expressed	low	0	0	0.026903028	0	FALSE	NA	NA	NA	NA	NA	none	0.361017781	1	1
ENSG00000044446.12	-	PHKA2	protein_coding	chrX	18981115	36	4.457514711	expressed	low	0	3.82551891	5.852990439	0	FALSE	2	ENSG00000044446.12;ENSG00000286724.1	PHKA2;AL732509.1	protein_coding;lncRNA	-;+	bidirectional	0	0	1
ENSG00000044459.15	+	CNTLN	protein_coding	chr9	17131982	0	0	off	low	0	0	0.047988159	0	FALSE	NA	NA	NA	NA	NA	none	0.835746813	0	0
ENSG00000044524.11	+	EPHA3	protein_coding	chr3	89104621	1	0	off	low	0	0	0	0	FALSE	NA	NA	NA	NA	NA	none	0.12033926	0	0
ENSG00000044574.8	-	HSPA5	protein_coding	chr9	125238344	74	80.44350756	expressed	low	0	324.9725749	1647.93545	0	TRUE	2	ENSG00000044574.8;ENSG00000239705.2	HSPA5;AL354710.2	protein_coding;lncRNA	-;+	bidirectional	4.265933276	0	1
ENSG00000046604.13	+	DSG2	protein_coding	chr18	31495177	35	16.53965317	expressed	low	0	3.488988638	5.615186772	0	FALSE	2	ENSG00000266521.1;ENSG00000046604.13	AC021549.1;DSG2	lncRNA;protein_coding	-;+	bidirectional	1.537898346	0	1
ENSG00000046647.13	-	GEMIN8	protein_coding	chrX	14026894	51	7.725888377	expressed	low	0	7.235885251	9.146821889	0	FALSE	NA	NA	NA	NA	NA	none	16.58796899	0	1
ENSG00000046651.15	+	OFD1	protein_coding	chrX	13731745	28	13.96976488	expressed	low	0	13.36261972	22.71642703	0	FALSE	2	ENSG00000196459.14;ENSG00000046651.15	TRAPPC2;OFD1	protein_coding;protein_coding	-;+	bidirectional	0	0	1
ENSG00000046653.15	-	GPM6B	protein_coding	chrX	13935639	1	0.451616112	expressed	low	0	0	0.095976318	0	FALSE	NA	NA	NA	NA	NA	none	1.805088907	1	0
ENSG00000046774.10	-	MAGEC2	protein_coding	chrX	142202291	7	81.14203521	expressed	low	0	70.74443983	157.1910425	0	FALSE	NA	NA	NA	NA	NA	none	8.438039332	0	1
ENSG00000046889.19	+	PREX2	protein_coding	chr8	67949046	0	0.06941954	expressed	low	0	0	0.012114996	0	FALSE	NA	NA	NA	NA	NA	none	0.835746813	1	0
ENSG00000047056.16	+	WDR37	protein_coding	chr10	1046538	45	5.149790999	expressed	low	0	23.4569766	80.81913752	0	FALSE	2	ENSG00000067064.11;ENSG00000047056.16	IDI1;WDR37	protein_coding;protein_coding	-;+	bidirectional	1.196764594	0	1
ENSG00000047188.16	+	YTHDC2	protein_coding	chr5	113510694	40	7.338687494	expressed	low	0	2.973672988	12.66887393	0	FALSE	NA	NA	NA	NA	NA	none	18.15900739	0	1
ENSG00000047230.15	-	CTPS2	protein_coding	chrX	16709937	22	10.1907191	expressed	low	0	2.479524471	4.462898771	0	FALSE	NA	NA	NA	NA	NA	none	29.64633137	0	1
ENSG00000047249.18	-	ATP6V1H	protein_coding	chr8	53840559	51	14.24627417	expressed	low	0	13.66985011	31.73764803	0	FALSE	NA	NA	NA	NA	NA	none	18.78058772	0	1
ENSG00000047315.16	+	POLR2B	protein_coding	chr4	56974722	55	80.23827644	expressed	low	0	42.58688023	69.62407719	0	FALSE	2	ENSG00000084092.7;ENSG00000047315.16	NOA1;POLR2B	protein_coding;protein_coding	-;+	bidirectional	0.715407553	0	1
ENSG00000047346.12	-	FAM214A	protein_coding	chr15	52706818	1	1.019209763	expressed	low	0	0	0.026903028	0	FALSE	NA	NA	NA	NA	NA	none	0.481357042	0	0
ENSG00000047365.12	-	ARAP2	protein_coding	chr4	36241515	0	0.048289852	expressed	low	0	0	0.026364822	0	FALSE	NA	NA	NA	NA	NA	none	0	0	0
ENSG00000047410.14	-	TPR	protein_coding	chr1	186372694	67	69.52278559	expressed	low	0	41.65073418	82.19333165	0	FALSE	2	ENSG00000047410.14;ENSG00000157181.16	TPR;ODR4	protein_coding;protein_coding	-;+	bidirectional	0	0	1
ENSG00000047457.14	-	CP	protein_coding	chr3	149218830	6	0.08518471	expressed	low	0	0	0.107612112	0	FALSE	NA	NA	NA	NA	NA	none	0	0	1
ENSG00000047578.13	+	KIAA0556	protein_coding	chr16	27547133	45	2.458865863	expressed	low	0	4.047891318	9.492813484	0	FALSE	2	ENSG00000077235.18;ENSG00000047578.13	GTF3C1;KIAA0556	protein_coding;protein_coding	-;+	bidirectional	0.474729032	0	1
ENSG00000047579.19	-	DTNBP1	protein_coding	chr6	15660059	22	5.116400064	expressed	low	0	3.88206845	11.4365985	0	FALSE	NA	NA	NA	NA	NA	none	47.31528355	0	1
ENSG00000047597.7	+	XK	protein_coding	chrX	37682791	26	9.546048098	expressed	low	0	3.693081641	4.668181066	0	FALSE	NA	NA	NA	NA	NA	none	14.58859763	0	1
ENSG00000047617.15	-	ANO2	protein_coding	chr12	5943233	0	0.004003561	expressed	low	0	0	0	0	FALSE	NA	NA	NA	NA	NA	none	0.722035563	1	0
ENSG00000047621.12	-	C12orf4	protein_coding	chr12	4535509	31	7.675257809	expressed	low	0	7.867287562	15.83609241	0	FALSE	2	ENSG00000047621.12;ENSG00000111247.14	C12orf4;RAD51AP1	protein_coding;protein_coding	-;+	bidirectional	0	0	1
ENSG00000047634.15	+	SCML1	protein_coding	chrX	17734449	8	0	off	low	1	0	0	1	FALSE	NA	NA	NA	NA	NA	none	3.095680722	0	0
ENSG00000047644.18	+	WWC3	protein_coding	chrX	10012562	2	0.577254017	expressed	low	0	0.06134194	0.335917112	0	FALSE	NA	NA	NA	NA	NA	none	0.962714084	1	0
ENSG00000047648.23	-	ARHGAP6	protein_coding	chrX	11662921	0	7.920525578	expressed	low	0	0.040941857	0.239940794	0	FALSE	NA	NA	NA	NA	NA	none	0	1	0
ENSG00000047662.5	-	FAM184B	protein_coding	chr4	17778622	0	0.094184854	expressed	low	0	0	0.143964476	0	FALSE	NA	NA	NA	NA	NA	none	1.437443115	1	0
ENSG00000047849.21	-	MAP4	protein_coding	chr3	48086273	48	7.726239743	expressed	low	0	5.233801805	8.990404233	0	FALSE	NA	NA	NA	NA	NA	none	68.41089942	0	1
ENSG00000047932.14	-	GOPC	protein_coding	chr6	117599543	43	21.18721838	expressed	low	0	12.15115099	25.01033915	0	FALSE	NA	NA	NA	NA	NA	none	35.12787819	0	1
ENSG00000047936.10	-	ROS1	protein_coding	chr6	117422856	0	0.028985329	expressed	low	0	0	0.047988159	0	FALSE	NA	NA	NA	NA	NA	none	0.12033926	0	0
ENSG00000048028.11	-	USP28	protein_coding	chr11	113872571	47	9.75930096	expressed	low	0	1.785011177	3.2631948	0	FALSE	NA	NA	NA	NA	NA	none	28.38887961	0	1
ENSG00000048052.21	+	HDAC9	protein_coding	chr7	18083949	4	0.519376777	expressed	low	0	0.026633925	0.431893429	0	FALSE	NA	NA	NA	NA	NA	none	0.481357042	1	0
ENSG00000048140.18	+	TSPAN17	protein_coding	chr5	176644387	36	11.71327918	expressed	low	0	4.102508512	6.670299915	0	FALSE	NA	NA	NA	NA	NA	none	36.29046765	0	1
ENSG00000048162.20	-	NOP16	protein_coding	chr5	176385976	54	19.84124926	expressed	low	0	95.62594508	116.3298454	0	FALSE	NA	NA	NA	NA	NA	none	2.507240439	0	1
ENSG00000048342.16	+	CC2D2A	protein_coding	chr4	15466865	0	0.671954694	expressed	low	0	0.076959635	0.248720004	0	FALSE	NA	NA	NA	NA	NA	none	1.444071125	1	0
ENSG00000048392.11	-	RRM2B	protein_coding	chr8	102236119	47	11.73358519	expressed	low	0	4.534217931	8.397927795	0	FALSE	2	ENSG00000048392.11;ENSG00000246263.3	RRM2B;UBR5-AS1	protein_coding;lncRNA	-;+	bidirectional	0.240678521	0	1
ENSG00000048405.10	-	ZNF800	protein_coding	chr7	127428925	1	12.38645605	expressed	low	0	0	0.0621089	0	FALSE	NA	NA	NA	NA	NA	none	0.842374823	0	0
ENSG00000048462.11	+	TNFRSF17	protein_coding	chr16	11962210	11	0	off	low	1	0.057957478	0.133694923	0	FALSE	NA	NA	NA	NA	NA	none	0.474729032	0	0
ENSG00000048471.14	+	SNX29	protein_coding	chr16	11973734	43	2.394116504	expressed	low	0	0.963522771	1.583609241	0	FALSE	2	ENSG00000234719.9;ENSG00000048471.14	NPIPB2;SNX29	protein_coding;protein_coding	-;+	bidirectional	0	0	1
ENSG00000048540.15	-	LMO3	protein_coding	chr12	16607595	0	0.034636112	expressed	low	0	0.006057498	0.0621089	0	FALSE	NA	NA	NA	NA	NA	none	0.361017781	0	0
ENSG00000048544.6	-	MRPS10	protein_coding	chr6	42214862	46	67.49887092	expressed	low	0	7.43382519	13.19674368	0	FALSE	NA	NA	NA	NA	NA	none	18.21969456	0	1
ENSG00000048545.14	+	GUCA1A	protein_coding	chr6	42152406	11	0	off	low	1	0.050594814	0.124360002	0	FALSE	3	ENSG00000048545.14;ENSG00000287363.1;ENSG00000214732.2	GUCA1A;AL096814.2;AL096814.1	protein_coding;protein_coding;protein_coding	+;+;+	multiple_nearby_promoters	0	1	0
ENSG00000048649.13	-	RSF1	protein_coding	chr11	77818018	45	5.72472391	expressed	low	0	14.59017137	18.18644697	0	FALSE	2	ENSG00000048649.13;ENSG00000087884.14	RSF1;AAMDC	protein_coding;protein_coding	-;+	bidirectional	0	0	1
ENSG00000048707.15	+	VPS13D	protein_coding	chr1	12227030	19	13.9427875	expressed	low	0	1.009663252	3.274813385	0	FALSE	NA	NA	NA	NA	NA	none	44.47560753	0	1
ENSG00000048740.18	+	CELF2	protein_coding	chr10	10795397	1	5.829605451	expressed	low	0	0	0	0	FALSE	NA	NA	NA	NA	NA	none	0.601696302	1	0
ENSG00000048828.17	+	FAM120A	protein_coding	chr9	93448685	37	12.99154095	expressed	low	0	28.7037953	36.50740908	0	FALSE	NA	NA	NA	NA	NA	none	5.22864736	0	1
ENSG00000048991.16	+	R3HDM1	protein_coding	chr2	135528455	37	3.61900006	expressed	low	0	6.724444534	10.40478683	0	FALSE	2	ENSG00000121988.18;ENSG00000048991.16	ZRANB3;R3HDM1	protein_coding;protein_coding	-;+	bidirectional	0	0	1
ENSG00000049089.15	-	COL9A2	protein_coding	chr1	40314814	23	1.086727194	expressed	low	0	0.115914956	0.20726667	0	FALSE	NA	NA	NA	NA	NA	none	2.032511408	0	0
ENSG00000049130.16	-	KITLG	protein_coding	chr12	88577852	2	0.037220564	expressed	low	0	0	0.124217801	0	FALSE	2	ENSG00000049130.16;ENSG00000252850.1	KITLG;RNU1-117P	protein_coding;snRNA	-;+	bidirectional	0	1	0
ENSG00000049167.14	-	ERCC8	protein_coding	chr5	60942074	33	6.516030443	expressed	low	0	22.08361887	94.90066332	0	FALSE	2	ENSG00000049167.14;ENSG00000164182.11	ERCC8;NDUFAF2	protein_coding;protein_coding	-;+	bidirectional	0	0	1
ENSG00000049192.15	-	ADAMTS6	protein_coding	chr5	65478921	43	1.506067426	expressed	low	0	1.249053575	2.111478988	0	FALSE	NA	NA	NA	NA	NA	none	4.519867817	0	1
ENSG00000049239.12	+	H6PD	protein_coding	chr1	9231775	41	2.143912357	expressed	low	0	1.347453954	2.351419782	0	FALSE	NA	NA	NA	NA	NA	none	87.92470856	1	1
ENSG00000049245.13	+	VAMP3	protein_coding	chr1	7768296	46	18.76928144	expressed	low	0	16.73423458	21.02485785	0	FALSE	NA	NA	NA	NA	NA	none	29.10325208	0	1
ENSG00000049246.14	+	PER3	protein_coding	chr1	7781320	23	4.771760073	expressed	low	0	6.385157283	6.910294871	0	FALSE	NA	NA	NA	NA	NA	none	33.02142359	0	1
ENSG00000049247.13	-	UTS2	protein_coding	chr1	7850513	7	0.013982285	expressed	low	0	0.040454981	0.173281795	0	FALSE	NA	NA	NA	NA	NA	none	1.778576867	1	0
ENSG00000049249.8	-	TNFRSF9	protein_coding	chr1	7940166	29	0.073616905	expressed	low	0	0.050358901	0.072689975	0	FALSE	NA	NA	NA	NA	NA	none	0.12033926	1	0
ENSG00000049283.18	+	EPN3	protein_coding	chr17	50529682	5	0.031205657	expressed	low	0	0	0.124360002	0	FALSE	NA	NA	NA	NA	NA	none	0.715407553	1	0
ENSG00000049323.16	+	LTBP1	protein_coding	chr2	32943953	36	8.593751759	expressed	low	0	2.847370566	5.730344977	0	FALSE	2	ENSG00000206951.1;ENSG00000049323.16	Y_RNA;LTBP1	misc_RNA;protein_coding	-;+	bidirectional	21.21492005	0	1
ENSG00000049449.9	+	RCN1	protein_coding	chr11	32087904	25	2.824324017	expressed	low	0	4.951193429	10.31007744	0	FALSE	NA	NA	NA	NA	NA	none	14.89659134	1	0
ENSG00000049540.17	+	ELN	protein_coding	chr7	74024789	3	0	off	low	0	0	0	0	FALSE	NA	NA	NA	NA	NA	none	0.12033926	1	0
ENSG00000049541.11	-	RFC2	protein_coding	chr7	74251459	45	70.79908716	expressed	low	0	21.48799072	65.50051869	0	FALSE	NA	NA	NA	NA	NA	none	76.43489689	0	1
ENSG00000049618.23	+	ARID1B	protein_coding	chr6	156773020	38	1.826284398	expressed	low	0	1.532482942	7.505944829	0	FALSE	2	ENSG00000271265.1;ENSG00000049618.23	AL355297.3;ARID1B	lncRNA;protein_coding	-;+	bidirectional	0	0	1
ENSG00000049656.14	-	CLPTM1L	protein_coding	chr5	1342100	0	39.11075224	expressed	low	0	29.74175195	38.84177395	0	FALSE	2	ENSG00000049656.14;ENSG00000286388.1	CLPTM1L;AC026748.3	protein_coding;lncRNA	-;+	bidirectional	0.240678521	0	1
ENSG00000049759.18	+	NEDD4L	protein_coding	chr18	58041226	39	1.883502803	expressed	low	0	2.937318742	3.482080055	0	FALSE	NA	NA	NA	NA	NA	none	24.05563115	0	1
ENSG00000049768.15	-	FOXP3	protein_coding	chrX	49267478	32	0.064106888	expressed	low	0	4.827695392	6.439638798	0	FALSE	2	ENSG00000049768.15;ENSG00000286181.1	FOXP3;AC232271.3	protein_coding;lncRNA	-;-	nearby_same_strand	0	0	1
ENSG00000049769.14	+	PPP1R3F	protein_coding	chrX	49266793	31	0.295121564	expressed	low	0	3.909286385	5.527692123	0	FALSE	NA	NA	NA	NA	NA	none	0.835746813	0	1
ENSG00000049860.14	+	HEXB	protein_coding	chr5	74637023	12	25.78098972	expressed	low	0	1.45249077	2.351419782	0	FALSE	NA	NA	NA	NA	NA	none	0.842374823	1	0
ENSG00000049883.15	+	PTCD2	protein_coding	chr5	72317367	38	2.708632303	expressed	low	0	7.672173582	15.83609241	0	FALSE	NA	NA	NA	NA	NA	none	3.108936742	0	1
ENSG00000050030.15	-	NEXMIF	protein_coding	chrX	74922486	0	0	off	low	0	0	0	0	FALSE	NA	NA	NA	NA	NA	none	0.12033926	0	0
ENSG00000050130.18	+	JKAMP	protein_coding	chr14	59481443	45	9.026581727	expressed	low	0	13.60925474	18.57141747	0	FALSE	2	ENSG00000126790.12;ENSG00000050130.18	L3HYPDH;JKAMP	protein_coding;protein_coding	-;+	bidirectional	0	0	1
ENSG00000050165.18	-	DKK3	protein_coding	chr11	12006770	4	0.045258023	expressed	low	0	0	0.036344988	0	FALSE	NA	NA	NA	NA	NA	none	5.054248939	1	0
ENSG00000050327.15	+	ARHGEF5	protein_coding	chr7	144352288	0	0.088559058	expressed	low	0	0.163615752	0.266529909	0	FALSE	NA	NA	NA	NA	NA	none	0	0	0
ENSG00000050344.9	+	NFE2L3	protein_coding	chr7	26149198	34	10.69891271	expressed	low	0	4.851508742	5.806567218	0	FALSE	NA	NA	NA	NA	NA	none	31.89860219	0	1
ENSG00000050393.11	-	MCUR1	protein_coding	chr6	13811569	54	17.07045245	expressed	low	0	8.057162001	16.27633198	0	FALSE	NA	NA	NA	NA	NA	none	93.38077842	0	1
ENSG00000050405.13	-	LIMA1	protein_coding	chr12	50280547	41	7.338236246	expressed	low	0	3.862530108	5.064068278	0	FALSE	NA	NA	NA	NA	NA	none	19.16252461	0	1
ENSG00000050426.16	+	LETMD1	protein_coding	chr12	51044962	45	18.98024466	expressed	low	0	29.15869865	37.52370843	0	FALSE	NA	NA	NA	NA	NA	none	40.49115591	0	1
ENSG00000050438.17	+	SLC4A8	protein_coding	chr12	51388317	38	0.024921847	expressed	low	0	0.732298384	1.409413356	0	FALSE	NA	NA	NA	NA	NA	none	1.664865616	0	1
ENSG00000050555.18	+	LAMC3	protein_coding	chr9	131006174	20	0.012054722	expressed	low	0	0.041304623	0.145379951	0	FALSE	NA	NA	NA	NA	NA	none	0.12033926	1	0
ENSG00000050628.20	-	PTGER3	protein_coding	chr1	71044809	53	5.635305121	expressed	low	0	14.65561665	17.34805274	0	FALSE	2	ENSG00000050628.20;ENSG00000235079.1	PTGER3;ZRANB2-AS1	protein_coding;lncRNA	-;+	bidirectional	1.791832887	0	1
ENSG00000050730.16	-	TNIP3	protein_coding	chr4	121224467	1	0.018308111	expressed	low	0	0	0	0	FALSE	NA	NA	NA	NA	NA	none	0	0	0
ENSG00000050748.17	-	MAPK9	protein_coding	chr5	180289100	27	4.998039312	expressed	low	0	3.655343105	7.171231529	0	FALSE	2	ENSG00000050748.17;ENSG00000248367.1	MAPK9;AC008610.1	protein_coding;lncRNA	-;+	bidirectional	3.811088274	0	1
ENSG00000050767.17	-	COL23A1	protein_coding	chr5	178587394	10	0.032041287	expressed	low	0	0.05326785	0.143964476	0	FALSE	NA	NA	NA	NA	NA	none	3.824344294	1	0
ENSG00000050820.17	-	BCAR1	protein_coding	chr16	75265054	14	2.706136198	expressed	low	0	1.136505694	1.963921049	0	FALSE	NA	NA	NA	NA	NA	none	21.82987237	0	1
ENSG00000051009.10	-	FAM160A2	protein_coding	chr11	6231712	42	6.603782208	expressed	low	0	1.552397645	2.495384259	0	FALSE	2	ENSG00000051009.10;ENSG00000132259.13	FAM160A2;CNGA4	protein_coding;protein_coding	-;+	bidirectional	0.240678521	0	1
ENSG00000051108.15	+	HERPUD1	protein_coding	chr16	56929142	62	9.947369436	expressed	low	0	9.777796469	12.7520353	0	FALSE	NA	NA	NA	NA	NA	none	45.33890146	0	1
ENSG00000051128.19	-	HOMER3	protein_coding	chr19	18938262	9	0.799995005	expressed	low	0	1.723042967	4.200248835	0	FALSE	NA	NA	NA	NA	NA	none	0	1	0
ENSG00000051180.17	+	RAD51	protein_coding	chr15	40691774	48	14.51251594	expressed	low	0	22.55947262	36.83057785	0	FALSE	NA	NA	NA	NA	NA	none	0.829118803	0	1
ENSG00000051341.14	-	POLQ	protein_coding	chr3	121543642	29	9.199398514	expressed	low	0	1.624853064	7.966034365	0	FALSE	NA	NA	NA	NA	NA	none	16.42786167	0	1
ENSG00000051382.8	-	PIK3CB	protein_coding	chr3	138831939	63	8.113122251	expressed	low	0	2.498796247	3.887040865	0	FALSE	NA	NA	NA	NA	NA	none	68.97386274	0	1
ENSG00000051523.11	-	CYBA	protein_coding	chr16	88648055	29	60.3904745	expressed	low	0	87.18332039	125.2719753	0	FALSE	NA	NA	NA	NA	NA	none	158.6328223	0	1
ENSG00000051596.9	-	THOC3	protein_coding	chr5	176031681	0	56.61085552	expressed	low	0	0.527251094	1.180069105	0	FALSE	2	ENSG00000051596.9;ENSG00000250992.2	THOC3;AC139491.3	protein_coding;lncRNA	-;+	bidirectional	0.234050511	0	0
ENSG00000051620.11	+	HEBP2	protein_coding	chr6	138400531	36	9.566401673	expressed	low	0	54.51430063	180.3642463	0	FALSE	NA	NA	NA	NA	NA	none	53.13444135	0	1
ENSG00000051825.15	-	MPHOSPH9	protein_coding	chr12	123241015	7	17.99368701	expressed	low	0	1.201512027	2.975265847	0	FALSE	NA	NA	NA	NA	NA	none	36.50773938	0	0
ENSG00000052126.14	+	PLEKHA5	protein_coding	chr12	19126752	17	6.324711284	expressed	low	0	5.153630182	8.695246036	0	FALSE	NA	NA	NA	NA	NA	none	21.3949114	0	1
ENSG00000052344.16	-	PRSS8	protein_coding	chr16	31132728	19	1.968836848	expressed	low	0	3.83712351	6.707761228	0	FALSE	NA	NA	NA	NA	NA	none	9.166702904	0	0
ENSG00000052723.11	-	SIKE1	protein_coding	chr1	114777686	44	19.70000904	expressed	low	0	22.05885929	37.71869284	0	FALSE	NA	NA	NA	NA	NA	none	23.68135735	0	1
ENSG00000052749.13	-	RRP12	protein_coding	chr10	97423077	36	14.73832084	expressed	low	0	49.36981775	96.63348128	0	FALSE	2	ENSG00000052749.13;ENSG00000171314.9	RRP12;PGAM1	protein_coding;protein_coding	-;+	bidirectional	0	0	1
ENSG00000052795.13	+	FNIP2	protein_coding	chr4	158766026	29	3.371792024	expressed	low	0	1.604623988	3.935029024	0	FALSE	NA	NA	NA	NA	NA	none	23.02560189	0	1
ENSG00000052802.13	+	MSMO1	protein_coding	chr4	165324667	51	28.54005476	expressed	low	0	9.400519131	20.16565091	0	FALSE	NA	NA	NA	NA	NA	none	25.04589235	0	1
ENSG00000052841.15	+	TTC17	protein_coding	chr11	43355920	34	14.2068788	expressed	low	0	7.398988727	18.01158107	0	FALSE	NA	NA	NA	NA	NA	none	0.354389771	0	1
ENSG00000052850.8	-	ALX4	protein_coding	chr11	44307140	12	0.601987873	expressed	low	0	0.378492638	0.484254505	0	FALSE	NA	NA	NA	NA	NA	none	3.349615262	1	0
ENSG00000053108.17	-	FSTL4	protein_coding	chr5	133609542	7	0.014926105	expressed	low	0	0	0	0	FALSE	NA	NA	NA	NA	NA	none	1.203392604	1	0
ENSG00000053254.15	-	FOXN3	protein_coding	chr14	89616150	0	0.144638298	expressed	low	0	0	0.191952635	0	FALSE	NA	NA	NA	NA	NA	none	0.722035563	1	0
ENSG00000053328.8	-	METTL24	protein_coding	chr6	110355273	1	0.024574315	expressed	low	0	0	0.057760598	0	FALSE	NA	NA	NA	NA	NA	none	0.240678521	1	0
ENSG00000053371.12	-	AKR7A2	protein_coding	chr1	19309147	53	46.1013245	expressed	low	0	14.85444045	19.7468226	0	FALSE	2	ENSG00000053371.12;ENSG00000040487.13	AKR7A2;SLC66A1	protein_coding;protein_coding	-;+	bidirectional	0.12033926	0	1
ENSG00000053372.5	+	MRTO4	protein_coding	chr1	19248805	42	100.2808404	expressed	low	0	33.19878013	57.24705424	0	FALSE	2	ENSG00000127463.15;ENSG00000053372.5	EMC1;MRTO4	protein_coding;protein_coding	-;+	bidirectional	0.835746813	0	1
ENSG00000053438.11	+	NNAT	protein_coding	chr20	37518206	3	0.99103422	expressed	low	0	25.33986761	34.50350827	0	FALSE	NA	NA	NA	NA	NA	none	20.24454288	0	0
ENSG00000053501.13	+	USE1	protein_coding	chr19	17212346	48	5.393437724	expressed	low	0	22.90273683	43.53833908	0	FALSE	NA	NA	NA	NA	NA	none	81.50136676	0	1
ENSG00000053524.12	-	MCF2L2	protein_coding	chr3	183425779	32	0.572369288	expressed	low	0	1.266761676	2.4473961	0	FALSE	NA	NA	NA	NA	NA	none	25.47319023	0	1
ENSG00000053702.15	-	NRIP2	protein_coding	chr12	2832545	5	0.581430106	expressed	low	0	1.460944769	2.475078582	0	FALSE	NA	NA	NA	NA	NA	none	45.7396873	0	0
ENSG00000053747.16	+	LAMA3	protein_coding	chr18	23686443	0	0.001706109	expressed	low	0	0	0.0621089	0	FALSE	NA	NA	NA	NA	NA	none	0.601696302	1	0
ENSG00000053770.12	+	AP5M1	protein_coding	chr14	57265924	50	5.006353333	expressed	low	0	10.50856345	17.94929362	0	FALSE	2	ENSG00000070367.16;ENSG00000053770.12	EXOC5;AP5M1	protein_coding;protein_coding	-;+	bidirectional	0	0	1
ENSG00000053900.10	+	ANAPC4	protein_coding	chr4	25374213	31	11.13778615	expressed	low	0	3.874772897	11.48257352	0	FALSE	NA	NA	NA	NA	NA	none	82.23106542	0	1
ENSG00000053918.17	+	KCNQ1	protein_coding	chr11	2441684	1	0	off	low	0	0	0.012114996	0	FALSE	NA	NA	NA	NA	NA	none	0.12033926	1	0
ENSG00000054116.12	-	TRAPPC3	protein_coding	chr1	36153054	42	37.38524643	expressed	low	0	3.383221102	11.4068839	0	TRUE	NA	NA	NA	NA	NA	none	0.835746813	0	1
ENSG00000054118.15	+	THRAP3	protein_coding	chr1	36221432	62	71.02887882	expressed	low	0	10.04834982	18.85934642	0	FALSE	NA	NA	NA	NA	NA	none	40.53092397	0	1
ENSG00000054148.17	+	PHPT1	protein_coding	chr9	136845724	50	41.05921451	expressed	low	0	68.09406521	203.6550839	0	FALSE	NA	NA	NA	NA	NA	none	18.74848275	0	1
ENSG00000054179.12	-	ENTPD2	protein_coding	chr9	137051062	2	0.027228017	expressed	low	0	0.077340283	0.378802282	0	FALSE	NA	NA	NA	NA	NA	none	0	0	0
ENSG00000054219.11	-	LY75	protein_coding	chr2	159901757	2	0	off	low	0	0.024323654	0.0621089	0	FALSE	2	ENSG00000248672.5;ENSG00000054219.11	LY75-CD302;LY75	protein_coding;protein_coding	-;-	nearby_same_strand	0	1	0
ENSG00000054267.22	-	ARID4B	protein_coding	chr1	235325220	70	10.6360172	expressed	low	0	31.8528287	48.80395753	0	FALSE	2	ENSG00000054267.22;ENSG00000285053.1	ARID4B;TBCE	protein_coding;protein_coding	-;+	bidirectional	0	0	1
ENSG00000054277.14	-	OPN3	protein_coding	chr1	241674377	2	2.651678808	expressed	low	0	0.083017133	0.143964476	0	FALSE	NA	NA	NA	NA	NA	none	0.481357042	0	0
ENSG00000054282.16	+	SDCCAG8	protein_coding	chr1	243253034	0	9.41594527	expressed	low	0	13.15847662	29.608694	0	FALSE	2	ENSG00000143702.16;ENSG00000054282.16	CEP170;SDCCAG8	protein_coding;protein_coding	-;+	bidirectional	1.190136584	0	1
ENSG00000054356.14	-	PTPRN	protein_coding	chr2	219306649	15	0.091477869	expressed	low	0	0.050358901	0.302874897	0	FALSE	NA	NA	NA	NA	NA	none	2.76780299	1	0
ENSG00000054392.13	+	HHAT	protein_coding	chr1	210325252	0	0.059182857	expressed	low	0	0	0.052729644	0	FALSE	NA	NA	NA	NA	NA	none	0	1	0
ENSG00000054523.17	+	KIF1B	protein_coding	chr1	10207805	41	4.548868849	expressed	low	0	1.349597239	2.900130398	0	FALSE	NA	NA	NA	NA	NA	none	28.63515106	1	1
ENSG00000054598.9	+	FOXC1	protein_coding	chr6	1606915	4	0	off	low	0	0	0	0	FALSE	NA	NA	NA	NA	NA	none	5.769656491	1	0
ENSG00000054611.14	+	TBC1D22A	protein_coding	chr22	46759617	39	4.624071802	expressed	low	0	9.841438098	15.21337358	0	FALSE	2	ENSG00000260708.1;ENSG00000054611.14	AL118516.1;TBC1D22A	lncRNA;protein_coding	-;+	bidirectional	0.234050511	0	1
ENSG00000054654.16	+	SYNE2	protein_coding	chr14	63849983	2	0.161134753	expressed	low	0	0.019239909	0.143964476	0	FALSE	NA	NA	NA	NA	NA	none	0.722035563	1	0
ENSG00000054690.14	+	PLEKHH1	protein_coding	chr14	67530290	17	0.608353855	expressed	low	0	0.393048591	0.959763177	0	FALSE	NA	NA	NA	NA	NA	none	0	0	1
ENSG00000054793.14	-	ATP9A	protein_coding	chr20	51765391	1	0.293893218	expressed	low	0	0	0.026364822	0	FALSE	NA	NA	NA	NA	NA	none	0.601696302	1	0
ENSG00000054796.13	+	SPO11	protein_coding	chr20	57326803	11	0.011956894	expressed	low	0	0.044720746	0.248435601	0	FALSE	NA	NA	NA	NA	NA	none	2.373645159	1	0
ENSG00000054803.4	-	CBLN4	protein_coding	chr20	56002520	0	0	off	low	0	0	0	0	FALSE	NA	NA	NA	NA	NA	none	3.128820772	0	0
ENSG00000054938.15	-	CHRDL2	protein_coding	chr11	74728386	1	0.007987966	expressed	low	0	0	0.047988159	0	FALSE	NA	NA	NA	NA	NA	none	0	1	0
ENSG00000054965.10	-	FAM168A	protein_coding	chr11	73595190	37	2.799433284	expressed	low	0	1.229749438	1.845537526	0	FALSE	NA	NA	NA	NA	NA	none	9.707712036	0	1
ENSG00000054967.13	+	RELT	protein_coding	chr11	73373399	38	4.375478689	expressed	low	0	4.266358149	8.497933468	0	FALSE	NA	NA	NA	NA	NA	none	69.23794806	0	1
ENSG00000054983.17	-	GALC	protein_coding	chr14	87990666	46	4.782237117	expressed	low	0	1.512193482	1.871538194	0	FALSE	NA	NA	NA	NA	NA	none	11.46640487	0	1
ENSG00000055044.11	+	NOP58	protein_coding	chr2	202262736	50	60.29684834	expressed	low	0	20.75726671	38.52631919	0	FALSE	NA	NA	NA	NA	NA	none	41.36667079	0	1
ENSG00000055070.17	+	SZRD1	protein_coding	chr1	16349575	56	12.85659122	expressed	low	0	4.434857613	8.109998842	0	FALSE	2	ENSG00000037637.11;ENSG00000055070.17	FBXO42;SZRD1	protein_coding;protein_coding	-;+	bidirectional	0	0	1
ENSG00000055118.15	-	KCNH2	protein_coding	chr7	150975322	43	86.6822884	expressed	low	0	1.647208483	5.193869894	0	TRUE	NA	NA	NA	NA	NA	none	44.7637172	1	1
ENSG00000055130.17	+	CUL1	protein_coding	chr7	148694914	49	47.6313335	expressed	low	0	11.69596317	15.91808025	0	FALSE	NA	NA	NA	NA	NA	none	1.076425334	0	1
ENSG00000055147.19	-	FAM114A2	protein_coding	chr5	154035937	45	9.061478366	expressed	low	0	4.576693053	11.46916996	0	FALSE	NA	NA	NA	NA	NA	none	0	0	1
ENSG00000055163.20	+	CYFIP2	protein_coding	chr5	157263079	6	0.897125423	expressed	low	0	0.559459711	0.807415703	0	FALSE	NA	NA	NA	NA	NA	none	0	1	0
ENSG00000055208.19	+	TAB2	protein_coding	chr6	149215641	1	6.787155122	expressed	low	0	0.0910603	0.191952635	0	FALSE	2	ENSG00000228408.6;ENSG00000055208.19	AL031056.1;TAB2	lncRNA;protein_coding	+;+	nearby_same_strand	0	0	0
ENSG00000055211.14	+	GINM1	protein_coding	chr6	149563294	39	12.26572932	expressed	low	0	3.064278317	6.383813435	0	FALSE	NA	NA	NA	NA	NA	none	23.03989299	0	1
ENSG00000055332.18	-	EIF2AK2	protein_coding	chr2	37154066	9	4.965832339	expressed	low	0	1.23503892	2.653013375	0	FALSE	NA	NA	NA	NA	NA	none	16.11986797	0	1
ENSG00000055483.19	-	USP36	protein_coding	chr17	78838442	54	3.84234974	expressed	low	0	3.640356491	6.080084342	0	FALSE	NA	NA	NA	NA	NA	none	72.99041932	0	1
ENSG00000055609.18	-	KMT2C	protein_coding	chr7	152433006	64	10.90880738	expressed	low	0	4.573064687	17.85159508	0	TRUE	NA	NA	NA	NA	NA	none	120.873224	0	1
ENSG00000055732.13	-	MCOLN3	protein_coding	chr1	85045501	4	0	off	low	0	0	0.041453334	0	FALSE	NA	NA	NA	NA	NA	none	0.12033926	1	0
ENSG00000055813.6	+	CCDC85A	protein_coding	chr2	56180990	5	0.041032134	expressed	low	0	0.55190146	1.151715812	0	FALSE	NA	NA	NA	NA	NA	none	1.417559085	1	0
ENSG00000055917.15	-	PUM2	protein_coding	chr2	20349235	44	13.56214311	expressed	low	0	3.654915134	6.259453433	0	FALSE	NA	NA	NA	NA	NA	none	41.98058803	0	1
ENSG00000055950.16	-	MRPL43	protein_coding	chr10	100984516	21	7.760239982	expressed	low	0	43.56389631	61.57279799	0	FALSE	NA	NA	NA	NA	NA	none	0.234050511	0	1
ENSG00000055955.17	-	ITIH4	protein_coding	chr3	52827689	4	0	off	low	0	0.401957534	1.180069105	0	FALSE	NA	NA	NA	NA	NA	none	3.837600314	1	0
ENSG00000055957.11	+	ITIH1	protein_coding	chr3	52774595	0	0.004800136	expressed	low	0	0.005570622	0.0621089	0	FALSE	NA	NA	NA	NA	NA	none	0.722035563	1	0
ENSG00000056050.7	-	HPF1	protein_coding	chr4	169754945	35	23.47987104	expressed	low	0	1.861307513	3.689346725	0	FALSE	NA	NA	NA	NA	NA	none	12.910476	0	1
ENSG00000056097.16	-	ZFR	protein_coding	chr5	32441741	34	32.73500738	expressed	low	0	5.894135654	13.34070815	0	FALSE	NA	NA	NA	NA	NA	none	41.84699275	0	1
ENSG00000056277.16	-	ZNF280C	protein_coding	chrX	130265900	42	2.416486741	expressed	low	0	1.586608164	2.404293372	0	FALSE	NA	NA	NA	NA	NA	none	16.03929677	0	1
ENSG00000056291.17	+	NPFFR2	protein_coding	chr4	72028804	1	0.223526684	expressed	low	0	0	0.047988159	0	FALSE	NA	NA	NA	NA	NA	none	0	1	0
ENSG00000056487.16	-	PHF21B	protein_coding	chr22	45007006	2	0.003628669	expressed	low	0	0	0	0	FALSE	NA	NA	NA	NA	NA	none	1.076425334	1	0
ENSG00000056558.11	-	TRAF1	protein_coding	chr9	120926174	8	0.047453315	expressed	low	0	0.016711865	0.231042394	0	FALSE	NA	NA	NA	NA	NA	none	1.203392604	0	0
ENSG00000056586.16	-	RC3H2	protein_coding	chr9	122902360	36	8.827949672	expressed	low	0	3.112969003	7.088520113	0	FALSE	NA	NA	NA	NA	NA	none	67.02751546	0	1
ENSG00000056736.10	+	IL17RB	protein_coding	chr3	53843568	3	1.474006485	expressed	low	0	0.439056107	0.869017	0	FALSE	2	ENSG00000016391.11;ENSG00000056736.10	CHDH;IL17RB	protein_coding;protein_coding	-;+	bidirectional	0	1	0
ENSG00000056972.20	-	TRAF3IP2	protein_coding	chr6	111603907	48	1.983188903	expressed	low	0	1.664272412	2.207455306	0	FALSE	NA	NA	NA	NA	NA	none	8.705229893	0	1
ENSG00000056998.20	+	GYG2	protein_coding	chrX	2825822	6	2.484408737	expressed	low	0	0.573195786	1.129927179	0	FALSE	NA	NA	NA	NA	NA	none	2.273189928	0	0
ENSG00000057019.16	-	DCBLD2	protein_coding	chr3	98898696	24	3.835842775	expressed	low	0	3.4280445	6.046508012	0	FALSE	2	ENSG00000057019.16;ENSG00000239462.1	DCBLD2;AC091212.1	protein_coding;lncRNA	-;+	bidirectional	0.354389771	0	1
ENSG00000057149.16	-	SERPINB3	protein_coding	chr18	63658894	0	0	off	low	0	0	0.173281795	0	FALSE	NA	NA	NA	NA	NA	none	0.12033926	0	0
ENSG00000057252.13	+	SOAT1	protein_coding	chr1	179290714	30	12.04781822	expressed	low	0	2.55960379	5.518638265	0	FALSE	NA	NA	NA	NA	NA	none	16.41460565	0	1
ENSG00000057294.14	-	PKP2	protein_coding	chr12	32893841	11	1.017200681	expressed	low	0	0.678223225	1.285053354	0	FALSE	NA	NA	NA	NA	NA	none	8.00970637	0	1
ENSG00000057468.7	+	MSH4	protein_coding	chr1	75793882	27	0.176570029	expressed	low	0	49.53573254	86.66661484	0	FALSE	NA	NA	NA	NA	NA	none	377.6249993	0	0
ENSG00000057593.13	+	F7	protein_coding	chr13	113102788	3	0	off	low	0	0	0	0	FALSE	NA	NA	NA	NA	NA	none	0.354389771	1	0
ENSG00000057608.17	-	GDI2	protein_coding	chr10	5839133	18	188.374443	expressed	low	0	0	0.047988159	0	FALSE	NA	NA	NA	NA	NA	none	0.234050511	0	0
ENSG00000057657.17	+	PRDM1	protein_coding	chr6	105990463	27	0.310341727	expressed	low	0	0.018753033	0.124360002	0	FALSE	NA	NA	NA	NA	NA	none	0.842374823	0	1
ENSG00000057663.16	-	ATG5	protein_coding	chr6	106322792	56	26.12907205	expressed	low	0	11.29704687	20.15844887	0	FALSE	NA	NA	NA	NA	NA	none	20.5657926	0	1
ENSG00000057704.13	-	TMCC3	protein_coding	chr12	94647558	0	0.003347269	expressed	low	0	0	0.0621089	0	FALSE	NA	NA	NA	NA	NA	none	0.601696302	1	0
ENSG00000057757.10	+	PITHD1	protein_coding	chr1	23775418	77	82.51328419	expressed	low	0	37.92158606	50.2414408	0	TRUE	2	ENSG00000236810.6;ENSG00000057757.10	ELOA-AS1;PITHD1	lncRNA;protein_coding	-;+	bidirectional	1.671493626	0	1
ENSG00000057935.13	+	MTA3	protein_coding	chr2	42491569	5	2.434428805	expressed	low	0	0.078541585	0.191952635	0	FALSE	2	ENSG00000171126.8;ENSG00000057935.13	KCNG3;MTA3	protein_coding;protein_coding	-;+	bidirectional	0.468101022	1	0
ENSG00000058056.9	+	USP13	protein_coding	chr3	179650040	20	0.21092448	expressed	low	0	0.153447446	0.423367257	0	FALSE	NA	NA	NA	NA	NA	none	4.078278835	1	0
ENSG00000058063.16	+	ATP11B	protein_coding	chr3	182790503	35	28.76078128	expressed	low	0	4.317462811	12.2369805	0	FALSE	2	ENSG00000240063.1;ENSG00000058063.16	AC069431.1;ATP11B	lncRNA;protein_coding	-;+	bidirectional	0	0	1
ENSG00000058085.15	+	LAMC2	protein_coding	chr1	183183238	0	0.003219707	expressed	low	0	0	0	0	FALSE	NA	NA	NA	NA	NA	none	0.361017781	1	0
ENSG00000058091.17	+	CDK14	protein_coding	chr7	90463424	1	0.125903436	expressed	low	0	0.02556651	0.143964476	0	FALSE	NA	NA	NA	NA	NA	none	0.12033926	0	0
ENSG00000058262.10	+	SEC61A1	protein_coding	chr3	128048641	25	49.97446812	expressed	low	0	13.18974403	22.17052938	0	FALSE	NA	NA	NA	NA	NA	none	0.361017781	0	1
ENSG00000058272.19	-	PPP1R12A	protein_coding	chr12	79932461	47	20.05661641	expressed	low	0	17.95114653	29.51271768	0	FALSE	NA	NA	NA	NA	NA	none	0.361017781	0	1
ENSG00000058335.15	-	RASGRF1	protein_coding	chr15	79087774	1	0.00910812	expressed	low	0	0	0.0621089	0	FALSE	NA	NA	NA	NA	NA	none	2.76117498	1	0
ENSG00000058404.20	-	CAMK2B	protein_coding	chr7	44331578	2	0.029102011	expressed	low	0	0.006057498	0.041453334	0	FALSE	NA	NA	NA	NA	NA	none	0.722035563	1	0
ENSG00000058453.17	+	CROCC	protein_coding	chr1	16737273	0	2.443954406	expressed	low	0	7.528493804	2725.535469	0	FALSE	3	ENSG00000058453.17;ENSG00000227684.2;ENSG00000207389.1	CROCC;CROCCP4;RNU1-4	protein_coding;transcribed_unprocessed_pseudogene;snRNA	+;+;+	multiple_nearby_promoters	264.1465293	0	0
ENSG00000058600.16	+	POLR3E	protein_coding	chr16	22294375	10	18.75270156	expressed	low	0	6.672740056	14.21849356	0	FALSE	NA	NA	NA	NA	NA	none	59.68122764	0	1
ENSG00000058668.14	+	ATP2B4	protein_coding	chr1	203623561	59	10.03354723	expressed	low	0	3.732528537	4.8947922	0	FALSE	NA	NA	NA	NA	NA	none	7.99645035	0	1
ENSG00000058673.16	+	ZC3H11A	protein_coding	chr1	203792654	57	0.359179513	expressed	low	0	43.36782649	73.85377643	0	FALSE	2	ENSG00000058673.16;ENSG00000257315.2	ZC3H11A;ZBED6	protein_coding;protein_coding	+;+	nearby_same_strand	0.12033926	0	1
ENSG00000058729.11	-	RIOK2	protein_coding	chr5	97180248	47	12.80216866	expressed	low	0	4.796976764	10.6053831	0	FALSE	2	ENSG00000058729.11;ENSG00000286828.1	RIOK2;AC008883.3	protein_coding;lncRNA	-;+	bidirectional	0.481357042	0	1
ENSG00000058799.15	-	YIPF1	protein_coding	chr1	53886799	35	16.66599904	expressed	low	0	6.511590991	8.00049346	0	FALSE	2	ENSG00000058799.15;ENSG00000211452.10	YIPF1;DIO1	protein_coding;protein_coding	-;+	bidirectional	2.367017149	0	1
ENSG00000058804.12	-	NDC1	protein_coding	chr1	53835464	48	54.56807271	expressed	low	0	10.33036572	14.34285356	0	FALSE	NA	NA	NA	NA	NA	none	33.82403036	0	1
ENSG00000058866.15	-	DGKG	protein_coding	chr3	186359235	0	0.042974193	expressed	low	0	0	0	0	FALSE	NA	NA	NA	NA	NA	none	0.481357042	1	0
ENSG00000059122.16	+	FLYWCH1	protein_coding	chr16	2908937	32	5.044851004	expressed	low	0	2.579510181	5.374673788	0	FALSE	NA	NA	NA	NA	NA	none	27.50570164	0	1
ENSG00000059145.18	-	UNKL	protein_coding	chr16	1411752	17	4.271435151	expressed	low	0	2.004306707	2.528653374	0	FALSE	NA	NA	NA	NA	NA	none	37.43420817	0	1
ENSG00000059377.17	+	TBXAS1	protein_coding	chr7	139774051	28	2.131032209	expressed	low	0	3.645783773	5.566626424	0	FALSE	NA	NA	NA	NA	NA	none	0.481357042	1	1
ENSG00000059378.12	-	PARP12	protein_coding	chr7	140060722	55	8.237587851	expressed	low	0	3.42044108	5.306026751	0	FALSE	NA	NA	NA	NA	NA	none	24.76441069	0	1
ENSG00000059573.9	-	ALDH18A1	protein_coding	chr10	95653712	20	34.20829859	expressed	low	0	4.828170733	7.135732573	0	FALSE	NA	NA	NA	NA	NA	none	11.23898237	0	1
ENSG00000059588.10	-	TARBP1	protein_coding	chr1	234476180	28	8.599457165	expressed	low	0	3.537994014	5.299896528	0	FALSE	NA	NA	NA	NA	NA	none	74.17185774	0	1
ENSG00000059691.12	-	GATB	protein_coding	chr4	151758008	28	2.867330469	expressed	low	0	6.072620422	9.643536721	0	FALSE	NA	NA	NA	NA	NA	none	7.521721318	0	1
ENSG00000059728.11	+	MXD1	protein_coding	chr2	69894688	7	7.124045496	expressed	low	0	21.3709672	82.48213465	0	FALSE	NA	NA	NA	NA	NA	none	5.596293151	0	1
ENSG00000059758.8	-	CDK17	protein_coding	chr12	96397481	57	12.20324558	expressed	low	0	3.438048089	12.86082657	0	FALSE	NA	NA	NA	NA	NA	none	53.19202328	0	1
ENSG00000059769.20	+	DNAJC25	protein_coding	chr9	111628334	38	4.320408512	expressed	low	0	6.285082031	9.134706894	0	FALSE	3	ENSG00000204173.11;ENSG00000059769.20;ENSG00000244115.1	LRRC37A5P;DNAJC25;DNAJC25-GNG10	transcribed_unprocessed_pseudogene;protein_coding;protein_coding	-;+;+	multiple_nearby_promoters	0	0	1
ENSG00000059804.16	-	SLC2A3	protein_coding	chr12	7933188	30	56.59938641	expressed	low	0	45.70188195	101.0148356	0	FALSE	NA	NA	NA	NA	NA	none	16.9831619	0	1
ENSG00000059915.17	-	PSD	protein_coding	chr10	102418540	45	0.418849477	expressed	low	0	39.83428209	45.96058619	0	FALSE	NA	NA	NA	NA	NA	none	32.75630319	0	1
ENSG00000060069.16	+	CTDP1	protein_coding	chr18	79676801	0	4.042691731	expressed	low	0	6.857018564	8.493904112	0	FALSE	3	ENSG00000178412.4;ENSG00000274828.1;ENSG00000060069.16	AC068473.1;AC068473.5;CTDP1	lncRNA;lncRNA;protein_coding	-;-;+	multiple_nearby_promoters	0	0	1
ENSG00000060138.13	-	YBX3	protein_coding	chr12	10720324	26	8.565920058	expressed	low	0	12.76191212	43.87883877	0	FALSE	NA	NA	NA	NA	NA	none	26.4226483	0	1
ENSG00000060140.9	-	STYK1	protein_coding	chr12	10671319	17	0.355230636	expressed	low	0	0.082609246	0.239940794	0	FALSE	NA	NA	NA	NA	NA	none	1.303847835	0	1
ENSG00000060237.17	+	WNK1	protein_coding	chr12	749579	53	5.77805861	expressed	low	0	15.08070775	33.66787744	0	FALSE	NA	NA	NA	NA	NA	none	62.13233876	0	1
ENSG00000060339.14	+	CCAR1	protein_coding	chr10	68718012	55	36.23459059	expressed	low	0	15.47440885	21.54668331	0	FALSE	NA	NA	NA	NA	NA	none	55.38671217	0	1
ENSG00000060491.16	+	OGFR	protein_coding	chr20	62801835	15	16.12235221	expressed	low	0	11.55466845	12.85053354	0	FALSE	NA	NA	NA	NA	NA	none	7.762399839	0	1
ENSG00000060558.4	+	GNA15	protein_coding	chr19	3133033	18	0.214443668	expressed	low	0	0.150037475	0.376642393	0	FALSE	NA	NA	NA	NA	NA	none	1.444071125	0	1
ENSG00000060566.14	+	CREB3L3	protein_coding	chr19	4150631	16	0	off	low	1	0.06230403	0.186326701	0	FALSE	NA	NA	NA	NA	NA	none	0.708779543	1	0
ENSG00000060642.10	+	PIGV	protein_coding	chr1	26784472	60	10.05805449	expressed	low	0	4.963513804	11.22922917	0	TRUE	NA	NA	NA	NA	NA	none	161.5331854	0	1
ENSG00000060656.20	+	PTPRU	protein_coding	chr1	29233516	18	0.85478787	expressed	low	0	0.069834722	0.20726667	0	FALSE	NA	NA	NA	NA	NA	none	0.722035563	1	0
ENSG00000060688.13	-	SNRNP40	protein_coding	chr1	31293789	30	74.37017807	expressed	low	0	25.17411828	47.33970742	0	FALSE	2	ENSG00000060688.13;ENSG00000121766.15	SNRNP40;ZCCHC17	protein_coding;protein_coding	-;+	bidirectional	1.912172147	0	1
ENSG00000060709.15	-	RIMBP2	protein_coding	chr12	130713282	0	0.00451526	expressed	low	0	0	0.012114996	0	FALSE	NA	NA	NA	NA	NA	none	0.601696302	1	0
ENSG00000060718.22	-	COL11A1	protein_coding	chr1	103105873	0	0.002397692	expressed	low	0	0	0	0	FALSE	NA	NA	NA	NA	NA	none	0.601696302	0	0
ENSG00000060749.15	+	QSER1	protein_coding	chr11	32889820	64	7.124038856	expressed	low	0	3.717663417	7.438164618	0	FALSE	NA	NA	NA	NA	NA	none	90.6736626	0	1
ENSG00000060762.19	-	MPC1	protein_coding	chr6	166380014	50	68.69041857	expressed	low	0	16.31096633	32.87249386	0	FALSE	2	ENSG00000060762.19;ENSG00000261420.1	MPC1;AL022069.1	protein_coding;lncRNA	-;+	bidirectional	0.240678521	0	1
ENSG00000060971.18	-	ACAA1	protein_coding	chr3	38134243	37	4.116544667	expressed	low	0	20.77558982	97.03780547	0	FALSE	2	ENSG00000060971.18;ENSG00000172936.14	ACAA1;MYD88	protein_coding;protein_coding	-;+	bidirectional	2.493984419	0	1
ENSG00000060982.15	-	BCAT1	protein_coding	chr12	24946102	76	57.87323836	expressed	low	0	15.82700988	40.02212446	0	TRUE	2	ENSG00000060982.15;ENSG00000255921.1	BCAT1;AC026310.2	protein_coding;lncRNA	-;+	bidirectional	0.481357042	0	1
ENSG00000061273.18	-	HDAC7	protein_coding	chr12	47830133	33	12.28478741	expressed	low	0	0.709394805	1.741040028	0	FALSE	NA	NA	NA	NA	NA	none	11.15944625	0	1
ENSG00000061337.15	-	LZTS1	protein_coding	chr8	20300964	5	0.008208849	expressed	low	0	0	0.115521197	0	FALSE	NA	NA	NA	NA	NA	none	1.444071125	1	0
ENSG00000061455.11	+	PRDM6	protein_coding	chr5	123086241	0	0.007787862	expressed	low	0	0.032841663	0.057760598	0	FALSE	NA	NA	NA	NA	NA	none	0.12033926	1	0
ENSG00000061492.12	+	WNT8A	protein_coding	chr5	138080990	2	0	off	low	0	0.047091489	0.0621089	0	FALSE	NA	NA	NA	NA	NA	none	0.12033926	1	0
ENSG00000061656.10	+	SPAG4	protein_coding	chr20	35612829	44	2.833325294	expressed	low	0	4.030378974	5.481491849	0	FALSE	NA	NA	NA	NA	NA	none	43.93356331	0	1
ENSG00000061676.15	-	NCKAP1	protein_coding	chr2	183035859	50	13.05559367	expressed	low	0	10.37948503	17.03732027	0	FALSE	NA	NA	NA	NA	NA	none	107.6170564	0	1
ENSG00000061794.13	+	MRPS35	protein_coding	chr12	27707822	36	92.24278361	expressed	low	0	11.85262923	27.27629377	0	FALSE	2	ENSG00000256377.6;ENSG00000061794.13	AC009509.1;MRPS35	lncRNA;protein_coding	-;+	bidirectional	0	0	1
ENSG00000061918.13	+	GUCY1B1	protein_coding	chr4	155755992	0	0.006409591	expressed	low	0	0	0.047988159	0	FALSE	NA	NA	NA	NA	NA	none	1.083053344	0	0
ENSG00000061936.9	+	SFSWAP	protein_coding	chr12	131708081	34	9.187444536	expressed	low	0	16.0777921	23.2967737	0	FALSE	NA	NA	NA	NA	NA	none	45.58517291	0	1
ENSG00000061938.19	-	TNK2	protein_coding	chr3	195908946	9	1.988735282	expressed	low	0	0.435117805	1.237539291	0	FALSE	NA	NA	NA	NA	NA	none	2.132966638	0	1
ENSG00000061987.16	+	MON2	protein_coding	chr12	62463817	23	5.219275469	expressed	low	0	3.449385985	7.77408173	0	FALSE	NA	NA	NA	NA	NA	none	23.90877985	0	1
ENSG00000062038.14	+	CDH3	protein_coding	chr16	68633189	4	0.003587462	expressed	low	0	0.019509012	0.057760598	0	FALSE	NA	NA	NA	NA	NA	none	0.715407553	1	0
ENSG00000062096.15	+	ARSF	protein_coding	chrX	3038471	0	0	off	low	0	0.146621139	0.287928953	0	FALSE	NA	NA	NA	NA	NA	none	0.240678521	0	0
ENSG00000062194.16	+	GPBP1	protein_coding	chr5	57170948	42	32.94433831	expressed	low	0	32.86273133	56.24212214	0	FALSE	NA	NA	NA	NA	NA	none	19.24868874	0	1
ENSG00000062282.15	+	DGAT2	protein_coding	chr11	75756512	3	0.592901993	expressed	low	0	0	0.047988159	0	FALSE	NA	NA	NA	NA	NA	none	0.361017781	0	0
ENSG00000062370.16	-	ZNF112	protein_coding	chr19	44364218	8	1.474318013	expressed	low	0	0.042166573	0.124217801	0	FALSE	NA	NA	NA	NA	NA	none	0.361017781	0	0
ENSG00000062485.19	-	CS	protein_coding	chr12	56297392	64	27.04964228	expressed	low	0	17.06310658	38.78265286	0	FALSE	NA	NA	NA	NA	NA	none	1.544526356	0	1
ENSG00000062524.16	-	LTK	protein_coding	chr15	41510888	21	3.271954976	expressed	low	0	3.086424763	5.088410607	0	FALSE	NA	NA	NA	NA	NA	none	22.94047284	0	1
ENSG00000062582.14	-	MRPS24	protein_coding	chr7	43866894	32	1.481836284	expressed	low	0	45.04765113	52.4384675	0	FALSE	NA	NA	NA	NA	NA	none	43.35734397	0	1
ENSG00000062598.18	-	ELMO2	protein_coding	chr20	46429986	0	3.163790823	expressed	low	0	0	0.033423731	0	FALSE	NA	NA	NA	NA	NA	none	0.12033926	1	0
ENSG00000062650.19	-	WAPL	protein_coding	chr10	86518793	30	23.43519713	expressed	low	0	6.87143393	11.61313444	0	FALSE	2	ENSG00000062650.19;ENSG00000227896.2	WAPL;AL731569.1	protein_coding;lncRNA	-;+	bidirectional	0	0	1
ENSG00000062716.13	+	VMP1	protein_coding	chr17	59704192	45	64.4748776	expressed	low	0	24.49975782	50.54052368	0	TRUE	NA	NA	NA	NA	NA	none	0.842374823	0	1
ENSG00000062725.10	-	APPBP2	protein_coding	chr17	60523243	41	5.974297728	expressed	low	0	4.24947305	10.07316016	0	FALSE	2	ENSG00000062725.10;ENSG00000259349.2	APPBP2;AC011921.1	protein_coding;lncRNA	-;+	bidirectional	0	0	1
ENSG00000062822.14	+	POLD1	protein_coding	chr19	50381204	36	55.53208182	expressed	low	0	27.98055693	34.07464054	0	FALSE	NA	NA	NA	NA	NA	none	187.3827196	0	1
ENSG00000063015.20	-	SEZ6	protein_coding	chr17	29003441	6	0.129070529	expressed	low	0	0	0	0	FALSE	NA	NA	NA	NA	NA	none	0.842374823	1	0
ENSG00000063046.17	+	EIF4B	protein_coding	chr12	53003158	60	262.1088801	expressed	low	0	33.8283962	60.8534943	0	FALSE	NA	NA	NA	NA	NA	none	48.68085363	0	1
ENSG00000063127.16	-	SLC6A16	protein_coding	chr19	49322216	2	0.242797872	expressed	low	0	0.271407846	0.83399387	0	FALSE	NA	NA	NA	NA	NA	none	2.393529189	0	0
ENSG00000063169.10	+	BICRA	protein_coding	chr19	47605196	37	0.136836065	expressed	low	0	0.952056872	1.727573718	0	FALSE	2	ENSG00000268746.1;ENSG00000063169.10	AC010519.1;BICRA	lncRNA;protein_coding	+;+	nearby_same_strand	0	0	1
ENSG00000063176.16	+	SPHK2	protein_coding	chr19	48616291	57	1.769294927	expressed	low	0	426.7031695	635.8526901	0	FALSE	2	ENSG00000063177.13;ENSG00000063176.16	RPL18;SPHK2	protein_coding;protein_coding	-;+	bidirectional	0	0	1
ENSG00000063177.13	-	RPL18	protein_coding	chr19	48616185	57	251.5782472	expressed	low	0	437.5125065	650.983157	0	FALSE	2	ENSG00000063177.13;ENSG00000063176.16	RPL18;SPHK2	protein_coding;protein_coding	-;+	bidirectional	0	0	1
ENSG00000063180.9	-	CA11	protein_coding	chr19	48643188	42	3.5611233	expressed	low	0	1.748677836	2.794900511	0	FALSE	NA	NA	NA	NA	NA	none	14.1138686	0	1
ENSG00000063241.8	-	ISOC2	protein_coding	chr19	55459344	53	29.44358083	expressed	low	0	20.05533917	31.75325384	0	FALSE	NA	NA	NA	NA	NA	none	31.91185821	0	1
ENSG00000063244.12	+	U2AF2	protein_coding	chr19	55651146	55	62.97792668	expressed	low	0	64.60071756	133.8313067	0	FALSE	NA	NA	NA	NA	NA	none	135.7443384	0	1
ENSG00000063245.14	+	EPN1	protein_coding	chr19	55672226	44	1.794200456	expressed	low	0	48.57943523	97.52347583	0	FALSE	2	ENSG00000267523.1;ENSG00000063245.14	AC008735.2;EPN1	lncRNA;protein_coding	-;+	bidirectional	3.583665773	0	1
ENSG00000063322.15	+	MED29	protein_coding	chr19	39388303	43	7.282940252	expressed	low	0	41.39380214	81.09588028	0	FALSE	2	ENSG00000006712.15;ENSG00000063322.15	PAF1;MED29	protein_coding;protein_coding	-;+	bidirectional	0.588440282	0	1
ENSG00000063438.17	+	AHRR	protein_coding	chr5	318759	2	0.200003764	expressed	low	0	0	0.105459287	0	FALSE	NA	NA	NA	NA	NA	none	20.21140283	1	0
ENSG00000063515.2	-	GSC2	protein_coding	chr22	19147284	6	0	off	low	0	0.026633925	0.082906668	0	FALSE	NA	NA	NA	NA	NA	none	0.715407553	1	0
ENSG00000063587.14	+	ZNF275	protein_coding	chrX	153331147	13	4.275102584	expressed	low	0	2.917772946	5.932084905	0	FALSE	NA	NA	NA	NA	NA	none	18.94732305	0	1
ENSG00000063601.17	+	MTMR1	protein_coding	chrX	150689971	14	10.33038021	expressed	low	0	2.395313965	4.476960071	0	FALSE	NA	NA	NA	NA	NA	none	30.64777843	0	1
ENSG00000063660.9	+	GPC1	protein_coding	chr2	240432663	8	0.155511947	expressed	low	0	0.061081209	0.158188931	0	FALSE	NA	NA	NA	NA	NA	none	3.610177813	1	1
ENSG00000063761.16	+	ADCK1	protein_coding	chr14	77797109	40	2.147157376	expressed	low	0	0.559581527	1.055739494	0	FALSE	NA	NA	NA	NA	NA	none	30.88182894	0	1
ENSG00000063854.13	-	HAGH	protein_coding	chr16	1824158	55	4.435864181	expressed	low	0	16.04818885	20.90933665	0	FALSE	NA	NA	NA	NA	NA	none	0.481357042	0	1
ENSG00000063978.16	+	RNF4	protein_coding	chr4	2459220	12	11.84976285	expressed	low	0	0.463659826	0.768745808	0	FALSE	NA	NA	NA	NA	NA	none	2.019255388	1	0
ENSG00000064012.21	+	CASP8	protein_coding	chr2	201230443	40	8.294839202	expressed	low	0	2.303969058	5.32668563	0	FALSE	NA	NA	NA	NA	NA	none	7.9633103	0	1
ENSG00000064042.18	+	LIMCH1	protein_coding	chr4	41356607	0	0.002305494	expressed	low	0	0	0	0	FALSE	NA	NA	NA	NA	NA	none	1.805088907	1	0
ENSG00000064102.15	-	INTS13	protein_coding	chr12	26935327	48	44.22379224	expressed	low	0	21.28628255	38.19857443	0	FALSE	2	ENSG00000064102.15;ENSG00000111790.14	INTS13;FGFR1OP2	protein_coding;protein_coding	-;+	bidirectional	0.12033926	0	1
ENSG00000064115.11	-	TM7SF3	protein_coding	chr12	27011435	62	13.69111494	expressed	low	0	4.679134449	7.07549638	0	FALSE	NA	NA	NA	NA	NA	none	13.01755924	0	1
ENSG00000064195.7	-	DLX3	protein_coding	chr17	49992225	5	0	off	low	0	0	0	0	FALSE	2	ENSG00000064195.7;ENSG00000248172.1	DLX3;AC009720.1	protein_coding;lncRNA	-;+	bidirectional	0.361017781	1	0
ENSG00000064199.6	+	SPA17	protein_coding	chr11	124670798	26	1.054127478	expressed	low	0	5.67179608	8.198374834	0	FALSE	NA	NA	NA	NA	NA	none	15.61199889	0	1
ENSG00000064201.15	+	TSPAN32	protein_coding	chr11	2298997	41	2.799072146	expressed	low	0	5.314141983	7.585960121	0	FALSE	NA	NA	NA	NA	NA	none	0.829118803	0	1
ENSG00000064205.10	+	CCN5	protein_coding	chr20	44711844	4	0.028211016	expressed	low	0	0.359961641	0.580346676	0	FALSE	NA	NA	NA	NA	NA	none	1.076425334	1	0
ENSG00000064218.5	+	DMRT3	protein_coding	chr9	973655	0	0	off	low	0	0	0	0	FALSE	NA	NA	NA	NA	NA	none	0.481357042	1	0
ENSG00000064225.12	+	ST3GAL6	protein_coding	chr3	98729236	0	0.056642011	expressed	low	0	0	0.011141244	0	FALSE	NA	NA	NA	NA	NA	none	0	1	0
ENSG00000064270.12	+	ATP2C2	protein_coding	chr16	84365527	1	0.022077869	expressed	low	0	0	0	0	FALSE	NA	NA	NA	NA	NA	none	0.12033926	1	0
ENSG00000064300.9	+	NGFR	protein_coding	chr17	49492293	6	0.022622406	expressed	low	0	0	0.041453334	0	FALSE	NA	NA	NA	NA	NA	none	1.076425334	1	0
ENSG00000064309.14	-	CDON	protein_coding	chr11	126060336	12	0.03946343	expressed	low	0	0.041304623	0.121149959	0	FALSE	NA	NA	NA	NA	NA	none	2.995225491	1	1
ENSG00000064313.12	-	TAF2	protein_coding	chr8	119829842	41	18.65754579	expressed	low	0	16.63839909	35.70319017	0	FALSE	2	ENSG00000064313.12;ENSG00000286362.1	TAF2;AP005717.2	protein_coding;lncRNA	-;+	bidirectional	0.234050511	0	1
ENSG00000064393.16	-	HIPK2	protein_coding	chr7	139774999	27	1.955493392	expressed	low	0	4.236648487	7.147847569	0	FALSE	NA	NA	NA	NA	NA	none	0.12033926	1	1
ENSG00000064419.13	-	TNPO3	protein_coding	chr7	129052174	63	102.9077248	expressed	low	0	37.56818823	60.35605429	0	FALSE	2	ENSG00000064419.13;ENSG00000230359.5	TNPO3;TPI1P2	protein_coding;transcribed_processed_pseudogene	-;+	bidirectional	63.98485882	0	1
ENSG00000064489.23	-	BORCS8-MEF2B	protein_coding	chr19	19189159	57	0.011299854	expressed	low	0	34.95809387	50.09963781	0	FALSE	4	ENSG00000213999.17;ENSG00000064489.23;ENSG00000254901.8;ENSG00000064490.14	MEF2B;BORCS8-MEF2B;BORCS8;RFXANK	protein_coding;protein_coding;protein_coding;protein_coding	-;-;-;+	multiple_nearby_promoters	0	0	1
ENSG00000064490.14	+	RFXANK	protein_coding	chr19	19189229	57	35.06216018	expressed	low	0	34.91854664	49.95567334	0	FALSE	4	ENSG00000213999.17;ENSG00000064489.23;ENSG00000254901.8;ENSG00000064490.14	MEF2B;BORCS8-MEF2B;BORCS8;RFXANK	protein_coding;protein_coding;protein_coding;protein_coding	-;-;-;+	multiple_nearby_promoters	0	0	1
ENSG00000064545.15	-	TMEM161A	protein_coding	chr19	19135514	28	20.49463443	expressed	low	0	5.03192809	7.461600119	0	FALSE	NA	NA	NA	NA	NA	none	39.31324027	0	1
ENSG00000064547.14	-	LPAR2	protein_coding	chr19	19625931	6	1.431036589	expressed	low	0	7.2719092	19.56269777	0	FALSE	NA	NA	NA	NA	NA	none	29.98083711	0	0
ENSG00000064601.18	+	CTSA	protein_coding	chr20	45887144	37	7.760780683	expressed	low	0	17.9704317	25.70570125	0	FALSE	NA	NA	NA	NA	NA	none	0	0	1
ENSG00000064607.17	-	SUGP2	protein_coding	chr19	19031024	44	23.45240158	expressed	low	0	18.69139954	26.36432042	0	FALSE	NA	NA	NA	NA	NA	none	1.430815105	0	1
ENSG00000064651.14	+	SLC12A2	protein_coding	chr5	128080766	50	8.277012288	expressed	low	0	10.44220803	19.29123985	0	FALSE	2	ENSG00000245937.8;ENSG00000064651.14	LINC01184;SLC12A2	lncRNA;protein_coding	-;+	bidirectional	0	0	1
ENSG00000064652.11	+	SNX24	protein_coding	chr5	122840439	31	3.95864033	expressed	low	0	1.726381312	3.523533389	0	FALSE	NA	NA	NA	NA	NA	none	15.13726986	0	1
ENSG00000064655.19	+	EYA2	protein_coding	chr20	46891624	0	0.018971008	expressed	low	0	0	0	0	FALSE	NA	NA	NA	NA	NA	none	0.361017781	1	0
ENSG00000064666.15	+	CNN2	protein_coding	chr19	1023586	32	27.64089753	expressed	low	0	17.54695486	29.21222255	0	FALSE	NA	NA	NA	NA	NA	none	34.60012508	0	1
ENSG00000064687.12	+	ABCA7	protein_coding	chr19	1037101	59	11.15124692	expressed	low	0	81.30822543	155.8951913	0	FALSE	2	ENSG00000279753.1;ENSG00000064687.12	AC011558.1;ABCA7	TEC;protein_coding	-;+	bidirectional	116.2116803	0	1
ENSG00000064692.19	+	SNCAIP	protein_coding	chr5	122308354	0	0.005997363	expressed	low	0	0	0.165813336	0	FALSE	NA	NA	NA	NA	NA	none	0	1	0
ENSG00000064703.12	+	DDX20	protein_coding	chr1	111752245	50	15.07507265	expressed	low	0	5.68580615	13.59669355	0	FALSE	NA	NA	NA	NA	NA	none	0.361017781	0	1
ENSG00000064726.10	-	BTBD1	protein_coding	chr15	83064253	44	52.6685251	expressed	low	0	16.58269557	27.73228044	0	FALSE	2	ENSG00000064726.10;ENSG00000263643.1	BTBD1;MIR4515	protein_coding;miRNA	-;+	bidirectional	76.98916204	0	1
ENSG00000064763.11	+	FAR2	protein_coding	chr12	29146103	14	4.653536216	expressed	low	0	1.527061243	4.062426731	0	FALSE	NA	NA	NA	NA	NA	none	24.87149393	0	1
ENSG00000064787.13	-	BCAS1	protein_coding	chr20	54067595	9	0.39696734	expressed	low	0	0	0.047988159	0	FALSE	NA	NA	NA	NA	NA	none	0	0	0
ENSG00000064835.11	-	POU1F1	protein_coding	chr3	87273585	0	0	off	low	0	0	0	0	FALSE	NA	NA	NA	NA	NA	none	0.12033926	0	0
ENSG00000064886.14	+	CHI3L2	protein_coding	chr1	111197771	14	0.043630934	expressed	low	0	0.029564701	0.186326701	0	FALSE	NA	NA	NA	NA	NA	none	1.430815105	0	0
ENSG00000064932.16	-	SBNO2	protein_coding	chr19	1171269	36	7.050563986	expressed	low	0	1.402740105	4.385193574	0	FALSE	NA	NA	NA	NA	NA	none	45.00232556	0	1
ENSG00000064933.17	+	PMS1	protein_coding	chr2	189781085	38	7.204087683	expressed	low	0	22.28072727	33.86141348	0	FALSE	NA	NA	NA	NA	NA	none	0.354389771	0	1
ENSG00000064961.19	+	HMG20B	protein_coding	chr19	3569777	27	17.28021323	expressed	low	0	41.89033987	182.3517311	0	FALSE	NA	NA	NA	NA	NA	none	2.841746181	0	1
ENSG00000064989.13	-	CALCRL	protein_coding	chr2	187445461	6	0.109832324	expressed	low	0	0.031867911	0.161418168	0	FALSE	NA	NA	NA	NA	NA	none	0.354389771	0	0
ENSG00000064995.18	-	TAF11	protein_coding	chr6	34885072	55	48.11050899	expressed	low	0	23.05999892	47.71025435	0	FALSE	2	ENSG00000064995.18;ENSG00000064999.15	TAF11;ANKS1A	protein_coding;protein_coding	-;+	bidirectional	4.038510775	0	1
ENSG00000064999.15	+	ANKS1A	protein_coding	chr6	34886255	55	5.108620935	expressed	low	0	21.1479883	46.43952119	0	FALSE	2	ENSG00000064995.18;ENSG00000064999.15	TAF11;ANKS1A	protein_coding;protein_coding	-;+	bidirectional	1.203392604	0	1
ENSG00000065000.18	-	AP3D1	protein_coding	chr19	2161469	65	19.03204319	expressed	low	0	3.470123753	7.803987252	0	FALSE	NA	NA	NA	NA	NA	none	3.697377024	0	1
ENSG00000065029.15	+	ZNF76	protein_coding	chr6	35255909	59	3.233601944	expressed	low	0	3.164684108	4.8947922	0	FALSE	NA	NA	NA	NA	NA	none	86.93755259	0	1
ENSG00000065054.14	+	SLC9A3R2	protein_coding	chr16	2022356	18	3.347360738	expressed	low	0	3.180216762	7.080414629	0	FALSE	NA	NA	NA	NA	NA	none	16.3671745	0	1
ENSG00000065057.9	-	NTHL1	protein_coding	chr16	2044867	28	12.4278236	expressed	low	0	15.30845516	42.79303228	0	FALSE	2	ENSG00000065057.9;ENSG00000103197.18	NTHL1;TSC2	protein_coding;protein_coding	-;+	bidirectional	0.702151533	0	1
ENSG00000065060.17	+	UHRF1BP1	protein_coding	chr6	34789015	46	16.71082757	expressed	low	0	3.680527134	6.382425124	0	FALSE	NA	NA	NA	NA	NA	none	54.76409675	0	1
ENSG00000065135.11	+	GNAI3	protein_coding	chr1	109545615	45	11.02397088	expressed	low	0	27.59951147	44.23070737	0	FALSE	NA	NA	NA	NA	NA	none	36.39858598	0	1
ENSG00000065150.21	+	IPO5	protein_coding	chr13	97950658	0	49.37088748	expressed	low	0	0	0	0	FALSE	NA	NA	NA	NA	NA	none	0.361017781	1	0
ENSG00000065154.11	-	OAT	protein_coding	chr10	124415977	39	87.67788745	expressed	low	0	16.10546694	35.217471	0	FALSE	NA	NA	NA	NA	NA	none	59.97845301	0	1
ENSG00000065183.16	+	WDR3	protein_coding	chr1	117926720	26	29.54666534	expressed	low	0	8.714623503	16.24970692	0	FALSE	2	ENSG00000196505.11;ENSG00000065183.16	GDAP2;WDR3	protein_coding;protein_coding	-;+	bidirectional	0	0	1
ENSG00000065243.20	+	PKN2	protein_coding	chr1	88681222	59	9.04354461	expressed	low	0	4.221091256	7.585960121	0	FALSE	NA	NA	NA	NA	NA	none	0.829118803	0	1
ENSG00000065268.10	+	WDR18	protein_coding	chr19	981271	39	21.53919492	expressed	low	0	16.46938047	19.7468226	0	FALSE	NA	NA	NA	NA	NA	none	46.28069643	0	1
ENSG00000065308.5	-	TRAM2	protein_coding	chr6	52574061	44	6.950675573	expressed	low	0	6.526383957	7.77408173	0	FALSE	NA	NA	NA	NA	NA	none	0.240678521	0	1
ENSG00000065320.9	+	NTN1	protein_coding	chr17	9018510	0	0.021398943	expressed	low	0	0	0.026364822	0	FALSE	NA	NA	NA	NA	NA	none	0.481357042	1	0
ENSG00000065325.13	+	GLP2R	protein_coding	chr17	9819206	0	0	off	low	0	0	0.124217801	0	FALSE	2	ENSG00000214978.7;ENSG00000065325.13	GSG1L2;GLP2R	protein_coding;protein_coding	-;+	bidirectional	0	1	0
ENSG00000065328.16	+	MCM10	protein_coding	chr10	13158554	28	25.51954208	expressed	low	0	5.709053044	9.934822941	0	FALSE	2	ENSG00000237540.1;ENSG00000065328.16	RPL36AP36;MCM10	processed_pseudogene;protein_coding	-;+	bidirectional	17.47011188	0	1
ENSG00000065357.20	+	DGKA	protein_coding	chr12	55924319	63	0.781107209	expressed	low	0	9.053899246	10.86230658	0	FALSE	NA	NA	NA	NA	NA	none	5.930798892	0	1
ENSG00000065361.15	+	ERBB3	protein_coding	chr12	56073799	28	1.835442377	expressed	low	0	0.251794506	0.484254505	0	FALSE	NA	NA	NA	NA	NA	none	5.563153101	0	0
ENSG00000065371.17	-	ROPN1	protein_coding	chr3	123989179	1	0	off	low	0	0	0.011141244	0	FALSE	NA	NA	NA	NA	NA	none	0.361017781	0	0
ENSG00000065413.20	-	ANKRD44	protein_coding	chr2	197308174	0	0.021658607	expressed	low	0	0	0.124360002	0	FALSE	2	ENSG00000065413.20;ENSG00000225979.1	ANKRD44;AC010746.2	protein_coding;lncRNA	-;+	bidirectional	0.12033926	1	0
ENSG00000065427.14	-	KARS	protein_coding	chr16	75645644	48	135.5015077	expressed	low	0	40.25839079	64.21121435	0	FALSE	NA	NA	NA	NA	NA	none	1.918800157	0	1
ENSG00000065457.10	-	ADAT1	protein_coding	chr16	75620301	68	6.817039686	expressed	low	0	6.296638369	10.31745415	0	FALSE	NA	NA	NA	NA	NA	none	89.26480168	0	1
ENSG00000065485.20	+	PDIA5	protein_coding	chr3	123064025	20	5.655669215	expressed	low	0	1.499693551	2.818826711	0	FALSE	NA	NA	NA	NA	NA	none	26.89737733	0	1
ENSG00000065491.8	+	TBC1D22B	protein_coding	chr6	37254772	48	10.2186654	expressed	low	0	7.223532529	18.13579887	0	FALSE	3	ENSG00000172738.12;ENSG00000286105.1;ENSG00000065491.8	TMEM217;AL353579.1;TBC1D22B	protein_coding;protein_coding;protein_coding	-;-;+	multiple_nearby_promoters	0	0	1
ENSG00000065518.8	+	NDUFB4	protein_coding	chr3	120593328	29	32.40814761	expressed	low	0	46.33865156	70.34134456	0	FALSE	NA	NA	NA	NA	NA	none	13.09813044	0	1
ENSG00000065526.11	+	SPEN	protein_coding	chr1	15844707	70	6.791161684	expressed	low	0	5.029728353	9.280417273	0	TRUE	NA	NA	NA	NA	NA	none	1.069797324	0	1
ENSG00000065534.18	-	MYLK	protein_coding	chr3	123881332	1	0.073768563	expressed	low	0	0	0	0	FALSE	NA	NA	NA	NA	NA	none	0.240678521	0	0
ENSG00000065548.18	+	ZC3H15	protein_coding	chr2	186483253	57	102.4392863	expressed	low	0	36.8439589	91.26174562	0	FALSE	NA	NA	NA	NA	NA	none	26.94480848	0	1
ENSG00000065559.15	+	MAP2K4	protein_coding	chr17	12017829	8	6.958100843	expressed	low	0	1.512081651	3.689346725	0	FALSE	NA	NA	NA	NA	NA	none	14.96287144	0	1
ENSG00000065600.12	-	PACC1	protein_coding	chr1	212411902	31	11.43104964	expressed	low	0	3.11608045	5.838236624	0	FALSE	NA	NA	NA	NA	NA	none	20.68613186	0	1
ENSG00000065609.14	-	SNAP91	protein_coding	chr6	83706692	2	0.015060757	expressed	low	0	0	0.0621089	0	FALSE	NA	NA	NA	NA	NA	none	1.444071125	1	0
ENSG00000065613.15	+	SLK	protein_coding	chr10	103964140	44	24.98883505	expressed	low	0	10.74987131	18.7783603	0	FALSE	NA	NA	NA	NA	NA	none	43.21152775	0	1
ENSG00000065615.14	+	CYB5R4	protein_coding	chr6	83856656	40	5.842475031	expressed	low	0	3.889793511	9.327000148	0	FALSE	NA	NA	NA	NA	NA	none	17.49103099	0	1
ENSG00000065618.21	-	COL17A1	protein_coding	chr10	104082881	0	0.089779445	expressed	low	0	0	0.047988159	0	FALSE	NA	NA	NA	NA	NA	none	0.12033926	1	0
ENSG00000065621.15	+	GSTO2	protein_coding	chr10	104265873	7	0.147735396	expressed	low	0	99.41953175	161.4444351	0	FALSE	2	ENSG00000266852.2;ENSG00000065621.15	MIR4482;GSTO2	miRNA;protein_coding	-;+	bidirectional	55.78956817	0	0
ENSG00000065665.21	+	SEC61A2	protein_coding	chr10	12126637	24	1.841542192	expressed	low	0	0.52526623	1.535621082	0	FALSE	NA	NA	NA	NA	NA	none	33.76541335	0	1
ENSG00000065675.15	-	PRKCQ	protein_coding	chr10	6577302	34	14.50405938	expressed	low	0	17.63025336	26.50761099	0	FALSE	2	ENSG00000065675.15;ENSG00000237943.7	PRKCQ;PRKCQ-AS1	protein_coding;lncRNA	-;+	bidirectional	0	0	1
ENSG00000065717.15	-	TLE2	protein_coding	chr19	3044636	44	3.628172699	expressed	low	0	0.104511386	0.231042394	0	FALSE	NA	NA	NA	NA	NA	none	6.926653026	0	1
ENSG00000065802.12	+	ASB1	protein_coding	chr2	238423742	30	5.782773146	expressed	low	0	3.230822208	4.186786733	0	FALSE	NA	NA	NA	NA	NA	none	2.146222658	0	1
ENSG00000065809.13	-	FAM107B	protein_coding	chr10	14771898	0	1.788034434	expressed	low	0	0	0.011141244	0	FALSE	NA	NA	NA	NA	NA	none	0.234050511	1	0
ENSG00000065833.9	-	ME1	protein_coding	chr6	83428052	43	4.897534041	expressed	low	0	1.753921428	3.60500576	0	FALSE	NA	NA	NA	NA	NA	none	11.61325617	0	1
ENSG00000065882.16	+	TBC1D1	protein_coding	chr4	37888084	1	1.598185297	expressed	low	0	0.018172494	0.052729644	0	FALSE	NA	NA	NA	NA	NA	none	0.601696302	1	0
ENSG00000065883.16	+	CDK13	protein_coding	chr7	39947121	58	4.102533977	expressed	low	0	14.82950662	23.75276038	0	FALSE	2	ENSG00000259826.1;ENSG00000065883.16	AC072061.1;CDK13	lncRNA;protein_coding	-;+	bidirectional	0.240678521	0	1
ENSG00000065911.12	+	MTHFD2	protein_coding	chr2	74195610	50	126.5043084	expressed	low	0	28.44891177	75.67732647	0	FALSE	2	ENSG00000279070.2;ENSG00000065911.12	AC073263.2;MTHFD2	lncRNA;protein_coding	-;+	bidirectional	0.240678521	0	1
ENSG00000065923.10	-	SLC9A7	protein_coding	chrX	46756119	2	0.018448287	expressed	low	0	0	0.041453334	0	FALSE	NA	NA	NA	NA	NA	none	0	1	0
ENSG00000065970.9	+	FOXJ2	protein_coding	chr12	8029716	31	1.372499411	expressed	low	0	4.313058671	8.621296728	0	FALSE	NA	NA	NA	NA	NA	none	30.94251612	0	1
ENSG00000065978.19	+	YBX1	protein_coding	chr1	42679418	59	344.0890166	expressed	low	0	200.858467	361.8044495	0	FALSE	2	ENSG00000285728.2;ENSG00000065978.19	AC098484.4;YBX1	lncRNA;protein_coding	-;+	bidirectional	0.708779543	0	1
ENSG00000065989.16	+	PDE4A	protein_coding	chr19	10413773	68	1.395394658	expressed	low	0	2.893207069	4.116163294	0	FALSE	NA	NA	NA	NA	NA	none	72.76506698	0	1
ENSG00000066027.12	+	PPP2R5A	protein_coding	chr1	212282410	59	48.73674803	expressed	low	0	24.05708623	34.24045388	0	FALSE	NA	NA	NA	NA	NA	none	98.85217446	0	1
ENSG00000066032.18	+	CTNNA2	protein_coding	chr2	79182231	0	0.024865131	expressed	low	0	0	0	0	FALSE	NA	NA	NA	NA	NA	none	0.12033926	0	0
ENSG00000066044.15	-	ELAVL1	protein_coding	chr19	8002660	42	14.21263457	expressed	low	0	6.169458545	19.58540443	0	FALSE	NA	NA	NA	NA	NA	none	20.46533737	0	1
ENSG00000066056.14	+	TIE1	protein_coding	chr1	43297982	0	0.02372433	expressed	low	0	0.026297289	0.080709084	0	FALSE	NA	NA	NA	NA	NA	none	0.361017781	1	0
ENSG00000066084.13	+	DIP2B	protein_coding	chr12	50501985	29	15.67831139	expressed	low	0	2.316142201	7.246211983	0	FALSE	NA	NA	NA	NA	NA	none	30.82776978	0	1
ENSG00000066117.15	+	SMARCD1	protein_coding	chr12	50082200	20	13.01431919	expressed	low	0	19.01016674	26.05002992	0	FALSE	NA	NA	NA	NA	NA	none	31.4503852	0	1
ENSG00000066135.13	+	KDM4A	protein_coding	chr1	43647149	50	10.05841155	expressed	low	0	2.188652168	4.174969818	0	FALSE	2	ENSG00000066135.13;ENSG00000284989.1	KDM4A;AL451062.3	protein_coding;protein_coding	+;+	nearby_same_strand	0	0	1
ENSG00000066136.20	+	NFYC	protein_coding	chr1	40688648	65	9.74832197	expressed	low	0	18.89675552	26.77739262	0	FALSE	NA	NA	NA	NA	NA	none	0	0	1
ENSG00000066185.13	-	ZMYND12	protein_coding	chr1	42453254	26	0	off	low	1	6.967634148	10.74934758	0	FALSE	NA	NA	NA	NA	NA	none	0	0	1
ENSG00000066230.12	-	SLC9A3	protein_coding	chr5	521450	0	0.629309579	expressed	low	0	0	0.057760598	0	FALSE	NA	NA	NA	NA	NA	none	0	1	0
ENSG00000066248.15	-	NGEF	protein_coding	chr2	233010257	0	0.054390147	expressed	low	0	0	0.026364822	0	FALSE	NA	NA	NA	NA	NA	none	0.361017781	1	0
ENSG00000066279.18	-	ASPM	protein_coding	chr1	197143695	43	32.12018736	expressed	low	0	14.19473036	35.70319017	0	FALSE	NA	NA	NA	NA	NA	none	23.42845789	0	1
ENSG00000066294.14	-	CD84	protein_coding	chr1	160576517	20	3.290307243	expressed	low	0	0.683656373	1.775561877	0	FALSE	NA	NA	NA	NA	NA	none	0.842374823	0	1
ENSG00000066322.15	-	ELOVL1	protein_coding	chr1	43365075	55	29.91660938	expressed	low	0	24.86921802	27.88653272	0	FALSE	NA	NA	NA	NA	NA	none	99.4803828	0	1
ENSG00000066336.11	-	SPI1	protein_coding	chr11	47375577	68	2.620271277	expressed	low	0	5.729264952	13.29150361	0	FALSE	NA	NA	NA	NA	NA	none	20.5800837	0	1
ENSG00000066379.15	+	ZNRD1	protein_coding	chr6	30055899	0	22.21566302	expressed	low	0	34.81827394	63.58941434	0	FALSE	2	ENSG00000275856.1;ENSG00000066379.15	AL669914.2;ZNRD1	misc_RNA;protein_coding	+;+	nearby_same_strand	6.311700704	0	1
ENSG00000066382.16	-	MPPED2	protein_coding	chr11	30583873	1	0.003055053	expressed	low	0	0	0	0	FALSE	NA	NA	NA	NA	NA	none	0.12033926	1	0
ENSG00000066405.13	+	CLDN18	protein_coding	chr3	137995735	0	0.012608261	expressed	low	0	0	0	0	FALSE	NA	NA	NA	NA	NA	none	0	1	0
ENSG00000066422.5	-	ZBTB11	protein_coding	chr3	101674133	13	14.48621316	expressed	low	0	23.70123305	35.99111912	0	FALSE	NA	NA	NA	NA	NA	none	14.70334397	0	1
ENSG00000066427.24	-	ATXN3	protein_coding	chr14	92103622	31	2.835548516	expressed	low	0	1.244579449	2.750104065	0	FALSE	NA	NA	NA	NA	NA	none	15.86593343	0	1
ENSG00000066455.13	+	GOLGA5	protein_coding	chr14	92791305	31	15.12449357	expressed	low	0	1.806542414	3.026093381	0	FALSE	NA	NA	NA	NA	NA	none	14.32140707	0	1
ENSG00000066468.22	-	FGFR2	protein_coding	chr10	121595459	3	0	off	low	0	0	0	0	FALSE	NA	NA	NA	NA	NA	none	2.406785209	1	0
ENSG00000066557.6	-	LRRC40	protein_coding	chr1	70202580	34	20.63021081	expressed	low	0	10.04918087	17.32372534	0	FALSE	2	ENSG00000066557.6;ENSG00000116754.13	LRRC40;SRSF11	protein_coding;protein_coding	-;+	bidirectional	0	0	1
ENSG00000066583.12	+	ISOC1	protein_coding	chr5	129091749	31	33.91632175	expressed	low	0	12.9111341	14.31609824	0	FALSE	NA	NA	NA	NA	NA	none	24.38350888	0	1
ENSG00000066629.17	+	EML1	protein_coding	chr14	99734693	1	0.015726813	expressed	low	0	0	0.026903028	0	FALSE	NA	NA	NA	NA	NA	none	0.12033926	1	0
ENSG00000066651.20	+	TRMT11	protein_coding	chr6	125983479	38	18.75840905	expressed	low	0	4.611841397	13.62863711	0	FALSE	NA	NA	NA	NA	NA	none	34.96114286	0	1
ENSG00000066654.14	-	THUMPD1	protein_coding	chr16	20739085	69	31.65316291	expressed	low	0	13.28486004	25.04981891	0	TRUE	NA	NA	NA	NA	NA	none	56.14499302	0	1
ENSG00000066697.14	+	MSANTD3	protein_coding	chr9	100424156	42	7.951219656	expressed	low	0	1.17702095	2.475078582	0	FALSE	NA	NA	NA	NA	NA	none	24.8516099	0	1
ENSG00000066735.14	+	KIF26A	protein_coding	chr14	104135723	0	0.003706672	expressed	low	0	0	0.041453334	0	FALSE	2	ENSG00000258748.1;ENSG00000066735.14	AL359399.1;KIF26A	lncRNA;protein_coding	-;+	bidirectional	0	0	0
ENSG00000066739.12	-	ATG2B	protein_coding	chr14	96360342	20	6.858091489	expressed	low	0	7.45162405	19.43520432	0	FALSE	2	ENSG00000066739.12;ENSG00000100744.15	ATG2B;GSKIP	protein_coding;protein_coding	-;+	bidirectional	0	0	1
ENSG00000066777.9	-	ARFGEF1	protein_coding	chr8	67340782	33	12.82816695	expressed	low	0	7.333350753	12.64326687	0	FALSE	2	ENSG00000066777.9;ENSG00000271966.1	ARFGEF1;AC021321.1	protein_coding;lncRNA	-;+	bidirectional	0.822490793	0	1
ENSG00000066813.14	-	ACSM2B	protein_coding	chr16	20573428	0	0.103062779	expressed	low	0	0	0	0	FALSE	NA	NA	NA	NA	NA	none	2.527124469	0	0
ENSG00000066827.16	-	ZFAT	protein_coding	chr8	134710050	65	1.722683884	expressed	low	0	0.456812717	1.919526353	0	FALSE	NA	NA	NA	NA	NA	none	28.79629346	0	1
ENSG00000066855.16	+	MTFR1	protein_coding	chr8	65641734	39	12.23929872	expressed	low	0	2.243881707	6.300906767	0	FALSE	NA	NA	NA	NA	NA	none	50.0045855	0	1
ENSG00000066923.17	+	STAG3	protein_coding	chr7	100174563	10	0.90439348	expressed	low	0	1.39179496	3.052700745	0	FALSE	2	ENSG00000213420.8;ENSG00000066923.17	GPC2;STAG3	protein_coding;protein_coding	-;+	bidirectional	0.12033926	0	0
ENSG00000066926.11	-	FECH	protein_coding	chr18	57583703	61	10.10623336	expressed	low	0	4.034579718	4.950157163	0	FALSE	NA	NA	NA	NA	NA	none	2.74129095	0	1
ENSG00000066933.16	-	MYO9A	protein_coding	chr15	72115578	31	2.792142717	expressed	low	0	1.514062967	3.215206641	0	FALSE	NA	NA	NA	NA	NA	none	38.95781541	0	1
ENSG00000067048.17	+	DDX3Y	protein_coding	chrY	12901108	0	0	off	low	0	0	0	0	FALSE	NA	NA	NA	NA	NA	none	0.601696302	0	0
ENSG00000067057.17	+	PFKP	protein_coding	chr10	3063333	33	32.36746859	expressed	low	0	8.669308886	14.09413356	0	FALSE	2	ENSG00000273001.1;ENSG00000067057.17	AL731533.2;PFKP	lncRNA;protein_coding	-;+	bidirectional	5.475953891	1	1
ENSG00000067064.11	-	IDI1	protein_coding	chr10	1046171	45	40.32873347	expressed	low	0	22.45288668	80.5647226	0	FALSE	2	ENSG00000067064.11;ENSG00000047056.16	IDI1;WDR37	protein_coding;protein_coding	-;+	bidirectional	2.273189928	0	1
ENSG00000067066.17	+	SP100	protein_coding	chr2	230412942	30	3.375990093	expressed	low	0	3.800679443	5.902543536	0	FALSE	NA	NA	NA	NA	NA	none	5.970566952	0	1
ENSG00000067082.15	-	KLF6	protein_coding	chr10	3782282	68	2.570813822	expressed	low	0	4.963587187	5.230709312	0	FALSE	NA	NA	NA	NA	NA	none	102.6423436	0	1
ENSG00000067113.17	-	PLPP1	protein_coding	chr5	55531970	2	0.137328392	expressed	low	0	0.026784165	0.124217801	0	FALSE	NA	NA	NA	NA	NA	none	1.791832887	1	0
ENSG00000067141.17	+	NEO1	protein_coding	chr15	73048710	5	1.449299609	expressed	low	0	0.192597501	0.58002608	0	FALSE	NA	NA	NA	NA	NA	none	1.444071125	1	0
ENSG00000067167.8	-	TRAM1	protein_coding	chr8	70605417	33	26.22177371	expressed	low	0	17.26932545	22.98632808	0	FALSE	2	ENSG00000067167.8;ENSG00000246366.6	TRAM1;LACTB2-AS1	protein_coding;lncRNA	-;+	bidirectional	0.12033926	0	1
ENSG00000067177.15	-	PHKA1	protein_coding	chrX	72711320	31	5.038177217	expressed	low	0	3.122381433	3.551123753	0	FALSE	NA	NA	NA	NA	NA	none	14.65591281	0	1
ENSG00000067182.7	-	TNFRSF1A	protein_coding	chr12	6339115	41	7.646897663	expressed	low	0	6.828382188	11.44233266	0	FALSE	NA	NA	NA	NA	NA	none	14.04096049	0	1
ENSG00000067191.16	-	CACNB1	protein_coding	chr17	39194704	50	0.806890956	expressed	low	0	120.3933992	176.576065	0	FALSE	NA	NA	NA	NA	NA	none	6.231129503	0	1
ENSG00000067208.14	-	EVI5	protein_coding	chr1	92789405	46	5.941450645	expressed	low	0	0.12326121	0.575857906	0	FALSE	NA	NA	NA	NA	NA	none	0.361017781	0	1
ENSG00000067221.14	-	STOML1	protein_coding	chr15	73991623	35	1.377667885	expressed	low	0	2.783812634	7.156205465	0	FALSE	2	ENSG00000067221.14;ENSG00000140464.20	STOML1;PML	protein_coding;protein_coding	-;+	bidirectional	0.240678521	0	1
ENSG00000067225.18	-	PKM	protein_coding	chr15	72228823	76	108.5357162	expressed	low	0	52.34035352	128.2134313	0	TRUE	NA	NA	NA	NA	NA	none	62.44696047	0	1
ENSG00000067248.10	-	DHX29	protein_coding	chr5	55304695	53	26.56984429	expressed	low	0	23.74400588	44.68669404	0	FALSE	2	ENSG00000067248.10;ENSG00000039123.16	DHX29;MTREX	protein_coding;protein_coding	-;+	bidirectional	0	0	1
ENSG00000067334.14	-	DNTTIP2	protein_coding	chr1	93876919	42	21.80986736	expressed	low	0	47.27636881	90.16429425	0	FALSE	NA	NA	NA	NA	NA	none	48.11892539	0	1
ENSG00000067365.14	+	METTL22	protein_coding	chr16	8618683	19	2.259633499	expressed	low	0	2.218326461	3.399173387	0	FALSE	NA	NA	NA	NA	NA	none	26.07592162	1	1
ENSG00000067369.13	-	TP53BP1	protein_coding	chr15	43507729	54	13.69838918	expressed	low	0	1.038784947	2.975265847	0	FALSE	2	ENSG00000067369.13;ENSG00000166963.13	TP53BP1;MAP1A	protein_coding;protein_coding	-;+	bidirectional	0	0	1
ENSG00000067445.21	+	TRO	protein_coding	chrX	54917462	2	0.04412535	expressed	low	0	0.359625721	0.621089003	0	FALSE	NA	NA	NA	NA	NA	none	1.805088907	1	0
ENSG00000067533.6	+	RRP15	protein_coding	chr1	218282293	37	11.73187255	expressed	low	0	8.116648803	28.36045386	0	FALSE	NA	NA	NA	NA	NA	none	12.85082391	0	1
ENSG00000067560.12	-	RHOA	protein_coding	chr3	49409999	32	120.2446926	expressed	low	0	49.24804065	78.66993515	0	FALSE	NA	NA	NA	NA	NA	none	5.36887065	0	1
ENSG00000067596.12	+	DHX8	protein_coding	chr17	43480865	38	10.8277361	expressed	low	0	3.266369438	9.327000148	0	FALSE	NA	NA	NA	NA	NA	none	14.74974004	0	1
ENSG00000067606.17	+	PRKCZ	protein_coding	chr1	2047411	1	0.20243959	expressed	low	0	0.042166573	0.210918574	0	FALSE	2	ENSG00000226969.1;ENSG00000067606.17	AL391845.1;PRKCZ	lncRNA;protein_coding	-;+	bidirectional	0	1	0
ENSG00000067646.12	+	ZFY	protein_coding	chrY	2932281	0	0.054496232	expressed	low	0	0	0.057760598	0	FALSE	2	ENSG00000278847.1;ENSG00000067646.12	AC006157.1;ZFY	lncRNA;protein_coding	-;+	bidirectional	0	0	0
ENSG00000067704.10	+	IARS2	protein_coding	chr1	220091132	37	91.05544083	expressed	low	0	26.51056234	35.44260056	0	FALSE	NA	NA	NA	NA	NA	none	27.5597608	0	1
ENSG00000067715.14	+	SYT1	protein_coding	chr12	78860993	0	0.051319116	expressed	low	0	0	0.082906668	0	FALSE	NA	NA	NA	NA	NA	none	9.627140835	0	0
ENSG00000067798.16	+	NAV3	protein_coding	chr12	77321641	4	0	off	low	0	0	0	0	FALSE	NA	NA	NA	NA	NA	none	1.323731865	1	0
ENSG00000067829.19	-	IDH3G	protein_coding	chrX	153791524	33	15.40070679	expressed	low	0	91.9930385	118.2249085	0	FALSE	NA	NA	NA	NA	NA	none	6.471808024	0	1
ENSG00000067836.12	-	ROGDI	protein_coding	chr16	4799951	32	3.896189186	expressed	low	0	80.35116236	105.8547595	0	FALSE	NA	NA	NA	NA	NA	none	14.82264815	0	1
ENSG00000067840.12	-	PDZD4	protein_coding	chrX	153827566	3	0.037391497	expressed	low	0	0	0.026903028	0	FALSE	NA	NA	NA	NA	NA	none	2.279817938	1	0
ENSG00000067842.17	+	ATP2B3	protein_coding	chrX	153514676	1	0.023576347	expressed	low	0	0	0	0	FALSE	NA	NA	NA	NA	NA	none	0.481357042	1	0
ENSG00000067900.8	-	ROCK1	protein_coding	chr18	21108814	26	9.385861848	expressed	low	0	9.900072795	15.44233811	0	FALSE	NA	NA	NA	NA	NA	none	14.9363594	0	1
ENSG00000067955.15	+	CBFB	protein_coding	chr16	67025984	46	28.37509872	expressed	low	0	16.18633321	26.23996042	0	FALSE	NA	NA	NA	NA	NA	none	85.49141131	0	1
ENSG00000067992.15	+	PDK3	protein_coding	chrX	24462221	16	0.265425171	expressed	low	0	0.266339249	0.351334881	0	FALSE	NA	NA	NA	NA	NA	none	0.601696302	1	0
ENSG00000068001.14	-	HYAL2	protein_coding	chr3	50319783	26	3.830410387	expressed	low	0	20.18899582	26.99523323	0	FALSE	NA	NA	NA	NA	NA	none	57.61247094	0	1
ENSG00000068024.16	-	HDAC4	protein_coding	chr2	239398655	48	1.184412565	expressed	low	0	1.265242019	3.2631948	0	FALSE	NA	NA	NA	NA	NA	none	0	0	1
ENSG00000068028.17	-	RASSF1	protein_coding	chr3	50337981	36	15.53641419	expressed	low	0	6.779813962	8.083400128	0	FALSE	2	ENSG00000068028.17;ENSG00000235058.1	RASSF1;ZMYND10-AS1	protein_coding;lncRNA	-;+	bidirectional	0	0	1
ENSG00000068078.18	+	FGFR3	protein_coding	chr4	1790293	19	11.34979467	expressed	low	0	1.275369083	3.282169424	0	FALSE	NA	NA	NA	NA	NA	none	65.49313988	0	1
ENSG00000068079.7	+	IFI35	protein_coding	chr17	43003725	25	10.50288444	expressed	low	0	2.754352104	6.190472489	0	FALSE	NA	NA	NA	NA	NA	none	58.76594471	0	1
ENSG00000068097.14	-	HEATR6	protein_coding	chr17	60075932	36	7.521994746	expressed	low	0	4.688853173	6.606757452	0	FALSE	2	ENSG00000068097.14;ENSG00000267416.1	HEATR6;AC025048.4	protein_coding;lncRNA	-;+	bidirectional	0.234050511	0	1
ENSG00000068120.15	+	COASY	protein_coding	chr17	42558467	52	15.62866206	expressed	low	0	46.60337091	79.55225398	0	FALSE	NA	NA	NA	NA	NA	none	37.94974034	0	1
ENSG00000068137.15	-	PLEKHH3	protein_coding	chr17	42673995	55	8.041211262	expressed	low	0	10.64909859	19.02044084	0	FALSE	NA	NA	NA	NA	NA	none	27.01875167	0	1
ENSG00000068305.17	+	MEF2A	protein_coding	chr15	99562417	42	3.055448695	expressed	low	0	0.823595745	1.370970733	0	FALSE	NA	NA	NA	NA	NA	none	23.53450605	1	1
ENSG00000068308.13	-	OTUD5	protein_coding	chrX	48955387	51	28.37057074	expressed	low	0	29.78198654	58.81712854	0	FALSE	2	ENSG00000068308.13;ENSG00000223309.1	OTUD5;RNU6-722P	protein_coding;snRNA	-;-	nearby_same_strand	46.76205348	0	1
ENSG00000068323.17	-	TFE3	protein_coding	chrX	49040411	37	6.216053851	expressed	low	0	3.713054009	7.144866707	0	FALSE	NA	NA	NA	NA	NA	none	11.25223839	0	1
ENSG00000068354.16	+	TBC1D25	protein_coding	chrX	48536714	37	1.986124423	expressed	low	0	2.381151981	4.43899963	0	FALSE	NA	NA	NA	NA	NA	none	13.72633878	0	1
ENSG00000068366.20	-	ACSL4	protein_coding	chrX	109730404	31	21.03320721	expressed	low	0	7.713947668	8.166306796	0	FALSE	NA	NA	NA	NA	NA	none	10.11616097	0	1
ENSG00000068383.19	+	INPP5A	protein_coding	chr10	132534787	17	5.887732869	expressed	low	0	1.165907971	2.555787666	0	FALSE	NA	NA	NA	NA	NA	none	21.66872997	0	1
ENSG00000068394.11	-	GPKOW	protein_coding	chrX	49120736	30	33.42711258	expressed	low	0	11.21718805	16.08389359	0	FALSE	NA	NA	NA	NA	NA	none	24.72567771	0	1
ENSG00000068400.13	-	GRIPAP1	protein_coding	chrX	48999265	25	8.519800709	expressed	low	0	5.086810559	11.30381985	0	FALSE	NA	NA	NA	NA	NA	none	14.70893689	0	1
ENSG00000068438.15	+	FTSJ1	protein_coding	chrX	48473021	34	29.36254411	expressed	low	0	28.06395035	35.69604987	0	FALSE	NA	NA	NA	NA	NA	none	17.65113831	0	1
ENSG00000068489.12	+	PRR11	protein_coding	chr17	59152499	60	12.62732803	expressed	low	0	17.12786455	24.42597284	0	FALSE	2	ENSG00000182628.13;ENSG00000068489.12	SKA2;PRR11	protein_coding;protein_coding	-;+	bidirectional	0	0	1
ENSG00000068615.18	-	REEP1	protein_coding	chr2	86335084	2	0.10733297	expressed	low	0	0	0.0621089	0	FALSE	NA	NA	NA	NA	NA	none	0.240678521	1	0
ENSG00000068650.18	+	ATP11A	protein_coding	chr13	112687329	32	1.745892995	expressed	low	0	5.006577172	6.335107826	0	FALSE	2	ENSG00000274922.1;ENSG00000068650.18	AL139384.1;ATP11A	lncRNA;protein_coding	-;+	bidirectional	0.240678521	0	1
ENSG00000068654.16	-	POLR1A	protein_coding	chr2	86103156	37	14.07604716	expressed	low	0	18.31316701	38.92468062	0	FALSE	2	ENSG00000068654.16;ENSG00000132300.19	POLR1A;PTCD3	protein_coding;protein_coding	-;+	bidirectional	0	0	1
ENSG00000068697.7	-	LAPTM4A	protein_coding	chr2	20048629	59	17.79357577	expressed	low	0	12.59321602	23.35204657	0	FALSE	2	ENSG00000068697.7;ENSG00000223734.2	LAPTM4A;LAPTM4A-DT	protein_coding;lncRNA	-;+	bidirectional	0.595068292	0	1
ENSG00000068724.17	+	TTC7A	protein_coding	chr2	46913157	46	3.732363699	expressed	low	0	18.74600825	26.23762867	0	FALSE	NA	NA	NA	NA	NA	none	38.21796598	0	1
ENSG00000068745.15	-	IP6K2	protein_coding	chr3	48737354	58	11.75818921	expressed	low	0	0.078541585	0.383905271	0	FALSE	NA	NA	NA	NA	NA	none	9.641431936	0	1
ENSG00000068781.21	+	STON1-GTF2A1L	protein_coding	chr2	48526925	3	0	off	low	0	0.570822698	1.345151403	0	FALSE	2	ENSG00000243244.6;ENSG00000068781.21	STON1;STON1-GTF2A1L	protein_coding;protein_coding	+;+	nearby_same_strand	0.354389771	0	0
ENSG00000068784.13	-	SRBD1	protein_coding	chr2	45609166	41	12.62014157	expressed	low	0	1.128505023	3.482080055	0	FALSE	NA	NA	NA	NA	NA	none	16.13312399	0	1
ENSG00000068796.16	+	KIF2A	protein_coding	chr5	62303162	63	28.17031313	expressed	low	0	12.05429163	16.63505237	0	FALSE	NA	NA	NA	NA	NA	none	34.41909865	0	1
ENSG00000068831.19	-	RASGRP2	protein_coding	chr11	64742457	42	3.783106388	expressed	low	0	5.092071204	7.534140936	0	FALSE	NA	NA	NA	NA	NA	none	30.5835685	0	1
ENSG00000068878.15	-	PSME4	protein_coding	chr2	53967994	46	14.03704454	expressed	low	0	6.515658797	11.66112259	0	FALSE	NA	NA	NA	NA	NA	none	0.474729032	0	1
ENSG00000068885.15	-	IFT80	protein_coding	chr3	160396881	34	3.059567023	expressed	low	0	51.74769113	75.67821794	0	FALSE	NA	NA	NA	NA	NA	none	0.708779543	0	1
ENSG00000068903.20	-	SIRT2	protein_coding	chr19	38896863	0	7.356319787	expressed	low	0	12.69425632	20.30961038	0	FALSE	NA	NA	NA	NA	NA	none	0.234050511	0	1
ENSG00000068912.14	+	ERLEC1	protein_coding	chr2	53784044	43	28.21488483	expressed	low	0	9.388534973	21.69064779	0	FALSE	NA	NA	NA	NA	NA	none	33.23662515	0	1
ENSG00000068971.14	+	PPP2R5B	protein_coding	chr11	64914553	38	3.878198556	expressed	low	0	3.362787822	5.140213415	0	FALSE	2	ENSG00000110046.13;ENSG00000068971.14	ATG2A;PPP2R5B	protein_coding;protein_coding	-;+	bidirectional	1.069797324	0	1
ENSG00000068976.14	-	PYGM	protein_coding	chr11	64756975	15	0.31969419	expressed	low	0	0.43112333	1.871538194	0	FALSE	NA	NA	NA	NA	NA	none	155.828774	0	1
ENSG00000068985.5	-	PAGE1	protein_coding	chrX	49692985	5	85.56131307	expressed	low	0	20.75203471	50.30948129	0	FALSE	NA	NA	NA	NA	NA	none	2.039139418	1	1
ENSG00000069011.16	-	PITX1	protein_coding	chr5	135031814	37	14.11063886	expressed	low	0	7.727655413	20.12346499	0	FALSE	NA	NA	NA	NA	NA	none	0	0	1
ENSG00000069018.18	-	TRPC7	protein_coding	chr5	136362546	3	0	off	low	0	0	0	0	FALSE	NA	NA	NA	NA	NA	none	0	0	0
ENSG00000069020.18	+	MAST4	protein_coding	chr5	66593361	3	1.701956135	expressed	low	0	0	0.047988159	0	FALSE	NA	NA	NA	NA	NA	none	1.805088907	1	0
ENSG00000069122.19	-	ADGRF5	protein_coding	chr6	46951944	0	0	off	low	0	0	0	0	FALSE	NA	NA	NA	NA	NA	none	0.240678521	1	0
ENSG00000069188.17	-	SDK2	protein_coding	chr17	73641446	0	0.010195311	expressed	low	0	0	0	0	FALSE	NA	NA	NA	NA	NA	none	0.601696302	1	0
ENSG00000069206.15	+	ADAM7	protein_coding	chr8	24437930	1	0	off	low	0	0	0.012114996	0	FALSE	NA	NA	NA	NA	NA	none	0	0	0
ENSG00000069248.12	-	NUP133	protein_coding	chr1	229505342	46	47.17631256	expressed	low	0	12.64873982	29.51271768	0	FALSE	2	ENSG00000069248.12;ENSG00000223635.2	NUP133;AL121990.1	protein_coding;lncRNA	-;+	bidirectional	0	0	1
ENSG00000069275.13	-	NUCKS1	protein_coding	chr1	205747183	66	139.135443	expressed	low	0	38.70420224	68.04198502	0	FALSE	NA	NA	NA	NA	NA	none	74.03929754	0	1
ENSG00000069329.18	-	VPS35	protein_coding	chr16	46686519	46	24.27961015	expressed	low	0	18.87987167	26.00958208	0	FALSE	2	ENSG00000069329.18;ENSG00000091651.9	VPS35;ORC6	protein_coding;protein_coding	-;+	bidirectional	0.12033926	0	1
ENSG00000069345.12	-	DNAJA2	protein_coding	chr16	46970675	44	38.29715127	expressed	low	0	41.91107671	102.9871471	0	FALSE	2	ENSG00000069345.12;ENSG00000261173.1	DNAJA2;AC018845.3	protein_coding;lncRNA	-;+	bidirectional	0.588440282	0	1
ENSG00000069399.15	+	BCL3	protein_coding	chr19	44744705	34	0.32316024	expressed	low	0	0.495195623	1.370970733	0	FALSE	NA	NA	NA	NA	NA	none	16.37380251	0	1
ENSG00000069424.15	+	KCNAB2	protein_coding	chr1	5987927	44	0.946388137	expressed	low	0	3.496048875	5.388933419	0	FALSE	NA	NA	NA	NA	NA	none	3.931427535	0	1
ENSG00000069431.11	-	ABCC9	protein_coding	chr12	21939530	2	0.073061947	expressed	low	0	0.019509012	0.191952635	0	FALSE	NA	NA	NA	NA	NA	none	0.956086074	1	0
ENSG00000069482.7	+	GAL	protein_coding	chr11	68680779	18	16.0086827	expressed	low	0	13.4274364	43.95581545	0	FALSE	NA	NA	NA	NA	NA	none	33.08211076	0	1
ENSG00000069493.15	+	CLEC2D	protein_coding	chr12	9661969	3	3.334852057	expressed	low	0	3.272651656	8.58988043	0	FALSE	NA	NA	NA	NA	NA	none	6.265304634	0	0
ENSG00000069509.6	-	FUNDC1	protein_coding	chrX	44539860	23	15.91728554	expressed	low	0	6.986817189	13.28493765	0	FALSE	NA	NA	NA	NA	NA	none	6.311700704	0	1
ENSG00000069535.14	-	MAOB	protein_coding	chrX	43879451	0	0	off	low	0	0	0	0	FALSE	NA	NA	NA	NA	NA	none	1.083053344	1	0
ENSG00000069667.16	-	RORA	protein_coding	chr15	61226303	0	0.114529226	expressed	low	0	0	0.0621089	0	FALSE	NA	NA	NA	NA	NA	none	0.481357042	1	0
ENSG00000069696.7	+	DRD4	protein_coding	chr11	634269	0	0.124822627	expressed	low	0	0.986761575	8.044005391	0	FALSE	NA	NA	NA	NA	NA	none	23.73645159	0	0
ENSG00000069702.11	-	TGFBR3	protein_coding	chr1	91903336	8	6.899401347	expressed	low	0	2.700758703	8.43304738	0	FALSE	NA	NA	NA	NA	NA	none	4.620323048	0	1
ENSG00000069764.9	-	PLA2G10	protein_coding	chr16	14691670	0	0.081034521	expressed	low	0	0.005570622	0.047988159	0	FALSE	NA	NA	NA	NA	NA	none	0.481357042	0	0
ENSG00000069812.11	-	HES2	protein_coding	chr1	6421671	22	0.065270965	expressed	low	0	0.402486718	0.523638449	0	FALSE	2	ENSG00000069812.11;ENSG00000187017.17	HES2;ESPN	protein_coding;protein_coding	-;+	bidirectional	0	1	0
ENSG00000069849.11	+	ATP1B3	protein_coding	chr3	141873124	39	46.56135414	expressed	low	0	21.26257362	46.24389743	0	FALSE	NA	NA	NA	NA	NA	none	40.50337685	0	1
ENSG00000069869.16	-	NEDD4	protein_coding	chr15	55990747	34	13.73787613	expressed	low	0	4.517814065	8.62229347	0	FALSE	NA	NA	NA	NA	NA	none	48.17194947	0	1
ENSG00000069943.10	+	PIGB	protein_coding	chr15	55315960	64	4.742244139	expressed	low	0	29.88578893	45.73271536	0	FALSE	NA	NA	NA	NA	NA	none	1.785204877	0	1
ENSG00000069956.12	+	MAPK6	protein_coding	chr15	51949106	1	51.70974855	expressed	low	0	18.96852848	35.63828927	0	FALSE	NA	NA	NA	NA	NA	none	13.12464248	0	0
ENSG00000069966.18	-	GNB5	protein_coding	chr15	52188370	1	0.066171971	expressed	low	0	0.026297289	0.080709084	0	FALSE	NA	NA	NA	NA	NA	none	0.481357042	1	0
ENSG00000069974.16	-	RAB27A	protein_coding	chr15	55316114	64	12.43084977	expressed	low	0	29.82783145	45.73271536	0	FALSE	2	ENSG00000069974.16;ENSG00000225973.4	RAB27A;PIGBOS1	protein_coding;protein_coding	-;-	nearby_same_strand	0	0	1
ENSG00000069998.12	-	HDHD5	protein_coding	chr22	17162288	2	7.122240507	expressed	low	0	0.116626382	0.231042394	0	FALSE	NA	NA	NA	NA	NA	none	0.715407553	1	0
ENSG00000070010.19	-	UFD1	protein_coding	chr22	19476203	69	33.53032193	expressed	low	0	94.076163	171.2074903	0	TRUE	2	ENSG00000070010.19;ENSG00000093009.10	UFD1;CDC45	protein_coding;protein_coding	-;+	bidirectional	2.72140692	0	1
ENSG00000070018.9	-	LRP6	protein_coding	chr12	12264045	0	7.906181243	expressed	low	0	1.521103591	4.222957977	0	FALSE	NA	NA	NA	NA	NA	none	30.70950069	0	1
ENSG00000070019.5	-	GUCY2C	protein_coding	chr12	14693600	0	0.011176256	expressed	low	0	0.017198742	0.124217801	0	FALSE	NA	NA	NA	NA	NA	none	0	0	0
ENSG00000070031.4	-	SCT	protein_coding	chr11	624182	0	0.178097683	expressed	low	0	0.689968202	6.74939438	0	FALSE	NA	NA	NA	NA	NA	none	0.949458064	0	1
ENSG00000070047.12	+	PHRF1	protein_coding	chr11	573470	0	12.35053009	expressed	low	0	6.263390268	7.834680125	0	FALSE	NA	NA	NA	NA	NA	none	25.13205648	0	1
ENSG00000070061.15	-	ELP1	protein_coding	chr9	108931125	35	27.92561709	expressed	low	0	14.62041017	18.31010972	0	FALSE	2	ENSG00000070061.15;ENSG00000119328.12	ELP1;ABITRAM	protein_coding;protein_coding	-;+	bidirectional	1.069797324	0	1
ENSG00000070081.17	+	NUCB2	protein_coding	chr11	17205153	42	14.81049841	expressed	low	0	1.451145254	5.518638265	0	FALSE	2	ENSG00000011405.13;ENSG00000070081.17	PIK3C2A;NUCB2	protein_coding;protein_coding	-;+	bidirectional	0.12033926	0	1
ENSG00000070087.14	-	PFN2	protein_coding	chr3	150047789	10	0.140664953	expressed	low	0	0.273417843	2.194902743	0	FALSE	NA	NA	NA	NA	NA	none	4.379644527	1	0
ENSG00000070159.14	-	PTPN3	protein_coding	chr9	109495314	1	0	off	low	0	0	0.0621089	0	FALSE	NA	NA	NA	NA	NA	none	0.601696302	1	0
ENSG00000070182.21	-	SPTB	protein_coding	chr14	64876908	20	7.301552883	expressed	low	0	1.029170322	2.783313212	0	FALSE	NA	NA	NA	NA	NA	none	17.31000455	0	1
ENSG00000070190.13	+	DAPP1	protein_coding	chr4	99813827	5	2.269491046	expressed	low	0	0.169327253	0.434762302	0	FALSE	NA	NA	NA	NA	NA	none	0.835746813	0	0
ENSG00000070193.4	-	FGF10	protein_coding	chr5	44386707	0	0	off	low	0	0	0	0	FALSE	NA	NA	NA	NA	NA	none	0	0	0
ENSG00000070214.16	+	SLC44A1	protein_coding	chr9	105241622	31	0.254777699	expressed	low	0	0.086409993	0.186326701	0	FALSE	NA	NA	NA	NA	NA	none	3.964567585	1	0
ENSG00000070269.14	+	TMEM260	protein_coding	chr14	56485354	0	2.21791273	expressed	low	0	0	0.047988159	0	FALSE	NA	NA	NA	NA	NA	none	0	0	0
ENSG00000070366.14	-	SMG6	protein_coding	chr17	2300786	25	2.605577551	expressed	low	0	6.721152603	7.887830332	0	FALSE	NA	NA	NA	NA	NA	none	3.771320214	0	1
ENSG00000070367.16	-	EXOC5	protein_coding	chr14	57265906	50	7.72535724	expressed	low	0	10.50856345	17.94929362	0	FALSE	2	ENSG00000070367.16;ENSG00000053770.12	EXOC5;AP5M1	protein_coding;protein_coding	-;+	bidirectional	0	0	1
ENSG00000070371.16	-	CLTCL1	protein_coding	chr22	19288720	44	3.226616277	expressed	low	0	0.967630792	1.470644155	0	FALSE	2	ENSG00000070371.16;ENSG00000287146.1	CLTCL1;AC000085.1	protein_coding;lncRNA	-;+	bidirectional	1.076425334	1	1
ENSG00000070388.11	+	FGF22	protein_coding	chr19	636879	19	0.202331277	expressed	low	0	0.849295642	1.265511446	0	FALSE	NA	NA	NA	NA	NA	none	21.32759622	0	1
ENSG00000070404.10	+	FSTL3	protein_coding	chr19	673392	5	3.521713264	expressed	low	0	2.604611065	4.143066322	0	FALSE	NA	NA	NA	NA	NA	none	77.76629184	0	0
ENSG00000070413.20	-	DGCR2	protein_coding	chr22	19119455	36	44.28733113	expressed	low	0	17.44679812	33.95028054	0	FALSE	NA	NA	NA	NA	NA	none	1.410931075	1	1
ENSG00000070423.18	-	RNF126	protein_coding	chr19	660234	31	11.23558646	expressed	low	0	6.71504609	10.97643545	0	FALSE	2	ENSG00000070423.18;ENSG00000267666.2	RNF126;AC004156.1	protein_coding;lncRNA	-;+	bidirectional	2.039139418	0	1
ENSG00000070444.15	-	MNT	protein_coding	chr17	2398105	61	1.061514431	expressed	low	0	1.616040119	2.557387714	0	TRUE	NA	NA	NA	NA	NA	none	101.3242047	0	1
ENSG00000070476.15	-	ZXDC	protein_coding	chr3	126472892	23	3.589985054	expressed	low	0	2.980527777	5.595829837	0	FALSE	NA	NA	NA	NA	NA	none	29.43775782	0	1
ENSG00000070495.14	-	JMJD6	protein_coding	chr17	76723800	58	10.03840813	expressed	low	0	37.21732472	50.94614748	0	FALSE	2	ENSG00000070495.14;ENSG00000181038.13	JMJD6;METTL23	protein_coding;protein_coding	-;+	bidirectional	0.361017781	0	1
ENSG00000070501.12	+	POLB	protein_coding	chr8	42335454	36	15.35544777	expressed	low	0	9.726558996	15.45218714	0	FALSE	NA	NA	NA	NA	NA	none	59.09734521	0	1
ENSG00000070526.15	-	ST6GALNAC1	protein_coding	chr17	76640787	82	28.09184099	expressed	low	0	10.19607609	18.57141747	0	TRUE	NA	NA	NA	NA	NA	none	16.98419698	0	1
ENSG00000070540.13	-	WIPI1	protein_coding	chr17	68454514	31	6.583263802	expressed	low	0	1.956920725	3.043336112	0	FALSE	NA	NA	NA	NA	NA	none	7.98982234	0	1
ENSG00000070601.10	+	FRMPD1	protein_coding	chr9	37647954	4	0.008470243	expressed	low	0	0	0	0	FALSE	NA	NA	NA	NA	NA	none	0.481357042	1	0
ENSG00000070610.14	-	GBA2	protein_coding	chr9	35746229	19	14.82633113	expressed	low	0	23.15752497	33.53880614	0	FALSE	2	ENSG00000070610.14;ENSG00000107185.10	GBA2;RGP1	protein_coding;protein_coding	-;+	bidirectional	0.12033926	0	1
ENSG00000070614.15	+	NDST1	protein_coding	chr5	150482818	38	5.914376893	expressed	low	0	1.285241707	2.901733379	0	FALSE	NA	NA	NA	NA	NA	none	0.12033926	0	1
ENSG00000070669.17	-	ASNS	protein_coding	chr7	97869543	38	3.051274084	expressed	low	0	29.10622764	53.74673788	0	FALSE	NA	NA	NA	NA	NA	none	30.68505881	0	1
ENSG00000070718.12	+	AP3M2	protein_coding	chr8	42149946	43	7.812898325	expressed	low	0	5.359069772	10.70135942	0	FALSE	2	ENSG00000261449.1;ENSG00000070718.12	AC103724.3;AP3M2	lncRNA;protein_coding	-;+	bidirectional	0	0	1
ENSG00000070729.14	-	CNGB1	protein_coding	chr16	57968129	5	0	off	low	0	0	0.026364822	0	FALSE	NA	NA	NA	NA	NA	none	0.12033926	0	0
ENSG00000070731.11	-	ST6GALNAC2	protein_coding	chr17	76583957	4	0.008341863	expressed	low	0	0.038899161	0.161418168	0	FALSE	NA	NA	NA	NA	NA	none	0.240678521	1	0
ENSG00000070748.18	+	CHAT	protein_coding	chr10	49606095	4	0.005812645	expressed	low	0	0	0	0	FALSE	NA	NA	NA	NA	NA	none	0	1	0
ENSG00000070756.16	-	PABPC1	protein_coding	chr8	100719810	56	63.57500179	expressed	low	0	153.3830741	515.4620177	0	FALSE	NA	NA	NA	NA	NA	none	183.7516227	0	1
ENSG00000070759.17	-	TESK2	protein_coding	chr1	45488164	24	4.139325252	expressed	low	0	1.898998016	2.824817947	0	FALSE	2	ENSG00000288208.1;ENSG00000070759.17	AL451136.1;TESK2	protein_coding;protein_coding	-;-	nearby_same_strand	0	0	1
ENSG00000070761.8	-	CFAP20	protein_coding	chr16	58126382	54	31.0391189	expressed	low	0	13.20961946	23.96002705	0	FALSE	2	ENSG00000070761.8;ENSG00000260927.2	CFAP20;AC009107.2	protein_coding;lncRNA	-;+	bidirectional	0	0	1
ENSG00000070770.9	-	CSNK2A2	protein_coding	chr16	58195107	12	5.141775077	expressed	low	0	8.526916812	18.96663478	0	FALSE	NA	NA	NA	NA	NA	none	0.234050511	0	1
ENSG00000070778.13	-	PTPN21	protein_coding	chr14	88552008	17	0.327232616	expressed	low	0	0.545752105	1.103727653	0	FALSE	NA	NA	NA	NA	NA	none	3.817716284	0	0
ENSG00000070785.17	-	EIF2B3	protein_coding	chr1	44983723	43	61.88977182	expressed	low	0	13.92861653	26.36432042	0	FALSE	NA	NA	NA	NA	NA	none	47.76453562	0	1
ENSG00000070808.16	-	CAMK2A	protein_coding	chr5	150287292	36	0.05253811	expressed	low	0	0	0.026364822	0	FALSE	NA	NA	NA	NA	NA	none	4.091534855	1	1
ENSG00000070814.20	+	TCOF1	protein_coding	chr5	150354629	24	14.73874057	expressed	low	0	9.791536827	16.80833416	0	FALSE	NA	NA	NA	NA	NA	none	38.22915184	1	1
ENSG00000070831.17	+	CDC42	protein_coding	chr1	22022511	73	40.25347262	expressed	low	0	5.638170027	8.109998842	0	FALSE	2	ENSG00000218510.8;ENSG00000070831.17	LINC00339;CDC42	lncRNA;protein_coding	+;+	nearby_same_strand	0	0	1
ENSG00000070882.13	-	OSBPL3	protein_coding	chr7	24978635	34	16.13463815	expressed	low	0	4.567650854	10.2389735	0	FALSE	NA	NA	NA	NA	NA	none	86.03656076	0	1
ENSG00000070886.12	+	EPHA8	protein_coding	chr1	22560489	0	0.004608442	expressed	low	0	0	0	0	FALSE	NA	NA	NA	NA	NA	none	0.240678521	1	0
ENSG00000070915.9	+	SLC12A3	protein_coding	chr16	56862207	3	0	off	low	0	0	0.0621089	0	FALSE	NA	NA	NA	NA	NA	none	1.203392604	1	0
ENSG00000070950.10	-	RAD18	protein_coding	chr3	8960774	27	13.78258089	expressed	low	0	4.704542621	8.62229347	0	FALSE	NA	NA	NA	NA	NA	none	20.11861069	0	1
ENSG00000070961.15	-	ATP2B1	protein_coding	chr12	89706301	48	17.78679305	expressed	low	0	2.949956695	9.700080154	0	FALSE	NA	NA	NA	NA	NA	none	0	0	1
ENSG00000070985.13	-	TRPM5	protein_coding	chr11	2420046	8	0.051971561	expressed	low	0	0	0.047988159	0	FALSE	NA	NA	NA	NA	NA	none	0.956086074	1	0
ENSG00000071051.14	+	NCK2	protein_coding	chr2	105741912	15	12.7315349	expressed	low	0	2.307293866	4.270946135	0	FALSE	NA	NA	NA	NA	NA	none	23.77414949	0	0
ENSG00000071054.16	+	MAP4K4	protein_coding	chr2	101693850	27	19.2925051	expressed	low	0	12.87967413	16.86609476	0	FALSE	NA	NA	NA	NA	NA	none	24.93114602	0	1
ENSG00000071073.13	-	MGAT4A	protein_coding	chr2	98728133	4	0.081288431	expressed	low	0	0	0.026903028	0	FALSE	NA	NA	NA	NA	NA	none	1.317103855	1	0
ENSG00000071082.11	+	RPL31	protein_coding	chr2	100999229	61	227.5390855	expressed	low	0	751.1379707	990.5688691	0	FALSE	NA	NA	NA	NA	NA	none	0	0	1
ENSG00000071127.17	-	WDR1	protein_coding	chr4	10113950	44	31.33898577	expressed	low	0	26.70542662	34.15989514	0	FALSE	NA	NA	NA	NA	NA	none	83.5680533	0	1
ENSG00000071189.21	-	SNX13	protein_coding	chr7	17937502	46	5.342891608	expressed	low	0	4.681024296	9.117750177	0	FALSE	2	ENSG00000071189.21;ENSG00000279048.1	SNX13;AC080080.1	protein_coding;TEC	-;+	bidirectional	32.15916474	0	1
ENSG00000071203.9	+	MS4A12	protein_coding	chr11	60489778	1	0	off	low	0	0.443217561	0.931633504	0	FALSE	NA	NA	NA	NA	NA	none	0.715407553	1	0
ENSG00000071205.12	+	ARHGAP10	protein_coding	chr4	147729063	0	0.019447344	expressed	low	0	0	0.186326701	0	FALSE	NA	NA	NA	NA	NA	none	0.962714084	1	0
ENSG00000071242.12	-	RPS6KA2	protein_coding	chr6	166903452	1	0.216506843	expressed	low	0	0.27321097	0.726381758	0	FALSE	NA	NA	NA	NA	NA	none	0.601696302	1	0
ENSG00000071243.16	+	ING3	protein_coding	chr7	120947763	56	14.91313904	expressed	low	0	15.2214259	28.98484793	0	FALSE	NA	NA	NA	NA	NA	none	26.29568103	0	1
ENSG00000071246.11	+	VASH1	protein_coding	chr14	76758468	6	0.136180743	expressed	low	0	0.212959375	0.349739365	0	FALSE	2	ENSG00000258569.1;ENSG00000071246.11	AC007376.2;VASH1	lncRNA;protein_coding	-;+	bidirectional	0	1	0
ENSG00000071282.12	+	LMCD1	protein_coding	chr3	8498807	8	0.015929521	expressed	low	0	0	0.0621089	0	FALSE	NA	NA	NA	NA	NA	none	0.722035563	1	0
ENSG00000071462.11	+	BUD23	protein_coding	chr7	73680025	43	19.42101903	expressed	low	0	28.0248431	36.09344104	0	FALSE	NA	NA	NA	NA	NA	none	0.595068292	0	1
ENSG00000071537.14	-	SEL1L	protein_coding	chr14	81530854	24	12.88874338	expressed	low	0	2.397322347	7.390176459	0	FALSE	NA	NA	NA	NA	NA	none	14.08735656	0	1
ENSG00000071539.14	+	TRIP13	protein_coding	chr5	889884	37	30.55465538	expressed	low	0	36.34259597	49.90981413	0	FALSE	2	ENSG00000028310.18;ENSG00000071539.14	BRD9;TRIP13	protein_coding;protein_coding	-;+	bidirectional	0	0	1
ENSG00000071553.17	+	ATP6AP1	protein_coding	chrX	154425645	30	21.39846721	expressed	low	0	17.50382259	26.83104491	0	FALSE	2	ENSG00000197180.2;ENSG00000071553.17	AC244090.1;ATP6AP1	lncRNA;protein_coding	-;+	bidirectional	1.430815105	0	1
ENSG00000071564.16	-	TCF3	protein_coding	chr19	1649616	64	21.54060186	expressed	low	0	7.96988854	22.03357998	0	FALSE	NA	NA	NA	NA	NA	none	56.97763459	0	1
ENSG00000071575.11	+	TRIB2	protein_coding	chr2	12713889	38	13.40812209	expressed	low	0	17.64903798	27.5776036	0	FALSE	2	ENSG00000286427.1;ENSG00000071575.11	AC009486.2;TRIB2	lncRNA;protein_coding	-;+	bidirectional	1.297219825	0	1
ENSG00000071626.16	+	DAZAP1	protein_coding	chr19	1404569	43	32.73135479	expressed	low	0	23.81186222	40.00480273	0	FALSE	NA	NA	NA	NA	NA	none	120.9328761	0	1
ENSG00000071655.18	-	MBD3	protein_coding	chr19	1589866	34	14.63369904	expressed	low	0	27.7558501	42.94940215	0	FALSE	NA	NA	NA	NA	NA	none	271.7513095	0	1
ENSG00000071677.1	+	PRLH	protein_coding	chr2	237563574	3	0	off	low	0	0	0	0	FALSE	NA	NA	NA	NA	NA	none	0	1	0
ENSG00000071794.16	-	HLTF	protein_coding	chr3	149083555	63	40.81920678	expressed	low	0	11.00901239	33.16266719	0	FALSE	NA	NA	NA	NA	NA	none	0	0	1
ENSG00000071859.15	+	FAM50A	protein_coding	chrX	154441141	8	26.92025827	expressed	low	0	89.92097078	258.3109162	0	FALSE	NA	NA	NA	NA	NA	none	85.01771736	0	1
ENSG00000071889.16	-	FAM3A	protein_coding	chrX	154513243	42	12.5921387	expressed	low	0	13.93469002	21.4082353	0	FALSE	NA	NA	NA	NA	NA	none	17.4170878	0	1
ENSG00000071894.17	-	CPSF1	protein_coding	chr8	144406336	1	25.81685659	expressed	low	0	17.17221553	22.30463924	0	FALSE	2	ENSG00000071894.17;ENSG00000272115.1	CPSF1;AC233992.3	protein_coding;lncRNA	-;+	bidirectional	1.671493626	0	1
ENSG00000071909.18	+	MYO3B	protein_coding	chr2	170175145	1	5.626377519	expressed	low	0	0	0.026903028	0	FALSE	NA	NA	NA	NA	NA	none	0	0	0
ENSG00000071967.12	+	CYBRD1	protein_coding	chr2	171519247	45	6.64570547	expressed	low	0	5.063751016	7.959040126	0	FALSE	NA	NA	NA	NA	NA	none	39.36067142	0	1
ENSG00000071991.9	-	CDH19	protein_coding	chr18	66601139	0	0	off	low	0	0	0.026364822	0	FALSE	NA	NA	NA	NA	NA	none	0	0	0
ENSG00000071994.11	-	PDCD2	protein_coding	chr6	170581693	28	55.17006482	expressed	low	0	169.3021731	219.3295902	0	FALSE	NA	NA	NA	NA	NA	none	78.27209076	0	1
ENSG00000072041.17	-	SLC6A15	protein_coding	chr12	84910616	0	0	off	low	0	0	0	0	FALSE	NA	NA	NA	NA	NA	none	0.601696302	0	0
ENSG00000072042.13	-	RDH11	protein_coding	chr14	67692794	28	25.51547918	expressed	low	0	17.43074787	23.96346185	0	FALSE	NA	NA	NA	NA	NA	none	13.49228827	0	1
ENSG00000072062.14	-	PRKACA	protein_coding	chr19	14115085	0	1.358242789	expressed	low	0	53.29967103	71.33309574	0	FALSE	2	ENSG00000072062.14;ENSG00000267783.1	PRKACA;AC022098.3	protein_coding;lncRNA	-;+	bidirectional	0.481357042	0	1
ENSG00000072071.16	-	ADGRL1	protein_coding	chr19	14203188	0	3.457790411	expressed	low	0	1.193729292	6.671950959	0	FALSE	NA	NA	NA	NA	NA	none	26.52206845	0	1
ENSG00000072080.11	+	SPP2	protein_coding	chr2	234047679	0	0	off	low	0	0	0.057760598	0	FALSE	NA	NA	NA	NA	NA	none	0.354389771	0	0
ENSG00000072110.13	-	ACTN1	protein_coding	chr14	68976441	32	8.466956534	expressed	low	0	12.0404551	45.15317049	0	FALSE	2	ENSG00000072110.13;ENSG00000259062.2	ACTN1;ACTN1-AS1	protein_coding;lncRNA	-;+	bidirectional	0.949458064	0	1
ENSG00000072121.16	-	ZFYVE26	protein_coding	chr14	67813591	33	1.860591414	expressed	low	0	1.011820044	3.503135594	0	FALSE	NA	NA	NA	NA	NA	none	1.925428167	0	1
ENSG00000072133.11	-	RPS6KA6	protein_coding	chrX	84185200	0	0	off	low	0	0	0	0	FALSE	NA	NA	NA	NA	NA	none	0.354389771	0	0
ENSG00000072134.15	+	EPN2	protein_coding	chr17	19212615	0	1.140751468	expressed	low	0	0.226609246	1.119240018	0	FALSE	NA	NA	NA	NA	NA	none	6.110790243	0	0
ENSG00000072135.13	+	PTPN18	protein_coding	chr2	130353045	26	5.54942458	expressed	low	0	6.451212159	9.130008337	0	FALSE	NA	NA	NA	NA	NA	none	84.19626164	0	1
ENSG00000072163.19	-	LIMS2	protein_coding	chr2	127678787	1	0	off	low	0	0.052998747	0.248435601	0	FALSE	NA	NA	NA	NA	NA	none	0.595068292	1	0
ENSG00000072182.12	+	ASIC4	protein_coding	chr2	219511170	52	7.868827219	expressed	low	0	10.53519738	14.92320024	0	FALSE	NA	NA	NA	NA	NA	none	8.230500861	0	1
ENSG00000072195.15	+	SPEG	protein_coding	chr2	219431843	3	0.384763547	expressed	low	0	0	0.124217801	0	FALSE	NA	NA	NA	NA	NA	none	0.361017781	0	0
ENSG00000072201.14	-	LNX1	protein_coding	chr4	53698406	2	2.578221624	expressed	low	0	0.42626308	1.391656606	0	FALSE	NA	NA	NA	NA	NA	none	0.240678521	1	0
ENSG00000072210.19	+	ALDH3A2	protein_coding	chr17	19645136	8	0.006110455	expressed	low	0	0.024323654	0.082906668	0	FALSE	NA	NA	NA	NA	NA	none	0.240678521	1	0
ENSG00000072274.13	-	TFRC	protein_coding	chr3	196079097	68	252.132354	expressed	low	0	39.26197917	77.51773457	0	FALSE	NA	NA	NA	NA	NA	none	242.9898088	0	1
ENSG00000072310.17	-	SREBF1	protein_coding	chr17	17834012	70	12.78861434	expressed	low	0	7.909402071	10.19624764	0	TRUE	NA	NA	NA	NA	NA	none	108.8546242	0	1
ENSG00000072315.3	-	TRPC5	protein_coding	chrX	112079777	0	0.065842112	expressed	low	0	0	0	0	FALSE	NA	NA	NA	NA	NA	none	0.361017781	1	0
ENSG00000072364.13	-	AFF4	protein_coding	chr5	132960635	61	7.056033452	expressed	low	0	4.336351094	5.306026751	0	FALSE	2	ENSG00000072364.13;ENSG00000272023.1	AFF4;AC010240.3	protein_coding;lncRNA	-;+	bidirectional	0.361017781	0	1
ENSG00000072401.15	+	UBE2D1	protein_coding	chr10	58331979	17	3.068543939	expressed	low	0	3.674758223	5.589342221	0	FALSE	NA	NA	NA	NA	NA	none	44.32668606	0	0
ENSG00000072415.9	+	MPP5	protein_coding	chr14	67238342	27	4.108659332	expressed	low	0	1.025054112	2.543372418	0	FALSE	NA	NA	NA	NA	NA	none	17.55068308	0	1
ENSG00000072422.17	-	RHOBTB1	protein_coding	chr10	60998441	18	4.293006836	expressed	low	0	0	0.165813336	0	FALSE	NA	NA	NA	NA	NA	none	0.722035563	1	0
ENSG00000072501.17	-	SMC1A	protein_coding	chrX	53419729	37	21.03378161	expressed	low	0	10.78218865	20.85157606	0	FALSE	NA	NA	NA	NA	NA	none	0	0	1
ENSG00000072506.12	-	HSD17B10	protein_coding	chrX	53431374	22	120.5660963	expressed	low	0	97.59481797	130.3292821	0	FALSE	NA	NA	NA	NA	NA	none	0.240678521	0	1
ENSG00000072518.20	+	MARK2	protein_coding	chr11	63835928	27	4.716424943	expressed	low	0	2.56287692	7.118501885	0	FALSE	NA	NA	NA	NA	NA	none	39.68647899	0	1
ENSG00000072571.20	+	HMMR	protein_coding	chr5	163457203	73	62.76716969	expressed	low	0	34.61872035	63.92022756	0	TRUE	2	ENSG00000170584.11;ENSG00000072571.20	NUDCD2;HMMR	protein_coding;protein_coding	-;+	bidirectional	0	0	1
ENSG00000072609.17	-	CHFR	protein_coding	chr12	132953305	7	3.282794533	expressed	low	0	0.283479753	0.726381758	0	FALSE	2	ENSG00000072609.17;ENSG00000196458.11	CHFR;ZNF605	protein_coding;protein_coding	-;-	nearby_same_strand	0	0	0
ENSG00000072657.9	+	TRHDE	protein_coding	chr12	72084266	0	0.094952916	expressed	low	0	0	0.041453334	0	FALSE	NA	NA	NA	NA	NA	none	0.240678521	0	0
ENSG00000072682.18	-	P4HA2	protein_coding	chr5	132292316	50	4.388595397	expressed	low	0	10.58675423	27.74334057	0	TRUE	NA	NA	NA	NA	NA	none	1.544526356	0	1
ENSG00000072694.20	+	FCGR2B	protein_coding	chr1	161660147	16	2.769793181	expressed	low	0	3.835844326	8.136265933	0	FALSE	NA	NA	NA	NA	NA	none	0.722035563	0	0
ENSG00000072736.19	+	NFATC3	protein_coding	chr16	68081751	61	11.61442834	expressed	low	0	10.66656786	14.18427413	0	TRUE	NA	NA	NA	NA	NA	none	95.38118486	0	1
ENSG00000072756.17	+	TRNT1	protein_coding	chr3	3123933	44	12.48555406	expressed	low	0	10.40252473	22.38480036	0	FALSE	2	ENSG00000091181.19;ENSG00000072756.17	IL5RA;TRNT1	protein_coding;protein_coding	-;+	bidirectional	0.962714084	0	1
ENSG00000072778.20	+	ACADVL	protein_coding	chr17	7214125	31	61.4071581	expressed	low	0	11.56415908	25.99571429	0	FALSE	NA	NA	NA	NA	NA	none	10.19569709	0	1
ENSG00000072786.13	-	STK10	protein_coding	chr5	172185225	30	1.168064791	expressed	low	0	0.850876278	1.699586694	0	FALSE	NA	NA	NA	NA	NA	none	15.57119575	0	0
ENSG00000072803.17	-	FBXW11	protein_coding	chr5	172003874	43	15.65805744	expressed	low	0	3.450657208	6.574377759	0	FALSE	NA	NA	NA	NA	NA	none	31.89860219	0	1
ENSG00000072818.12	+	ACAP1	protein_coding	chr17	7333529	0	1.511969243	expressed	low	0	1.0901072	1.616680026	0	FALSE	NA	NA	NA	NA	NA	none	3.777948224	0	1
ENSG00000072832.15	-	CRMP1	protein_coding	chr4	5890087	3	0.081163326	expressed	low	0	0	0	0	FALSE	NA	NA	NA	NA	NA	none	0.842374823	0	0
ENSG00000072840.13	+	EVC	protein_coding	chr4	5708201	5	0.839884795	expressed	low	0	0.362538921	1.007751335	0	FALSE	2	ENSG00000173040.13;ENSG00000072840.13	EVC2;EVC	protein_coding;protein_coding	-;+	bidirectional	0.829118803	1	1
ENSG00000072849.11	-	DERL2	protein_coding	chr17	5483812	48	5.267674346	expressed	low	0	32.79164149	48.89993384	0	FALSE	NA	NA	NA	NA	NA	none	1.664865616	0	1
ENSG00000072858.10	+	SIDT1	protein_coding	chr3	113529296	0	0.003106982	expressed	low	0	0	0.047988159	0	FALSE	NA	NA	NA	NA	NA	none	1.444071125	1	0
ENSG00000072864.15	+	NDE1	protein_coding	chr16	15640267	0	8.463836706	expressed	low	0	1.501075154	3.983017183	0	FALSE	3	ENSG00000166783.22;ENSG00000072864.15;ENSG00000283736.1	MARF1;NDE1;MIR484	protein_coding;protein_coding;miRNA	-;+;+	multiple_nearby_promoters	0	0	1
ENSG00000072952.18	-	MRVI1	protein_coding	chr11	10690989	0	0.052759677	expressed	low	0	0	0.011141244	0	FALSE	NA	NA	NA	NA	NA	none	0.722035563	1	0
ENSG00000072954.7	+	TMEM38A	protein_coding	chr19	16658139	43	0.464224359	expressed	low	0	16.9716588	30.13657381	0	FALSE	3	ENSG00000268790.5;ENSG00000214046.8;ENSG00000072954.7	AC008764.4;SMIM7;TMEM38A	protein_coding;protein_coding;protein_coding	-;-;+	multiple_nearby_promoters	0.702151533	0	1
ENSG00000072958.8	+	AP1M1	protein_coding	chr19	16194578	49	3.223576176	expressed	low	0	3.515989615	5.694801508	0	FALSE	NA	NA	NA	NA	NA	none	0.12033926	0	1
ENSG00000073008.15	+	PVR	protein_coding	chr19	44640798	19	5.422063568	expressed	low	0	1.924888616	3.167218483	0	FALSE	NA	NA	NA	NA	NA	none	11.91462186	0	1
ENSG00000073050.11	-	XRCC1	protein_coding	chr19	43577474	6	8.444997857	expressed	low	0	0.78822946	1.318248375	0	FALSE	NA	NA	NA	NA	NA	none	2.874886231	0	0
ENSG00000073060.16	-	SCARB1	protein_coding	chr12	124879669	49	11.70461148	expressed	low	0	0.350537123	0.646192128	0	FALSE	NA	NA	NA	NA	NA	none	3.590293783	0	1
ENSG00000073067.14	+	CYP2W1	protein_coding	chr7	980181	4	0.0245923	expressed	low	0	0.019022136	0.0621089	0	FALSE	NA	NA	NA	NA	NA	none	2.981969471	1	0
ENSG00000073111.14	+	MCM2	protein_coding	chr3	127595410	39	56.01094037	expressed	low	0	20.59986087	45.73271536	0	FALSE	2	ENSG00000163870.16;ENSG00000073111.14	TPRA1;MCM2	protein_coding;protein_coding	-;+	bidirectional	0.354389771	0	1
ENSG00000073146.16	+	MOV10L1	protein_coding	chr22	50086879	9	0.392762816	expressed	low	0	0	0.047988159	0	FALSE	NA	NA	NA	NA	NA	none	0.240678521	0	0
ENSG00000073150.14	+	PANX2	protein_coding	chr22	50167731	35	0.460624048	expressed	low	0	1.383138606	2.663399778	0	FALSE	NA	NA	NA	NA	NA	none	13.65239559	0	0
ENSG00000073169.14	+	SELENOO	protein_coding	chr22	50197979	16	8.814997915	expressed	low	0	23.6254471	52.17598234	0	FALSE	2	ENSG00000273253.2;ENSG00000073169.14	AL022328.4;SELENOO	lncRNA;protein_coding	-;+	bidirectional	0	0	1
ENSG00000073282.13	+	TP63	protein_coding	chr3	189628389	0	0.204342579	expressed	low	0	1.292667456	3.119230324	0	FALSE	NA	NA	NA	NA	NA	none	1.651609596	0	0
ENSG00000073331.18	+	ALPK1	protein_coding	chr4	112282509	23	2.066827336	expressed	low	0	1.574152003	5.098760081	0	FALSE	NA	NA	NA	NA	NA	none	0	0	1
ENSG00000073350.13	+	LLGL2	protein_coding	chr17	75522080	22	4.672619396	expressed	low	0	22.21906529	33.32848053	0	FALSE	NA	NA	NA	NA	NA	none	84.09580641	0	1
ENSG00000073417.15	+	PDE8A	protein_coding	chr15	84977440	54	6.299231639	expressed	low	0	3.487636351	5.461314697	0	FALSE	NA	NA	NA	NA	NA	none	66.00411421	0	1
ENSG00000073464.12	+	CLCN4	protein_coding	chrX	10153945	22	0.068515547	expressed	low	0	0.050897107	0.115521197	0	FALSE	NA	NA	NA	NA	NA	none	0.722035563	0	1
ENSG00000073536.18	-	NLE1	protein_coding	chr17	35139305	31	15.27588115	expressed	low	0	10.01174203	19.31725364	0	FALSE	NA	NA	NA	NA	NA	none	42.90353405	0	1
ENSG00000073578.17	+	SDHA	protein_coding	chr5	215241	25	8.972019735	expressed	low	0	16.35107708	19.63860349	0	FALSE	4	ENSG00000164366.4;ENSG00000260774.1;ENSG00000073578.17;ENSG00000286001.1	CCDC127;AC021087.3;SDHA;AC021087.5	protein_coding;lncRNA;protein_coding;protein_coding	-;-;+;+	multiple_nearby_promoters	0	0	1
ENSG00000073584.20	-	SMARCE1	protein_coding	chr17	40645655	36	1.768637442	expressed	low	0	18.36065412	22.71642703	0	FALSE	NA	NA	NA	NA	NA	none	0.354389771	0	1
ENSG00000073598.6	+	FNDC8	protein_coding	chr17	35118615	36	0.069289483	expressed	low	0	3.582397455	4.846804041	0	FALSE	3	ENSG00000267618.5;ENSG00000185379.20;ENSG00000073598.6	AC004223.3;RAD51D;FNDC8	protein_coding;protein_coding;protein_coding	-;-;+	multiple_nearby_promoters	0	1	1
ENSG00000073605.18	-	GSDMB	protein_coding	chr17	39916855	5	1.239622553	expressed	low	0	34.00435039	54.22661947	0	FALSE	NA	NA	NA	NA	NA	none	31.87209015	0	0
ENSG00000073614.13	-	KDM5A	protein_coding	chr12	386321	0	12.36621472	expressed	low	0	4.215908197	15.40419898	0	FALSE	NA	NA	NA	NA	NA	none	0.240678521	0	1
ENSG00000073670.14	+	ADAM11	protein_coding	chr17	44755988	5	0.11206364	expressed	low	0	0.088342701	0.310544501	0	FALSE	NA	NA	NA	NA	NA	none	5.863483712	1	0
ENSG00000073711.11	+	PPP2R3A	protein_coding	chr3	135962728	4	0.196166632	expressed	low	0	0.066450261	0.143964476	0	FALSE	NA	NA	NA	NA	NA	none	2.266561918	0	0
ENSG00000073712.15	-	FERMT2	protein_coding	chr14	52949436	7	1.15657375	expressed	low	0	0.839103187	1.801158107	0	FALSE	NA	NA	NA	NA	NA	none	0	1	0
ENSG00000073734.10	-	ABCB11	protein_coding	chr2	169028325	13	0.389163548	expressed	low	0	0.013451514	0.239940794	0	FALSE	NA	NA	NA	NA	NA	none	0.240678521	0	0
ENSG00000073737.16	+	DHRS9	protein_coding	chr2	169061789	6	0.564672173	expressed	low	0	0.051781117	0.158188931	0	FALSE	NA	NA	NA	NA	NA	none	0.601696302	0	0
ENSG00000073754.6	-	CD5L	protein_coding	chr1	157895257	0	0	off	low	0	0	0	0	FALSE	NA	NA	NA	NA	NA	none	0	0	0
ENSG00000073756.12	-	PTGS2	protein_coding	chr1	186677424	1	0.020700301	expressed	low	0	0.019509012	0.082906668	0	FALSE	2	ENSG00000073756.12;ENSG00000273129.1	PTGS2;PACERR	protein_coding;lncRNA	-;+	bidirectional	0	0	0
ENSG00000073792.15	-	IGF2BP2	protein_coding	chr3	185822057	38	12.34412762	expressed	low	0	11.1976078	14.15650685	0	FALSE	NA	NA	NA	NA	NA	none	96.72583583	0	1
ENSG00000073803.14	+	MAP3K13	protein_coding	chr3	185279941	16	0.5263484	expressed	low	0	0	0.026903028	0	FALSE	2	ENSG00000113790.11;ENSG00000073803.14	EHHADH;MAP3K13	protein_coding;protein_coding	-;+	bidirectional	0	0	0
ENSG00000073849.15	+	ST6GAL1	protein_coding	chr3	186927502	52	18.24230624	expressed	low	0	12.07340633	14.71593357	0	FALSE	NA	NA	NA	NA	NA	none	46.48926999	0	1
ENSG00000073861.3	+	TBX21	protein_coding	chr17	47730236	1	0	off	low	0	0	0.0621089	0	FALSE	NA	NA	NA	NA	NA	none	1.183508574	1	0
ENSG00000073910.22	+	FRY	protein_coding	chr13	31843713	0	0.024329638	expressed	low	0	0	0.0621089	0	FALSE	2	ENSG00000287904.1;ENSG00000073910.22	AL138708.1;FRY	lncRNA;protein_coding	-;+	bidirectional	0	0	0
ENSG00000073921.18	-	PICALM	protein_coding	chr11	86066883	74	89.82928663	expressed	low	0	40.33102813	50.04704798	0	FALSE	NA	NA	NA	NA	NA	none	45.35878549	0	1
ENSG00000073969.18	+	NSF	protein_coding	chr17	46587669	0	20.3066526	expressed	low	0	2.966433687	4.67638841	0	FALSE	NA	NA	NA	NA	NA	none	10.76425334	0	0
ENSG00000074047.21	+	GLI2	protein_coding	chr2	120732623	1	0	off	low	0	0	0	0	FALSE	NA	NA	NA	NA	NA	none	0.715407553	1	0
ENSG00000074054.18	-	CLASP1	protein_coding	chr2	121646588	61	10.89587211	expressed	low	0	17.94916926	29.03283609	0	FALSE	NA	NA	NA	NA	NA	none	2.025883398	0	1
ENSG00000074071.14	-	MRPS34	protein_coding	chr16	1770156	40	84.69448994	expressed	low	0	139.8292677	255.8216907	0	FALSE	NA	NA	NA	NA	NA	none	9.313554205	0	1
ENSG00000074181.9	-	NOTCH3	protein_coding	chr19	15197996	1	0.059054696	expressed	low	0	0	0.026364822	0	FALSE	NA	NA	NA	NA	NA	none	0.595068292	1	0
ENSG00000074201.9	-	CLNS1A	protein_coding	chr11	77634795	49	77.64244165	expressed	low	0	30.65080374	57.53722758	0	FALSE	NA	NA	NA	NA	NA	none	35.66329439	0	1
ENSG00000074211.14	-	PPP2R2C	protein_coding	chr4	6560601	3	0.020350589	expressed	low	0	0	0.026903028	0	FALSE	NA	NA	NA	NA	NA	none	1.083053344	1	0
ENSG00000074219.13	-	TEAD2	protein_coding	chr19	49359458	35	5.770241005	expressed	low	0	3.261569276	6.037544192	0	FALSE	NA	NA	NA	NA	NA	none	0.601696302	0	1
ENSG00000074266.21	+	EED	protein_coding	chr11	86241753	44	12.17998379	expressed	low	0	17.26054812	28.88029925	0	FALSE	NA	NA	NA	NA	NA	none	24.92555309	0	1
ENSG00000074276.10	+	CDHR2	protein_coding	chr5	176539511	47	0.301424573	expressed	low	0	2.009931775	4.462898771	0	FALSE	NA	NA	NA	NA	NA	none	72.18221963	0	1
ENSG00000074317.11	-	SNCB	protein_coding	chr5	176627557	2	0.012471252	expressed	low	0	0	0.0621089	0	FALSE	3	ENSG00000074317.11;ENSG00000266329.1;ENSG00000175766.13	SNCB;MIR4281;EIF4E1B	protein_coding;miRNA;protein_coding	-;-;+	multiple_nearby_promoters	0	1	0
ENSG00000074319.13	-	TSG101	protein_coding	chr11	18523952	39	17.1197463	expressed	low	0	8.706871524	13.96455422	0	FALSE	NA	NA	NA	NA	NA	none	50.23863601	0	1
ENSG00000074356.17	-	NCBP3	protein_coding	chr17	3843247	14	4.571687139	expressed	low	0	4.909031591	29.40014463	0	FALSE	NA	NA	NA	NA	NA	none	44.1400667	0	1
ENSG00000074370.18	-	ATP2A3	protein_coding	chr17	3961465	34	16.42693674	expressed	low	0	11.23954974	17.97122275	0	FALSE	NA	NA	NA	NA	NA	none	62.17521206	0	1
ENSG00000074410.14	-	CA12	protein_coding	chr15	63378847	3	0.185688552	expressed	low	0	0.258875142	0.807415703	0	FALSE	NA	NA	NA	NA	NA	none	0.601696302	1	0
ENSG00000074416.14	-	MGLL	protein_coding	chr3	128049191	25	0.023718301	expressed	low	0	13.25851134	23.6581623	0	FALSE	NA	NA	NA	NA	NA	none	0.481357042	0	1
ENSG00000074527.12	-	NTN4	protein_coding	chr12	95788153	0	0	off	low	0	0	0	0	FALSE	NA	NA	NA	NA	NA	none	0.361017781	1	0
ENSG00000074582.14	+	BCS1L	protein_coding	chr2	218655764	28	15.11055976	expressed	low	0	23.67343554	37.02454363	0	FALSE	NA	NA	NA	NA	NA	none	3.329731233	0	1
ENSG00000074590.13	-	NUAK1	protein_coding	chr12	106137034	0	0	off	low	0	0	0	0	FALSE	NA	NA	NA	NA	NA	none	3.971195595	1	0
ENSG00000074603.19	-	DPP8	protein_coding	chr15	65514705	52	6.971697877	expressed	low	0	4.329211712	10.17348967	0	FALSE	NA	NA	NA	NA	NA	none	45.65808102	0	1
ENSG00000074621.14	+	SLC24A1	protein_coding	chr15	65608366	61	1.668081315	expressed	low	0	12.50010582	17.3365591	0	FALSE	2	ENSG00000138614.15;ENSG00000074621.14	INTS14;SLC24A1	protein_coding;protein_coding	-;+	bidirectional	0	0	1
ENSG00000074657.13	+	ZNF532	protein_coding	chr18	58859600	1	0	off	low	0	0	0	0	FALSE	NA	NA	NA	NA	NA	none	1.805088907	0	0
ENSG00000074660.16	-	SCARF1	protein_coding	chr17	1642745	0	0.842402964	expressed	low	0	35.74288865	69.81040389	0	FALSE	NA	NA	NA	NA	NA	none	24.6241874	0	1
ENSG00000074695.6	-	LMAN1	protein_coding	chr18	59356266	35	53.76027451	expressed	low	0	18.45795702	34.79141515	0	FALSE	2	ENSG00000074695.6;ENSG00000267677.1	LMAN1;AC016229.2	protein_coding;lncRNA	-;+	bidirectional	1.069797324	0	1
ENSG00000074696.13	+	HACD3	protein_coding	chr15	65527418	36	41.1898822	expressed	low	0	15.78745901	31.91212562	0	FALSE	NA	NA	NA	NA	NA	none	41.42632287	0	1
ENSG00000074706.13	-	IPCEF1	protein_coding	chr6	154353793	17	0.007716811	expressed	low	0	0.04103552	0.143964476	0	FALSE	NA	NA	NA	NA	NA	none	0.829118803	1	0
ENSG00000074755.15	-	ZZEF1	protein_coding	chr17	4140031	44	3.84776876	expressed	low	0	3.533086812	6.425266769	0	FALSE	2	ENSG00000074755.15;ENSG00000167740.9	ZZEF1;CYB5D2	protein_coding;protein_coding	-;+	bidirectional	0.829118803	0	1
ENSG00000074771.4	-	NOX3	protein_coding	chr6	155452840	0	0	off	low	0	0	0	0	FALSE	NA	NA	NA	NA	NA	none	0.481357042	0	0
ENSG00000074800.16	-	ENO1	protein_coding	chr1	8876191	80	783.9871148	expressed	low	0	305.582019	423.8463301	0	TRUE	NA	NA	NA	NA	NA	none	3.436814473	0	1
ENSG00000074803.19	+	SLC12A1	protein_coding	chr15	48175438	4	0	off	low	0	0.074532723	0.496871202	0	FALSE	3	ENSG00000104177.18;ENSG00000233932.6;ENSG00000074803.19	MYEF2;CTXN2;SLC12A1	protein_coding;protein_coding;protein_coding	-;+;+	multiple_nearby_promoters	0	0	0
ENSG00000074842.7	-	MYDGF	protein_coding	chr19	4667371	34	39.70355142	expressed	low	0	20.63402084	25.60024197	0	FALSE	NA	NA	NA	NA	NA	none	27.03097261	0	1
ENSG00000074855.11	-	ANO8	protein_coding	chr19	17331856	89	1.73662273	expressed	low	0	18.88225969	24.66473373	0	FALSE	2	ENSG00000074855.11;ENSG00000130299.17	ANO8;GTPBP3	protein_coding;protein_coding	-;+	bidirectional	0	0	1
ENSG00000074935.14	-	TUBE1	protein_coding	chr6	112084530	28	8.736679231	expressed	low	0	7.740997649	16.41195032	0	FALSE	2	ENSG00000074935.14;ENSG00000203778.8	TUBE1;FAM229B	protein_coding;protein_coding	-;+	bidirectional	0	0	1
ENSG00000074964.17	+	ARHGEF10L	protein_coding	chr1	17536698	1	0.011777644	expressed	low	0	0	0.011141244	0	FALSE	NA	NA	NA	NA	NA	none	1.083053344	1	0
ENSG00000074966.11	-	TXK	protein_coding	chr4	48131251	0	1.430352259	expressed	low	0	12.17024591	22.2665057	0	FALSE	NA	NA	NA	NA	NA	none	5.449441851	0	0
ENSG00000075035.10	+	WSCD2	protein_coding	chr12	108126288	34	2.106873547	expressed	low	0	1.332772659	2.48720004	0	FALSE	NA	NA	NA	NA	NA	none	15.684907	0	0
ENSG00000075043.18	-	KCNQ2	protein_coding	chr20	63469678	3	0.003666512	expressed	low	0	0	0	0	FALSE	NA	NA	NA	NA	NA	none	4.452552636	1	0
ENSG00000075073.15	-	TACR2	protein_coding	chr10	69413919	2	0.208390137	expressed	low	0	0.039816336	0.095976318	0	FALSE	NA	NA	NA	NA	NA	none	0.601696302	1	0
ENSG00000075089.9	+	ACTR6	protein_coding	chr12	100196122	53	20.66910802	expressed	low	0	11.13006667	17.46982406	0	FALSE	NA	NA	NA	NA	NA	none	16.61448103	0	1
ENSG00000075131.10	-	TIPIN	protein_coding	chr15	66383747	43	19.56207318	expressed	low	0	15.79445569	27.57635171	0	FALSE	2	ENSG00000075131.10;ENSG00000169032.9	TIPIN;MAP2K1	protein_coding;protein_coding	-;+	bidirectional	0	0	1
ENSG00000075142.13	-	SRI	protein_coding	chr7	88223994	2	26.40071242	expressed	low	0	0.442724114	1.739049207	0	FALSE	NA	NA	NA	NA	NA	none	0.240678521	0	0
ENSG00000075151.20	-	EIF4G3	protein_coding	chr1	21173889	40	6.643990225	expressed	low	0	7.734335772	16.51845923	0	FALSE	2	ENSG00000075151.20;ENSG00000287192.1	EIF4G3;AL031005.2	protein_coding;lncRNA	-;+	bidirectional	0.234050511	0	1
ENSG00000075188.9	-	NUP37	protein_coding	chr12	102117121	40	41.84607608	expressed	low	0	41.8844266	60.51306828	0	FALSE	2	ENSG00000075188.9;ENSG00000185480.11	NUP37;PARPBP	protein_coding;protein_coding	-;+	bidirectional	0.12033926	0	1
ENSG00000075213.11	-	SEMA3A	protein_coding	chr7	84489725	0	1.018675741	expressed	low	0	0.617965959	2.831301371	0	FALSE	NA	NA	NA	NA	NA	none	0.12033926	0	0
ENSG00000075218.19	+	GTSE1	protein_coding	chr22	46293870	29	4.216569028	expressed	low	0	4.879706274	5.758579059	0	FALSE	2	ENSG00000277232.2;ENSG00000075218.19	GTSE1-DT;GTSE1	lncRNA;protein_coding	-;+	bidirectional	0.240678521	0	1
ENSG00000075223.14	-	SEMA3C	protein_coding	chr7	80919360	4	0.079827782	expressed	low	0	0	0	0	FALSE	NA	NA	NA	NA	NA	none	0.12033926	0	0
ENSG00000075234.17	+	TTC38	protein_coding	chr22	46264961	28	10.20053267	expressed	low	0	3.181543065	6.425266769	0	FALSE	NA	NA	NA	NA	NA	none	30.38928604	0	1
ENSG00000075239.14	+	ACAT1	protein_coding	chr11	108113695	2	24.12912262	expressed	low	0	0.448082183	0.704706678	0	FALSE	NA	NA	NA	NA	NA	none	12.07472919	0	0
ENSG00000075240.17	+	GRAMD4	protein_coding	chr22	46573012	9	15.75611915	expressed	low	0	1.916114636	3.901993626	0	FALSE	NA	NA	NA	NA	NA	none	20.4852214	0	1
ENSG00000075275.16	-	CELSR1	protein_coding	chr22	46534171	1	0.013870389	expressed	low	0	0.011141244	0.0621089	0	FALSE	NA	NA	NA	NA	NA	none	0.601696302	1	0
ENSG00000075290.8	+	WNT8B	protein_coding	chr10	100460009	1	0.043693741	expressed	low	0	0.026633925	0.124217801	0	FALSE	NA	NA	NA	NA	NA	none	0.240678521	1	0
ENSG00000075292.19	+	ZNF638	protein_coding	chr2	71273561	9	25.43645929	expressed	low	0	0.071408992	0.191952635	0	FALSE	NA	NA	NA	NA	NA	none	0.588440282	1	0
ENSG00000075303.13	-	SLC25A40	protein_coding	chr7	87873361	60	9.484070759	expressed	low	0	22.89485254	57.24705424	0	FALSE	NA	NA	NA	NA	NA	none	0.354389771	0	1
ENSG00000075336.12	+	TIMM21	protein_coding	chr18	74145523	35	9.980436932	expressed	low	0	18.35967904	28.97588046	0	FALSE	2	ENSG00000141665.13;ENSG00000075336.12	FBXO15;TIMM21	protein_coding;protein_coding	-;+	bidirectional	1.203392604	0	1
ENSG00000075340.23	-	ADD2	protein_coding	chr2	70765226	18	6.227330385	expressed	low	0	3.065698096	4.043241894	0	FALSE	NA	NA	NA	NA	NA	none	8.350840121	0	1
ENSG00000075388.4	-	FGF4	protein_coding	chr11	69772342	0	0	off	low	0	0	0	0	FALSE	NA	NA	NA	NA	NA	none	0.240678521	1	0
ENSG00000075391.16	+	RASAL2	protein_coding	chr1	178091141	16	0.186844939	expressed	low	0	0.345702818	0.719822382	0	FALSE	2	ENSG00000224687.2;ENSG00000075391.16	RASAL2-AS1;RASAL2	lncRNA;protein_coding	-;+	bidirectional	0	1	0
ENSG00000075399.14	-	VPS9D1	protein_coding	chr16	89717899	67	2.216466891	expressed	low	0	20.00246054	66.54481022	0	FALSE	NA	NA	NA	NA	NA	none	19.75096489	0	1
ENSG00000075407.18	+	ZNF37A	protein_coding	chr10	38091334	17	4.56375947	expressed	low	0	7.964209853	12.12711088	0	FALSE	2	ENSG00000075407.18;ENSG00000283930.1	ZNF37A;AL117339.5	protein_coding;protein_coding	+;+	nearby_same_strand	0	0	1
ENSG00000075413.18	+	MARK3	protein_coding	chr14	103382392	23	13.16365647	expressed	low	0	15.31015954	24.66377556	0	FALSE	NA	NA	NA	NA	NA	none	35.22833342	0	1
ENSG00000075415.12	+	SLC25A3	protein_coding	chr12	98590591	51	100.9492687	expressed	low	0	143.5565636	279.1882044	0	FALSE	NA	NA	NA	NA	NA	none	76.82035655	0	1
ENSG00000075420.13	+	FNDC3B	protein_coding	chr3	172036578	53	7.871191327	expressed	low	0	2.344413625	13.91656606	0	FALSE	NA	NA	NA	NA	NA	none	64.88232788	0	1
ENSG00000075426.12	+	FOSL2	protein_coding	chr2	28389448	35	0.740776744	expressed	low	0	1.494192299	1.699586694	0	FALSE	NA	NA	NA	NA	NA	none	4.272561286	1	1
ENSG00000075429.8	+	CACNG5	protein_coding	chr17	66832117	3	0	off	low	0	0	0	0	FALSE	NA	NA	NA	NA	NA	none	0.240678521	1	0
ENSG00000075461.6	+	CACNG4	protein_coding	chr17	66961707	0	0	off	low	0	0	0.024229992	0	FALSE	NA	NA	NA	NA	NA	none	0.601696302	1	0
ENSG00000075539.14	-	FRYL	protein_coding	chr4	48777323	39	9.117292524	expressed	low	0	1.778224482	6.670354077	0	FALSE	NA	NA	NA	NA	NA	none	31.69106372	0	1
ENSG00000075568.17	-	TMEM131	protein_coding	chr2	97992949	36	2.888374782	expressed	low	0	2.342489553	5.325694003	0	FALSE	NA	NA	NA	NA	NA	none	33.86379842	0	1
ENSG00000075618.18	+	FSCN1	protein_coding	chr7	5589816	56	67.26441387	expressed	low	0	130.2332449	331.9720719	0	FALSE	NA	NA	NA	NA	NA	none	177.7162283	0	1
ENSG00000075624.16	-	ACTB	protein_coding	chr7	5560785	41	375.746957	expressed	low	0	0.889215374	3.321967547	0	TRUE	NA	NA	NA	NA	NA	none	3.690749014	0	1
ENSG00000075643.6	+	MOCOS	protein_coding	chr18	36184497	33	8.740076421	expressed	low	0	7.645088054	13.12867769	0	FALSE	2	ENSG00000260552.1;ENSG00000075643.6	AC023043.1;MOCOS	lncRNA;protein_coding	-;+	bidirectional	0	0	1
ENSG00000075651.16	-	PLD1	protein_coding	chr3	171807951	75	6.28133803	expressed	low	0	3.024600266	5.230709312	0	FALSE	NA	NA	NA	NA	NA	none	35.77141271	0	1
ENSG00000075673.11	+	ATP12A	protein_coding	chr13	24677411	1	0	off	low	0	0	0.012114996	0	FALSE	NA	NA	NA	NA	NA	none	0.240678521	1	1
ENSG00000075702.18	+	WDR62	protein_coding	chr19	36051881	49	5.374970654	expressed	low	0	3.46751886	5.457518112	0	FALSE	2	ENSG00000161277.11;ENSG00000075702.18	THAP8;WDR62	protein_coding;protein_coding	-;+	bidirectional	0.240678521	0	1
ENSG00000075711.21	-	DLG1	protein_coding	chr3	197296331	43	7.700884615	expressed	low	0	9.430200265	15.40419898	0	FALSE	NA	NA	NA	NA	NA	none	0.234050511	0	1
ENSG00000075785.12	+	RAB7A	protein_coding	chr3	128723122	41	8.938570193	expressed	low	0	15.63530205	33.22826164	0	FALSE	NA	NA	NA	NA	NA	none	26.53635955	0	1
ENSG00000075790.10	+	BCAP29	protein_coding	chr7	107576977	0	13.68439374	expressed	low	0	20.94312988	31.62419667	0	FALSE	NA	NA	NA	NA	NA	none	0.12033926	0	1
ENSG00000075826.17	-	SEC31B	protein_coding	chr10	100516865	4	0.915886283	expressed	low	0	2.25266208	2.653013375	0	FALSE	NA	NA	NA	NA	NA	none	23.82924373	0	0
ENSG00000075856.12	-	SART3	protein_coding	chr12	108558401	57	25.65686079	expressed	low	0	42.22412264	61.283995	0	TRUE	2	ENSG00000075856.12;ENSG00000136003.15	SART3;ISCU	protein_coding;protein_coding	-;+	bidirectional	5.24190338	0	1
ENSG00000075884.14	+	ARHGAP15	protein_coding	chr2	143088362	0	3.479972881	expressed	low	0	0.026364822	0.173281795	0	FALSE	NA	NA	NA	NA	NA	none	2.159478678	0	0
ENSG00000075886.11	+	TUBA3D	protein_coding	chr2	131473119	3	0.482349266	expressed	low	0	1.623859274	2.900130398	0	FALSE	NA	NA	NA	NA	NA	none	7.655316599	0	0
ENSG00000075891.21	+	PAX2	protein_coding	chr10	100732603	0	0	off	low	0	0	0	0	FALSE	NA	NA	NA	NA	NA	none	0.12033926	1	0
ENSG00000075914.13	+	EXOSC7	protein_coding	chr3	44972241	34	27.68216585	expressed	low	0	25.91592029	32.29603089	0	FALSE	NA	NA	NA	NA	NA	none	2.855002201	0	1
ENSG00000075945.13	-	KIFAP3	protein_coding	chr1	170082209	2	12.09679762	expressed	low	0	0.030163379	0.095976318	0	FALSE	NA	NA	NA	NA	NA	none	0.361017781	0	0
ENSG00000075975.16	+	MKRN2	protein_coding	chr3	12554087	58	39.61429068	expressed	low	0	6.448275689	13.43633978	0	FALSE	NA	NA	NA	NA	NA	none	63.17458897	0	1
ENSG00000076003.5	-	MCM6	protein_coding	chr2	135873444	30	60.20041204	expressed	low	0	11.21847169	16.71529702	0	FALSE	NA	NA	NA	NA	NA	none	32.01231344	0	1
ENSG00000076043.10	+	REXO2	protein_coding	chr11	114436386	35	53.32497157	expressed	low	0	59.4216837	77.64209457	0	FALSE	NA	NA	NA	NA	NA	none	41.10507315	0	1
ENSG00000076053.10	+	RBM7	protein_coding	chr11	114397030	60	3.263553751	expressed	low	0	28.0675953	37.32630231	0	FALSE	3	ENSG00000180425.11;ENSG00000076053.10;ENSG00000255663.1	C11orf71;RBM7;AP002373.1	protein_coding;protein_coding;protein_coding	-;+;+	multiple_nearby_promoters	0	0	1
ENSG00000076067.13	+	RBMS2	protein_coding	chr12	56518820	12	0.142966818	expressed	low	0	0.055783327	0.210918574	0	FALSE	NA	NA	NA	NA	NA	none	0.12033926	0	0
ENSG00000076108.11	-	BAZ2A	protein_coding	chr12	56633817	53	7.583685398	expressed	low	0	433.4300728	772.5005973	0	FALSE	NA	NA	NA	NA	NA	none	136.6683195	0	1
ENSG00000076201.15	+	PTPN23	protein_coding	chr3	47378011	56	2.253438245	expressed	low	0	6.09929679	12.88061346	0	FALSE	2	ENSG00000260236.1;ENSG00000076201.15	AC099778.1;PTPN23	lncRNA;protein_coding	-;+	bidirectional	0	0	1
ENSG00000076242.14	+	MLH1	protein_coding	chr3	36990332	0	70.05646117	expressed	low	0	73.89844098	91.03353729	0	TRUE	2	ENSG00000178567.8;ENSG00000076242.14	EPM2AIP1;MLH1	protein_coding;protein_coding	-;+	bidirectional	0.12033926	0	1
ENSG00000076248.10	+	UNG	protein_coding	chr12	109094574	24	37.61862783	expressed	low	0	15.0672945	30.30238715	0	FALSE	NA	NA	NA	NA	NA	none	33.83065837	0	1
ENSG00000076258.10	+	FMO4	protein_coding	chr1	171311183	15	0.432380135	expressed	low	0	0.156774524	0.479881588	0	FALSE	NA	NA	NA	NA	NA	none	0.240678521	0	0
ENSG00000076321.11	+	KLHL20	protein_coding	chr1	173711941	56	12.55014058	expressed	low	0	3.161828855	9.7895844	0	FALSE	NA	NA	NA	NA	NA	none	24.81184184	0	1
ENSG00000076344.16	-	RGS11	protein_coding	chr16	272981	5	0.004543022	expressed	low	0	0	0.079094465	0	FALSE	NA	NA	NA	NA	NA	none	3.369499292	1	0
ENSG00000076351.13	-	SLC46A1	protein_coding	chr17	28404198	11	0.411579124	expressed	low	0	2.002596472	2.943186713	0	FALSE	NA	NA	NA	NA	NA	none	0.835746813	0	1
ENSG00000076356.7	-	PLXNA2	protein_coding	chr1	208241385	10	0.149729812	expressed	low	0	0.152626185	0.421837149	0	FALSE	NA	NA	NA	NA	NA	none	3.242532022	1	0
ENSG00000076382.17	-	SPAG5	protein_coding	chr17	28596026	45	53.9024627	expressed	low	0	28.3730273	40.23390132	0	FALSE	NA	NA	NA	NA	NA	none	0	0	1
ENSG00000076513.17	+	ANKRD13A	protein_coding	chr12	109996186	51	17.59297726	expressed	low	0	8.070140439	12.47692129	0	FALSE	2	ENSG00000280426.1;ENSG00000076513.17	AC084876.2;ANKRD13A	TEC;protein_coding	-;+	bidirectional	29.71157639	0	1
ENSG00000076554.15	-	TPD52	protein_coding	chr8	80228233	3	0.016351026	expressed	low	0	0.267249087	0.621089003	0	FALSE	NA	NA	NA	NA	NA	none	2.005999368	0	0
ENSG00000076555.15	+	ACACB	protein_coding	chr12	109113595	3	0.591392838	expressed	low	0	0.203312266	0.82906668	0	FALSE	NA	NA	NA	NA	NA	none	1.551154366	0	0
ENSG00000076604.15	+	TRAF4	protein_coding	chr17	28741005	55	23.35831562	expressed	low	0	27.4409931	34.62419712	0	FALSE	2	ENSG00000265073.1;ENSG00000076604.15	AC010761.2;TRAF4	lncRNA;protein_coding	-;+	bidirectional	0	0	1
ENSG00000076641.4	-	PAG1	protein_coding	chr8	81109069	2	0.034582894	expressed	low	0	0.013182411	0.095976318	0	FALSE	NA	NA	NA	NA	NA	none	0.595068292	1	0
ENSG00000076650.7	+	GPATCH1	protein_coding	chr19	33077899	43	4.269012968	expressed	low	0	0.749295794	2.015502671	0	FALSE	NA	NA	NA	NA	NA	none	16.34729047	0	1
ENSG00000076662.10	-	ICAM3	protein_coding	chr19	10336662	3	0.090656749	expressed	low	0	0.192100185	0.455986674	0	FALSE	NA	NA	NA	NA	NA	none	6.545751215	0	0
ENSG00000076685.18	-	NT5C2	protein_coding	chr10	103190307	42	8.091773662	expressed	low	0	4.664395973	5.326799556	0	FALSE	NA	NA	NA	NA	NA	none	31.57072446	0	1
ENSG00000076706.17	-	MCAM	protein_coding	chr11	119318522	56	16.06554728	expressed	low	0	1.076953903	1.393224526	0	FALSE	NA	NA	NA	NA	NA	none	47.85939792	0	1
ENSG00000076716.9	-	GPC4	protein_coding	chrX	133412490	0	0.018236444	expressed	low	0	0	0	0	FALSE	NA	NA	NA	NA	NA	none	0.601696302	1	0
ENSG00000076770.14	-	MBNL3	protein_coding	chrX	132486969	0	0.237450163	expressed	low	0	0	0.047988159	0	FALSE	NA	NA	NA	NA	NA	none	0.481357042	1	0
ENSG00000076826.9	+	CAMSAP3	protein_coding	chr19	7592902	4	0.181675863	expressed	low	0	0.037681506	0.095976318	0	FALSE	NA	NA	NA	NA	NA	none	0.956086074	1	0
ENSG00000076864.19	-	RAP1GAP	protein_coding	chr1	21666364	52	4.643973582	expressed	low	0	2.064204712	4.270946135	0	TRUE	NA	NA	NA	NA	NA	none	91.02556468	0	1
ENSG00000076924.12	-	XAB2	protein_coding	chr19	7626546	28	4.739165769	expressed	low	0	41.85281587	55.46456088	0	FALSE	3	ENSG00000076924.12;ENSG00000229833.10;ENSG00000268400.5	XAB2;PET100;AC008763.2	protein_coding;protein_coding;protein_coding	-;+;+	multiple_nearby_promoters	0.12033926	0	1
ENSG00000076928.17	+	ARHGEF1	protein_coding	chr19	41880161	57	13.23270567	expressed	low	0	7.642898665	13.97450256	0	FALSE	NA	NA	NA	NA	NA	none	64.63398627	0	1
ENSG00000076944.16	+	STXBP2	protein_coding	chr19	7633881	43	6.73889545	expressed	low	0	25.43039391	36.27159775	0	FALSE	NA	NA	NA	NA	NA	none	0	0	1
ENSG00000076984.17	+	MAP2K7	protein_coding	chr19	7900843	35	6.496157828	expressed	low	0	9.031445555	19.00903652	0	FALSE	2	ENSG00000214248.2;ENSG00000076984.17	AC010336.1;MAP2K7	lncRNA;protein_coding	-;+	bidirectional	1.905544137	0	1
ENSG00000077009.13	+	NMRK2	protein_coding	chr19	3930103	3	0	off	low	0	0.101656133	0.288802992	0	FALSE	NA	NA	NA	NA	NA	none	1.310475845	1	0
ENSG00000077044.10	+	DGKD	protein_coding	chr2	233351507	0	4.641674346	expressed	low	0	1.786654361	4.435506737	0	FALSE	2	ENSG00000259793.1;ENSG00000077044.10	AC013726.1;DGKD	lncRNA;protein_coding	-;+	bidirectional	0.601696302	0	1
ENSG00000077063.11	-	CTTNBP2	protein_coding	chr7	117871140	0	0.006721149	expressed	low	0	0	0.107612112	0	FALSE	NA	NA	NA	NA	NA	none	0.240678521	1	0
ENSG00000077080.10	-	ACTL6B	protein_coding	chr7	100653449	15	0.152246676	expressed	low	0	0.178917774	0.455986674	0	FALSE	NA	NA	NA	NA	NA	none	10.47055074	1	0
ENSG00000077092.19	+	RARB	protein_coding	chr3	25171332	1	1.048317955	expressed	low	0	0	0.041453334	0	FALSE	NA	NA	NA	NA	NA	none	0.240678521	0	0
ENSG00000077097.15	-	TOP2B	protein_coding	chr3	25661908	40	124.5218423	expressed	low	0	19.2810071	39.96101397	0	FALSE	2	ENSG00000077097.15;ENSG00000283971.1	TOP2B;MIR4442	protein_coding;miRNA	-;-	nearby_same_strand	56.78894507	0	1
ENSG00000077147.16	-	TM9SF3	protein_coding	chr10	96584453	31	24.6853988	expressed	low	0	5.861972886	10.89331205	0	FALSE	NA	NA	NA	NA	NA	none	52.63113012	0	1
ENSG00000077150.20	+	NFKB2	protein_coding	chr10	102391110	33	2.837455629	expressed	low	0	5.26918742	40.12234956	0	FALSE	NA	NA	NA	NA	NA	none	7.655316599	0	1
ENSG00000077152.11	-	UBE2T	protein_coding	chr1	202338981	46	64.00929896	expressed	low	0	8.335974756	32.45444259	0	FALSE	NA	NA	NA	NA	NA	none	25.56805254	0	1
ENSG00000077157.22	+	PPP1R12B	protein_coding	chr1	202345699	45	2.515886951	expressed	low	0	1.937419868	4.558875088	0	FALSE	NA	NA	NA	NA	NA	none	24.17700549	0	1
ENSG00000077232.18	+	DNAJC10	protein_coding	chr2	182713041	41	10.84062448	expressed	low	0	18.44966167	36.08709544	0	FALSE	NA	NA	NA	NA	NA	none	36.12373232	0	1
ENSG00000077235.18	-	GTF3C1	protein_coding	chr16	27546914	45	13.13225246	expressed	low	0	4.034708907	9.492813484	0	FALSE	2	ENSG00000077235.18;ENSG00000047578.13	GTF3C1;KIAA0556	protein_coding;protein_coding	-;+	bidirectional	0.835746813	0	1
ENSG00000077238.14	+	IL4R	protein_coding	chr16	27310668	9	1.09012371	expressed	low	0	0.27952166	0.704706678	0	FALSE	NA	NA	NA	NA	NA	none	0	1	0
ENSG00000077254.14	-	USP33	protein_coding	chr1	77756853	45	33.7913414	expressed	low	0	4.419121535	14.01254238	0	FALSE	NA	NA	NA	NA	NA	none	28.23436522	0	1
ENSG00000077264.15	+	PAK3	protein_coding	chrX	110941285	0	0	off	low	0	0	0.041453334	0	FALSE	NA	NA	NA	NA	NA	none	0.601696302	1	0
ENSG00000077274.9	-	CAPN6	protein_coding	chrX	111267484	1	0.119353685	expressed	low	0	0	0.105459287	0	FALSE	NA	NA	NA	NA	NA	none	0	0	0
ENSG00000077279.18	-	DCX	protein_coding	chrX	111409430	0	0	off	low	0	0	0	0	FALSE	NA	NA	NA	NA	NA	none	0.481357042	0	0
ENSG00000077312.9	+	SNRPA	protein_coding	chr19	40747637	76	45.67118312	expressed	low	0	42.56903211	61.06092728	0	TRUE	NA	NA	NA	NA	NA	none	2.146222658	0	1
ENSG00000077327.16	+	SPAG6	protein_coding	chr10	22342445	2	3.928077338	expressed	low	0	0.186838787	0.372653402	0	FALSE	NA	NA	NA	NA	NA	none	3.684121004	0	0
ENSG00000077348.9	-	EXOSC5	protein_coding	chr19	41394360	46	28.32600327	expressed	low	0	11.55384286	17.46768981	0	FALSE	2	ENSG00000077348.9;ENSG00000248098.12	EXOSC5;BCKDHA	protein_coding;protein_coding	-;+	bidirectional	2.63420771	0	1
ENSG00000077380.15	+	DYNC1I2	protein_coding	chr2	171684409	44	43.49551956	expressed	low	0	22.31705315	36.42301255	0	FALSE	NA	NA	NA	NA	NA	none	17.89844484	0	1
ENSG00000077420.16	+	APBB1IP	protein_coding	chr10	26435341	3	0.006516334	expressed	low	0	0	0.047988159	0	FALSE	NA	NA	NA	NA	NA	none	0.12033926	1	0
ENSG00000077454.16	-	LRCH4	protein_coding	chr7	100583130	49	2.068774164	expressed	low	0	4.300183971	10.07136193	0	FALSE	NA	NA	NA	NA	NA	none	5.743144451	0	1
ENSG00000077458.13	-	FAM76B	protein_coding	chr11	95787410	60	9.132396236	expressed	low	0	20.68516103	42.32385401	0	FALSE	NA	NA	NA	NA	NA	none	0.601696302	0	1
ENSG00000077463.15	-	SIRT6	protein_coding	chr19	4179567	39	7.995797247	expressed	low	0	5.499695004	6.775759202	0	FALSE	2	ENSG00000077463.15;ENSG00000089847.12	SIRT6;ANKRD24	protein_coding;protein_coding	-;+	bidirectional	2.60106766	0	1
ENSG00000077498.9	+	TYR	protein_coding	chr11	89174875	0	0	off	low	0	0	0	0	FALSE	NA	NA	NA	NA	NA	none	0.588440282	0	0
ENSG00000077514.9	+	POLD3	protein_coding	chr11	74490851	39	12.31368825	expressed	low	0	3.481641694	6.010733429	0	FALSE	3	ENSG00000175536.7;ENSG00000254837.2;ENSG00000077514.9	LIPT2;AP001372.2;POLD3	protein_coding;lncRNA;protein_coding	-;+;+	multiple_nearby_promoters	0.12033926	0	1
ENSG00000077522.13	+	ACTN2	protein_coding	chr1	236661141	0	0.078351199	expressed	low	0	0	0.047988159	0	FALSE	NA	NA	NA	NA	NA	none	0	1	0
ENSG00000077549.18	-	CAPZB	protein_coding	chr1	19482540	31	18.93327269	expressed	low	0	8.971442597	26.81302377	0	FALSE	NA	NA	NA	NA	NA	none	3.456698503	0	1
ENSG00000077585.14	+	GPR137B	protein_coding	chr1	236139505	6	0.568492128	expressed	low	0	0.331467912	0.787613346	0	FALSE	NA	NA	NA	NA	NA	none	1.076425334	1	0
ENSG00000077616.11	+	NAALAD2	protein_coding	chr11	90128515	0	0.186333292	expressed	low	0	0.006057498	0.143964476	0	FALSE	NA	NA	NA	NA	NA	none	0.354389771	0	0
ENSG00000077684.16	+	JADE1	protein_coding	chr4	128806700	67	10.38683721	expressed	low	0	2.152673908	5.679106757	0	FALSE	NA	NA	NA	NA	NA	none	106.2249743	0	1
ENSG00000077713.19	+	SLC25A43	protein_coding	chrX	119396336	19	4.015385992	expressed	low	0	0.79748646	2.152242245	0	FALSE	NA	NA	NA	NA	NA	none	11.7137114	0	1
ENSG00000077721.16	+	UBE2A	protein_coding	chrX	119571536	38	7.782198118	expressed	low	0	14.75453848	26.49664591	0	FALSE	NA	NA	NA	NA	NA	none	28.12728197	0	1
ENSG00000077782.20	-	FGFR1	protein_coding	chr8	38465835	4	0.067275009	expressed	low	0	0.141203366	0.389943526	0	FALSE	NA	NA	NA	NA	NA	none	5.756400471	1	0
ENSG00000077800.13	+	FKBP6	protein_coding	chr7	73325161	6	0.261001433	expressed	low	0	1.478332031	2.42224711	0	FALSE	2	ENSG00000146755.11;ENSG00000077800.13	TRIM50;FKBP6	protein_coding;protein_coding	-;+	bidirectional	0	1	0
ENSG00000077935.17	-	SMC1B	protein_coding	chr22	45410620	1	0.158548844	expressed	low	0	0	0.052729644	0	FALSE	2	ENSG00000077935.17;ENSG00000128408.9	SMC1B;RIBC2	protein_coding;protein_coding	-;+	bidirectional	0	1	0
ENSG00000077942.19	+	FBLN1	protein_coding	chr22	45499238	0	0.002992096	expressed	low	0	0	0.041453334	0	FALSE	NA	NA	NA	NA	NA	none	0.240678521	1	0
ENSG00000077943.8	-	ITGA8	protein_coding	chr10	15716923	1	0.048656416	expressed	low	0	0	0.026364822	0	FALSE	NA	NA	NA	NA	NA	none	0.12033926	1	0
ENSG00000077984.6	+	CST7	protein_coding	chr20	24946269	1	0.28002936	expressed	low	0	0.1065357	0.373080006	0	FALSE	NA	NA	NA	NA	NA	none	5.034364909	0	0
ENSG00000078018.19	+	MAP2	protein_coding	chr2	209421058	1	0	off	low	0	0	0.041453334	0	FALSE	NA	NA	NA	NA	NA	none	0.842374823	0	0
ENSG00000078043.16	-	PIAS2	protein_coding	chr18	46917161	30	2.526040669	expressed	low	0	1.864824893	2.768306289	0	FALSE	NA	NA	NA	NA	NA	none	2.955457431	0	1
ENSG00000078053.17	-	AMPH	protein_coding	chr7	38628421	2	0.108736223	expressed	low	0	0	0	0	FALSE	NA	NA	NA	NA	NA	none	1.323731865	1	0
ENSG00000078061.13	+	ARAF	protein_coding	chrX	47558100	59	12.63895973	expressed	low	0	13.3061307	21.03912779	0	FALSE	NA	NA	NA	NA	NA	none	26.5837907	0	1
ENSG00000078070.13	-	MCCC1	protein_coding	chr3	183113076	7	15.07664887	expressed	low	0	0.079901775	0.290173338	0	FALSE	NA	NA	NA	NA	NA	none	0.12033926	1	0
ENSG00000078081.8	-	LAMP3	protein_coding	chr3	183160840	17	0.315751114	expressed	low	0	0.162368249	0.558980102	0	FALSE	NA	NA	NA	NA	NA	none	1.424187095	0	0
ENSG00000078098.14	-	FAP	protein_coding	chr2	162242152	1	0	off	low	0	0	0	0	FALSE	NA	NA	NA	NA	NA	none	0	0	0
ENSG00000078114.18	-	NEBL	protein_coding	chr10	21171188	27	5.188906595	expressed	low	0	5.676460033	13.53974026	0	FALSE	NA	NA	NA	NA	NA	none	0	0	1
ENSG00000078124.12	+	ACER3	protein_coding	chr11	76857867	23	3.346402283	expressed	low	0	2.045887704	4.462898771	0	FALSE	NA	NA	NA	NA	NA	none	24.74452666	0	1
ENSG00000078140.14	+	UBE2K	protein_coding	chr4	39695109	52	18.05411386	expressed	low	0	13.21424216	35.58052867	0	FALSE	NA	NA	NA	NA	NA	none	61.45007126	0	1
ENSG00000078142.13	+	PIK3C3	protein_coding	chr18	41952234	34	5.399904468	expressed	low	0	13.27723724	21.11478988	0	FALSE	NA	NA	NA	NA	NA	none	9.173330914	0	1
ENSG00000078177.14	+	N4BP2	protein_coding	chr4	40053850	73	7.575190911	expressed	low	0	2.215903463	5.134732994	0	FALSE	NA	NA	NA	NA	NA	none	93.82443756	0	1
ENSG00000078237.7	+	TIGAR	protein_coding	chr12	4304763	5	0.02479865	expressed	low	0	12.6563065	20.58692014	0	FALSE	NA	NA	NA	NA	NA	none	18.22072964	0	0
ENSG00000078246.17	+	TULP3	protein_coding	chr12	2874223	39	4.687039839	expressed	low	0	5.567409239	16.18800058	0	FALSE	3	ENSG00000111206.12;ENSG00000171792.11;ENSG00000078246.17	FOXM1;RHNO1;TULP3	protein_coding;protein_coding;protein_coding	-;+;+	multiple_nearby_promoters	0.12033926	0	1
ENSG00000078269.15	+	SYNJ2	protein_coding	chr6	157978863	52	6.302941256	expressed	low	0	2.938048424	4.462898771	0	FALSE	NA	NA	NA	NA	NA	none	43.68625678	0	1
ENSG00000078295.17	+	ADCY2	protein_coding	chr5	7393138	0	0.011878475	expressed	low	0	0	0	0	FALSE	NA	NA	NA	NA	NA	none	0.361017781	1	0
ENSG00000078304.19	+	PPP2R5C	protein_coding	chr14	101758798	43	41.16340731	expressed	low	0	43.41114234	61.66478409	0	FALSE	NA	NA	NA	NA	NA	none	87.07777589	0	1
ENSG00000078328.21	+	RBFOX1	protein_coding	chr16	5236802	0	0.070202569	expressed	low	0	0.025297407	0.124217801	0	FALSE	NA	NA	NA	NA	NA	none	1.083053344	0	0
ENSG00000078369.18	-	GNB1	protein_coding	chr1	1888118	37	26.2258286	expressed	low	0	14.1589769	25.96142208	0	FALSE	2	ENSG00000078369.18;ENSG00000231050.1	GNB1;AL109917.1	protein_coding;lncRNA	-;+	bidirectional	1.196764594	0	1
ENSG00000078399.18	-	HOXA9	protein_coding	chr7	27172181	0	0	off	low	0	0	0	0	FALSE	NA	NA	NA	NA	NA	none	0.481357042	1	0
ENSG00000078401.7	+	EDN1	protein_coding	chr6	12287361	3	0.021422523	expressed	low	0	0.026633925	0.0621089	0	FALSE	NA	NA	NA	NA	NA	none	0.12033926	1	0
ENSG00000078403.17	+	MLLT10	protein_coding	chr10	21521646	62	10.65382167	expressed	low	0	0.76666282	1.86540003	0	FALSE	NA	NA	NA	NA	NA	none	1.069797324	0	1
ENSG00000078487.17	-	ZCWPW1	protein_coding	chr7	100425993	76	1.040458444	expressed	low	0	68.36819868	85.15837441	0	TRUE	NA	NA	NA	NA	NA	none	5.128192129	0	1
ENSG00000078549.14	+	ADCYAP1R1	protein_coding	chr7	31049461	0	0.003665438	expressed	low	0	0	0	0	FALSE	NA	NA	NA	NA	NA	none	1.203392604	1	0
ENSG00000078579.9	-	FGF20	protein_coding	chr8	16999346	0	0	off	low	0	0	0.057760598	0	FALSE	NA	NA	NA	NA	NA	none	0.361017781	1	0
ENSG00000078589.13	+	P2RY10	protein_coding	chrX	78942332	0	0	off	low	0	0	0	0	FALSE	NA	NA	NA	NA	NA	none	0	0	0
ENSG00000078596.11	-	ITM2A	protein_coding	chrX	79364668	33	24.87979579	expressed	low	0	8.998230079	14.25994689	0	FALSE	NA	NA	NA	NA	NA	none	2.025883398	0	1
ENSG00000078618.21	-	NRDC	protein_coding	chr1	51875938	71	67.83650011	expressed	low	0	59.15676366	135.9563827	0	TRUE	NA	NA	NA	NA	NA	none	57.37179242	0	1
ENSG00000078668.14	+	VDAC3	protein_coding	chr8	42388624	27	95.52389343	expressed	low	0	25.26257917	50.91543651	0	FALSE	NA	NA	NA	NA	NA	none	65.94342704	0	1
ENSG00000078674.17	+	PCM1	protein_coding	chr8	17919840	48	37.49501324	expressed	low	0	12.19564659	25.99124041	0	FALSE	NA	NA	NA	NA	NA	none	26.26254098	0	1
ENSG00000078687.17	+	TNRC6C	protein_coding	chr17	77956240	37	0.88127294	expressed	low	0	1.603290485	3.606440057	0	FALSE	NA	NA	NA	NA	NA	none	114.6201403	1	1
ENSG00000078699.21	+	CBFA2T2	protein_coding	chr20	33487075	45	1.527801856	expressed	low	0	1.778781869	2.794671111	0	FALSE	NA	NA	NA	NA	NA	none	28.89674869	0	1
ENSG00000078725.13	-	BRINP1	protein_coding	chr9	119366436	3	0	off	low	0	0	0	0	FALSE	NA	NA	NA	NA	NA	none	1.564410386	0	0
ENSG00000078747.15	+	ITCH	protein_coding	chr20	34360241	20	17.81306889	expressed	low	0	2.543353538	7.544506787	0	FALSE	NA	NA	NA	NA	NA	none	44.3608612	0	1
ENSG00000078795.16	+	PKD2L2	protein_coding	chr5	137884968	39	0.392595731	expressed	low	0	2.942717953	3.730800059	0	FALSE	NA	NA	NA	NA	NA	none	1.063169314	0	1
ENSG00000078804.13	+	TP53INP2	protein_coding	chr20	34701339	38	0.786913835	expressed	low	0	0.724553102	1.616680026	0	FALSE	NA	NA	NA	NA	NA	none	15.19692195	0	1
ENSG00000078808.17	-	SDF4	protein_coding	chr1	1229068	44	36.8988462	expressed	low	0	35.94571608	57.16414758	0	FALSE	2	ENSG00000078808.17;ENSG00000176022.7	SDF4;B3GALT6	protein_coding;protein_coding	-;+	bidirectional	0.474729032	0	1
ENSG00000078814.15	+	MYH7B	protein_coding	chr20	34972403	8	0.278804694	expressed	low	0	0.101794215	0.369107505	0	FALSE	NA	NA	NA	NA	NA	none	1.905544137	0	1
ENSG00000078898.7	+	BPIFB2	protein_coding	chr20	33004704	1	0	off	low	0	0	0	0	FALSE	NA	NA	NA	NA	NA	none	0.12033926	1	0
ENSG00000078900.15	+	TP73	protein_coding	chr1	3649516	30	0.347392128	expressed	low	0	5.098276522	5.948462977	0	FALSE	NA	NA	NA	NA	NA	none	11.96101793	1	1
ENSG00000078902.16	-	TOLLIP	protein_coding	chr11	1306655	32	2.702574221	expressed	low	0	2.465906627	3.443587592	0	FALSE	2	ENSG00000078902.16;ENSG00000255153.1	TOLLIP;TOLLIP-AS1	protein_coding;lncRNA	-;+	bidirectional	0.949458064	0	1
ENSG00000078967.13	+	UBE2D4	protein_coding	chr7	43923436	45	1.934713038	expressed	low	0	3.509135617	4.116163294	0	FALSE	2	ENSG00000106608.16;ENSG00000078967.13	URGCP;UBE2D4	protein_coding;protein_coding	-;+	bidirectional	0.234050511	0	1
ENSG00000079101.16	+	CLUL1	protein_coding	chr18	593988	19	0.135654267	expressed	low	0	0.248469502	0.372653402	0	FALSE	NA	NA	NA	NA	NA	none	3.476582533	0	0
ENSG00000079102.16	-	RUNX1T1	protein_coding	chr8	92100287	0	0.003220897	expressed	low	0	0	0	0	FALSE	NA	NA	NA	NA	NA	none	0.481357042	1	0
ENSG00000079112.10	-	CDH17	protein_coding	chr8	94214304	2	0	off	low	0	0	0	0	FALSE	NA	NA	NA	NA	NA	none	0.361017781	1	0
ENSG00000079134.12	-	THOC1	protein_coding	chr18	265051	53	18.48144692	expressed	low	0	10.48604424	20.20301487	0	FALSE	2	ENSG00000079134.12;ENSG00000263884.1	THOC1;AP000845.1	protein_coding;lncRNA	-;+	bidirectional	0	0	1
ENSG00000079150.18	-	FKBP7	protein_coding	chr2	178475601	41	2.163111155	expressed	low	0	7.486846028	16.28848877	0	FALSE	2	ENSG00000079150.18;ENSG00000116095.11	FKBP7;PLEKHA3	protein_coding;protein_coding	-;+	bidirectional	1.430815105	0	1
ENSG00000079156.17	+	OSBPL6	protein_coding	chr2	178191481	25	1.810025924	expressed	low	0	1.184800161	2.639348735	0	FALSE	NA	NA	NA	NA	NA	none	35.38284781	1	1
ENSG00000079215.14	+	SLC1A3	protein_coding	chr5	36603355	1	0	off	low	0	0	0.011141244	0	FALSE	NA	NA	NA	NA	NA	none	5.174588199	1	0
ENSG00000079246.16	+	XRCC5	protein_coding	chr2	216104464	33	145.8334551	expressed	low	0	33.59513887	111.8822793	0	FALSE	NA	NA	NA	NA	NA	none	15.42434445	0	1
ENSG00000079257.8	-	LXN	protein_coding	chr3	158669649	3	1.307366618	expressed	low	0	0.183139345	3.455147435	0	FALSE	NA	NA	NA	NA	NA	none	12.04821715	0	0
ENSG00000079263.19	+	SP140	protein_coding	chr2	230200110	1	0.42113983	expressed	low	0	2.215478649	5.279256522	0	FALSE	NA	NA	NA	NA	NA	none	1.551154366	0	0
ENSG00000079277.21	-	MKNK1	protein_coding	chr1	46613844	20	5.127333088	expressed	low	0	1.735997974	3.274813385	0	FALSE	2	ENSG00000079277.21;ENSG00000142961.14	MKNK1;MOB3C	protein_coding;protein_coding	-;-	nearby_same_strand	0.12033926	0	1
ENSG00000079308.19	-	TNS1	protein_coding	chr2	218030983	3	0.058336296	expressed	low	0	0	0	0	FALSE	2	ENSG00000079308.19;ENSG00000188282.12	TNS1;RUFY4	protein_coding;protein_coding	-;+	bidirectional	0	1	0
ENSG00000079313.15	-	REXO1	protein_coding	chr19	1845484	28	3.624799648	expressed	low	0	3.061337724	6.218000099	0	FALSE	NA	NA	NA	NA	NA	none	82.64966513	0	1
ENSG00000079332.15	-	SAR1A	protein_coding	chr10	70167524	53	33.89560709	expressed	low	0	14.44114697	20.73088461	0	FALSE	NA	NA	NA	NA	NA	none	41.16472524	0	1
ENSG00000079335.20	+	CDC14A	protein_coding	chr1	100342001	45	12.27238167	expressed	low	0	0.216636878	0.434762302	0	FALSE	2	ENSG00000223906.1;ENSG00000079335.20	AC104457.2;CDC14A	lncRNA;protein_coding	+;+	nearby_same_strand	0.240678521	0	1
ENSG00000079337.16	-	RAPGEF3	protein_coding	chr12	47768041	37	0.200926736	expressed	low	0	3.991679705	7.748072082	0	TRUE	NA	NA	NA	NA	NA	none	34.58024105	0	1
ENSG00000079385.22	-	CEACAM1	protein_coding	chr19	42558235	1	0.225551196	expressed	low	0	0.013451514	0.0621089	0	FALSE	2	ENSG00000079385.22;ENSG00000230558.2	CEACAM1;CEACAMP2	protein_coding;unprocessed_pseudogene	-;-	nearby_same_strand	0.361017781	0	0
ENSG00000079387.14	-	SENP1	protein_coding	chr12	48103080	58	13.69432032	expressed	low	0	10.11366435	13.33861046	0	FALSE	NA	NA	NA	NA	NA	none	0	0	1
ENSG00000079393.20	-	DUSP13	protein_coding	chr10	75106222	69	7.037488585	expressed	low	0	3.787853021	7.461600119	0	FALSE	NA	NA	NA	NA	NA	none	46.9221608	0	1
ENSG00000079432.7	+	CIC	protein_coding	chr19	42265537	42	2.46173032	expressed	low	0	0.961365845	2.111478988	0	TRUE	NA	NA	NA	NA	NA	none	26.62355876	0	1
ENSG00000079435.10	-	LIPE	protein_coding	chr19	42424389	5	0.141616448	expressed	low	0	0.10226604	0.373080006	0	FALSE	NA	NA	NA	NA	NA	none	0.354389771	1	0
ENSG00000079459.13	+	FDFT1	protein_coding	chr8	11792573	0	62.75878755	expressed	low	0	1.97684054	3.869960099	0	FALSE	NA	NA	NA	NA	NA	none	3.804460264	0	1
ENSG00000079462.7	-	PAFAH1B3	protein_coding	chr19	42300547	30	52.34940743	expressed	low	0	28.8258755	40.49017954	0	FALSE	NA	NA	NA	NA	NA	none	0.595068292	0	1
ENSG00000079482.13	-	OPHN1	protein_coding	chrX	68430914	24	1.096304766	expressed	low	0	1.588168655	6.707761228	0	FALSE	NA	NA	NA	NA	NA	none	6.458552004	1	1
ENSG00000079557.5	+	AFM	protein_coding	chr4	73478745	0	0.074388859	expressed	low	0	0	0	0	FALSE	NA	NA	NA	NA	NA	none	0.240678521	0	0
ENSG00000079616.12	+	KIF22	protein_coding	chr16	29787719	49	47.61912271	expressed	low	0	7.893217223	11.35292722	0	TRUE	NA	NA	NA	NA	NA	none	49.88424624	0	1
ENSG00000079689.14	+	SCGN	protein_coding	chr6	25649201	3	0.048503349	expressed	low	0	0	0	0	FALSE	NA	NA	NA	NA	NA	none	0.12033926	0	0
ENSG00000079691.18	+	CARMIL1	protein_coding	chr6	25276078	11	0.079311794	expressed	low	0	0.013182411	0.143964476	0	FALSE	NA	NA	NA	NA	NA	none	1.076425334	1	0
ENSG00000079739.17	+	PGM1	protein_coding	chr1	63590411	1	0	off	low	0	0.013182411	0.072689975	0	FALSE	NA	NA	NA	NA	NA	none	0.12033926	1	0
ENSG00000079785.15	+	DDX1	protein_coding	chr2	15588178	52	72.99352921	expressed	low	0	14.4071045	60.24430423	0	FALSE	NA	NA	NA	NA	NA	none	55.91446528	0	1
ENSG00000079805.16	+	DNM2	protein_coding	chr19	10715079	46	12.57360923	expressed	low	0	12.59331515	18.37628079	0	FALSE	2	ENSG00000079805.16;ENSG00000207972.1	DNM2;MIR638	protein_coding;miRNA	+;+	nearby_same_strand	65.84297181	0	1
ENSG00000079819.19	-	EPB41L2	protein_coding	chr6	131060323	12	4.496808228	expressed	low	0	2.864088791	6.086672225	0	FALSE	NA	NA	NA	NA	NA	none	6.906768996	0	1
ENSG00000079841.18	+	RIMS1	protein_coding	chr6	71883703	0	0.05178647	expressed	low	0	0	0	0	FALSE	NA	NA	NA	NA	NA	none	1.323731865	0	0
ENSG00000079931.15	-	MOXD1	protein_coding	chr6	132398476	1	0	off	low	0	0	0.026364822	0	FALSE	NA	NA	NA	NA	NA	none	1.083053344	1	0
ENSG00000079950.14	-	STX7	protein_coding	chr6	132510199	50	3.576327032	expressed	low	0	3.825191252	6.324027849	0	FALSE	NA	NA	NA	NA	NA	none	15.37132037	0	1
ENSG00000079974.17	-	RABL2B	protein_coding	chr22	50780664	18	0.754651848	expressed	low	0	7.02947246	15.4220798	0	FALSE	NA	NA	NA	NA	NA	none	17.71741841	0	0
ENSG00000079999.14	-	KEAP1	protein_coding	chr19	10500559	61	34.8121671	expressed	low	0	5.302355369	13.88686689	0	FALSE	NA	NA	NA	NA	NA	none	136.8273918	0	1
ENSG00000080007.8	+	DDX43	protein_coding	chr6	73391828	3	0.201913891	expressed	low	0	0	0	0	FALSE	NA	NA	NA	NA	NA	none	0.12033926	0	0
ENSG00000080031.10	-	PTPRH	protein_coding	chr19	55206507	42	20.56541519	expressed	low	0	10.85942457	40.49500297	0	TRUE	NA	NA	NA	NA	NA	none	33.39673248	0	1
ENSG00000080166.16	-	DCT	protein_coding	chr13	94476683	3	0.318420037	expressed	low	0	0.040085439	0.287928953	0	FALSE	NA	NA	NA	NA	NA	none	0.595068292	1	0
ENSG00000080189.15	-	SLC35C2	protein_coding	chr20	46361459	29	9.21906345	expressed	low	0	16.00087167	20.51183136	0	FALSE	2	ENSG00000080189.15;ENSG00000273828.2	SLC35C2;AL133227.1	protein_coding;lncRNA	-;+	bidirectional	0.595068292	0	1
ENSG00000080200.10	+	CRYBG3	protein_coding	chr3	97819011	6	0.149911548	expressed	low	0	0.013182411	0.143964476	0	FALSE	2	ENSG00000282527.1;ENSG00000080200.10	AC110491.3;CRYBG3	lncRNA;protein_coding	-;+	bidirectional	0	1	0
ENSG00000080224.17	+	EPHA6	protein_coding	chr3	96811581	0	0	off	low	0	0	0.012114996	0	FALSE	2	ENSG00000286447.1;ENSG00000080224.17	AC109782.1;EPHA6	lncRNA;protein_coding	-;+	bidirectional	0	0	0
ENSG00000080293.9	-	SCTR	protein_coding	chr2	119522302	3	0.041015491	expressed	low	0	0	0	0	FALSE	NA	NA	NA	NA	NA	none	0.361017781	1	0
ENSG00000080298.15	-	RFX3	protein_coding	chr9	3523005	50	1.0032534	expressed	low	0	10.80686912	24.19878109	0	TRUE	2	ENSG00000080298.15;ENSG00000232104.3	RFX3;RFX3-AS1	protein_coding;lncRNA	-;+	bidirectional	0.12033926	0	1
ENSG00000080345.18	+	RIF1	protein_coding	chr2	151406883	61	32.29695507	expressed	low	0	7.541323842	36.1350836	0	FALSE	NA	NA	NA	NA	NA	none	55.84052209	0	1
ENSG00000080371.6	+	RAB21	protein_coding	chr12	71751863	53	3.559288017	expressed	low	0	4.255317148	9.40567913	0	FALSE	NA	NA	NA	NA	NA	none	25.01834523	0	1
ENSG00000080493.17	+	SLC4A4	protein_coding	chr4	71059667	19	0.019832133	expressed	low	0	0.144296194	0.575857906	0	FALSE	NA	NA	NA	NA	NA	none	1.083053344	0	0
ENSG00000080503.24	+	SMARCA2	protein_coding	chr9	1977290	0	4.949167117	expressed	low	0	0	0	0	FALSE	2	ENSG00000224092.1;ENSG00000080503.24	AL591644.1;SMARCA2	processed_pseudogene;protein_coding	-;+	bidirectional	0.12033926	1	0
ENSG00000080511.5	+	RDH8	protein_coding	chr19	10010249	2	0	off	low	0	0	0.047988159	0	FALSE	NA	NA	NA	NA	NA	none	0.12033926	1	0
ENSG00000080546.13	-	SESN1	protein_coding	chr6	109091820	41	7.918069379	expressed	low	0	10.361135	21.59718701	0	FALSE	2	ENSG00000080546.13;ENSG00000183137.14	SESN1;CEP57L1	protein_coding;protein_coding	-;+	bidirectional	0	0	1
ENSG00000080561.13	+	MID2	protein_coding	chrX	107822755	1	0	off	low	0	0	0.026903028	0	FALSE	NA	NA	NA	NA	NA	none	0.12033926	1	0
ENSG00000080572.12	+	PIH1D3	protein_coding	chrX	107203632	38	0.084058255	expressed	low	0	3.791432307	5.422661947	0	FALSE	2	ENSG00000198088.10;ENSG00000080572.12	NUP62CL;PIH1D3	protein_coding;protein_coding	-;+	bidirectional	0	0	1
ENSG00000080573.7	-	COL5A3	protein_coding	chr19	10007505	4	0.003691917	expressed	low	0	0	0.012114996	0	FALSE	NA	NA	NA	NA	NA	none	0	1	0
ENSG00000080603.17	+	SRCAP	protein_coding	chr16	30695209	57	0.476947534	expressed	low	0	7.272312158	15.20021086	0	FALSE	NA	NA	NA	NA	NA	none	3.329731233	0	1
ENSG00000080608.10	-	PUM3	protein_coding	chr9	2841096	41	45.774415	expressed	low	0	3.302875794	8.925797542	0	FALSE	NA	NA	NA	NA	NA	none	28.6759542	0	1
ENSG00000080618.16	-	CPB2	protein_coding	chr13	46102034	0	0.284335455	expressed	low	0	0.15980355	0.490214718	0	FALSE	NA	NA	NA	NA	NA	none	2.286445948	0	0
ENSG00000080644.16	-	CHRNA3	protein_coding	chr15	78618296	4	0.097700494	expressed	low	0	0.011141244	0.105459287	0	FALSE	NA	NA	NA	NA	NA	none	0.474729032	1	0
ENSG00000080709.15	+	KCNN2	protein_coding	chr5	114052545	0	0	off	low	0	0	0	0	FALSE	NA	NA	NA	NA	NA	none	0.12033926	0	0
ENSG00000080802.18	-	CNOT4	protein_coding	chr7	135507128	64	3.482738515	expressed	low	0	2.884403265	6.14248433	0	FALSE	NA	NA	NA	NA	NA	none	17.69753438	0	1
ENSG00000080815.19	+	PSEN1	protein_coding	chr14	73133418	23	5.82899843	expressed	low	0	2.810561114	4.161296317	0	FALSE	NA	NA	NA	NA	NA	none	33.29627724	0	1
ENSG00000080819.9	-	CPOX	protein_coding	chr3	98590649	46	18.11748787	expressed	low	0	27.99198459	47.59473316	0	FALSE	NA	NA	NA	NA	NA	none	21.40153941	0	1
ENSG00000080822.17	-	CLDND1	protein_coding	chr3	98520067	24	9.275015676	expressed	low	0	19.40520247	34.85484315	0	FALSE	NA	NA	NA	NA	NA	none	0	0	1
ENSG00000080823.23	-	MOK	protein_coding	chr14	102302191	11	0.626284046	expressed	low	0	0.579574782	0.953426682	0	FALSE	NA	NA	NA	NA	NA	none	3.202763962	0	1
ENSG00000080824.18	-	HSP90AA1	protein_coding	chr14	102136700	17	286.2294814	expressed	low	0	3.236306668	4.8947922	0	FALSE	NA	NA	NA	NA	NA	none	0.234050511	0	1
ENSG00000080839.12	-	RBL1	protein_coding	chr20	37092998	68	12.68205003	expressed	low	0	2.881152966	7.726093571	0	FALSE	NA	NA	NA	NA	NA	none	0	0	1
ENSG00000080845.17	+	DLGAP4	protein_coding	chr20	36303336	2	0.678834533	expressed	low	0	0	0	0	FALSE	NA	NA	NA	NA	NA	none	0.601696302	1	0
ENSG00000080854.15	-	IGSF9B	protein_coding	chr11	133953986	1	0.002619816	expressed	low	0	0	0.026364822	0	FALSE	NA	NA	NA	NA	NA	none	2.406785209	1	0
ENSG00000080910.13	+	CFHR2	protein_coding	chr1	196940738	5	0	off	low	0	0	0.124217801	0	FALSE	NA	NA	NA	NA	NA	none	0.474729032	0	0
ENSG00000080986.13	+	NDC80	protein_coding	chr18	2568557	62	53.6507372	expressed	low	0	19.94051979	37.76398727	0	FALSE	2	ENSG00000101574.15;ENSG00000080986.13	METTL4;NDC80	protein_coding;protein_coding	-;+	bidirectional	0	0	1
ENSG00000081014.11	+	AP4E1	protein_coding	chr15	50905672	46	6.104802319	expressed	low	0	3.371831075	5.969280095	0	FALSE	2	ENSG00000273674.5;ENSG00000081014.11	AC021752.1;AP4E1	lncRNA;protein_coding	-;+	bidirectional	0.12033926	0	1
ENSG00000081019.13	-	RSBN1	protein_coding	chr1	113809477	57	7.669473105	expressed	low	0	8.558173731	12.53404987	0	FALSE	NA	NA	NA	NA	NA	none	0	0	1
ENSG00000081026.19	+	MAGI3	protein_coding	chr1	113387515	35	3.091552927	expressed	low	0	2.512261602	5.230709312	0	FALSE	NA	NA	NA	NA	NA	none	15.87918945	1	1
ENSG00000081041.9	-	CXCL2	protein_coding	chr4	74096197	81	7.113308701	expressed	low	0	7.023794988	14.15650685	0	FALSE	NA	NA	NA	NA	NA	none	41.82917888	0	1
ENSG00000081051.8	+	AFP	protein_coding	chr4	73428138	10	0.745260659	expressed	low	0	0.110490242	0.287928953	0	FALSE	NA	NA	NA	NA	NA	none	0.468101022	0	0
ENSG00000081052.12	-	COL4A4	protein_coding	chr2	227161454	0	0.128089569	expressed	low	0	0	0	0	FALSE	2	ENSG00000081052.12;ENSG00000169031.19	COL4A4;COL4A3	protein_coding;protein_coding	-;+	bidirectional	0	1	0
ENSG00000081059.20	+	TCF7	protein_coding	chr5	134111681	10	0.725392141	expressed	low	0	1.087571481	2.50198161	0	FALSE	NA	NA	NA	NA	NA	none	13.47240424	0	1
ENSG00000081087.15	-	OSTM1	protein_coding	chr6	108162855	2	7.717925181	expressed	low	0	0.017198742	0.047988159	0	FALSE	2	ENSG00000081087.15;ENSG00000112333.11	OSTM1;NR2E1	protein_coding;protein_coding	-;+	bidirectional	0	1	0
ENSG00000081138.14	+	CDH7	protein_coding	chr18	65747252	0	0.003000746	expressed	low	0	0	0.0621089	0	FALSE	NA	NA	NA	NA	NA	none	0.240678521	0	0
ENSG00000081148.12	-	IMPG2	protein_coding	chr3	101317576	2	0.568151328	expressed	low	0	0.092997299	1.823946696	0	FALSE	NA	NA	NA	NA	NA	none	5.22864736	0	0
ENSG00000081154.12	+	PCNP	protein_coding	chr3	101571180	50	35.18967705	expressed	low	0	394.3316563	862.6831312	0	FALSE	NA	NA	NA	NA	NA	none	86.47814974	0	1
ENSG00000081177.18	+	EXD2	protein_coding	chr14	69188511	32	3.112440166	expressed	low	0	0.80839776	1.24360002	0	FALSE	NA	NA	NA	NA	NA	none	5.021108889	0	1
ENSG00000081181.8	+	ARG2	protein_coding	chr14	67616920	35	8.401473505	expressed	low	0	5.055031524	8.52305135	0	FALSE	NA	NA	NA	NA	NA	none	8.498726502	0	1
ENSG00000081189.15	-	MEF2C	protein_coding	chr5	88901258	0	17.65743842	expressed	low	0	3.508682325	5.230709312	0	FALSE	NA	NA	NA	NA	NA	none	2.146222658	0	0
ENSG00000081237.20	+	PTPRC	protein_coding	chr1	198635457	0	37.84845598	expressed	low	0	12.21010285	33.4477467	0	FALSE	NA	NA	NA	NA	NA	none	0.829118803	0	1
ENSG00000081248.11	-	CACNA1S	protein_coding	chr1	201109452	7	0.003601093	expressed	low	0	0.005570622	0.041453334	0	FALSE	NA	NA	NA	NA	NA	none	0.240678521	1	0
ENSG00000081277.12	+	PKP1	protein_coding	chr1	201280452	0	0	off	low	0	0	0	0	FALSE	NA	NA	NA	NA	NA	none	0.12033926	1	0
ENSG00000081307.12	+	UBA5	protein_coding	chr3	132651446	14	7.539096793	expressed	low	0	0.215561665	0.863786859	0	FALSE	NA	NA	NA	NA	NA	none	2.386901179	0	0
ENSG00000081320.11	-	STK17B	protein_coding	chr2	196173504	21	7.9405616	expressed	low	0	0.006057498	0.165813336	0	FALSE	NA	NA	NA	NA	NA	none	0.12033926	0	0
ENSG00000081377.17	-	CDC14B	protein_coding	chr9	96616844	26	1.907414055	expressed	low	0	1.134316554	1.823946696	0	FALSE	NA	NA	NA	NA	NA	none	4.553007867	0	1
ENSG00000081386.12	-	ZNF510	protein_coding	chr9	96775130	56	7.333441963	expressed	low	0	6.00024022	9.299456357	0	FALSE	NA	NA	NA	NA	NA	none	18.94173012	0	1
ENSG00000081479.15	-	LRP2	protein_coding	chr2	169359535	14	0.046925617	expressed	low	0	0.005570622	0.124217801	0	FALSE	NA	NA	NA	NA	NA	none	2.821862151	1	0
ENSG00000081665.14	-	ZNF506	protein_coding	chr19	19818752	0	0.209679728	expressed	low	0	0.288053628	0.621089003	0	FALSE	2	ENSG00000267581.1;ENSG00000081665.14	AC011477.4;ZNF506	lncRNA;protein_coding	-;-	nearby_same_strand	0	0	0
ENSG00000081692.12	-	JMJD4	protein_coding	chr1	227732412	34	6.854529437	expressed	low	0	27.81476478	52.10684083	0	FALSE	NA	NA	NA	NA	NA	none	75.27023726	0	1
ENSG00000081721.12	+	DUSP12	protein_coding	chr1	161746758	48	29.83721945	expressed	low	0	26.48680473	45.20484561	0	FALSE	NA	NA	NA	NA	NA	none	48.51971123	0	1
ENSG00000081760.17	+	AACS	protein_coding	chr12	125062434	12	1.826066541	expressed	low	0	1.85005884	2.362840038	0	FALSE	NA	NA	NA	NA	NA	none	15.22343399	0	0
ENSG00000081791.9	+	DELE1	protein_coding	chr5	141920855	35	16.17369638	expressed	low	0	16.46302267	27.41860049	0	FALSE	NA	NA	NA	NA	NA	none	68.80505725	0	1
ENSG00000081800.9	-	SLC13A1	protein_coding	chr7	123196973	0	0	off	low	0	0	0	0	FALSE	NA	NA	NA	NA	NA	none	0	0	0
ENSG00000081803.16	-	CADPS2	protein_coding	chr7	122883760	4	0.193737575	expressed	low	0	0.026364822	0.331626672	0	FALSE	NA	NA	NA	NA	NA	none	2.286445948	1	0
ENSG00000081818.4	+	PCDHB4	protein_coding	chr5	141118818	0	0.024613605	expressed	low	0	0.059934749	0.095976318	0	FALSE	NA	NA	NA	NA	NA	none	1.805088907	0	0
ENSG00000081842.18	+	PCDHA6	protein_coding	chr5	140824958	0	0.004081205	expressed	low	0	0	0.047988159	0	FALSE	NA	NA	NA	NA	NA	none	0	0	0
ENSG00000081853.15	+	PCDHGA2	protein_coding	chr5	141335760	5	0.04927421	expressed	low	0	0.39900095	1.117960205	0	FALSE	NA	NA	NA	NA	NA	none	1.551154366	1	0
ENSG00000081870.11	-	HSPB11	protein_coding	chr1	53942930	46	27.75005163	expressed	low	0	23.49678646	27.49850914	0	FALSE	2	ENSG00000081870.11;ENSG00000116212.15	HSPB11;LRRC42	protein_coding;protein_coding	-;+	bidirectional	0.361017781	0	1
ENSG00000081913.14	+	PHLPP1	protein_coding	chr18	62712541	39	2.940321041	expressed	low	0	4.087600117	6.135093431	0	FALSE	NA	NA	NA	NA	NA	none	25.58690149	0	1
ENSG00000081923.14	-	ATP8B1	protein_coding	chr18	57800316	1	0.109867536	expressed	low	0	0.005570622	0.053806056	0	FALSE	NA	NA	NA	NA	NA	none	1.203392604	1	0
ENSG00000081985.11	+	IL12RB2	protein_coding	chr1	67304364	1	1.633686786	expressed	low	0	2.394201821	5.626328015	0	FALSE	NA	NA	NA	NA	NA	none	4.620323048	0	0
ENSG00000082014.16	-	SMARCD3	protein_coding	chr7	151274897	9	1.275830501	expressed	low	0	0	0.0621089	0	FALSE	NA	NA	NA	NA	NA	none	0.722035563	1	0
ENSG00000082068.9	+	WDR70	protein_coding	chr5	37376285	35	15.03344401	expressed	low	0	11.5774974	57.93388029	0	FALSE	NA	NA	NA	NA	NA	none	21.95683964	0	1
ENSG00000082074.18	-	FYB1	protein_coding	chr5	39271529	6	4.944349161	expressed	low	0	0.105748757	0.248435601	0	FALSE	NA	NA	NA	NA	NA	none	0.361017781	0	0
ENSG00000082126.18	-	MPP4	protein_coding	chr2	201695695	0	0.024110815	expressed	low	0	4.960115876	8.301951477	0	FALSE	NA	NA	NA	NA	NA	none	5.616177181	0	0
ENSG00000082146.13	+	STRADB	protein_coding	chr2	201384858	1	13.27969213	expressed	low	0	12.12758535	23.99407941	0	FALSE	NA	NA	NA	NA	NA	none	10.85911564	0	0
ENSG00000082153.18	+	BZW1	protein_coding	chr2	200807594	31	51.23540585	expressed	low	0	22.99621271	46.0961074	0	FALSE	NA	NA	NA	NA	NA	none	0.12033926	0	1
ENSG00000082175.15	-	PGR	protein_coding	chr11	101126814	15	0.30972955	expressed	low	0	0.999726975	1.502794842	0	FALSE	NA	NA	NA	NA	NA	none	0	1	1
ENSG00000082196.20	-	C1QTNF3	protein_coding	chr5	34040833	0	0.641819028	expressed	low	0	1.006369911	1.6315974	0	FALSE	NA	NA	NA	NA	NA	none	7.027108256	1	0
ENSG00000082212.13	+	ME2	protein_coding	chr18	50876080	30	3.541133976	expressed	low	0	3.783584332	4.601320073	0	FALSE	NA	NA	NA	NA	NA	none	40.15458001	0	1
ENSG00000082213.18	+	C5orf22	protein_coding	chr5	31529287	43	12.38760613	expressed	low	0	15.58326801	18.41479374	0	FALSE	2	ENSG00000113360.16;ENSG00000082213.18	DROSHA;C5orf22	protein_coding;protein_coding	-;+	bidirectional	0.234050511	0	1
ENSG00000082258.13	+	CCNT2	protein_coding	chr2	134915235	56	9.067486839	expressed	low	0	3.709654661	9.885560718	0	FALSE	NA	NA	NA	NA	NA	none	0.12033926	0	1
ENSG00000082269.16	+	FAM135A	protein_coding	chr6	70409941	44	6.49399387	expressed	low	0	3.456902787	9.021773859	0	FALSE	NA	NA	NA	NA	NA	none	2.962085441	0	1
ENSG00000082293.13	+	COL19A1	protein_coding	chr6	69863556	5	0.008207889	expressed	low	0	0	0.057760598	0	FALSE	NA	NA	NA	NA	NA	none	0	1	0
ENSG00000082397.17	-	EPB41L3	protein_coding	chr18	5627701	0	0	off	low	0	0	0.036344988	0	FALSE	NA	NA	NA	NA	NA	none	1.684749646	0	0
ENSG00000082438.17	-	COBLL1	protein_coding	chr2	164840680	4	0.073999381	expressed	low	0	0.02556651	0.20726667	0	FALSE	NA	NA	NA	NA	NA	none	0	0	0
ENSG00000082458.12	+	DLG3	protein_coding	chrX	70441835	1	3.393405806	expressed	low	0	0	0.026903028	0	FALSE	NA	NA	NA	NA	NA	none	1.912172147	1	0
ENSG00000082482.13	+	KCNK2	protein_coding	chr1	215002775	1	0.18194715	expressed	low	0	1.072798805	1.801158107	0	FALSE	NA	NA	NA	NA	NA	none	0	0	0
ENSG00000082497.12	+	SERTAD4	protein_coding	chr1	210229796	0	0.004578112	expressed	low	0	0.006057498	0.0621089	0	FALSE	NA	NA	NA	NA	NA	none	0	1	0
ENSG00000082512.15	+	TRAF5	protein_coding	chr1	211323615	17	1.746935277	expressed	low	0	0.512666716	1.247692129	0	FALSE	NA	NA	NA	NA	NA	none	8.644542722	0	0
ENSG00000082515.18	+	MRPL22	protein_coding	chr5	154938073	50	11.47030393	expressed	low	0	13.23598428	18.07365362	0	FALSE	NA	NA	NA	NA	NA	none	7.247902747	0	1
ENSG00000082516.9	-	GEMIN5	protein_coding	chr5	154935212	50	21.73684584	expressed	low	0	17.48204218	31.01744139	0	FALSE	NA	NA	NA	NA	NA	none	10.24312824	0	1
ENSG00000082556.12	-	OPRK1	protein_coding	chr8	53248698	0	0.003798783	expressed	low	0	0	0	0	FALSE	NA	NA	NA	NA	NA	none	0.361017781	1	0
ENSG00000082641.16	+	NFE2L1	protein_coding	chr17	48045329	67	31.67597133	expressed	low	0	42.11743838	66.27019657	0	FALSE	2	ENSG00000263412.1;ENSG00000082641.16	AC004477.1;NFE2L1	lncRNA;protein_coding	-;+	bidirectional	2.527124469	0	1
ENSG00000082684.16	-	SEMA5B	protein_coding	chr3	123025606	4	0.005118567	expressed	low	0	0	0	0	FALSE	NA	NA	NA	NA	NA	none	0.962714084	1	0
ENSG00000082701.15	-	GSK3B	protein_coding	chr3	120091418	39	4.850771571	expressed	low	0	10.99881687	17.1317727	0	FALSE	2	ENSG00000082701.15;ENSG00000242622.2	GSK3B;AC092910.3	protein_coding;lncRNA	-;+	bidirectional	0.354389771	0	1
ENSG00000082781.12	-	ITGB5	protein_coding	chr3	124898419	4	6.22606668	expressed	low	0	0.044720746	0.20595493	0	FALSE	NA	NA	NA	NA	NA	none	0.601696302	1	0
ENSG00000082805.20	+	ERC1	protein_coding	chr12	987509	43	1.244796318	expressed	low	0	3.580974003	5.00396322	0	FALSE	2	ENSG00000002016.18;ENSG00000082805.20	RAD52;ERC1	protein_coding;protein_coding	-;+	bidirectional	0	0	1
ENSG00000082898.17	-	XPO1	protein_coding	chr2	61535627	60	68.85687412	expressed	low	0	53.25691699	87.19448459	0	FALSE	NA	NA	NA	NA	NA	none	77.43634395	0	1
ENSG00000082929.8	+	LINC01587	lncRNA	chr4	5521569	0	0	off	low	0	0.119869499	0.431893429	0	FALSE	NA	NA	NA	NA	NA	none	0.715407553	0	0
ENSG00000082996.19	+	RNF13	protein_coding	chr3	149809708	27	7.468241084	expressed	low	0	1.944814726	6.5263896	0	FALSE	NA	NA	NA	NA	NA	none	5.034364909	0	1
ENSG00000083067.22	-	TRPM3	protein_coding	chr9	71443905	3	0.008314652	expressed	low	0	0.059934749	0.331626672	0	FALSE	NA	NA	NA	NA	NA	none	0.361017781	1	0
ENSG00000083093.9	-	PALB2	protein_coding	chr16	23638311	55	8.444972727	expressed	low	0	22.60812471	29.25329202	0	FALSE	2	ENSG00000083093.9;ENSG00000166847.10	PALB2;DCTN5	protein_coding;protein_coding	-;+	bidirectional	0.474729032	0	1
ENSG00000083097.14	+	DOP1A	protein_coding	chr6	83064666	29	3.849645989	expressed	low	0	1.765328396	6.383813435	0	FALSE	2	ENSG00000118420.17;ENSG00000083097.14	UBE3D;DOP1A	protein_coding;protein_coding	-;+	bidirectional	0.12033926	0	1
ENSG00000083099.11	-	LYRM2	protein_coding	chr6	89635750	28	11.47488717	expressed	low	0	42.92378411	75.82129094	0	FALSE	NA	NA	NA	NA	NA	none	55.97618753	0	1
ENSG00000083123.15	+	BCKDHB	protein_coding	chr6	80103647	19	4.099337866	expressed	low	0	1.957189828	2.860280045	0	FALSE	NA	NA	NA	NA	NA	none	14.69568087	0	1
ENSG00000083168.11	-	KAT6A	protein_coding	chr8	42048995	52	4.681639823	expressed	low	0	6.056234472	12.76485025	0	FALSE	NA	NA	NA	NA	NA	none	33.88368245	0	1
ENSG00000083223.18	-	TUT7	protein_coding	chr9	86351455	38	8.869575123	expressed	low	0	9.935013139	19.1187581	0	FALSE	NA	NA	NA	NA	NA	none	19.18240864	0	1
ENSG00000083290.20	-	ULK2	protein_coding	chr17	19864937	0	0.068990469	expressed	low	0	0	0.053806056	0	FALSE	2	ENSG00000083290.20;ENSG00000276406.1	ULK2;AC015726.2	protein_coding;lncRNA	-;+	bidirectional	0	0	0
ENSG00000083307.12	+	GRHL2	protein_coding	chr8	101489439	1	0	off	low	0	0	0	0	FALSE	NA	NA	NA	NA	NA	none	0	1	0
ENSG00000083312.17	+	TNPO1	protein_coding	chr5	72813312	31	41.63243415	expressed	low	0	1.25424167	4.126981659	0	FALSE	NA	NA	NA	NA	NA	none	0	0	1
ENSG00000083444.17	+	PLOD1	protein_coding	chr1	11931205	48	19.30812808	expressed	low	0	7.089178921	9.837718094	0	FALSE	NA	NA	NA	NA	NA	none	23.56868118	0	1
ENSG00000083454.22	-	P2RX5	protein_coding	chr17	3693241	4	0.5538382	expressed	low	0	0.443217561	0.632755723	0	FALSE	2	ENSG00000257950.3;ENSG00000083454.22	P2RX5-TAX1BP3;P2RX5	protein_coding;protein_coding	-;-	nearby_same_strand	0	1	0
ENSG00000083457.12	-	ITGAE	protein_coding	chr17	3798189	2	3.061640256	expressed	low	0	1.407069806	1.883211964	0	FALSE	NA	NA	NA	NA	NA	none	20.98086954	0	0
ENSG00000083520.15	-	DIS3	protein_coding	chr13	72779097	41	11.37108212	expressed	low	0	17.59034482	32.92354114	0	FALSE	2	ENSG00000083520.15;ENSG00000083535.16	DIS3;PIBF1	protein_coding;protein_coding	-;+	bidirectional	0	0	1
ENSG00000083535.16	+	PIBF1	protein_coding	chr13	72779133	41	15.51568029	expressed	low	0	17.59034482	32.92354114	0	FALSE	2	ENSG00000083520.15;ENSG00000083535.16	DIS3;PIBF1	protein_coding;protein_coding	-;+	bidirectional	0	0	1
ENSG00000083544.14	+	TDRD3	protein_coding	chr13	60393457	49	4.061454472	expressed	low	0	1.204642352	3.071242165	0	FALSE	NA	NA	NA	NA	NA	none	45.20986403	0	1
ENSG00000083622.8	-	AC000061.1	lncRNA	chr7	117644416	0	0	off	low	0	0	0	0	FALSE	NA	NA	NA	NA	NA	none	0	0	0
ENSG00000083635.8	-	NUFIP1	protein_coding	chr13	44986472	24	3.981410638	expressed	low	0	7.054491766	9.492813484	0	FALSE	2	ENSG00000083635.8;ENSG00000133114.17	NUFIP1;GPALPP1	protein_coding;protein_coding	-;+	bidirectional	0.12033926	0	1
ENSG00000083642.19	+	PDS5B	protein_coding	chr13	32583452	26	2.813082465	expressed	low	0	1.54342213	4.270946135	0	FALSE	NA	NA	NA	NA	NA	none	9.828051296	0	1
ENSG00000083720.13	-	OXCT1	protein_coding	chr5	41867426	25	34.72904077	expressed	low	0	8.855107281	12.52490945	0	FALSE	NA	NA	NA	NA	NA	none	0	0	1
ENSG00000083750.12	+	RRAGB	protein_coding	chrX	55714739	26	4.88539518	expressed	low	0	4.3797065	6.766330394	0	FALSE	NA	NA	NA	NA	NA	none	8.13004563	0	1
ENSG00000083782.8	-	EPYC	protein_coding	chr12	91002027	0	0.012096236	expressed	low	0	0	0.041453334	0	FALSE	NA	NA	NA	NA	NA	none	0	0	0
ENSG00000083799.17	+	CYLD	protein_coding	chr16	50739050	19	2.546057741	expressed	low	0	0.52526623	2.321386704	0	FALSE	2	ENSG00000083799.17;ENSG00000264947.1	CYLD;MIR3181	protein_coding;miRNA	+;+	nearby_same_strand	0	0	0
ENSG00000083807.10	-	SLC27A5	protein_coding	chr19	58509414	35	5.020750261	expressed	low	0	3.370471303	7.344526661	0	FALSE	NA	NA	NA	NA	NA	none	86.63162906	0	1
ENSG00000083812.12	+	ZNF324	protein_coding	chr19	58464045	21	5.801345796	expressed	low	0	4.40808136	9.078280144	0	FALSE	NA	NA	NA	NA	NA	none	50.77405221	0	1
ENSG00000083814.13	-	ZNF671	protein_coding	chr19	57724625	11	1.732406181	expressed	low	0	0.804973435	1.910114992	0	FALSE	NA	NA	NA	NA	NA	none	18.83568196	0	1
ENSG00000083817.9	-	ZNF416	protein_coding	chr19	57575912	13	2.030880258	expressed	low	0	0.588863509	1.6315974	0	FALSE	NA	NA	NA	NA	NA	none	0	0	1
ENSG00000083828.16	+	ZNF586	protein_coding	chr19	57766655	24	4.459793323	expressed	low	0	2.350676937	5.950531694	0	FALSE	NA	NA	NA	NA	NA	none	25.11983554	0	1
ENSG00000083838.16	+	ZNF446	protein_coding	chr19	58471017	40	1.800958705	expressed	low	0	23.2235019	40.69395868	0	FALSE	NA	NA	NA	NA	NA	none	30.47545017	0	1
ENSG00000083844.10	+	ZNF264	protein_coding	chr19	57188500	13	1.087570493	expressed	low	0	1.774341273	5.950531694	0	FALSE	NA	NA	NA	NA	NA	none	6.324956724	0	1
ENSG00000083845.9	+	RPS5	protein_coding	chr19	58383400	46	335.2717809	expressed	low	0	391.8610724	561.4937141	0	FALSE	NA	NA	NA	NA	NA	none	114.1240747	0	1
ENSG00000083857.14	-	FAT1	protein_coding	chr4	186723723	22	13.44650471	expressed	low	0	0.986650611	3.109000049	0	FALSE	NA	NA	NA	NA	NA	none	19.46948323	1	1
ENSG00000083896.12	-	YTHDC1	protein_coding	chr4	68347090	0	18.73615524	expressed	low	0	9.666333794	17.37171349	0	FALSE	NA	NA	NA	NA	NA	none	6.692602515	0	1
ENSG00000083937.9	+	CHMP2B	protein_coding	chr3	87224271	22	8.136354009	expressed	low	0	4.880638114	5.762013425	0	FALSE	2	ENSG00000264119.1;ENSG00000083937.9	MIR4795;CHMP2B	miRNA;protein_coding	-;+	bidirectional	7.869483079	0	1
ENSG00000084070.12	+	SMAP2	protein_coding	chr1	40341850	13	51.39142475	expressed	low	0	0	0.012114996	0	FALSE	NA	NA	NA	NA	NA	none	0.12033926	0	0
ENSG00000084072.16	+	PPIE	protein_coding	chr1	39689182	9	12.45687349	expressed	low	0	0.012114996	0.095976318	0	FALSE	2	ENSG00000116983.13;ENSG00000084072.16	HPCAL4;PPIE	protein_coding;protein_coding	-;+	bidirectional	0	1	0
ENSG00000084073.9	+	ZMPSTE24	protein_coding	chr1	40255236	59	40.73995954	expressed	low	0	47.97655096	65.35987232	0	FALSE	2	ENSG00000259943.1;ENSG00000084073.9	AL050341.2;ZMPSTE24	lncRNA;protein_coding	-;+	bidirectional	0.354389771	0	1
ENSG00000084090.13	-	STARD7	protein_coding	chr2	96205826	56	92.61469405	expressed	low	0	40.39551849	61.1022143	0	FALSE	NA	NA	NA	NA	NA	none	1.778576867	0	1
ENSG00000084092.7	-	NOA1	protein_coding	chr4	56974607	54	22.96132478	expressed	low	0	42.46690983	69.62407719	0	FALSE	2	ENSG00000084092.7;ENSG00000047315.16	NOA1;POLR2B	protein_coding;protein_coding	-;+	bidirectional	0.12033926	0	1
ENSG00000084093.17	+	REST	protein_coding	chr4	56904876	34	9.978580257	expressed	low	0	4.565982435	11.22922917	0	FALSE	NA	NA	NA	NA	NA	none	53.02528795	1	1
ENSG00000084110.11	-	HAL	protein_coding	chr12	95993366	2	0.054612931	expressed	low	0	0.050358901	0.248720004	0	FALSE	2	ENSG00000084110.11;ENSG00000257878.1	HAL;AC007298.2	protein_coding;lncRNA	-;+	bidirectional	0	1	0
ENSG00000084112.15	-	SSH1	protein_coding	chr12	108854591	75	0.838261277	expressed	low	0	0.80262886	1.239146625	0	FALSE	2	ENSG00000084112.15;ENSG00000110887.8	SSH1;DAO	protein_coding;protein_coding	-;+	bidirectional	2.881514241	1	1
ENSG00000084207.17	+	GSTP1	protein_coding	chr11	67580595	54	367.7244225	expressed	low	0	469.7430149	691.2757977	0	FALSE	NA	NA	NA	NA	NA	none	100.2763616	0	1
ENSG00000084234.17	+	APLP2	protein_coding	chr11	130065147	38	56.66925734	expressed	low	0	13.99765806	25.36295857	0	FALSE	NA	NA	NA	NA	NA	none	36.67799748	0	1
ENSG00000084444.14	+	FAM234B	protein_coding	chr12	13041381	11	1.698835424	expressed	low	0	0.196796685	0.431893429	0	FALSE	NA	NA	NA	NA	NA	none	8.510947442	1	0
ENSG00000084453.16	-	SLCO1A2	protein_coding	chr12	21416595	32	1.30673595	expressed	low	0	1.888818972	2.794900511	0	FALSE	NA	NA	NA	NA	NA	none	3.329731233	0	1
ENSG00000084463.8	-	WBP11	protein_coding	chr12	14800487	20	11.00383498	expressed	low	0	15.84756633	59.89774064	0	FALSE	3	ENSG00000084463.8;ENSG00000182993.5;ENSG00000286107.1	WBP11;C12orf60;AC007655.2	protein_coding;protein_coding;lncRNA	-;+;+	multiple_nearby_promoters	0	0	1
ENSG00000084623.11	+	EIF3I	protein_coding	chr1	32218928	35	431.9506454	expressed	low	0	182.2107276	305.7846084	0	FALSE	NA	NA	NA	NA	NA	none	3.202763962	0	1
ENSG00000084628.10	-	NKAIN1	protein_coding	chr1	31236888	0	0.028216681	expressed	low	0	0.025297407	0.047988159	0	FALSE	NA	NA	NA	NA	NA	none	0.722035563	1	0
ENSG00000084636.18	-	COL16A1	protein_coding	chr1	31701320	32	0.002355714	expressed	low	0	0.016711865	0.095976318	0	FALSE	NA	NA	NA	NA	NA	none	0.240678521	1	0
ENSG00000084652.16	+	TXLNA	protein_coding	chr1	32176675	54	44.26380518	expressed	low	0	33.34739149	84.21966875	0	FALSE	NA	NA	NA	NA	NA	none	124.0846862	0	1
ENSG00000084674.14	-	APOB	protein_coding	chr2	21041074	2	0	off	low	0	0	0.047988159	0	FALSE	NA	NA	NA	NA	NA	none	2.166106688	1	0
ENSG00000084676.15	+	NCOA1	protein_coding	chr2	24488914	47	9.191446151	expressed	low	0	1.603834869	8.014022524	0	FALSE	NA	NA	NA	NA	NA	none	36.51126215	0	1
ENSG00000084693.16	+	AGBL5	protein_coding	chr2	27039364	8	14.39201747	expressed	low	0	51.38148837	110.6436901	0	FALSE	NA	NA	NA	NA	NA	none	53.35523584	0	0
ENSG00000084710.14	+	EFR3B	protein_coding	chr2	25039076	4	0.004400986	expressed	low	0	0	0	0	FALSE	NA	NA	NA	NA	NA	none	3.008481511	1	0
ENSG00000084731.15	-	KIF3C	protein_coding	chr2	25979750	19	1.38345961	expressed	low	0	6.022068244	16.39674967	0	FALSE	NA	NA	NA	NA	NA	none	33.71694712	0	1
ENSG00000084733.11	+	RAB10	protein_coding	chr2	26031084	45	62.7197215	expressed	low	0	43.2556235	65.11993153	0	FALSE	NA	NA	NA	NA	NA	none	76.35991861	0	1
ENSG00000084734.9	+	GCKR	protein_coding	chr2	27493839	19	0.227978109	expressed	low	0	1.659558566	3.540207315	0	FALSE	2	ENSG00000115226.10;ENSG00000084734.9	FNDC4;GCKR	protein_coding;protein_coding	-;+	bidirectional	0.12033926	0	0
ENSG00000084754.12	-	HADHA	protein_coding	chr2	26241673	55	159.084868	expressed	low	0	31.73337969	53.55478525	0	FALSE	NA	NA	NA	NA	NA	none	1.203392604	0	1
ENSG00000084764.12	+	MAPRE3	protein_coding	chr2	26967637	23	5.297569156	expressed	low	0	1.905517422	5.407508641	0	FALSE	NA	NA	NA	NA	NA	none	17.46348387	1	1
ENSG00000084774.14	+	CAD	protein_coding	chr2	27214369	31	22.72925222	expressed	low	0	82.11634775	89.37232461	0	FALSE	NA	NA	NA	NA	NA	none	52.92027487	0	1
ENSG00000085063.16	-	CD59	protein_coding	chr11	33733492	48	23.02262012	expressed	low	0	16.79769034	26.40577375	0	FALSE	NA	NA	NA	NA	NA	none	36.58624042	0	1
ENSG00000085117.12	+	CD82	protein_coding	chr11	44561427	17	1.82461854	expressed	low	0	0.971437994	1.291345347	0	FALSE	NA	NA	NA	NA	NA	none	7.589036499	0	1
ENSG00000085185.15	+	BCORL1	protein_coding	chrX	129978107	24	0.593384787	expressed	low	0	0.471608766	2.125339217	0	FALSE	NA	NA	NA	NA	NA	none	27.08503177	0	1
ENSG00000085224.22	-	ATRX	protein_coding	chrX	77783234	16	4.611833007	expressed	low	0	2.600616377	4.606863247	0	FALSE	NA	NA	NA	NA	NA	none	5.723260421	0	1
ENSG00000085231.14	-	AK6	protein_coding	chr5	69367014	0	35.26284193	expressed	low	0	49.75030134	69.3428895	0	FALSE	2	ENSG00000085231.14;ENSG00000273841.5	AK6;TAF9	protein_coding;protein_coding	-;-	nearby_same_strand	0	0	1
ENSG00000085265.11	-	FCN1	protein_coding	chr9	134914913	0	0	off	low	0	0	0	0	FALSE	NA	NA	NA	NA	NA	none	0.240678521	1	0
ENSG00000085274.15	+	MYNN	protein_coding	chr3	169769831	50	6.24360608	expressed	low	0	6.793821045	15.29628024	0	FALSE	NA	NA	NA	NA	NA	none	45.17775906	0	1
ENSG00000085276.19	-	MECOM	protein_coding	chr3	169660776	15	5.929258694	expressed	low	0	0.035734001	0.082906668	0	FALSE	NA	NA	NA	NA	NA	none	2.988597481	1	0
ENSG00000085365.18	+	SCAMP1	protein_coding	chr5	78357611	43	7.635465048	expressed	low	0	16.99951036	29.56070584	0	FALSE	2	ENSG00000245556.3;ENSG00000085365.18	SCAMP1-AS1;SCAMP1	lncRNA;protein_coding	-;+	bidirectional	0	0	1
ENSG00000085377.14	-	PREP	protein_coding	chr6	105451063	0	5.21760246	expressed	low	0	0	0.026364822	0	FALSE	NA	NA	NA	NA	NA	none	0.240678521	1	0
ENSG00000085382.12	-	HACE1	protein_coding	chr6	104856920	26	4.96283058	expressed	low	0	2.048705255	3.979520063	0	FALSE	2	ENSG00000085382.12;ENSG00000271099.1	HACE1;AL357315.2	protein_coding;processed_pseudogene	-;+	bidirectional	17.78473359	0	1
ENSG00000085415.16	+	SEH1L	protein_coding	chr18	12944133	78	13.33926118	expressed	low	0	16.92927064	24.18603205	0	FALSE	NA	NA	NA	NA	NA	none	105.551405	0	1
ENSG00000085433.15	-	WDR47	protein_coding	chr1	109039114	30	5.97089367	expressed	low	0	0.752832358	2.207455306	0	FALSE	NA	NA	NA	NA	NA	none	31.63037655	0	1
ENSG00000085449.15	-	WDFY1	protein_coding	chr2	223942358	26	8.633198571	expressed	low	0	3.300453866	5.181666749	0	FALSE	2	ENSG00000286239.1;ENSG00000085449.15	AC093884.1;WDFY1	protein_coding;protein_coding	-;-	nearby_same_strand	0	0	1
ENSG00000085465.13	-	OVGP1	protein_coding	chr1	111424736	0	0.380029627	expressed	low	0	0.683563621	1.671186539	0	FALSE	NA	NA	NA	NA	NA	none	4.051766795	1	0
ENSG00000085491.17	-	SLC25A24	protein_coding	chr1	108197850	1	11.13298263	expressed	low	0	10.70399257	16.76940307	0	FALSE	NA	NA	NA	NA	NA	none	0.12033926	0	1
ENSG00000085511.20	+	MAP3K4	protein_coding	chr6	160988727	49	27.25930557	expressed	low	0	7.085048709	13.92832022	0	FALSE	NA	NA	NA	NA	NA	none	0.361017781	0	1
ENSG00000085514.16	+	PILRA	protein_coding	chr7	100364530	16	0.622468745	expressed	low	0	23.04572555	28.16904923	0	FALSE	NA	NA	NA	NA	NA	none	328.7397125	0	0
ENSG00000085552.17	-	IGSF9	protein_coding	chr1	159942614	14	0.086994726	expressed	low	0	0.038899161	0.191952635	0	FALSE	NA	NA	NA	NA	NA	none	1.905544137	1	0
ENSG00000085563.14	-	ABCB1	protein_coding	chr7	87710324	0	1.150208663	expressed	low	0	0	0.057760598	0	FALSE	NA	NA	NA	NA	NA	none	0.240678521	0	0
ENSG00000085644.14	+	ZNF213	protein_coding	chr16	3126777	18	0.76468006	expressed	low	0	8.919882354	15.15209129	0	FALSE	NA	NA	NA	NA	NA	none	60.83159617	0	1
ENSG00000085662.14	-	AKR1B1	protein_coding	chr7	134456285	3	0.526205693	expressed	low	0	0.290899514	0.581519802	0	FALSE	NA	NA	NA	NA	NA	none	0.942830054	1	0
ENSG00000085719.13	+	CPNE3	protein_coding	chr8	86511435	14	14.62746175	expressed	low	0	4.584888125	8.637868589	0	FALSE	2	ENSG00000176623.12;ENSG00000085719.13	RMDN1;CPNE3	protein_coding;protein_coding	-;+	bidirectional	0	0	1
ENSG00000085721.12	-	RRN3	protein_coding	chr16	15091318	7	23.52677957	expressed	low	0	5.758037102	14.92320024	0	FALSE	2	ENSG00000085721.12;ENSG00000260735.2	RRN3;AC139256.1	protein_coding;transcribed_processed_pseudogene	-;+	bidirectional	17.81787364	0	1
ENSG00000085733.16	+	CTTN	protein_coding	chr11	70395404	0	38.69787924	expressed	low	0	13.15238821	17.45260097	0	FALSE	NA	NA	NA	NA	NA	none	0.595068292	0	1
ENSG00000085741.13	-	WNT11	protein_coding	chr11	76207737	16	0.417210731	expressed	low	0	0	0.052729644	0	FALSE	NA	NA	NA	NA	NA	none	0.240678521	1	0
ENSG00000085760.15	-	MTIF2	protein_coding	chr2	55266348	46	69.67076457	expressed	low	0	29.6692493	54.00615959	0	FALSE	NA	NA	NA	NA	NA	none	26.61030274	0	1
ENSG00000085788.14	+	DDHD2	protein_coding	chr8	38222218	3	12.2861679	expressed	low	0	1.256198236	2.478293249	0	FALSE	NA	NA	NA	NA	NA	none	15.28412116	0	0
ENSG00000085831.15	-	TTC39A	protein_coding	chr1	51342117	17	0.1574266	expressed	low	0	0.081659165	0.953426682	0	FALSE	NA	NA	NA	NA	NA	none	36.98039825	1	0
ENSG00000085832.17	-	EPS15	protein_coding	chr1	51516267	88	41.02499189	expressed	low	0	18.69540068	35.33996425	0	FALSE	NA	NA	NA	NA	NA	none	3.704005034	0	1
ENSG00000085840.13	-	ORC1	protein_coding	chr1	52401424	72	65.01836567	expressed	low	0	58.88753624	84.41117137	0	TRUE	2	ENSG00000085840.13;ENSG00000134748.13	ORC1;PRPF38A	protein_coding;protein_coding	-;+	bidirectional	0.842374823	0	1
ENSG00000085871.9	+	MGST2	protein_coding	chr4	139662768	46	17.28561037	expressed	low	0	11.81289143	17.20313361	0	FALSE	NA	NA	NA	NA	NA	none	7.85622706	0	1
ENSG00000085872.15	-	CHERP	protein_coding	chr19	16539438	33	1.358587465	expressed	low	0	9.56306937	15.31796146	0	FALSE	2	ENSG00000085872.15;ENSG00000269399.2	CHERP;AC008764.6	protein_coding;lncRNA	-;+	bidirectional	1.083053344	0	1
ENSG00000085978.22	+	ATG16L1	protein_coding	chr2	233207051	0	8.184331534	expressed	low	0	2.018968413	3.005589685	0	FALSE	NA	NA	NA	NA	NA	none	3.329731233	0	0
ENSG00000085982.13	-	USP40	protein_coding	chr2	233563783	30	5.166071119	expressed	low	0	2.142154427	5.758579059	0	FALSE	NA	NA	NA	NA	NA	none	18.52665318	0	1
ENSG00000085998.14	-	POMGNT1	protein_coding	chr1	46217306	3	13.83907758	expressed	low	0	0.811392849	2.277619225	0	FALSE	NA	NA	NA	NA	NA	none	5.007852869	0	0
ENSG00000085999.13	+	RAD54L	protein_coding	chr1	46243461	53	11.50300255	expressed	low	0	11.61554577	25.62660679	0	FALSE	NA	NA	NA	NA	NA	none	33.13616992	0	1
ENSG00000086015.21	+	MAST2	protein_coding	chr1	45783987	6	4.806293996	expressed	low	0	0.069834722	0.287928953	0	FALSE	NA	NA	NA	NA	NA	none	0.354389771	0	0
ENSG00000086061.16	+	DNAJA1	protein_coding	chr9	33022273	33	130.8251557	expressed	low	0	72.53035239	113.8723085	0	FALSE	2	ENSG00000137074.19;ENSG00000086061.16	APTX;DNAJA1	protein_coding;protein_coding	-;+	bidirectional	0.361017781	0	1
ENSG00000086062.12	-	B4GALT1	protein_coding	chr9	33164357	45	3.889207182	expressed	low	0	2.915627726	7.317623633	0	FALSE	NA	NA	NA	NA	NA	none	0	0	1
ENSG00000086065.14	+	CHMP5	protein_coding	chr9	33261879	38	31.78934912	expressed	low	0	44.94132157	89.37470747	0	FALSE	2	ENSG00000107262.23;ENSG00000086065.14	BAG1;CHMP5	protein_coding;protein_coding	-;+	bidirectional	0.234050511	0	1
ENSG00000086102.19	+	NFX1	protein_coding	chr9	33287512	65	9.656464333	expressed	low	0	4.62372217	8.109998842	0	FALSE	NA	NA	NA	NA	NA	none	42.19578959	0	1
ENSG00000086159.13	+	AQP6	protein_coding	chr12	49964194	16	0	off	low	1	0	0.024229992	1	FALSE	NA	NA	NA	NA	NA	none	1.785204877	1	1
ENSG00000086189.10	-	DIMT1	protein_coding	chr5	62400940	35	19.2815297	expressed	low	0	21.28964429	33.5357472	0	FALSE	2	ENSG00000086189.10;ENSG00000086200.16	DIMT1;IPO11	protein_coding;protein_coding	-;+	bidirectional	0.240678521	0	1
ENSG00000086200.16	+	IPO11	protein_coding	chr5	62400972	35	12.88966172	expressed	low	0	21.28964429	33.36993386	0	FALSE	2	ENSG00000086189.10;ENSG00000086200.16	DIMT1;IPO11	protein_coding;protein_coding	-;+	bidirectional	0	0	1
ENSG00000086205.18	-	FOLH1	protein_coding	chr11	49205639	0	0	off	low	0	0	0	0	FALSE	NA	NA	NA	NA	NA	none	0.842374823	0	0
ENSG00000086232.13	-	EIF2AK1	protein_coding	chr7	6056176	74	35.20156957	expressed	low	0	12.48698965	21.48732977	0	FALSE	NA	NA	NA	NA	NA	none	54.09612035	0	1
ENSG00000086288.12	+	NME8	protein_coding	chr7	37845597	2	0.010284301	expressed	low	0	0	0.052729644	0	FALSE	NA	NA	NA	NA	NA	none	0.842374823	1	0
ENSG00000086289.12	+	EPDR1	protein_coding	chr7	37680843	0	0	off	low	0	0	0.041453334	0	FALSE	2	ENSG00000187037.8;ENSG00000086289.12	GPR141;EPDR1	protein_coding;protein_coding	+;+	nearby_same_strand	0	0	0
ENSG00000086300.15	+	SNX10	protein_coding	chr7	26288895	26	4.315936917	expressed	low	0	2.510937418	7.739920198	0	FALSE	NA	NA	NA	NA	NA	none	7.795539889	0	1
ENSG00000086475.15	-	SEPHS1	protein_coding	chr10	13345299	22	20.4643055	expressed	low	0	4.117046376	6.715440107	0	FALSE	NA	NA	NA	NA	NA	none	70.06043885	0	1
ENSG00000086504.17	-	MRPL28	protein_coding	chr16	368290	17	49.75651398	expressed	low	0	120.7633213	146.4231172	0	FALSE	NA	NA	NA	NA	NA	none	74.21473104	0	1
ENSG00000086506.3	+	HBQ1	protein_coding	chr16	177459	40	30.44757068	expressed	low	0	44.61148189	117.5343756	0	FALSE	NA	NA	NA	NA	NA	none	136.941103	0	1
ENSG00000086544.3	+	ITPKC	protein_coding	chr19	40714112	55	5.91954898	expressed	low	0	10.77308484	18.81899678	0	FALSE	NA	NA	NA	NA	NA	none	8.591518642	0	1
ENSG00000086548.9	+	CEACAM6	protein_coding	chr19	41747977	1	0	off	low	0	0	0.011141244	0	FALSE	NA	NA	NA	NA	NA	none	0	0	0
ENSG00000086570.12	-	FAT2	protein_coding	chr5	151565945	2	0.019109396	expressed	low	0	0.02556651	0.173281795	0	FALSE	NA	NA	NA	NA	NA	none	0.240678521	1	0
ENSG00000086589.12	-	RBM22	protein_coding	chr5	150698078	35	23.87544833	expressed	low	0	15.7234322	21.76300035	0	FALSE	NA	NA	NA	NA	NA	none	35.71631847	0	1
ENSG00000086598.11	+	TMED2	protein_coding	chr12	123581533	56	68.80065359	expressed	low	0	87.77383103	201.7577705	0	FALSE	NA	NA	NA	NA	NA	none	2.60769567	0	1
ENSG00000086619.14	-	ERO1B	protein_coding	chr1	236278959	34	3.4157759	expressed	low	0	2.275989617	4.062426731	0	FALSE	NA	NA	NA	NA	NA	none	37.55454743	0	1
ENSG00000086666.19	+	ZFAND6	protein_coding	chr15	80056568	46	20.39903766	expressed	low	0	12.14260498	15.04756024	0	FALSE	2	ENSG00000275460.1;ENSG00000086666.19	Metazoa_SRP;ZFAND6	misc_RNA;protein_coding	-;+	bidirectional	55.11848653	0	1
ENSG00000086696.11	+	HSD17B2	protein_coding	chr16	82032004	0	0.017374472	expressed	low	0	0	0.026364822	0	FALSE	NA	NA	NA	NA	NA	none	0.715407553	1	0
ENSG00000086712.13	+	TXLNG	protein_coding	chrX	16783432	46	18.45472362	expressed	low	0	3.246554511	5.554746755	0	FALSE	NA	NA	NA	NA	NA	none	23.60182123	0	1
ENSG00000086717.18	+	PPEF1	protein_coding	chrX	18672909	25	0.006204787	expressed	low	0	0.079901775	0.479881588	0	FALSE	NA	NA	NA	NA	NA	none	2.975341461	0	1
ENSG00000086730.17	+	LAT2	protein_coding	chr7	74196652	6	0.672528657	expressed	low	0	131.6333979	195.6477235	0	FALSE	NA	NA	NA	NA	NA	none	81.13019821	0	0
ENSG00000086758.16	-	HUWE1	protein_coding	chrX	53683729	41	20.64997846	expressed	low	0	6.161044317	8.144244387	0	FALSE	NA	NA	NA	NA	NA	none	35.22170541	0	1
ENSG00000086827.9	-	ZW10	protein_coding	chr11	113770736	39	30.93960268	expressed	low	0	3.941282683	9.24409348	0	FALSE	NA	NA	NA	NA	NA	none	0	0	1
ENSG00000086848.15	-	ALG9	protein_coding	chr11	111868582	31	1.271743527	expressed	low	0	6.741435744	9.165738336	0	FALSE	NA	NA	NA	NA	NA	none	16.32077843	0	1
ENSG00000086967.10	+	MYBPC2	protein_coding	chr19	50429892	14	0.049506294	expressed	low	0	0.20358843	0.263648218	0	FALSE	NA	NA	NA	NA	NA	none	15.53246277	0	1
ENSG00000086991.13	-	NOX4	protein_coding	chr11	89495188	0	0.004105964	expressed	low	0	0	0.047988159	0	FALSE	NA	NA	NA	NA	NA	none	0.601696302	0	0
ENSG00000087008.16	-	ACOX3	protein_coding	chr4	8437724	46	3.11223571	expressed	low	0	5.155413644	11.27721732	0	FALSE	NA	NA	NA	NA	NA	none	23.7287885	0	1
ENSG00000087053.18	-	MTMR2	protein_coding	chr11	95922316	51	11.93640802	expressed	low	0	3.969184604	4.708029911	0	FALSE	NA	NA	NA	NA	NA	none	22.51213987	0	1
ENSG00000087074.8	+	PPP1R15A	protein_coding	chr19	48869421	84	45.7327752	expressed	low	0	116.4667145	384.9509638	0	TRUE	NA	NA	NA	NA	NA	none	105.0201291	0	1
ENSG00000087076.9	-	HSD17B14	protein_coding	chr19	48833511	28	0	off	low	1	3.880538453	5.67089299	0	FALSE	NA	NA	NA	NA	NA	none	4.760546338	0	1
ENSG00000087077.14	+	TRIP6	protein_coding	chr7	100864387	50	58.95518713	expressed	low	0	59.65725537	89.69312376	0	FALSE	2	ENSG00000087077.14;ENSG00000283821.1	TRIP6;MIR6875	protein_coding;miRNA	+;+	nearby_same_strand	78.90236927	0	1
ENSG00000087085.15	-	ACHE	protein_coding	chr7	100893975	61	0.698491267	expressed	low	0	0.837273074	1.660983773	0	FALSE	NA	NA	NA	NA	NA	none	22.48562783	0	1
ENSG00000087086.15	+	FTL	protein_coding	chr19	48962309	97	1985.618528	expressed	low	0	1441.505763	1960.119041	0	TRUE	NA	NA	NA	NA	NA	none	99.82255163	0	1
ENSG00000087087.20	+	SRRT	protein_coding	chr7	100872103	50	36.36560316	expressed	low	0	70.84206767	121.4705386	0	FALSE	NA	NA	NA	NA	NA	none	160.6500075	0	1
ENSG00000087088.20	+	BAX	protein_coding	chr19	48951815	50	16.53154747	expressed	low	0	30.23898076	45.63087281	0	TRUE	NA	NA	NA	NA	NA	none	44.44909549	0	1
ENSG00000087095.13	+	NLK	protein_coding	chr17	28038737	29	26.13001399	expressed	low	0	38.13448084	57.44182611	0	FALSE	NA	NA	NA	NA	NA	none	35.90293783	0	1
ENSG00000087111.21	-	PIGS	protein_coding	chr17	28568795	32	23.6198686	expressed	low	0	90.60518699	292.6916105	0	FALSE	2	ENSG00000087111.21;ENSG00000265168.1	PIGS;AC005726.4	protein_coding;lncRNA	-;+	bidirectional	3.811088274	0	1
ENSG00000087116.16	-	ADAMTS2	protein_coding	chr5	179342462	0	0.00286034	expressed	low	0	0	0	0	FALSE	NA	NA	NA	NA	NA	none	0.12033926	1	0
ENSG00000087128.10	+	TMPRSS11E	protein_coding	chr4	68444463	0	0.011790147	expressed	low	0	0	0	0	FALSE	NA	NA	NA	NA	NA	none	0	0	0
ENSG00000087152.15	-	ATXN7L3	protein_coding	chr17	44197114	24	20.51350545	expressed	low	0	22.95503595	54.69928677	0	FALSE	NA	NA	NA	NA	NA	none	2.975341461	0	1
ENSG00000087157.19	+	PGS1	protein_coding	chr17	78375649	35	9.153630705	expressed	low	0	2.452012068	5.182721153	0	FALSE	NA	NA	NA	NA	NA	none	35.14113421	0	1
ENSG00000087191.13	+	PSMC5	protein_coding	chr17	63824152	46	11.20849901	expressed	low	0	86.80049227	239.9952867	0	TRUE	NA	NA	NA	NA	NA	none	26.32219307	0	1
ENSG00000087206.17	-	UIMC1	protein_coding	chr5	177019634	35	13.18946353	expressed	low	0	4.226915613	8.493904112	0	FALSE	2	ENSG00000087206.17;ENSG00000113761.12	UIMC1;ZNF346	protein_coding;protein_coding	-;+	bidirectional	0	0	1
ENSG00000087237.12	+	CETP	protein_coding	chr16	56958923	27	0.021197866	expressed	low	0	0	0.124360002	0	FALSE	NA	NA	NA	NA	NA	none	1.190136584	1	1
ENSG00000087245.13	+	MMP2	protein_coding	chr16	55386700	0	0.00532135	expressed	low	0	0	0	0	FALSE	NA	NA	NA	NA	NA	none	0.361017781	1	0
ENSG00000087250.8	+	MT3	protein_coding	chr16	56586074	0	0	off	low	0	0	0.041453334	0	FALSE	NA	NA	NA	NA	NA	none	22.62378096	1	0
ENSG00000087253.13	+	LPCAT2	protein_coding	chr16	55506072	6	4.55116203	expressed	low	0	1.422868744	3.109000049	0	FALSE	NA	NA	NA	NA	NA	none	6.104162233	1	0
ENSG00000087258.15	+	GNAO1	protein_coding	chr16	56188489	11	0.034588459	expressed	low	0	0.2110009	0.672575702	0	FALSE	2	ENSG00000246379.8;ENSG00000087258.15	AC040168.1;GNAO1	lncRNA;protein_coding	-;+	bidirectional	0	1	0
ENSG00000087263.17	+	OGFOD1	protein_coding	chr16	56448521	41	18.92539106	expressed	low	0	47.62414516	72.29461448	0	FALSE	NA	NA	NA	NA	NA	none	0.835746813	0	1
ENSG00000087266.17	+	SH3BP2	protein_coding	chr4	2790071	24	2.340582363	expressed	low	0	0.944328017	2.639348735	0	FALSE	NA	NA	NA	NA	NA	none	20.70042296	0	1
ENSG00000087269.16	-	NOP14	protein_coding	chr4	2960407	35	39.57556214	expressed	low	0	18.30367229	20.68521366	0	FALSE	2	ENSG00000087269.16;ENSG00000125388.20	NOP14;GRK4	protein_coding;protein_coding	-;+	bidirectional	0.12033926	0	1
ENSG00000087274.17	+	ADD1	protein_coding	chr4	2840857	38	14.91430482	expressed	low	0	8.053008037	11.14779551	0	FALSE	NA	NA	NA	NA	NA	none	63.06854081	0	1
ENSG00000087299.12	-	L2HGDH	protein_coding	chr14	50309230	30	3.324148632	expressed	low	0	5.567776616	5.936347981	0	FALSE	2	ENSG00000087299.12;ENSG00000125375.15	L2HGDH;DMAC2L	protein_coding;protein_coding	-;+	bidirectional	0	0	1
ENSG00000087301.9	-	TXNDC16	protein_coding	chr14	52549523	29	4.451132406	expressed	low	0	1.946805405	3.316266719	0	FALSE	2	ENSG00000087301.9;ENSG00000180998.12	TXNDC16;GPR137C	protein_coding;protein_coding	-;+	bidirectional	0.12033926	0	1
ENSG00000087302.9	+	RTRAF	protein_coding	chr14	51986514	26	13.24382012	expressed	low	0	26.1475782	33.06384143	0	FALSE	NA	NA	NA	NA	NA	none	3.202763962	0	1
ENSG00000087303.18	-	NID2	protein_coding	chr14	52066229	0	0.04055706	expressed	low	0	0	0.026364822	0	FALSE	NA	NA	NA	NA	NA	none	0.601696302	1	0
ENSG00000087338.5	+	GMCL1	protein_coding	chr2	69826660	39	11.63749181	expressed	low	0	8.715051225	12.10437353	0	FALSE	NA	NA	NA	NA	NA	none	35.34204467	0	1
ENSG00000087365.16	+	SF3B2	protein_coding	chr11	66047729	36	29.76614454	expressed	low	0	16.36457712	30.87320633	0	FALSE	2	ENSG00000175229.7;ENSG00000087365.16	GAL3ST3;SF3B2	protein_coding;protein_coding	-;+	bidirectional	24.83172587	0	1
ENSG00000087448.11	+	KLHL42	protein_coding	chr12	27777048	23	3.077890545	expressed	low	0	5.5869122	11.32520548	0	FALSE	NA	NA	NA	NA	NA	none	0.240678521	0	1
ENSG00000087460.25	+	GNAS	protein_coding	chr20	58836718	1	14.02683339	expressed	low	0	1.487092075	1.676940307	0	FALSE	NA	NA	NA	NA	NA	none	5.31584657	1	0
ENSG00000087470.18	+	DNM1L	protein_coding	chr12	32676200	26	25.87902166	expressed	low	0	8.098596901	13.18216021	0	FALSE	NA	NA	NA	NA	NA	none	37.36689299	0	1
ENSG00000087494.16	-	PTHLH	protein_coding	chr12	27969734	23	0.281524591	expressed	low	0	0.42626308	0.671834224	0	FALSE	NA	NA	NA	NA	NA	none	2.273189928	1	1
ENSG00000087495.17	+	PHACTR3	protein_coding	chr20	59574509	0	0.011778136	expressed	low	0	0	0	0	FALSE	NA	NA	NA	NA	NA	none	0.240678521	1	0
ENSG00000087502.18	-	ERGIC2	protein_coding	chr12	29378190	31	13.54963724	expressed	low	0	2.449383705	9.261714653	0	FALSE	NA	NA	NA	NA	NA	none	9.901994487	0	1
ENSG00000087510.7	+	TFAP2C	protein_coding	chr20	56626306	3	0.031216055	expressed	low	0	0	0.011141244	0	FALSE	NA	NA	NA	NA	NA	none	0.481357042	1	0
ENSG00000087586.17	-	AURKA	protein_coding	chr20	56389338	55	66.51300134	expressed	low	0	20.00296162	29.6391338	0	FALSE	2	ENSG00000087586.17;ENSG00000101138.12	AURKA;CSTF1	protein_coding;protein_coding	-;+	bidirectional	0.12033926	0	1
ENSG00000087589.16	+	CASS4	protein_coding	chr20	56409112	72	10.86116845	expressed	low	0	4.047280177	10.28336784	0	TRUE	NA	NA	NA	NA	NA	none	31.00423837	0	1
ENSG00000087842.11	-	PIR	protein_coding	chrX	15490565	31	10.65115171	expressed	low	0	3.39623056	6.093640097	0	FALSE	NA	NA	NA	NA	NA	none	3.697377024	0	1
ENSG00000087884.14	+	AAMDC	protein_coding	chr11	77818109	46	5.279664129	expressed	low	0	14.22059879	17.83670761	0	FALSE	2	ENSG00000048649.13;ENSG00000087884.14	RSF1;AAMDC	protein_coding;protein_coding	-;+	bidirectional	0	0	1
ENSG00000087903.13	-	RFX2	protein_coding	chr19	6196573	23	1.841678422	expressed	low	0	1.642917033	2.4473961	0	FALSE	NA	NA	NA	NA	NA	none	14.72985601	0	1
ENSG00000087995.15	+	METTL2A	protein_coding	chr17	62420867	47	24.31888288	expressed	low	0	21.90184899	43.19437402	0	FALSE	NA	NA	NA	NA	NA	none	24.2499136	0	1
ENSG00000088002.11	+	SULT2B1	protein_coding	chr19	48549075	40	0.109612074	expressed	low	0	0.049226944	0.115521197	0	FALSE	NA	NA	NA	NA	NA	none	0.481357042	1	0
ENSG00000088035.18	+	ALG6	protein_coding	chr1	63364575	22	4.420639446	expressed	low	0	1.387087713	2.197026702	0	FALSE	NA	NA	NA	NA	NA	none	58.29577353	0	1
ENSG00000088038.19	+	CNOT3	protein_coding	chr19	54134749	12	1.562073354	expressed	low	0	5.036827586	14.59559156	0	FALSE	NA	NA	NA	NA	NA	none	4.693231157	0	1
ENSG00000088053.11	-	GP6	protein_coding	chr19	55035265	0	3.496995225	expressed	low	0	9.827482822	15.0015836	0	TRUE	NA	NA	NA	NA	NA	none	6.405527924	0	1
ENSG00000088179.9	+	PTPN4	protein_coding	chr2	119756922	51	4.871915079	expressed	low	0	2.125679421	6.95828303	0	FALSE	NA	NA	NA	NA	NA	none	28.87686466	0	1
ENSG00000088205.13	+	DDX18	protein_coding	chr2	117811691	31	42.14536285	expressed	low	0	42.6924019	136.1994912	0	FALSE	NA	NA	NA	NA	NA	none	13.73296679	0	1
ENSG00000088247.17	-	KHSRP	protein_coding	chr19	6421795	46	30.89986559	expressed	low	0	31.01480826	48.93660805	0	FALSE	NA	NA	NA	NA	NA	none	58.04639684	0	1
ENSG00000088256.9	+	GNA11	protein_coding	chr19	3091362	16	5.904852031	expressed	low	0	2.786065844	3.901993626	0	FALSE	NA	NA	NA	NA	NA	none	27.83357937	0	1
ENSG00000088280.19	-	ASAP3	protein_coding	chr1	23481569	0	13.46111958	expressed	low	0	1.885531321	2.975265847	0	FALSE	NA	NA	NA	NA	NA	none	29.61215624	0	1
ENSG00000088298.13	-	EDEM2	protein_coding	chr20	35144337	50	15.63296422	expressed	low	0	3.751637276	6.831979028	0	FALSE	NA	NA	NA	NA	NA	none	17.39720377	0	1
ENSG00000088305.18	+	DNMT3B	protein_coding	chr20	32759385	42	28.54591459	expressed	low	0	4.253504572	9.227687629	0	FALSE	NA	NA	NA	NA	NA	none	55.44636426	0	1
ENSG00000088320.4	+	REM1	protein_coding	chr20	31472288	10	0	off	low	1	0.023256239	0.080709084	0	FALSE	NA	NA	NA	NA	NA	none	0	1	0
ENSG00000088325.16	+	TPX2	protein_coding	chr20	31736271	40	98.34276801	expressed	low	0	23.36225099	34.11607941	0	FALSE	NA	NA	NA	NA	NA	none	29.0788102	0	1
ENSG00000088356.6	-	PDRG1	protein_coding	chr20	31949047	39	19.27720688	expressed	low	0	9.81657295	52.33110223	0	FALSE	NA	NA	NA	NA	NA	none	20.23128686	0	1
ENSG00000088367.23	+	EPB41L1	protein_coding	chr20	36088504	22	0.116179473	expressed	low	0	0.07669953	0.372653402	0	FALSE	NA	NA	NA	NA	NA	none	7.300926827	0	1
ENSG00000088386.17	-	SLC15A1	protein_coding	chr13	98749673	0	0.005948283	expressed	low	0	0.032960526	0.173281795	0	FALSE	NA	NA	NA	NA	NA	none	0.842374823	1	0
ENSG00000088387.19	-	DOCK9	protein_coding	chr13	99083626	18	3.649543017	expressed	low	0	2.741379675	5.038756677	0	FALSE	2	ENSG00000088387.19;ENSG00000260992.1	DOCK9;DOCK9-DT	protein_coding;lncRNA	-;+	bidirectional	0.722035563	0	1
ENSG00000088448.14	-	ANKRD10	protein_coding	chr13	110912070	32	20.94420867	expressed	low	0	12.01533404	19.56597364	0	FALSE	2	ENSG00000088448.14;ENSG00000277767.1	ANKRD10;AL442128.2	protein_coding;lncRNA	-;+	bidirectional	2.259933909	0	1
ENSG00000088451.11	-	TGDS	protein_coding	chr13	94593243	18	11.88206592	expressed	low	0	3.118526821	4.724848393	0	FALSE	NA	NA	NA	NA	NA	none	16.45437371	0	1
ENSG00000088538.13	+	DOCK3	protein_coding	chr3	50671927	2	0.091535452	expressed	low	0	0	0.047988159	0	FALSE	2	ENSG00000088538.13;ENSG00000272543.1	DOCK3;MIR4787	protein_coding;miRNA	+;+	nearby_same_strand	1.203392604	1	0
ENSG00000088543.15	-	C3orf18	protein_coding	chr3	50568028	55	0.893927064	expressed	low	0	8.237914245	12.85053354	0	FALSE	NA	NA	NA	NA	NA	none	9.407381425	0	1
ENSG00000088682.14	+	COQ9	protein_coding	chr16	57444425	28	20.01202472	expressed	low	0	11.89379665	18.73690696	0	FALSE	2	ENSG00000005194.15;ENSG00000088682.14	CIAPIN1;COQ9	protein_coding;protein_coding	-;+	bidirectional	0	0	1
ENSG00000088726.16	-	TMEM40	protein_coding	chr3	12766458	5	0.037977363	expressed	low	0	0.044956659	0.558980102	0	FALSE	NA	NA	NA	NA	NA	none	0.595068292	1	0
ENSG00000088727.12	-	KIF9	protein_coding	chr3	47280452	46	3.066128517	expressed	low	0	12.89655847	20.20301487	0	FALSE	NA	NA	NA	NA	NA	none	1.303847835	0	1
ENSG00000088756.12	+	ARHGAP28	protein_coding	chr18	6726718	18	0.856492264	expressed	low	0	1.875016805	3.551123753	0	FALSE	NA	NA	NA	NA	NA	none	0.12033926	0	1
ENSG00000088766.12	+	CRLS1	protein_coding	chr20	6003093	32	2.456539155	expressed	low	0	10.43029927	14.30140023	0	FALSE	2	ENSG00000278719.1;ENSG00000088766.12	MCM8-AS1;CRLS1	lncRNA;protein_coding	-;+	bidirectional	0.12033926	0	1
ENSG00000088782.5	+	DEFB127	protein_coding	chr20	154454	0	0	off	low	0	0	0.057760598	0	FALSE	NA	NA	NA	NA	NA	none	0	1	0
ENSG00000088808.18	-	PPP1R13B	protein_coding	chr14	103844576	5	0.02218751	expressed	low	0	0.012114996	0.082906668	0	FALSE	2	ENSG00000088808.18;ENSG00000258735.1	PPP1R13B;LINC00637	protein_coding;lncRNA	-;+	bidirectional	0	1	0
ENSG00000088812.18	+	ATRN	protein_coding	chr20	3468018	33	5.682173924	expressed	low	0	2.057983784	3.427426834	0	FALSE	NA	NA	NA	NA	NA	none	24.78429472	0	1
ENSG00000088826.18	+	SMOX	protein_coding	chr20	4117980	23	5.250903185	expressed	low	0	0.179804248	0.316377862	0	FALSE	NA	NA	NA	NA	NA	none	0.12033926	0	1
ENSG00000088827.12	-	SIGLEC1	protein_coding	chr20	3704129	2	0	off	low	0	0	0.053806056	0	FALSE	NA	NA	NA	NA	NA	none	0.240678521	1	0
ENSG00000088832.17	-	FKBP1A	protein_coding	chr20	1390173	21	18.42228087	expressed	low	0	9.004383198	38.12353232	0	FALSE	3	ENSG00000274322.1;ENSG00000284436.1;ENSG00000088832.17	AL136531.2;MIR6869;FKBP1A	protein_coding;miRNA;protein_coding	-;-;-	multiple_nearby_promoters	0	0	1
ENSG00000088833.17	-	NSFL1C	protein_coding	chr20	1470843	6	9.93695223	expressed	low	0	0.173524167	0.346563591	0	FALSE	NA	NA	NA	NA	NA	none	0.601696302	1	0
ENSG00000088836.14	-	SLC4A11	protein_coding	chr20	3236560	7	0.213144139	expressed	low	0	0.168394401	0.322836337	0	FALSE	2	ENSG00000088836.14;ENSG00000277287.1	SLC4A11;AL109976.1	protein_coding;lncRNA	-;+	bidirectional	0	1	0
ENSG00000088854.12	-	C20orf194	protein_coding	chr20	3404626	21	1.969766049	expressed	low	0	0.87324795	1.103727653	0	FALSE	NA	NA	NA	NA	NA	none	13.73296679	0	1
ENSG00000088876.12	-	ZNF343	protein_coding	chr20	2521703	45	3.308243312	expressed	low	0	0.164268411	1.202146686	0	FALSE	NA	NA	NA	NA	NA	none	39.641118	0	1
ENSG00000088881.20	+	EBF4	protein_coding	chr20	2689878	4	0.00586425	expressed	low	0	0.037681506	0.289672333	0	FALSE	NA	NA	NA	NA	NA	none	0.956086074	1	0
ENSG00000088882.8	-	CPXM1	protein_coding	chr20	2797628	17	0.394273491	expressed	low	0	0.473796579	2.239389963	0	FALSE	NA	NA	NA	NA	NA	none	1.430815105	1	1
ENSG00000088888.18	+	MAVS	protein_coding	chr20	3843799	37	10.42154728	expressed	low	0	3.510807187	4.233672566	0	FALSE	NA	NA	NA	NA	NA	none	64.35250461	0	1
ENSG00000088899.15	-	LZTS3	protein_coding	chr20	3170593	39	0.863393925	expressed	low	0	1.806471188	3.743457848	0	FALSE	NA	NA	NA	NA	NA	none	19.73667379	0	1
ENSG00000088926.13	+	F11	protein_coding	chr4	186262945	2	0.007444195	expressed	low	0	0	0	0	FALSE	NA	NA	NA	NA	NA	none	0	1	0
ENSG00000088930.8	+	XRN2	protein_coding	chr20	21300331	37	60.32510167	expressed	low	0	7.562857212	16.21999768	0	FALSE	NA	NA	NA	NA	NA	none	0.474729032	0	1
ENSG00000088970.16	+	KIZ	protein_coding	chr20	21122983	18	4.063659948	expressed	low	0	1.597766393	8.571028235	0	FALSE	NA	NA	NA	NA	NA	none	15.0169306	0	1
ENSG00000088986.11	+	DYNLL1	protein_coding	chr12	120466850	41	35.47268457	expressed	low	0	48.97524892	74.97325684	0	FALSE	2	ENSG00000111786.9;ENSG00000088986.11	SRSF9;DYNLL1	protein_coding;protein_coding	-;+	bidirectional	0.361017781	0	1
ENSG00000088992.18	-	TESC	protein_coding	chr12	117096480	29	10.40380413	expressed	low	0	2.331815943	3.559250943	0	FALSE	2	ENSG00000088992.18;ENSG00000258285.1	TESC;TESC-AS1	protein_coding;lncRNA	-;+	bidirectional	0	1	1
ENSG00000089006.16	-	SNX5	protein_coding	chr20	17965981	64	31.32648632	expressed	low	0	60.3160678	85.37093455	0	TRUE	2	ENSG00000089006.16;ENSG00000125871.14	SNX5;MGME1	protein_coding;protein_coding	-;+	bidirectional	0.234050511	0	1
ENSG00000089009.15	-	RPL6	protein_coding	chr12	112415839	55	389.8105651	expressed	low	0	8.465293515	16.5813336	0	FALSE	NA	NA	NA	NA	NA	none	0.240678521	0	1
ENSG00000089012.14	-	SIRPG	protein_coding	chr20	1654780	1	0	off	low	0	0	0	0	FALSE	NA	NA	NA	NA	NA	none	0	0	0
ENSG00000089022.14	+	MAPKAPK5	protein_coding	chr12	111839228	44	6.501814527	expressed	low	0	36.20613546	53.88933419	0	FALSE	NA	NA	NA	NA	NA	none	1.444071125	0	1
ENSG00000089041.17	+	P2RX7	protein_coding	chr12	121129819	17	0.511255629	expressed	low	0	0.297637445	1.676940307	0	FALSE	NA	NA	NA	NA	NA	none	0.601696302	0	0
ENSG00000089048.14	-	ESF1	protein_coding	chr20	13781887	36	14.31367066	expressed	low	0	15.26957754	29.84863479	0	FALSE	2	ENSG00000089048.14;ENSG00000101247.18	ESF1;NDUFAF5	protein_coding;protein_coding	-;+	bidirectional	0.354389771	0	1
ENSG00000089050.16	-	RBBP9	protein_coding	chr20	18494226	9	1.46428639	expressed	low	0	0.538730397	1.007751335	0	FALSE	NA	NA	NA	NA	NA	none	3.443442483	0	0
ENSG00000089053.13	-	ANAPC5	protein_coding	chr12	121396897	46	35.9486221	expressed	low	0	5.00444164	13.76250689	0	FALSE	2	ENSG00000089053.13;ENSG00000170633.16	ANAPC5;RNF34	protein_coding;protein_coding	-;+	bidirectional	0	0	1
ENSG00000089057.15	-	SLC23A2	protein_coding	chr20	5007294	1	2.611008669	expressed	low	0	0.030163379	0.0621089	0	FALSE	NA	NA	NA	NA	NA	none	0.708779543	1	0
ENSG00000089060.11	-	SLC8B1	protein_coding	chr12	113356494	35	8.170007832	expressed	low	0	3.252380301	6.94098124	0	FALSE	NA	NA	NA	NA	NA	none	1.791832887	0	1
ENSG00000089063.15	-	TMEM230	protein_coding	chr20	5110104	30	17.62423582	expressed	low	0	97.73732294	146.4118726	0	FALSE	2	ENSG00000089063.15;ENSG00000252367.1	TMEM230;Y_RNA	protein_coding;misc_RNA	-;-	nearby_same_strand	94.77948855	0	1
ENSG00000089091.16	-	DZANK1	protein_coding	chr20	18464282	20	0.078332294	expressed	low	0	2.746558164	5.566626424	0	FALSE	2	ENSG00000089091.16;ENSG00000132664.12	DZANK1;POLR3F	protein_coding;protein_coding	-;+	bidirectional	0	0	1
ENSG00000089094.19	-	KDM2B	protein_coding	chr12	121578024	46	4.745720488	expressed	low	0	4.184554402	7.080414629	0	FALSE	NA	NA	NA	NA	NA	none	0	0	1
ENSG00000089101.18	+	CFAP61	protein_coding	chr20	20049514	29	0.009379217	expressed	low	0	5.926693222	19.2342793	0	FALSE	NA	NA	NA	NA	NA	none	4.071650825	0	1
ENSG00000089116.4	-	LHX5	protein_coding	chr12	113469281	1	0.014232724	expressed	low	0	0.005570622	0.060574979	0	FALSE	NA	NA	NA	NA	NA	none	0	1	0
ENSG00000089123.16	-	TASP1	protein_coding	chr20	13635933	23	5.531668105	expressed	low	0	0.634902272	1.370372962	0	FALSE	NA	NA	NA	NA	NA	none	8.257012901	0	1
ENSG00000089127.13	+	OAS1	protein_coding	chr12	112903783	1	0.0189596	expressed	low	0	0	0.095976318	0	FALSE	NA	NA	NA	NA	NA	none	0.12033926	0	0
ENSG00000089154.11	-	GCN1	protein_coding	chr12	120191716	57	54.01820353	expressed	low	0	1248.570338	3049.547773	0	FALSE	NA	NA	NA	NA	NA	none	321.839989	0	1
ENSG00000089157.16	-	RPLP0	protein_coding	chr12	120198236	62	1070.349613	expressed	low	0	3156.683262	5925.347852	0	FALSE	2	ENSG00000089157.16;ENSG00000255857.6	RPLP0;PXN-AS1	protein_coding;lncRNA	-;+	bidirectional	1.551154366	0	1
ENSG00000089159.16	-	PXN	protein_coding	chr12	120262772	18	3.045463384	expressed	low	0	1.987372998	7.540339034	0	FALSE	NA	NA	NA	NA	NA	none	37.16701761	0	1
ENSG00000089163.4	+	SIRT4	protein_coding	chr12	120299316	32	2.825824623	expressed	low	0	1.185613314	2.155573368	0	FALSE	NA	NA	NA	NA	NA	none	2.373645159	0	1
ENSG00000089169.15	+	RPH3A	protein_coding	chr12	112567380	1	0.002121197	expressed	low	0	0.005570622	0.186326701	0	FALSE	NA	NA	NA	NA	NA	none	0.595068292	1	0
ENSG00000089177.18	-	KIF16B	protein_coding	chr20	16570435	35	4.555673247	expressed	low	0	1.812623502	3.215206641	0	FALSE	NA	NA	NA	NA	NA	none	2.500612429	0	1
ENSG00000089195.15	-	TRMT6	protein_coding	chr20	5947559	30	8.973751834	expressed	low	0	17.71822021	31.91212562	0	FALSE	3	ENSG00000089195.15;ENSG00000125885.13;ENSG00000286235.1	TRMT6;MCM8;AL035461.3	protein_coding;protein_coding;protein_coding	-;+;+	multiple_nearby_promoters	0	0	1
ENSG00000089199.10	+	CHGB	protein_coding	chr20	5908510	14	0.025967349	expressed	low	0	0	0.0621089	0	FALSE	NA	NA	NA	NA	NA	none	0.481357042	1	0
ENSG00000089220.5	+	PEBP1	protein_coding	chr12	118133124	32	219.471429	expressed	low	0	52.97968082	89.82937476	0	FALSE	2	ENSG00000176834.14;ENSG00000089220.5	VSIG10;PEBP1	protein_coding;protein_coding	-;+	bidirectional	0.481357042	0	1
ENSG00000089225.19	-	TBX5	protein_coding	chr12	114405443	0	0	off	low	0	0	0	0	FALSE	NA	NA	NA	NA	NA	none	0	1	0
ENSG00000089234.16	-	BRAP	protein_coding	chr12	111682957	50	18.85160465	expressed	low	0	9.572347051	18.86126697	0	FALSE	2	ENSG00000089234.16;ENSG00000111271.14	BRAP;ACAD10	protein_coding;protein_coding	-;+	bidirectional	0	0	1
ENSG00000089248.7	+	ERP29	protein_coding	chr12	112010348	64	57.9060876	expressed	low	0	44.62231564	59.41625209	0	FALSE	2	ENSG00000198270.13;ENSG00000089248.7	TMEM116;ERP29	protein_coding;protein_coding	-;+	bidirectional	0.481357042	0	1
ENSG00000089250.19	-	NOS1	protein_coding	chr12	117449171	3	0.001662275	expressed	low	0	0	0.041453334	0	FALSE	2	ENSG00000089250.19;ENSG00000255686.1	NOS1;AC073864.1	protein_coding;lncRNA	-;+	bidirectional	0	0	0
ENSG00000089280.18	+	FUS	protein_coding	chr16	31177110	49	9.909774622	expressed	low	0	99.52167643	207.1872668	0	FALSE	NA	NA	NA	NA	NA	none	14.73648402	0	1
ENSG00000089289.16	+	IGBP1	protein_coding	chrX	70130447	36	44.03327489	expressed	low	0	36.30577327	65.77332537	0	FALSE	NA	NA	NA	NA	NA	none	11.82742265	0	1
ENSG00000089327.15	+	FXYD5	protein_coding	chr19	35151730	44	21.72493571	expressed	low	0	51.70931399	188.5005123	0	FALSE	NA	NA	NA	NA	NA	none	65.44984906	0	1
ENSG00000089335.21	+	ZNF302	protein_coding	chr19	34674639	11	0.171882323	expressed	low	0	0.458073967	1.180069105	0	FALSE	3	ENSG00000205209.7;ENSG00000279329.1;ENSG00000089335.21	SCGB2B2;AC020910.6;ZNF302	protein_coding;TEC;protein_coding	-;-;+	multiple_nearby_promoters	1.203392604	1	0
ENSG00000089351.14	+	GRAMD1A	protein_coding	chr19	34991784	2	5.406615105	expressed	low	0	0.01162812	0.131824109	0	FALSE	NA	NA	NA	NA	NA	none	0	0	0
ENSG00000089356.18	+	FXYD3	protein_coding	chr19	35112879	10	0	off	low	1	0.019239909	0.057760598	0	FALSE	NA	NA	NA	NA	NA	none	0.601696302	1	0
ENSG00000089472.16	+	HEPH	protein_coding	chrX	66159549	37	39.91103472	expressed	low	0	16.87715314	39.54224287	0	FALSE	NA	NA	NA	NA	NA	none	10.31044342	0	1
ENSG00000089486.17	-	CDIP1	protein_coding	chr16	4535829	12	0.280598829	expressed	low	0	0.019239909	0.115521197	0	FALSE	NA	NA	NA	NA	NA	none	0.842374823	1	0
ENSG00000089505.17	+	CMTM1	protein_coding	chr16	66563393	8	1.137719953	expressed	low	0	21.60925898	34.07464054	0	FALSE	2	ENSG00000277978.1;ENSG00000089505.17	AC010542.5;CMTM1	lncRNA;protein_coding	-;+	bidirectional	0.949458064	0	0
ENSG00000089558.9	-	KCNH4	protein_coding	chr17	42178143	48	0.398016921	expressed	low	0	1.12894309	2.599226932	0	FALSE	NA	NA	NA	NA	NA	none	6.699230525	0	1
ENSG00000089597.18	-	GANAB	protein_coding	chr11	62643727	37	82.52022563	expressed	low	0	47.44102886	60.3691038	0	FALSE	NA	NA	NA	NA	NA	none	178.8253761	0	1
ENSG00000089639.11	-	GMIP	protein_coding	chr19	19640658	16	3.623290402	expressed	low	0	18.56021797	32.74510867	0	FALSE	NA	NA	NA	NA	NA	none	63.6116201	0	1
ENSG00000089682.16	-	RBM41	protein_coding	chrX	107115824	7	8.486301489	expressed	low	0	35.90786185	99.54892115	0	FALSE	NA	NA	NA	NA	NA	none	18.23398566	0	1
ENSG00000089685.15	+	BIRC5	protein_coding	chr17	78211186	25	57.68155762	expressed	low	0	42.0792637	66.53260106	0	FALSE	NA	NA	NA	NA	NA	none	39.04811987	0	1
ENSG00000089692.9	+	LAG3	protein_coding	chr12	6769512	7	0.078759216	expressed	low	0	42.60552654	120.4717597	0	FALSE	NA	NA	NA	NA	NA	none	36.61275246	0	0
ENSG00000089693.10	-	MLF2	protein_coding	chr12	6764476	70	19.72460812	expressed	low	0	29.05496983	92.2235802	0	FALSE	NA	NA	NA	NA	NA	none	4.760546338	0	1
ENSG00000089723.10	+	OTUB2	protein_coding	chr14	94023340	0	0.439268212	expressed	low	0	0.016711865	0.080709084	0	FALSE	NA	NA	NA	NA	NA	none	0.354389771	1	0
ENSG00000089737.17	-	DDX24	protein_coding	chr14	94078213	0	22.07825123	expressed	low	0	41.08888038	69.22706777	0	FALSE	2	ENSG00000089737.17;ENSG00000165948.11	DDX24;IFI27L1	protein_coding;protein_coding	-;+	bidirectional	0	0	1
ENSG00000089775.11	-	ZBTB25	protein_coding	chr14	64502214	37	0.656177912	expressed	low	0	5.39267935	7.936393278	0	FALSE	NA	NA	NA	NA	NA	none	2.032511408	0	1
ENSG00000089818.18	+	NECAP1	protein_coding	chr12	8073939	5	4.665099172	expressed	low	0	0.02556651	0.143964476	0	FALSE	NA	NA	NA	NA	NA	none	0.234050511	0	0
ENSG00000089820.15	-	ARHGAP4	protein_coding	chrX	153932000	18	21.69785983	expressed	low	0	56.42398512	82.07781046	0	FALSE	2	ENSG00000089820.15;ENSG00000102030.16	ARHGAP4;NAA10	protein_coding;protein_coding	-;-	nearby_same_strand	0.835746813	0	1
ENSG00000089847.12	+	ANKRD24	protein_coding	chr19	4180354	42	0.094223786	expressed	low	0	4.400396107	5.407508641	0	FALSE	2	ENSG00000077463.15;ENSG00000089847.12	SIRT6;ANKRD24	protein_coding;protein_coding	-;+	bidirectional	1.069797324	0	1
ENSG00000089876.12	-	DHX32	protein_coding	chr10	125893437	26	14.05057855	expressed	low	0	2.017708606	4.642773407	0	FALSE	2	ENSG00000089876.12;ENSG00000203780.10	DHX32;FANK1	protein_coding;protein_coding	-;+	bidirectional	0.240678521	0	1
ENSG00000089902.10	+	RCOR1	protein_coding	chr14	102589649	40	12.50120884	expressed	low	0	6.464160476	18.93973176	0	FALSE	NA	NA	NA	NA	NA	none	95.50359428	0	1
ENSG00000089916.18	+	GPATCH2L	protein_coding	chr14	76148916	24	3.539437264	expressed	low	0	17.47512936	21.11702609	0	FALSE	NA	NA	NA	NA	NA	none	0	0	1
ENSG00000090006.17	+	LTBP4	protein_coding	chr19	40589883	12	4.466182929	expressed	low	0	11.95687552	26.07480876	0	FALSE	NA	NA	NA	NA	NA	none	19.42971517	0	1
ENSG00000090013.11	-	BLVRB	protein_coding	chr19	40462765	84	210.9714557	expressed	low	0	65.42321496	89.45629476	0	FALSE	2	ENSG00000090013.11;ENSG00000160460.16	BLVRB;SPTBN4	protein_coding;protein_coding	-;+	bidirectional	2.259933909	0	1
ENSG00000090020.11	-	SLC9A1	protein_coding	chr1	27163982	18	1.205027734	expressed	low	0	0.043009154	0.143964476	0	FALSE	NA	NA	NA	NA	NA	none	0.240678521	0	0
ENSG00000090054.15	-	SPTLC1	protein_coding	chr9	92112414	42	21.3536129	expressed	low	0	9.652779514	17.41040028	0	FALSE	NA	NA	NA	NA	NA	none	21.15423288	0	1
ENSG00000090060.18	+	PAPOLA	protein_coding	chr14	96498433	48	12.97642776	expressed	low	0	9.913786734	19.74725153	0	FALSE	NA	NA	NA	NA	NA	none	1.317103855	0	1
ENSG00000090061.17	+	CCNK	protein_coding	chr14	99478169	31	0.726502415	expressed	low	0	5.898452353	9.623159956	0	FALSE	2	ENSG00000183576.13;ENSG00000090061.17	SETD3;CCNK	protein_coding;protein_coding	-;+	bidirectional	0.354389771	0	1
ENSG00000090097.21	-	PCBP4	protein_coding	chr3	51971017	39	1.400832208	expressed	low	0	18.77638529	24.12381195	0	FALSE	3	ENSG00000090097.21;ENSG00000272762.5;ENSG00000114786.16	PCBP4;AC115284.1;ABHD14A-ACY1	protein_coding;lncRNA;protein_coding	-;-;+	multiple_nearby_promoters	0	0	1
ENSG00000090104.12	+	RGS1	protein_coding	chr1	192572763	2	0.012293703	expressed	low	0	0	0.095976318	0	FALSE	NA	NA	NA	NA	NA	none	0.240678521	0	0
ENSG00000090238.12	-	YPEL3	protein_coding	chr16	30093916	38	1.445361828	expressed	low	0	5.449562546	29.06696532	0	FALSE	NA	NA	NA	NA	NA	none	0.822490793	0	1
ENSG00000090263.16	-	MRPS33	protein_coding	chr7	141012229	61	15.17321862	expressed	low	0	13.82749738	26.32675861	0	FALSE	NA	NA	NA	NA	NA	none	30.61567346	0	1
ENSG00000090266.13	+	NDUFB2	protein_coding	chr7	140687777	1	33.13610885	expressed	low	0	4.837330113	7.198223824	0	FALSE	NA	NA	NA	NA	NA	none	8.718485913	0	0
ENSG00000090273.14	+	NUDC	protein_coding	chr1	26897238	34	82.0667875	expressed	low	0	11.40416008	15.94192518	0	FALSE	NA	NA	NA	NA	NA	none	1.317103855	0	1
ENSG00000090316.16	+	MAEA	protein_coding	chr4	1286887	33	10.1478645	expressed	low	0	8.933701021	11.15094684	0	FALSE	NA	NA	NA	NA	NA	none	63.09401776	0	1
ENSG00000090339.9	+	ICAM1	protein_coding	chr19	10268093	54	11.76428244	expressed	low	0	4.267275976	5.854555377	0	FALSE	NA	NA	NA	NA	NA	none	35.07485411	0	1
ENSG00000090372.15	-	STRN4	protein_coding	chr19	46743995	18	12.48928165	expressed	low	0	10.3580236	16.08620517	0	FALSE	NA	NA	NA	NA	NA	none	2.233421869	0	1
ENSG00000090376.11	+	IRAK3	protein_coding	chr12	66186195	1	0.004834815	expressed	low	0	0	0	0	FALSE	NA	NA	NA	NA	NA	none	0.361017781	1	0
ENSG00000090382.6	+	LYZ	protein_coding	chr12	69345341	12	84.14250184	expressed	low	0	38.97038471	92.27512147	0	FALSE	NA	NA	NA	NA	NA	none	1.196764594	0	1
ENSG00000090402.8	-	SI	protein_coding	chr3	165075497	0	0	off	low	0	0	0.0621089	0	FALSE	NA	NA	NA	NA	NA	none	0.595068292	0	0
ENSG00000090432.7	-	MUL1	protein_coding	chr1	20505152	29	19.34365218	expressed	low	0	3.040646499	10.03170683	0	FALSE	NA	NA	NA	NA	NA	none	25.93466325	1	1
ENSG00000090447.12	-	TFAP4	protein_coding	chr16	4270076	41	3.113689945	expressed	low	0	7.515318214	12.47628927	0	FALSE	NA	NA	NA	NA	NA	none	86.46841649	0	1
ENSG00000090470.15	-	PDCD7	protein_coding	chr15	65130809	44	15.58234746	expressed	low	0	10.04849394	14.71980936	0	FALSE	NA	NA	NA	NA	NA	none	37.59535057	0	1
ENSG00000090487.11	-	SPG21	protein_coding	chr15	64987311	50	16.24685513	expressed	low	0	6.821714354	14.68520574	0	FALSE	NA	NA	NA	NA	NA	none	21.35514334	0	1
ENSG00000090512.12	+	FETUB	protein_coding	chr3	186632969	2	0	off	low	0	0	0.095976318	0	FALSE	NA	NA	NA	NA	NA	none	0.361017781	1	0
ENSG00000090520.11	+	DNAJB11	protein_coding	chr3	186564403	45	13.62433588	expressed	low	0	3.557354059	5.596200089	0	FALSE	NA	NA	NA	NA	NA	none	51.19472208	0	1
ENSG00000090530.10	-	P3H2	protein_coding	chr3	190119438	0	0	off	low	0	0	0.026364822	0	FALSE	NA	NA	NA	NA	NA	none	0.12033926	0	0
ENSG00000090534.20	-	THPO	protein_coding	chr3	184378969	9	0.043889706	expressed	low	0	0.253156838	1.199384592	0	FALSE	NA	NA	NA	NA	NA	none	1.684749646	1	0
ENSG00000090539.15	+	CHRD	protein_coding	chr3	184377073	15	0.014641123	expressed	low	0	0.252618632	1.223614584	0	FALSE	NA	NA	NA	NA	NA	none	1.678121636	1	1
ENSG00000090554.13	+	FLT3LG	protein_coding	chr19	49471207	33	0.127426098	expressed	low	0	1.57200972	4.658167519	0	FALSE	2	ENSG00000090554.13;ENSG00000273189.1	FLT3LG;AC010619.2	protein_coding;lncRNA	+;+	nearby_same_strand	4.165478046	0	1
ENSG00000090565.16	+	RAB11FIP3	protein_coding	chr16	422649	0	2.566654663	expressed	low	0	2.974749825	6.538475806	0	FALSE	2	ENSG00000276984.1;ENSG00000090565.16	AL023881.1;RAB11FIP3	lncRNA;protein_coding	-;+	bidirectional	0.822490793	0	1
ENSG00000090581.10	+	GNPTG	protein_coding	chr16	1348931	22	5.25937142	expressed	low	0	41.60452283	47.00808075	0	FALSE	2	ENSG00000007520.4;ENSG00000090581.10	TSR3;GNPTG	protein_coding;protein_coding	-;+	bidirectional	0.354389771	0	1
ENSG00000090612.21	+	ZNF268	protein_coding	chr12	133178409	37	2.606724842	expressed	low	0	1.537804738	7.150235665	0	FALSE	NA	NA	NA	NA	NA	none	11.11864311	0	1
ENSG00000090615.15	-	GOLGA3	protein_coding	chr12	132826079	45	15.28158692	expressed	low	0	8.53253172	14.7573869	0	FALSE	NA	NA	NA	NA	NA	none	74.10101979	0	1
ENSG00000090621.14	-	PABPC4	protein_coding	chr1	39573791	37	31.70349476	expressed	low	0	39.66677486	120.1444929	0	FALSE	NA	NA	NA	NA	NA	none	113.7145907	0	1
ENSG00000090659.18	-	CD209	protein_coding	chr19	7744565	4	0.011346748	expressed	low	0	0.006057498	0.124217801	0	FALSE	NA	NA	NA	NA	NA	none	0.12033926	1	0
ENSG00000090661.12	+	CERS4	protein_coding	chr19	8203736	27	0.744259506	expressed	low	0	0.186977447	0.290173338	0	FALSE	NA	NA	NA	NA	NA	none	4.800314398	1	1
ENSG00000090674.16	+	MCOLN1	protein_coding	chr19	7519624	40	0.986336182	expressed	low	0	5.345978149	13.69364128	0	FALSE	NA	NA	NA	NA	NA	none	4.452552636	0	1
ENSG00000090686.16	-	USP48	protein_coding	chr1	21780607	74	31.12325679	expressed	low	0	14.28678468	22.63352036	0	TRUE	NA	NA	NA	NA	NA	none	99.4803828	0	1
ENSG00000090776.6	+	EFNB1	protein_coding	chrX	68826021	6	1.064276441	expressed	low	0	0.910286759	1.326506688	0	FALSE	NA	NA	NA	NA	NA	none	3.603549803	1	0
ENSG00000090857.13	+	PDPR	protein_coding	chr16	70110626	32	8.533270949	expressed	low	0	4.6950363	5.566626424	0	FALSE	NA	NA	NA	NA	NA	none	39.88945961	0	0
ENSG00000090861.15	-	AARS	protein_coding	chr16	70286544	65	135.8714583	expressed	low	0	21.02655573	68.00924578	0	TRUE	2	ENSG00000090861.15;ENSG00000157349.16	AARS;DDX19B	protein_coding;protein_coding	-;+	bidirectional	0.468101022	0	1
ENSG00000090863.11	-	GLG1	protein_coding	chr16	74604145	49	7.017822479	expressed	low	0	5.187913675	9.40567913	0	FALSE	NA	NA	NA	NA	NA	none	32.01894145	0	1
ENSG00000090889.12	+	KIF4A	protein_coding	chrX	70287104	24	28.42232338	expressed	low	0	24.43327463	34.95176311	0	FALSE	NA	NA	NA	NA	NA	none	0.12033926	0	1
ENSG00000090905.19	+	TNRC6A	protein_coding	chr16	24607209	4	5.935169086	expressed	low	0	0	0.052729644	0	FALSE	NA	NA	NA	NA	NA	none	1.905544137	1	0
ENSG00000090924.15	+	PLEKHG2	protein_coding	chr19	39409669	78	1.77517343	expressed	low	0	9.948218029	16.76940307	0	TRUE	NA	NA	NA	NA	NA	none	68.07639367	0	1
ENSG00000090932.10	+	DLL3	protein_coding	chr19	39495895	23	1.428833287	expressed	low	0	0.019509012	0.079094465	0	FALSE	NA	NA	NA	NA	NA	none	4.299073326	0	0
ENSG00000090971.5	+	NAT14	protein_coding	chr19	55482188	26	16.11163398	expressed	low	0	29.24884217	45.62753559	0	FALSE	NA	NA	NA	NA	NA	none	65.66401554	0	1
ENSG00000090975.12	-	PITPNM2	protein_coding	chr12	123147016	27	0.823030072	expressed	low	0	8.36622882	13.8262833	0	FALSE	NA	NA	NA	NA	NA	none	68.85041824	0	1
ENSG00000090989.18	+	EXOC1	protein_coding	chr4	55850648	27	20.38544802	expressed	low	0	3.915139002	8.781833065	0	FALSE	NA	NA	NA	NA	NA	none	13.94050526	0	1
ENSG00000091009.8	+	RBM27	protein_coding	chr5	146200605	61	9.920784194	expressed	low	0	5.63987264	13.72461342	0	FALSE	2	ENSG00000275740.1;ENSG00000091009.8	AC091959.3;RBM27	protein_coding;protein_coding	+;+	nearby_same_strand	0.588440282	0	1
ENSG00000091010.6	+	POU4F3	protein_coding	chr5	146335839	3	0.085910303	expressed	low	0	0.065225287	0.41453334	0	FALSE	NA	NA	NA	NA	NA	none	0.722035563	1	0
ENSG00000091039.17	-	OSBPL8	protein_coding	chr12	76556810	54	22.28712117	expressed	low	0	8.627036545	14.7573869	0	FALSE	NA	NA	NA	NA	NA	none	7.675200628	0	1
ENSG00000091073.19	+	DTX2	protein_coding	chr7	76458676	32	2.960261217	expressed	low	0	4.756170645	8.420647783	0	FALSE	NA	NA	NA	NA	NA	none	25.09228842	0	0
ENSG00000091106.19	-	NLRC4	protein_coding	chr2	32262733	1	0.339858933	expressed	low	0	0.017685618	0.082906668	0	FALSE	NA	NA	NA	NA	NA	none	0.468101022	0	0
ENSG00000091127.14	-	PUS7	protein_coding	chr7	105519272	29	38.0539325	expressed	low	0	4.940501008	12.18728019	0	FALSE	NA	NA	NA	NA	NA	none	112.4505109	0	1
ENSG00000091128.13	-	LAMB4	protein_coding	chr7	108127362	5	0.019551947	expressed	low	0	0.012114996	0.105459287	0	FALSE	NA	NA	NA	NA	NA	none	0.481357042	1	0
ENSG00000091129.20	-	NRCAM	protein_coding	chr7	108453718	1	0.022868151	expressed	low	0	0	0.048459984	0	FALSE	NA	NA	NA	NA	NA	none	0.962714084	1	0
ENSG00000091136.14	-	LAMB1	protein_coding	chr7	108000188	16	8.691180072	expressed	low	0	4.040272926	5.430386753	0	FALSE	NA	NA	NA	NA	NA	none	9.554232726	1	1
ENSG00000091137.14	+	SLC26A4	protein_coding	chr7	107657828	23	0.158143262	expressed	low	0	0.207369337	0.496871202	0	FALSE	NA	NA	NA	NA	NA	none	0.715407553	0	1
ENSG00000091138.12	-	SLC26A3	protein_coding	chr7	107800226	0	0.013849702	expressed	low	0	0	0.0621089	0	FALSE	NA	NA	NA	NA	NA	none	0.835746813	0	0
ENSG00000091140.14	+	DLD	protein_coding	chr7	107888162	56	61.50062543	expressed	low	0	25.75606628	42.61348504	0	FALSE	NA	NA	NA	NA	NA	none	71.61366338	0	1
ENSG00000091157.13	+	WDR7	protein_coding	chr18	56648343	38	2.220364573	expressed	low	0	0.910952397	2.687336894	0	FALSE	NA	NA	NA	NA	NA	none	0	0	1
ENSG00000091164.13	-	TXNL1	protein_coding	chr18	56648601	38	8.620381274	expressed	low	0	0.892779903	2.639348735	0	FALSE	NA	NA	NA	NA	NA	none	0.588440282	0	1
ENSG00000091181.19	-	IL5RA	protein_coding	chr3	3123614	44	0.142782872	expressed	low	0	10.29237582	21.68009368	0	FALSE	2	ENSG00000091181.19;ENSG00000072756.17	IL5RA;TRNT1	protein_coding;protein_coding	-;+	bidirectional	0.234050511	0	1
ENSG00000091262.15	-	ABCC6	protein_coding	chr16	16220523	0	0.042889811	expressed	low	0	0.084919516	0.20726667	0	FALSE	NA	NA	NA	NA	NA	none	0.12033926	0	0
ENSG00000091317.8	-	CMTM6	protein_coding	chr3	32499853	38	37.83241023	expressed	low	0	5.054536714	14.73236476	0	FALSE	NA	NA	NA	NA	NA	none	24.03574712	0	1
ENSG00000091409.15	+	ITGA6	protein_coding	chr2	172424354	0	0.11037512	expressed	low	0	0	0	0	FALSE	NA	NA	NA	NA	NA	none	0	1	0
ENSG00000091428.18	+	RAPGEF4	protein_coding	chr2	172732274	0	0.012237147	expressed	low	0	0	0.082906668	0	FALSE	NA	NA	NA	NA	NA	none	0	1	0
ENSG00000091436.17	+	MAP3K20	protein_coding	chr2	173072435	33	8.465229604	expressed	low	0	2.740417885	8.373573466	0	FALSE	NA	NA	NA	NA	NA	none	47.53607804	0	1
ENSG00000091482.8	-	SMPX	protein_coding	chrX	21755117	0	0	off	low	0	0	0.124217801	0	FALSE	NA	NA	NA	NA	NA	none	0.240678521	0	0
ENSG00000091483.6	-	FH	protein_coding	chr1	241516762	44	246.198828	expressed	low	0	66.90963287	192.05399	0	FALSE	NA	NA	NA	NA	NA	none	32.5874977	0	1
ENSG00000091490.11	-	SEL1L3	protein_coding	chr4	25860761	49	13.27071057	expressed	low	0	1.947874802	3.739520901	0	FALSE	NA	NA	NA	NA	NA	none	0.468101022	0	1
ENSG00000091513.16	+	TF	protein_coding	chr3	133743040	30	0.297939652	expressed	low	0	0.213340503	0.434762302	0	FALSE	NA	NA	NA	NA	NA	none	6.979677106	1	1
ENSG00000091527.15	+	CDV3	protein_coding	chr3	133570730	0	70.34069382	expressed	low	0	29.80981683	38.56962706	0	FALSE	NA	NA	NA	NA	NA	none	41.19123728	0	1
ENSG00000091536.19	+	MYO15A	protein_coding	chr17	18105706	5	0.015628506	expressed	low	0	12.41595104	17.12022694	0	FALSE	NA	NA	NA	NA	NA	none	50.1514368	0	0
ENSG00000091542.9	+	ALKBH5	protein_coding	chr17	18180078	42	25.63430018	expressed	low	0	30.74024558	41.91491772	0	FALSE	NA	NA	NA	NA	NA	none	1.303847835	0	1
ENSG00000091583.11	-	APOH	protein_coding	chr17	66253526	12	0	off	low	1	0	0.041453334	1	FALSE	NA	NA	NA	NA	NA	none	0.12033926	0	0
ENSG00000091592.16	-	NLRP1	protein_coding	chr17	5616425	34	4.937442399	expressed	low	0	5.983361077	17.17976086	0	FALSE	NA	NA	NA	NA	NA	none	16.46100172	0	1
ENSG00000091622.16	-	PITPNM3	protein_coding	chr17	6553556	0	0.074012279	expressed	low	0	0.006057498	0.053806056	0	FALSE	NA	NA	NA	NA	NA	none	0.962714084	1	0
ENSG00000091640.8	-	SPAG7	protein_coding	chr17	4964818	51	11.26438739	expressed	low	0	14.558558	27.65631285	0	FALSE	2	ENSG00000091640.8;ENSG00000262429.1	SPAG7;AC004771.4	protein_coding;lncRNA	-;+	bidirectional	0.601696302	0	1
ENSG00000091651.9	+	ORC6	protein_coding	chr16	46686643	46	15.13424951	expressed	low	0	20.03107775	26.96934526	0	FALSE	2	ENSG00000069329.18;ENSG00000091651.9	VPS35;ORC6	protein_coding;protein_coding	-;+	bidirectional	0	0	1
ENSG00000091656.19	+	ZFHX4	protein_coding	chr8	76678239	4	1.186739203	expressed	low	0	0.026633925	0.287928953	0	FALSE	NA	NA	NA	NA	NA	none	0.240678521	1	0
ENSG00000091664.9	+	SLC17A6	protein_coding	chr11	22335381	3	0	off	low	0	0	0.026903028	0	FALSE	2	ENSG00000254768.6;ENSG00000091664.9	AC104009.1;SLC17A6	lncRNA;protein_coding	-;+	bidirectional	0	1	0
ENSG00000091704.10	+	CPA1	protein_coding	chr7	130377339	2	0	off	low	0	0	0.041453334	0	FALSE	NA	NA	NA	NA	NA	none	1.303847835	1	0
ENSG00000091732.16	-	ZC3HC1	protein_coding	chr7	130048452	48	35.27546822	expressed	low	0	12.85432663	21.64265963	0	FALSE	NA	NA	NA	NA	NA	none	29.5856442	0	1
ENSG00000091831.23	+	ESR1	protein_coding	chr6	151653691	1	0.055200141	expressed	low	0	0	0.012114996	0	FALSE	NA	NA	NA	NA	NA	none	0.240678521	0	0
ENSG00000091844.8	-	RGS17	protein_coding	chr6	153128283	0	0.234685423	expressed	low	0	0	0.095976318	0	FALSE	NA	NA	NA	NA	NA	none	0.708779543	1	0
ENSG00000091879.13	-	ANGPT2	protein_coding	chr8	6560410	4	1.032043297	expressed	low	0	1.15084672	3.167218483	0	FALSE	NA	NA	NA	NA	NA	none	2.513868449	0	0
ENSG00000091947.10	-	TMEM101	protein_coding	chr17	44020947	3	20.68642103	expressed	low	0	2.230171195	3.585615765	0	FALSE	NA	NA	NA	NA	NA	none	36.01768416	0	0
ENSG00000091972.18	+	CD200	protein_coding	chr3	112329347	1	0	off	low	0	0	0.0621089	0	FALSE	NA	NA	NA	NA	NA	none	0.722035563	1	0
ENSG00000091986.15	-	CCDC80	protein_coding	chr3	112646531	0	0.80078406	expressed	low	0	0.006057498	0.053806056	0	FALSE	NA	NA	NA	NA	NA	none	0.240678521	0	0
ENSG00000092009.10	-	CMA1	protein_coding	chr14	24505266	0	0.073251983	expressed	low	0	0.187323949	0.335917112	0	FALSE	NA	NA	NA	NA	NA	none	0.12033926	1	0
ENSG00000092010.15	+	PSME1	protein_coding	chr14	24133163	0	55.78312135	expressed	low	0	78.73589788	192.413373	0	FALSE	NA	NA	NA	NA	NA	none	8.344212111	0	1
ENSG00000092020.10	-	PPP2R3C	protein_coding	chr14	35119518	57	7.092043101	expressed	low	0	20.52560661	37.43076388	0	FALSE	3	ENSG00000092020.10;ENSG00000100890.16;ENSG00000258790.1	PPP2R3C;PRORP;AL121594.1	protein_coding;protein_coding;protein_coding	-;+;+	multiple_nearby_promoters	0	0	1
ENSG00000092036.18	-	HAUS4	protein_coding	chr14	22954162	47	22.87162681	expressed	low	0	13.42686945	24.80987811	0	FALSE	2	ENSG00000092036.18;ENSG00000284118.1	HAUS4;MIR4707	protein_coding;miRNA	-;-	nearby_same_strand	35.62352633	0	1
ENSG00000092051.17	-	JPH4	protein_coding	chr14	23575791	7	0.021187831	expressed	low	0	0.051781117	0.173281795	0	FALSE	NA	NA	NA	NA	NA	none	16.35951141	0	0
ENSG00000092054.13	-	MYH7	protein_coding	chr14	23432661	12	0	off	low	1	0	0.047988159	1	FALSE	NA	NA	NA	NA	NA	none	0.240678521	1	1
ENSG00000092067.5	-	CEBPE	protein_coding	chr14	23116617	19	0.192786812	expressed	low	0	0.158571458	0.373080006	0	FALSE	NA	NA	NA	NA	NA	none	0.842374823	0	0
ENSG00000092068.20	-	SLC7A8	protein_coding	chr14	23180675	10	0.271628497	expressed	low	0	0.113304623	0.577605985	0	FALSE	2	ENSG00000092068.20;ENSG00000215277.8	SLC7A8;RNF212B	protein_coding;protein_coding	-;+	bidirectional	0	0	1
ENSG00000092094.11	-	OSGEP	protein_coding	chr14	20452090	40	14.09448834	expressed	low	0	157.6358417	247.3176408	0	FALSE	2	ENSG00000092094.11;ENSG00000100823.12	OSGEP;APEX1	protein_coding;protein_coding	-;+	bidirectional	0	0	1
ENSG00000092096.16	-	SLC22A17	protein_coding	chr14	23349913	2	0.016044205	expressed	low	0	0.032841663	0.186326701	0	FALSE	NA	NA	NA	NA	NA	none	13.81913092	1	0
ENSG00000092098.17	+	RNF31	protein_coding	chr14	24143683	0	0.197575398	expressed	low	0	74.81743682	127.6348154	0	FALSE	2	ENSG00000092098.17;ENSG00000259529.2	RNF31;AL136295.5	protein_coding;protein_coding	+;+	nearby_same_strand	0	0	1
ENSG00000092108.21	+	SCFD1	protein_coding	chr14	30619311	39	16.29177713	expressed	low	0	4.962685874	9.7895844	0	FALSE	NA	NA	NA	NA	NA	none	42.78319479	0	1
ENSG00000092140.16	+	G2E3	protein_coding	chr14	30556158	33	6.496808221	expressed	low	0	3.944798069	7.959040126	0	FALSE	NA	NA	NA	NA	NA	none	15.03018662	0	1
ENSG00000092148.13	-	HECTD1	protein_coding	chr14	31204805	50	34.28262313	expressed	low	0	10.98733821	28.72716046	0	FALSE	NA	NA	NA	NA	NA	none	55.13837056	0	1
ENSG00000092199.17	-	HNRNPC	protein_coding	chr14	21266495	43	210.9666251	expressed	low	0	162.716625	270.8186179	0	FALSE	NA	NA	NA	NA	NA	none	23.18674429	0	1
ENSG00000092200.12	+	RPGRIP1	protein_coding	chr14	21284939	4	0.371008118	expressed	low	0	0.043076687	0.124360002	0	FALSE	NA	NA	NA	NA	NA	none	0.481357042	0	0
ENSG00000092201.10	-	SUPT16H	protein_coding	chr14	21381020	51	45.07270596	expressed	low	0	29.0086563	39.04616458	0	FALSE	2	ENSG00000092201.10;ENSG00000260830.1	SUPT16H;AL135744.1	protein_coding;lncRNA	-;+	bidirectional	0.240678521	0	1
ENSG00000092203.14	+	TOX4	protein_coding	chr14	21473597	35	9.123407577	expressed	low	0	7.268094894	10.38363903	0	FALSE	NA	NA	NA	NA	NA	none	1.531270336	0	1
ENSG00000092208.17	+	GEMIN2	protein_coding	chr14	39111223	23	13.03775498	expressed	low	0	4.925667032	10.6120535	0	FALSE	NA	NA	NA	NA	NA	none	8.418155302	0	1
ENSG00000092295.12	-	TGM1	protein_coding	chr14	24261433	0	0.238028795	expressed	low	0	4.065950701	9.39206835	0	FALSE	NA	NA	NA	NA	NA	none	9.066247674	0	0
ENSG00000092330.18	-	TINF2	protein_coding	chr14	24239675	0	13.40612399	expressed	low	0	22.49603622	35.41526121	0	FALSE	NA	NA	NA	NA	NA	none	50.49257055	0	1
ENSG00000092345.13	-	DAZL	protein_coding	chr3	16667307	1	0	off	low	0	0	0	0	FALSE	NA	NA	NA	NA	NA	none	0.12033926	1	0
ENSG00000092377.15	+	TBL1Y	protein_coding	chrY	6907686	0	0	off	low	0	0	0.124360002	0	FALSE	NA	NA	NA	NA	NA	none	0	0	0
ENSG00000092421.16	-	SEMA6A	protein_coding	chr5	116571935	1	0.240386438	expressed	low	0	0	0	0	FALSE	NA	NA	NA	NA	NA	none	0.12033926	1	0
ENSG00000092439.16	-	TRPM7	protein_coding	chr15	50683798	54	20.87163131	expressed	low	0	4.61973939	13.09925354	0	FALSE	NA	NA	NA	NA	NA	none	42.75005474	0	1
ENSG00000092445.12	+	TYRO3	protein_coding	chr15	41554675	19	6.883115461	expressed	low	0	8.215144392	28.01389027	0	FALSE	2	ENSG00000259838.1;ENSG00000092445.12	ELOCP2;TYRO3	unprocessed_pseudogene;protein_coding	+;+	nearby_same_strand	26.50218442	0	1
ENSG00000092470.12	+	WDR76	protein_coding	chr15	43823980	72	36.38384136	expressed	low	0	38.40688778	57.9217077	0	FALSE	NA	NA	NA	NA	NA	none	6.071022183	0	1
ENSG00000092529.24	+	CAPN3	protein_coding	chr15	42356500	0	0.013091542	expressed	low	0	0.212802296	0.580346676	0	FALSE	NA	NA	NA	NA	NA	none	2.253305899	1	0
ENSG00000092531.10	+	SNAP23	protein_coding	chr15	42488233	42	18.01307471	expressed	low	0	3.859082583	7.797680796	0	FALSE	2	ENSG00000103994.17;ENSG00000092531.10	ZNF106;SNAP23	protein_coding;protein_coding	-;+	bidirectional	0	0	1
ENSG00000092607.15	-	TBX15	protein_coding	chr1	118986557	6	7.104559041	expressed	low	0	2.803278594	6.238460647	0	FALSE	NA	NA	NA	NA	NA	none	2.253305899	1	1
ENSG00000092621.12	+	PHGDH	protein_coding	chr1	119645411	51	12.99552352	expressed	low	0	1.508113687	5.902543536	0	FALSE	2	ENSG00000143067.5;ENSG00000092621.12	ZNF697;PHGDH	protein_coding;protein_coding	-;+	bidirectional	0	0	1
ENSG00000092758.18	+	COL9A3	protein_coding	chr20	62813244	7	0.291609261	expressed	low	0	19.94767893	39.57435428	0	FALSE	NA	NA	NA	NA	NA	none	61.42562938	1	0
ENSG00000092820.18	-	EZR	protein_coding	chr6	158816369	58	89.00032146	expressed	low	0	17.20392446	23.33822704	0	FALSE	NA	NA	NA	NA	NA	none	0.702151533	0	1
ENSG00000092841.18	+	MYL6	protein_coding	chr12	56155161	60	126.6636203	expressed	low	0	553.1462726	1171.249641	0	FALSE	NA	NA	NA	NA	NA	none	0	0	1
ENSG00000092847.12	+	AGO1	protein_coding	chr1	35866808	38	17.52669812	expressed	low	0	2.259434623	6.430413283	0	FALSE	NA	NA	NA	NA	NA	none	10.93865176	0	1
ENSG00000092850.12	+	TEKT2	protein_coding	chr1	36081094	5	0.248570428	expressed	low	0	0.088342701	0.165813336	0	FALSE	2	ENSG00000232862.5;ENSG00000092850.12	AL138787.1;TEKT2	transcribed_processed_pseudogene;protein_coding	-;+	bidirectional	2.380273169	0	0
ENSG00000092853.14	-	CLSPN	protein_coding	chr1	35766979	46	18.67695823	expressed	low	0	4.968201794	7.678105412	0	FALSE	NA	NA	NA	NA	NA	none	72.08735733	0	1
ENSG00000092871.16	-	RFFL	protein_coding	chr17	35086320	26	2.239848128	expressed	low	0	1.598488796	3.791064547	0	FALSE	NA	NA	NA	NA	NA	none	42.69806574	0	1
ENSG00000092929.11	-	UNC13D	protein_coding	chr17	75841718	50	35.55005514	expressed	low	0	96.71361112	150.8183753	0	TRUE	NA	NA	NA	NA	NA	none	151.3374884	0	1
ENSG00000092931.11	+	MFSD11	protein_coding	chr17	76732865	65	7.973686761	expressed	low	0	417.4135108	491.2220078	0	FALSE	NA	NA	NA	NA	NA	none	0	0	1
ENSG00000092964.18	+	DPYSL2	protein_coding	chr8	26511031	4	0.859572444	expressed	low	0	0	0.011141244	0	FALSE	NA	NA	NA	NA	NA	none	0	1	0
ENSG00000092969.12	+	TGFB2	protein_coding	chr1	218342336	30	0.051128144	expressed	low	0	0.137534615	1.151715812	0	FALSE	NA	NA	NA	NA	NA	none	0.240678521	1	0
ENSG00000092978.11	-	GPATCH2	protein_coding	chr1	217628091	8	0.465123653	expressed	low	0	0.218378399	0.863786859	0	FALSE	2	ENSG00000092978.11;ENSG00000162814.11	GPATCH2;SPATA17	protein_coding;protein_coding	-;+	bidirectional	0	0	0
ENSG00000093000.19	+	NUP50	protein_coding	chr22	45160925	29	20.41135803	expressed	low	0	12.31896159	15.42064025	0	FALSE	2	ENSG00000226328.7;ENSG00000093000.19	NUP50-DT;NUP50	lncRNA;protein_coding	-;+	bidirectional	0	0	1
ENSG00000093009.10	+	CDC45	protein_coding	chr22	19476457	69	180.5713032	expressed	low	0	93.99698839	170.8843943	0	TRUE	2	ENSG00000070010.19;ENSG00000093009.10	UFD1;CDC45	protein_coding;protein_coding	-;+	bidirectional	3.202763962	0	1
ENSG00000093010.13	+	COMT	protein_coding	chr22	19938607	58	53.81449812	expressed	low	0	34.301228	46.5602753	0	TRUE	NA	NA	NA	NA	NA	none	0.361017781	0	1
ENSG00000093072.18	-	ADA2	protein_coding	chr22	17255236	1	0.002877099	expressed	low	0	0.005570622	0.124217801	0	FALSE	NA	NA	NA	NA	NA	none	0.234050511	1	0
ENSG00000093100.13	-	AC016026.1	lncRNA	chr22	17808498	1	0.076507091	expressed	low	0	2.975186845	3.611980586	0	FALSE	NA	NA	NA	NA	NA	none	9.681199996	0	0
ENSG00000093134.14	-	VNN3	protein_coding	chr6	132731766	1	0	off	low	0	0	0.026364822	0	FALSE	NA	NA	NA	NA	NA	none	0	0	0
ENSG00000093144.19	-	ECHDC1	protein_coding	chr6	127340610	52	18.96521752	expressed	low	0	9.402044603	14.82834108	0	FALSE	NA	NA	NA	NA	NA	none	32.40087834	0	1
ENSG00000093167.18	-	LRRFIP2	protein_coding	chr3	37180690	6	9.505636747	expressed	low	0	1.558488263	2.439932347	0	FALSE	NA	NA	NA	NA	NA	none	1.551154366	0	0
ENSG00000093183.14	-	SEC22C	protein_coding	chr3	42598081	47	15.06119459	expressed	low	0	6.028865392	21.40271884	0	FALSE	NA	NA	NA	NA	NA	none	0.842374823	0	1
ENSG00000093217.11	+	XYLB	protein_coding	chr3	38343760	48	4.308116823	expressed	low	0	4.411688977	7.438164618	0	FALSE	NA	NA	NA	NA	NA	none	35.05497008	0	1
ENSG00000094631.21	+	HDAC6	protein_coding	chrX	48798377	82	14.18483132	expressed	low	0	19.4348819	40.86765637	0	FALSE	NA	NA	NA	NA	NA	none	34.21156018	0	1
ENSG00000094661.3	+	OR1I1	protein_coding	chr19	15079211	3	0.00719743	expressed	low	0	0	0.047988159	0	FALSE	NA	NA	NA	NA	NA	none	0.240678521	1	0
ENSG00000094755.17	+	GABRP	protein_coding	chr5	170760350	0	0	off	low	0	0.052874379	0.210918574	0	FALSE	NA	NA	NA	NA	NA	none	0.240678521	1	0
ENSG00000094796.5	-	KRT31	protein_coding	chr17	41394609	0	0	off	low	0	0	0.012114996	0	FALSE	NA	NA	NA	NA	NA	none	0.12033926	1	0
ENSG00000094804.12	+	CDC6	protein_coding	chr17	40284879	46	38.03332442	expressed	low	0	25.37405736	48.85194568	0	FALSE	NA	NA	NA	NA	NA	none	61.40367519	0	1
ENSG00000094841.14	+	UPRT	protein_coding	chrX	75153388	31	6.18789744	expressed	low	0	3.167015138	7.582129094	0	FALSE	NA	NA	NA	NA	NA	none	0	0	1
[truncated: 34,815 more rows]
